# Supplementary material for: Genome and epigenome wide studies of neurological protein biomarkers in the Lothian Birth Cohort 1936
Source: PubMed Central journal article supplement (PMC6639385; doi:10.1038/s41467-019-11177-x), 2019-07-18

# Pre-adjusted NMNAT1 distribution

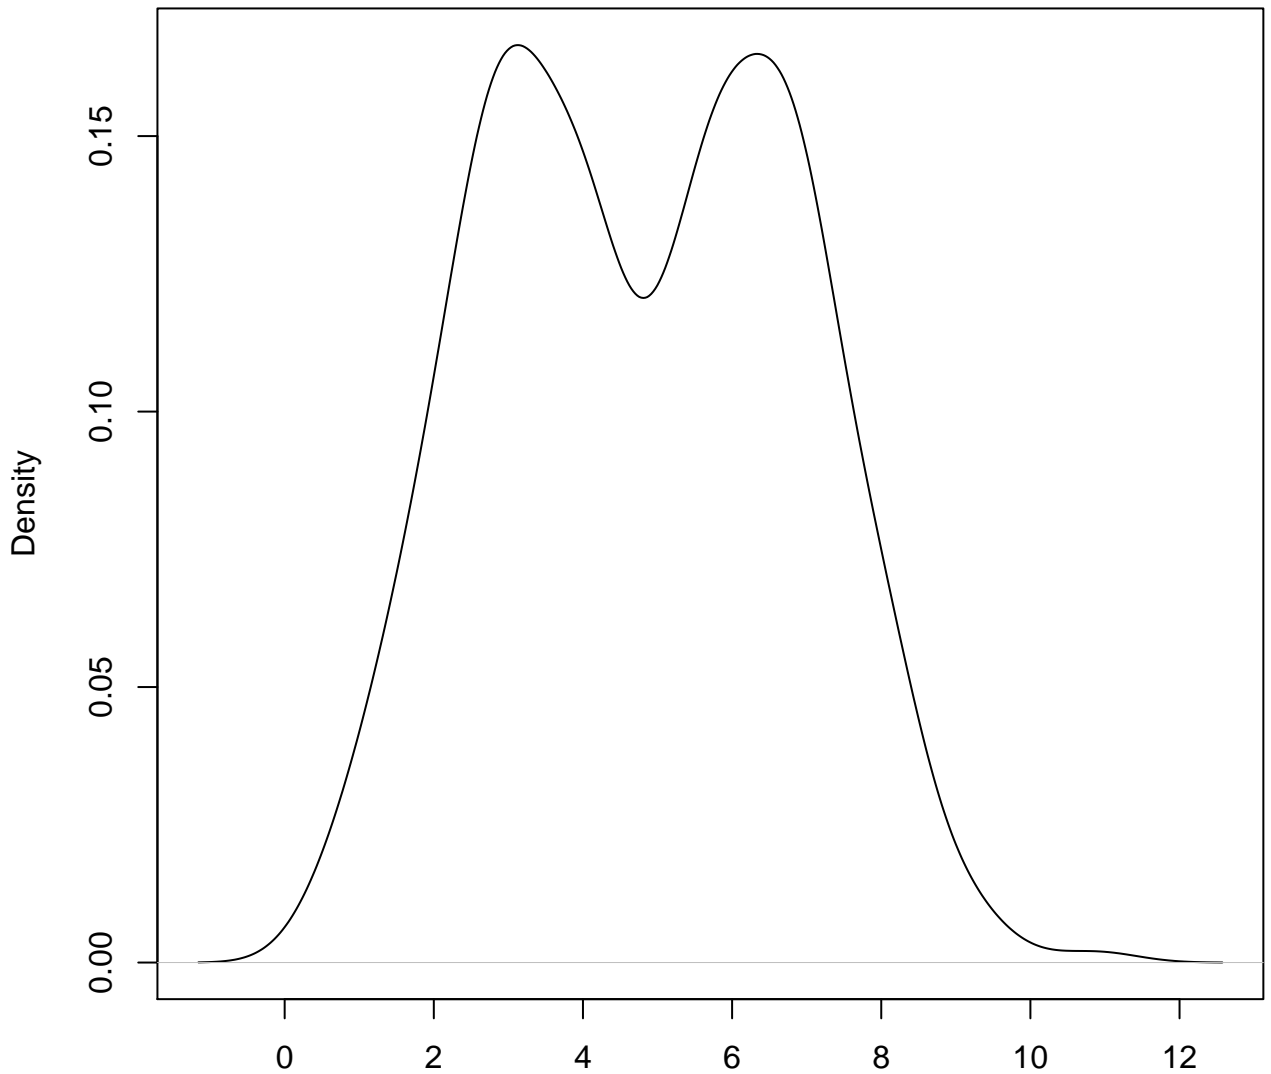

# Pre-adjusted NRP2 distribution

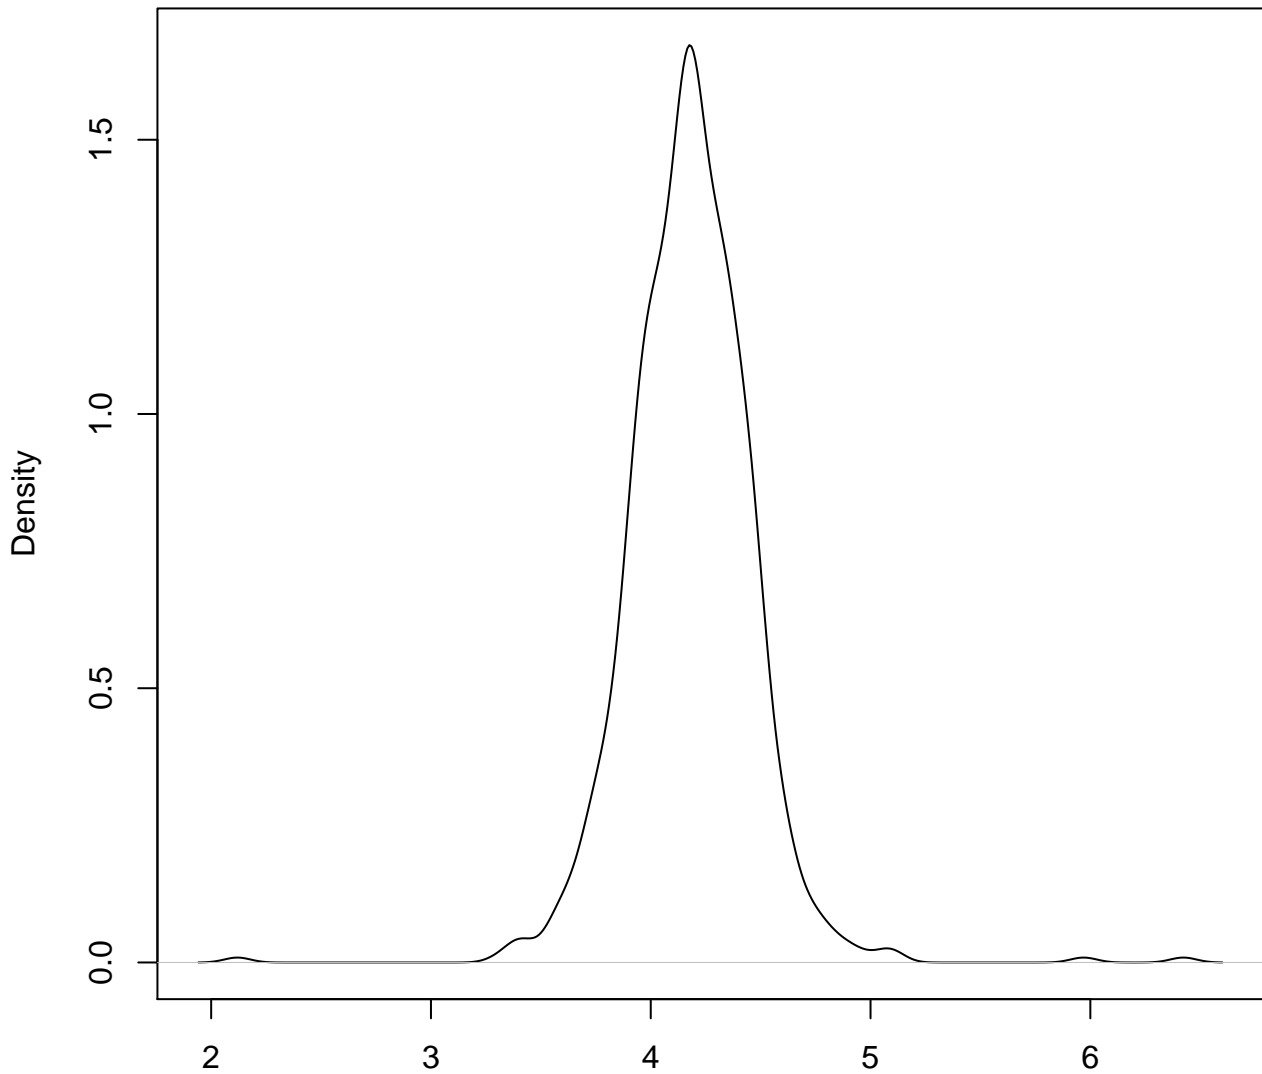

# Pre-adjusted MAPT distribution

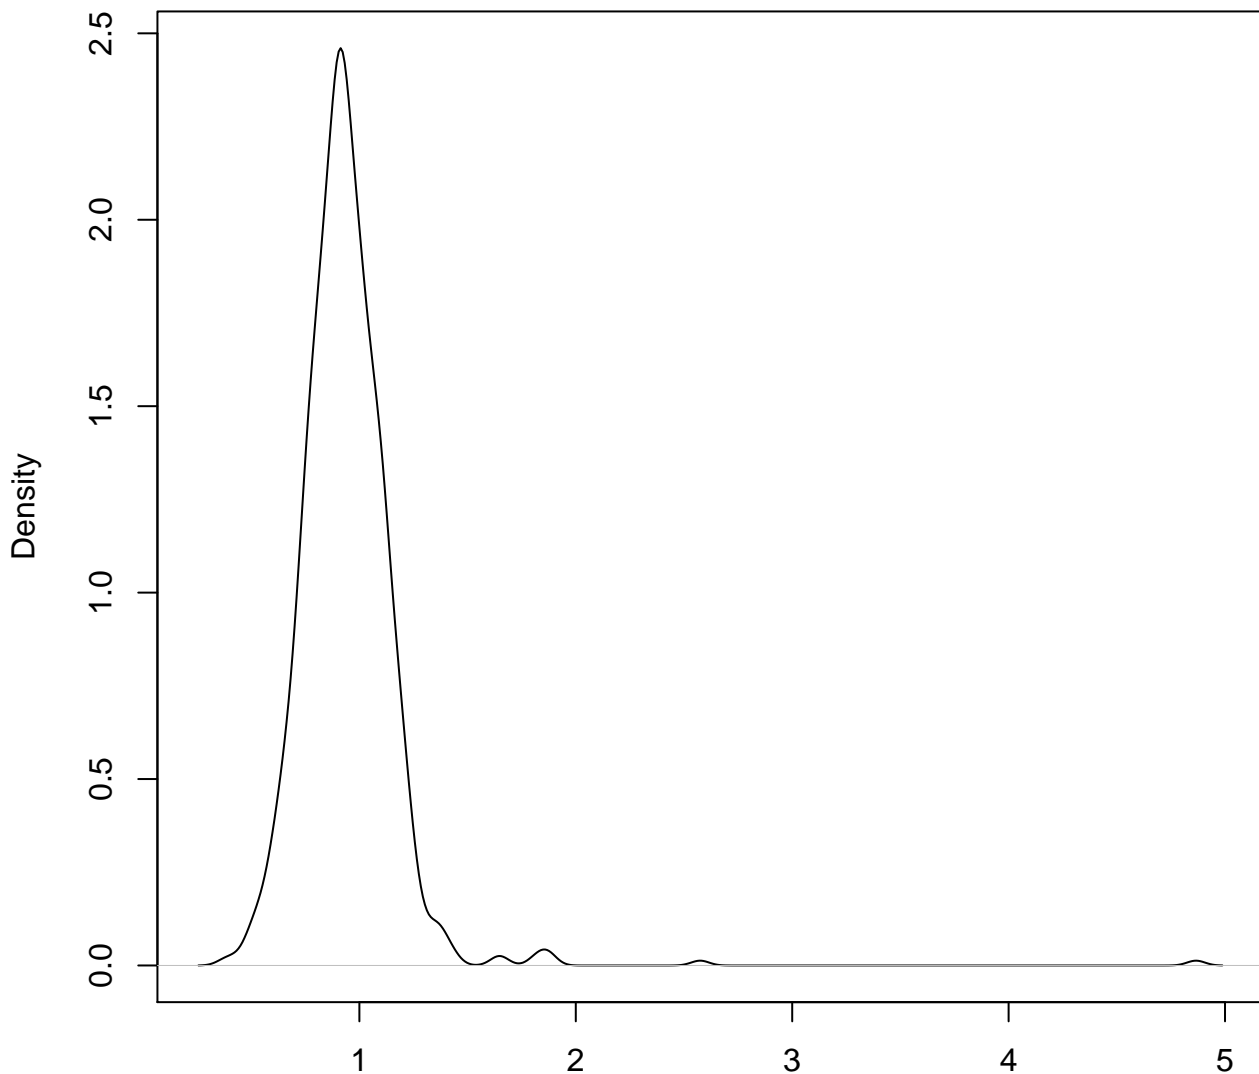

# Pre-adjusted CADM3 distribution

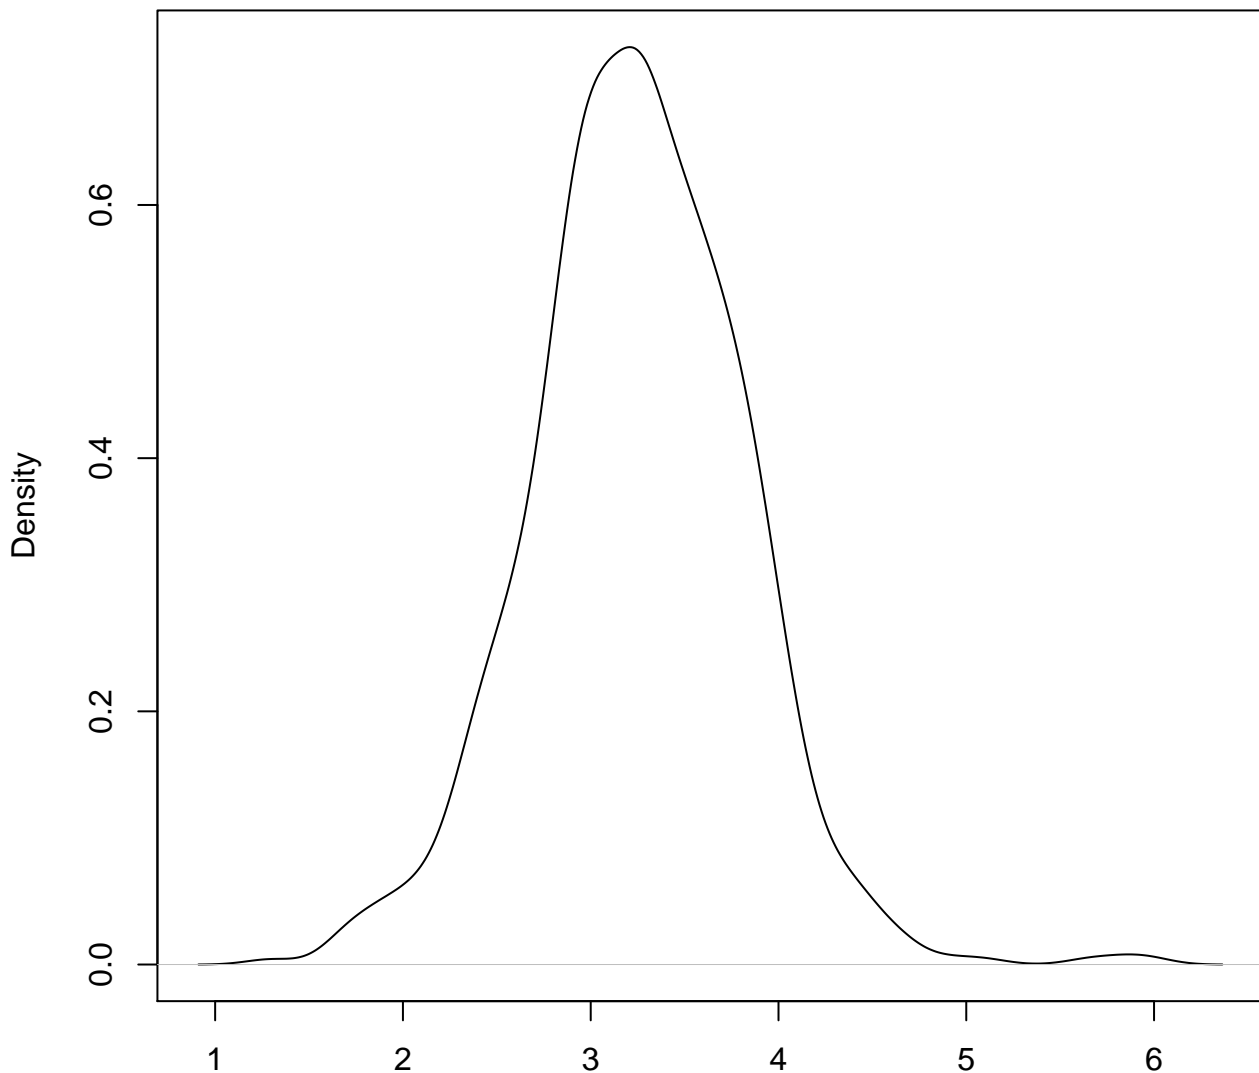

# Pre-adjusted GDNF distribution

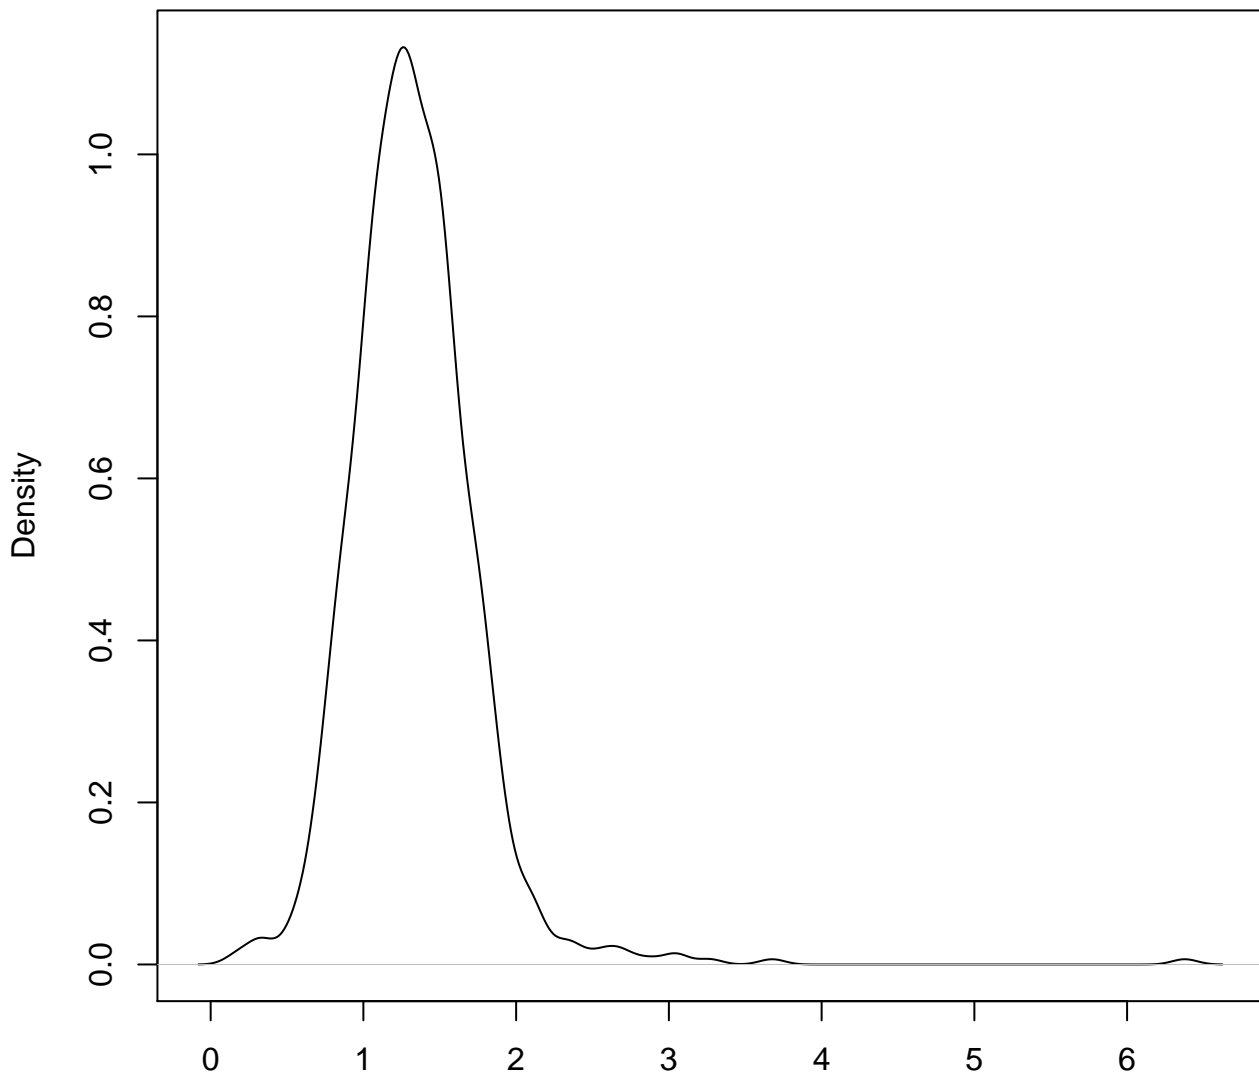

# Pre-adjusted UNC5C distribution

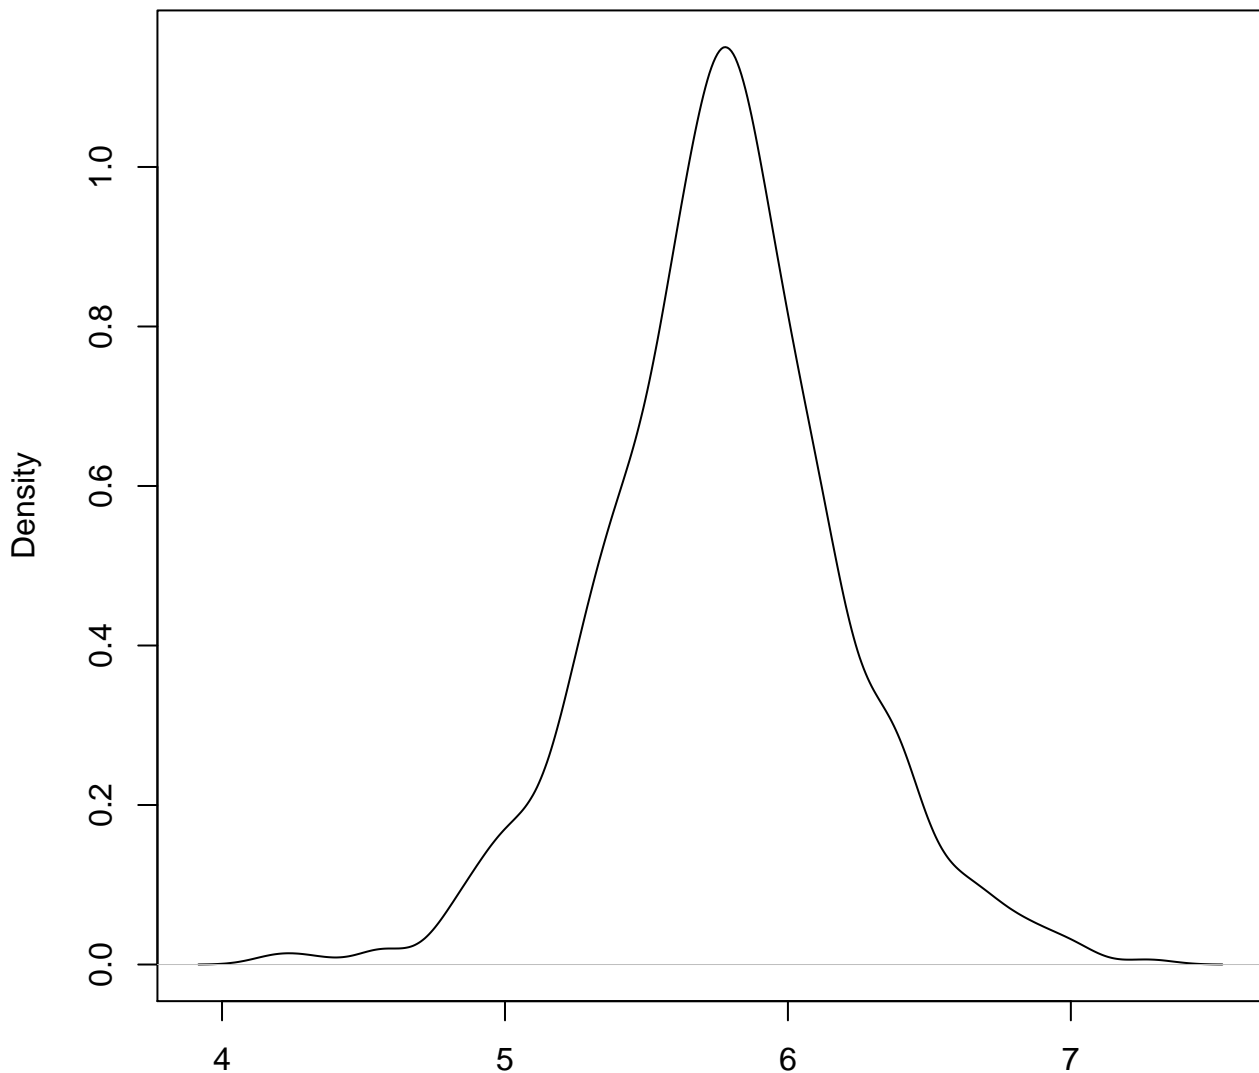

# Pre-adjusted VWC2 distribution

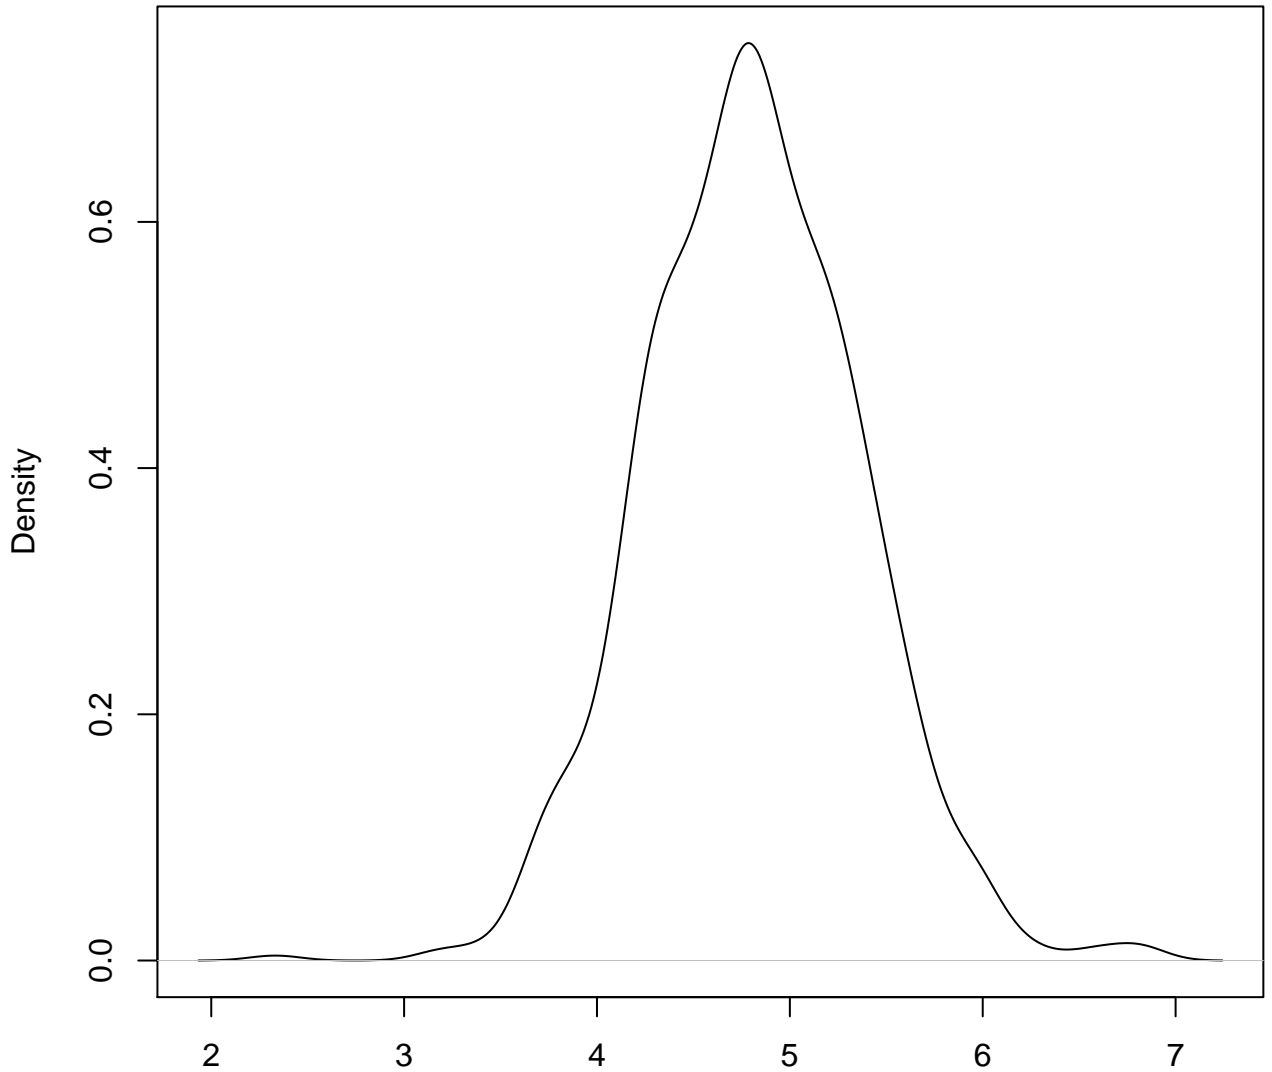

# Pre-adjusted Siglec-9 distribution

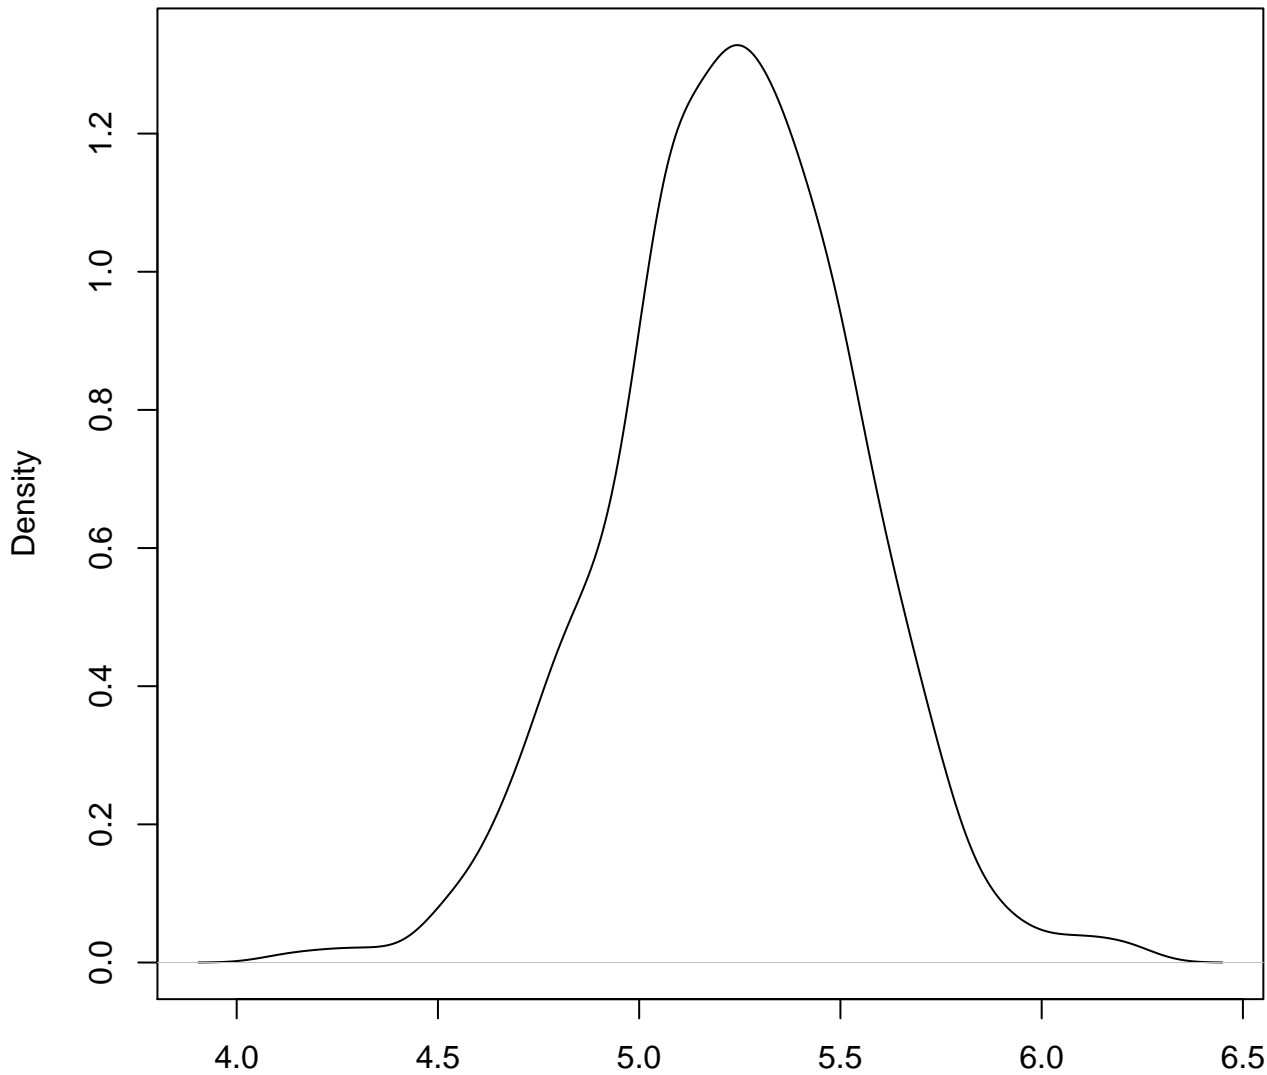



# Pre-adjusted CLM-6 distribution

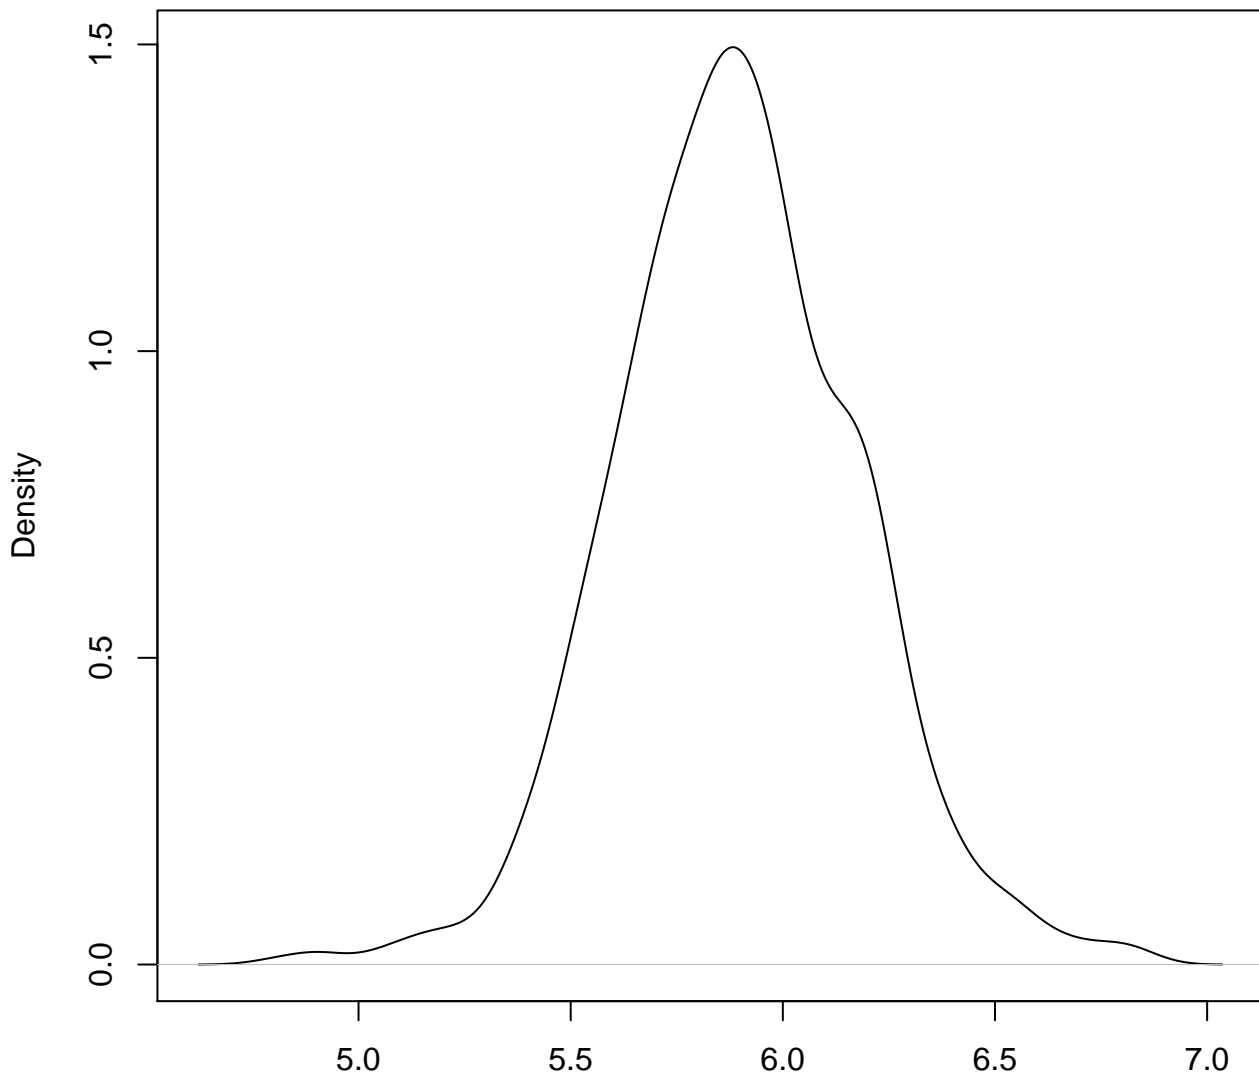

# Pre-adjusted EZR distribution

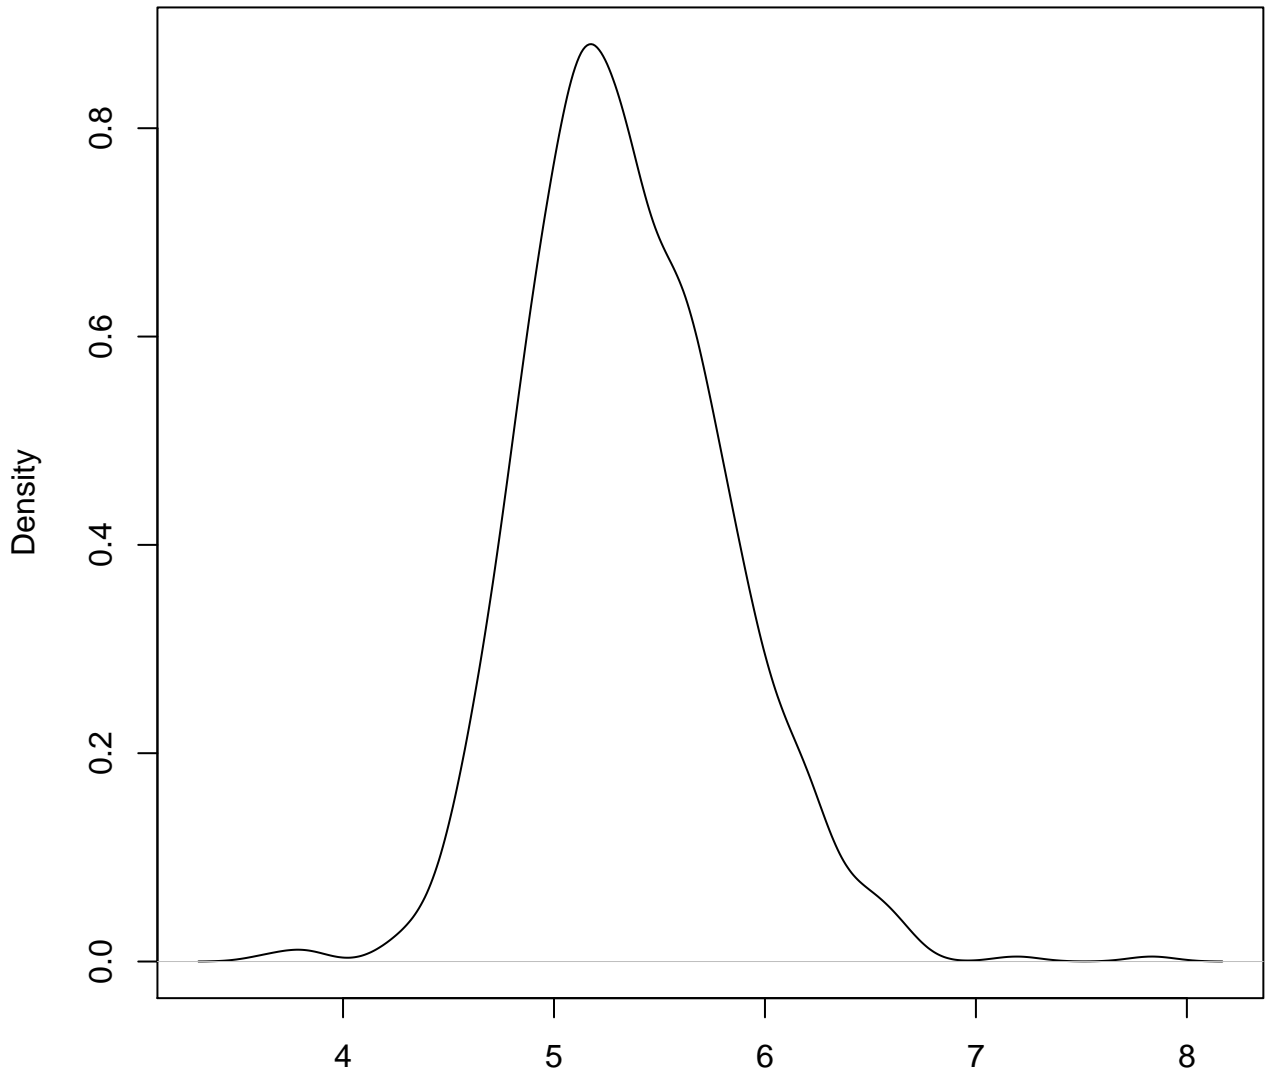

# Pre-adjusted SMOC2 distribution

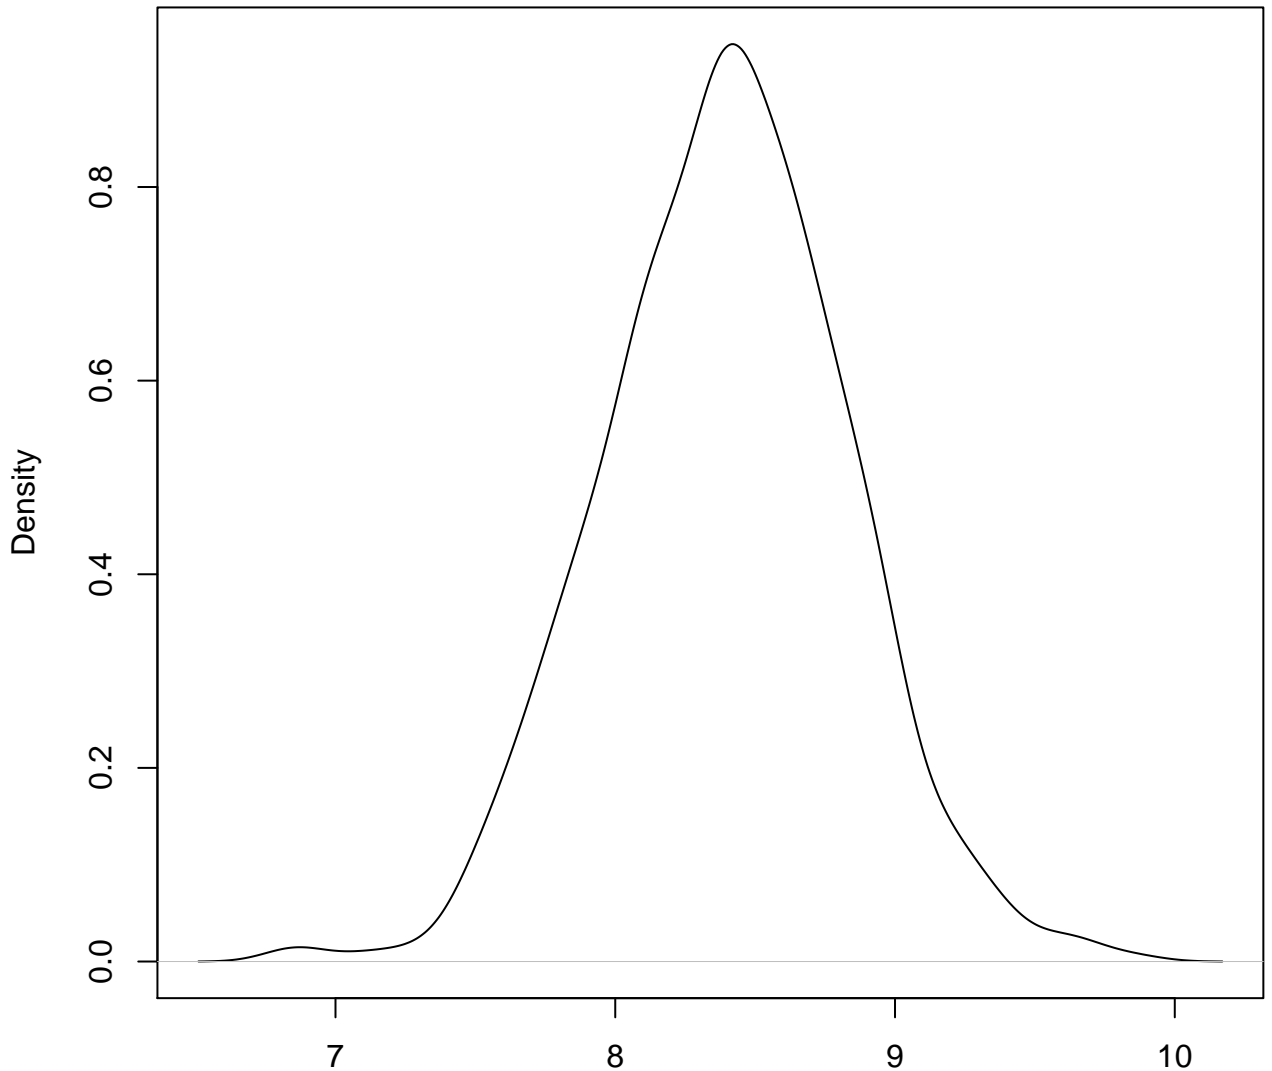

# Pre-adjusted NBL1 distribution

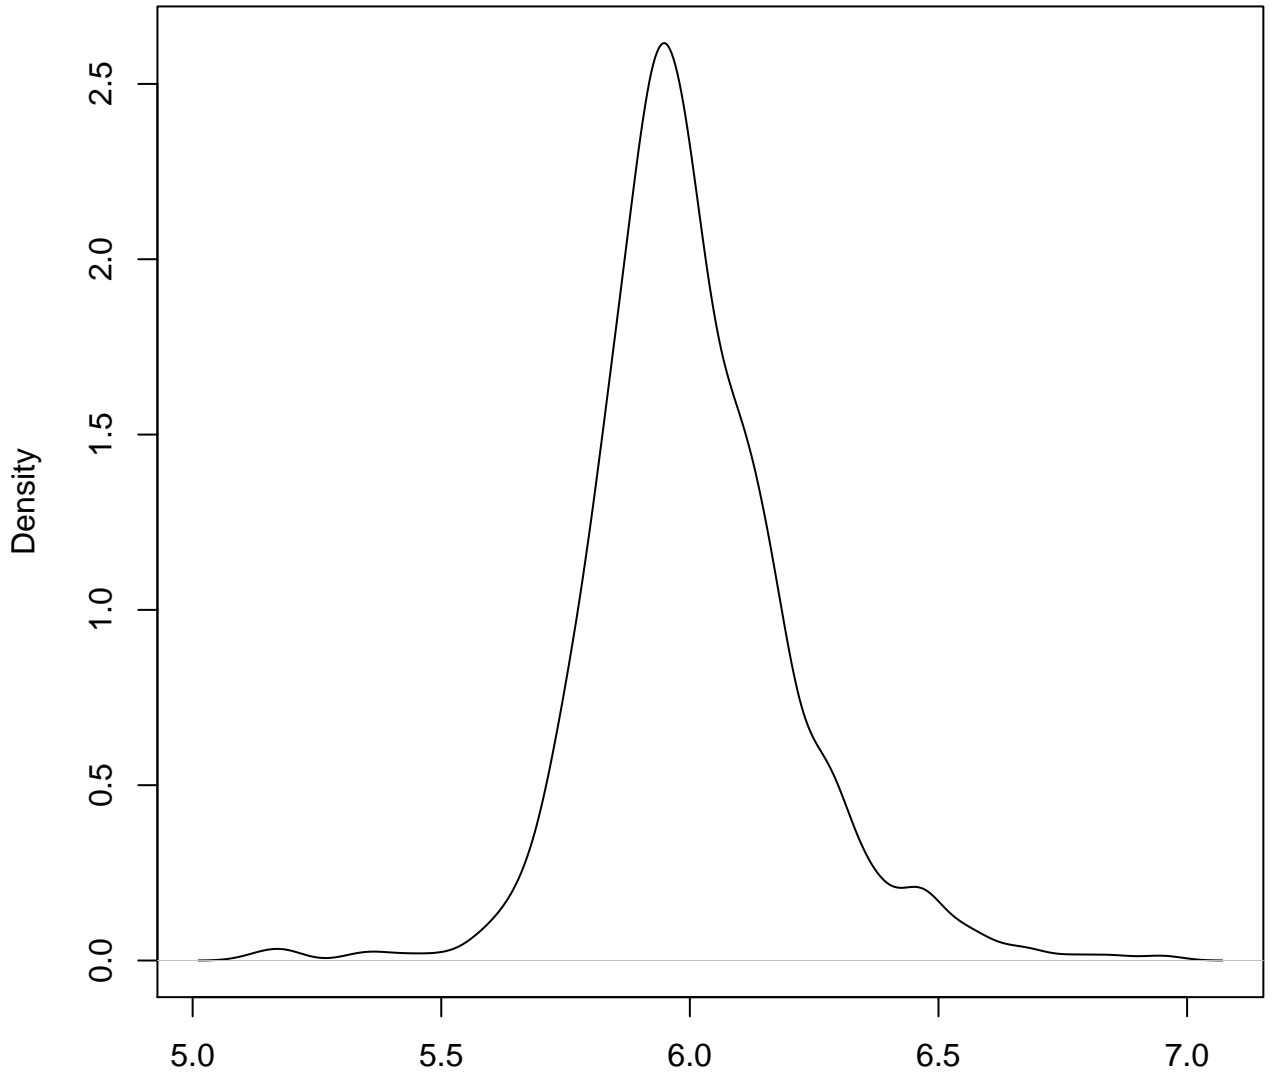

# Pre-adjusted EFNA4 distribution

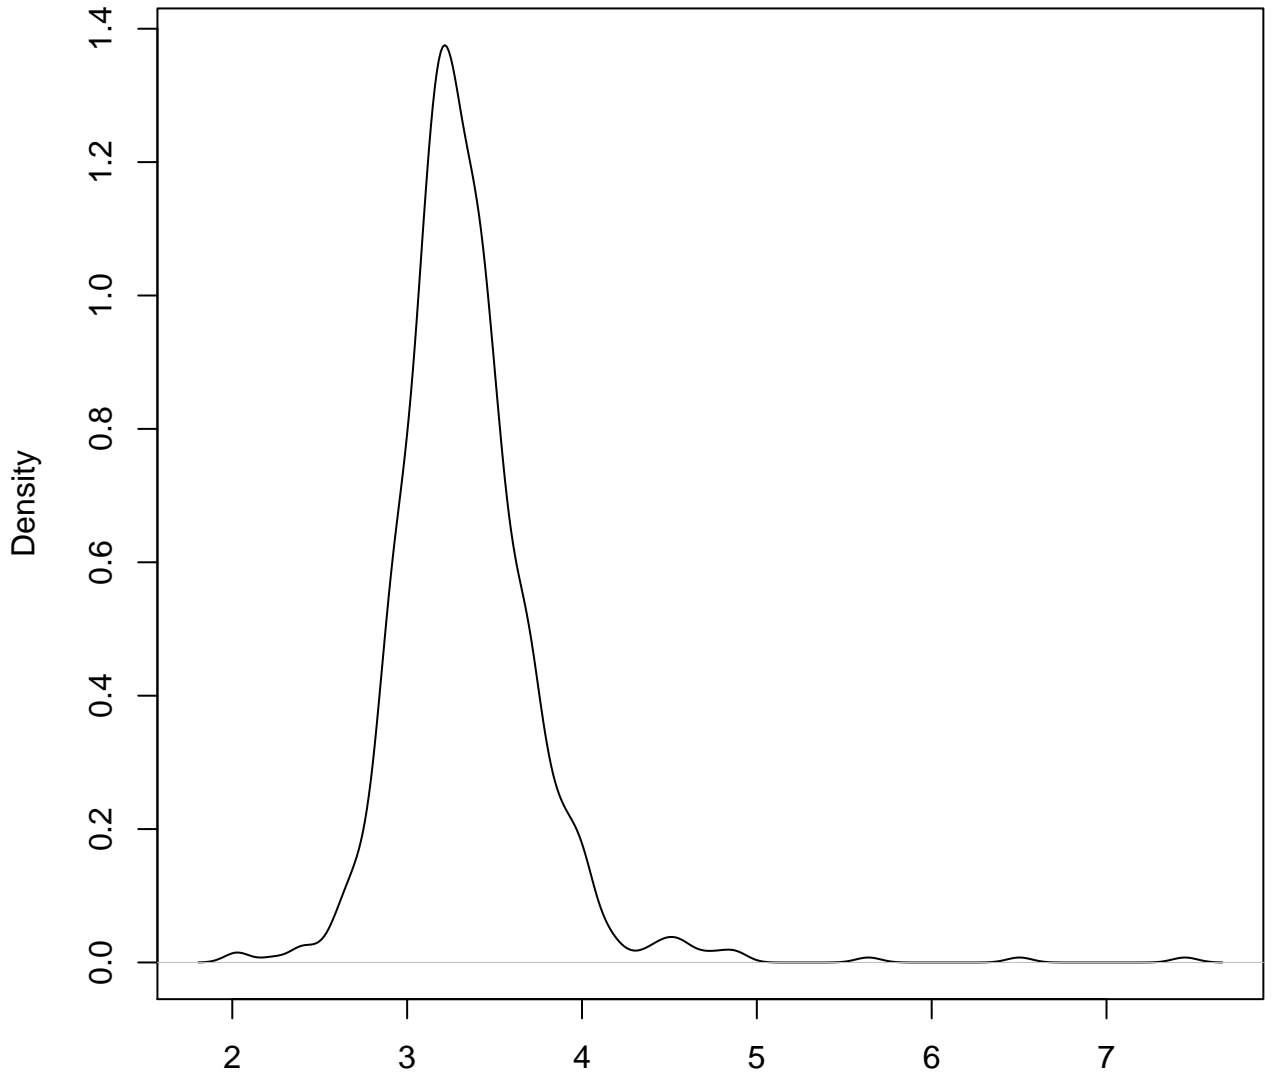

# Pre-adjusted SCARB2 distribution

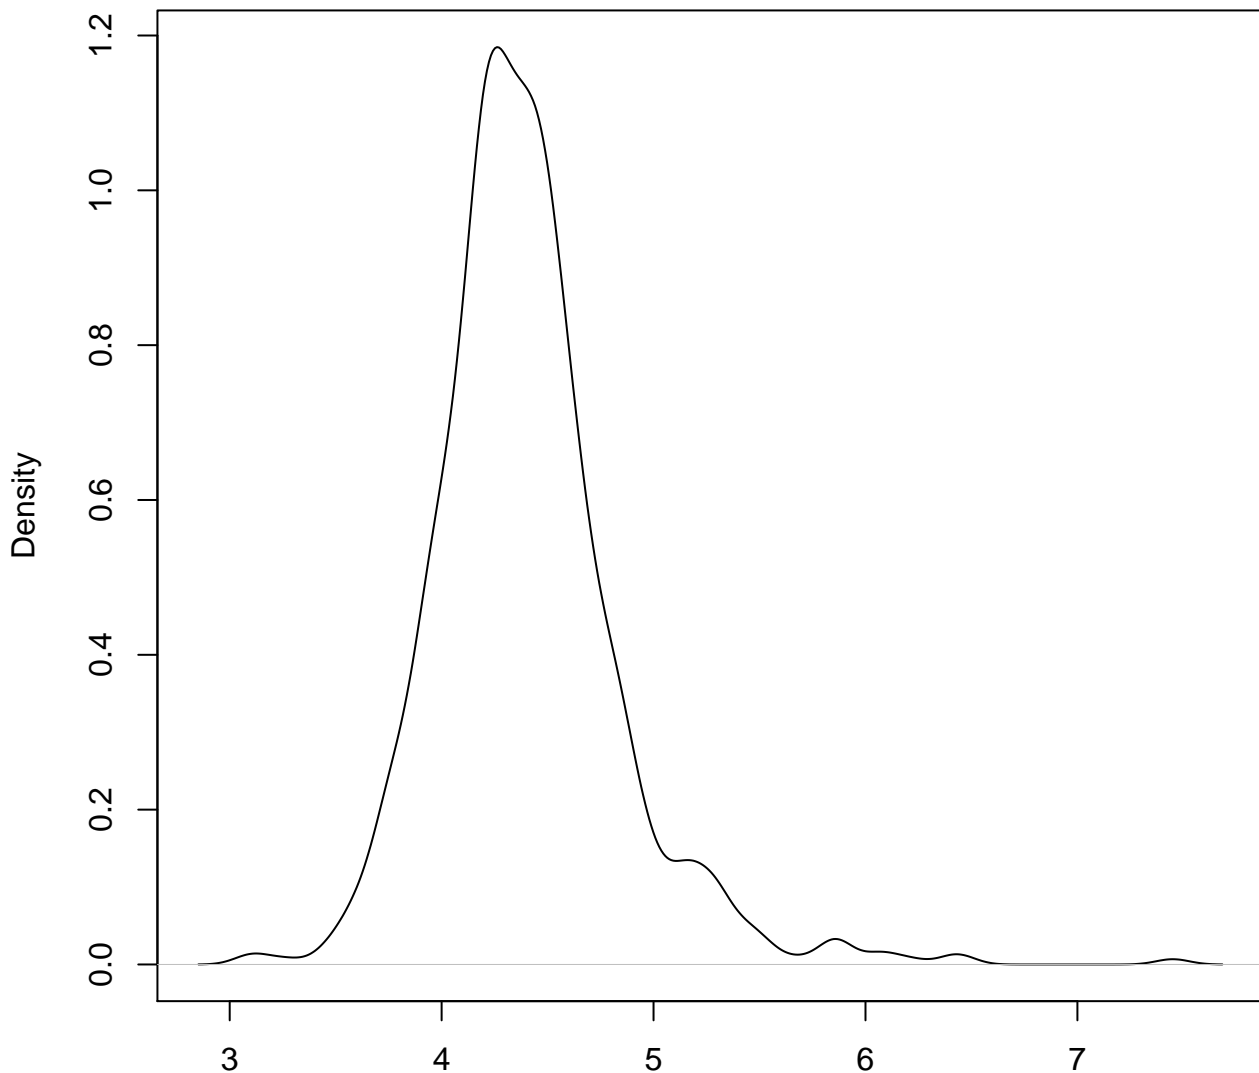

# Pre-adjusted NCAN distribution

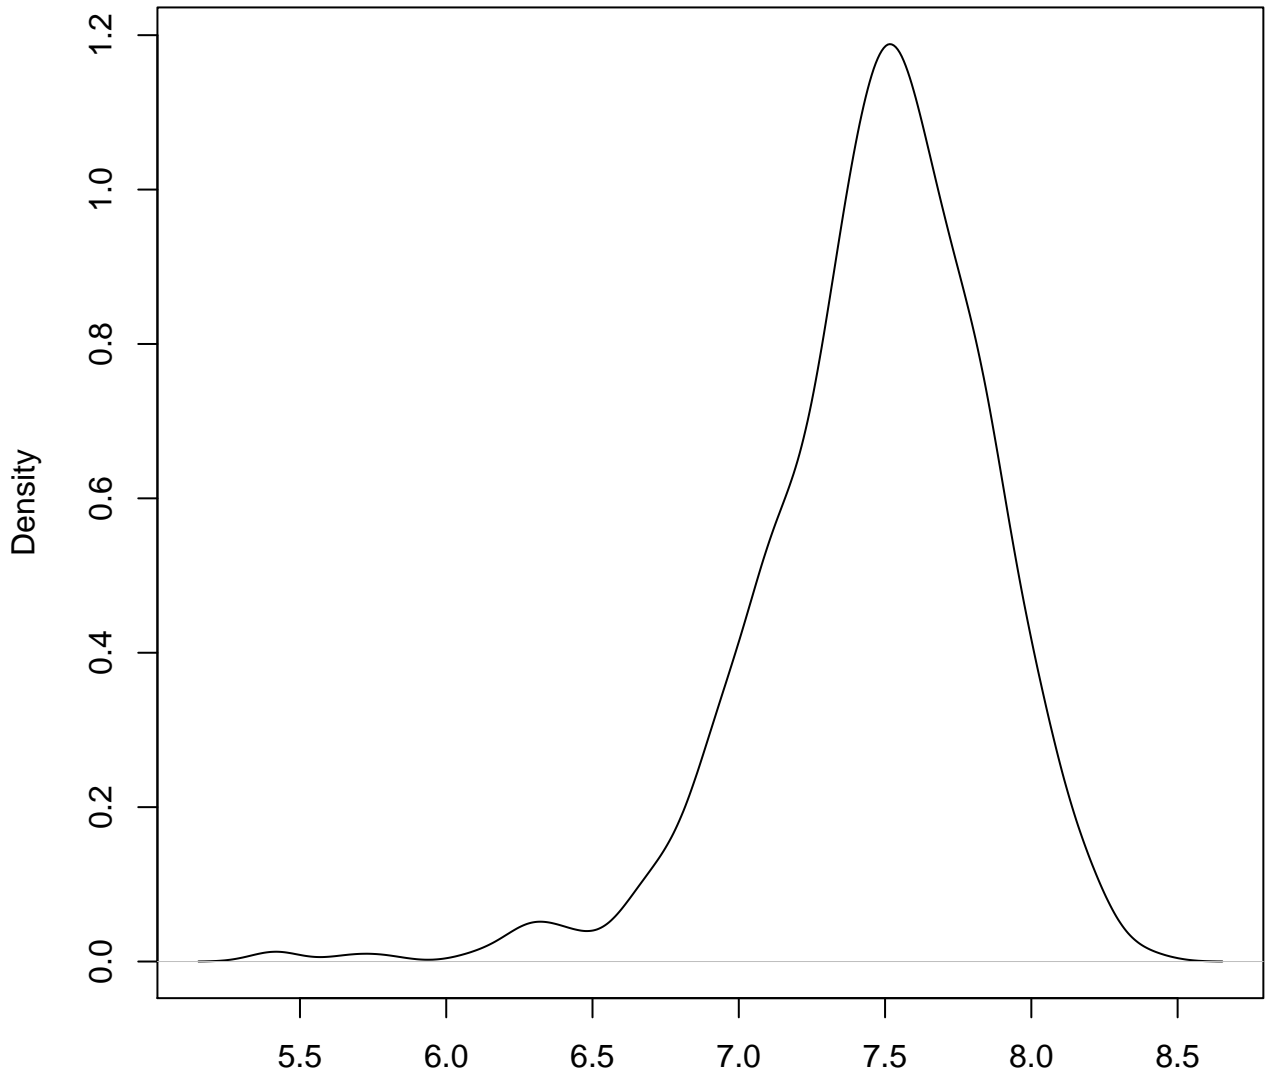

# Pre-adjusted PRTG distribution

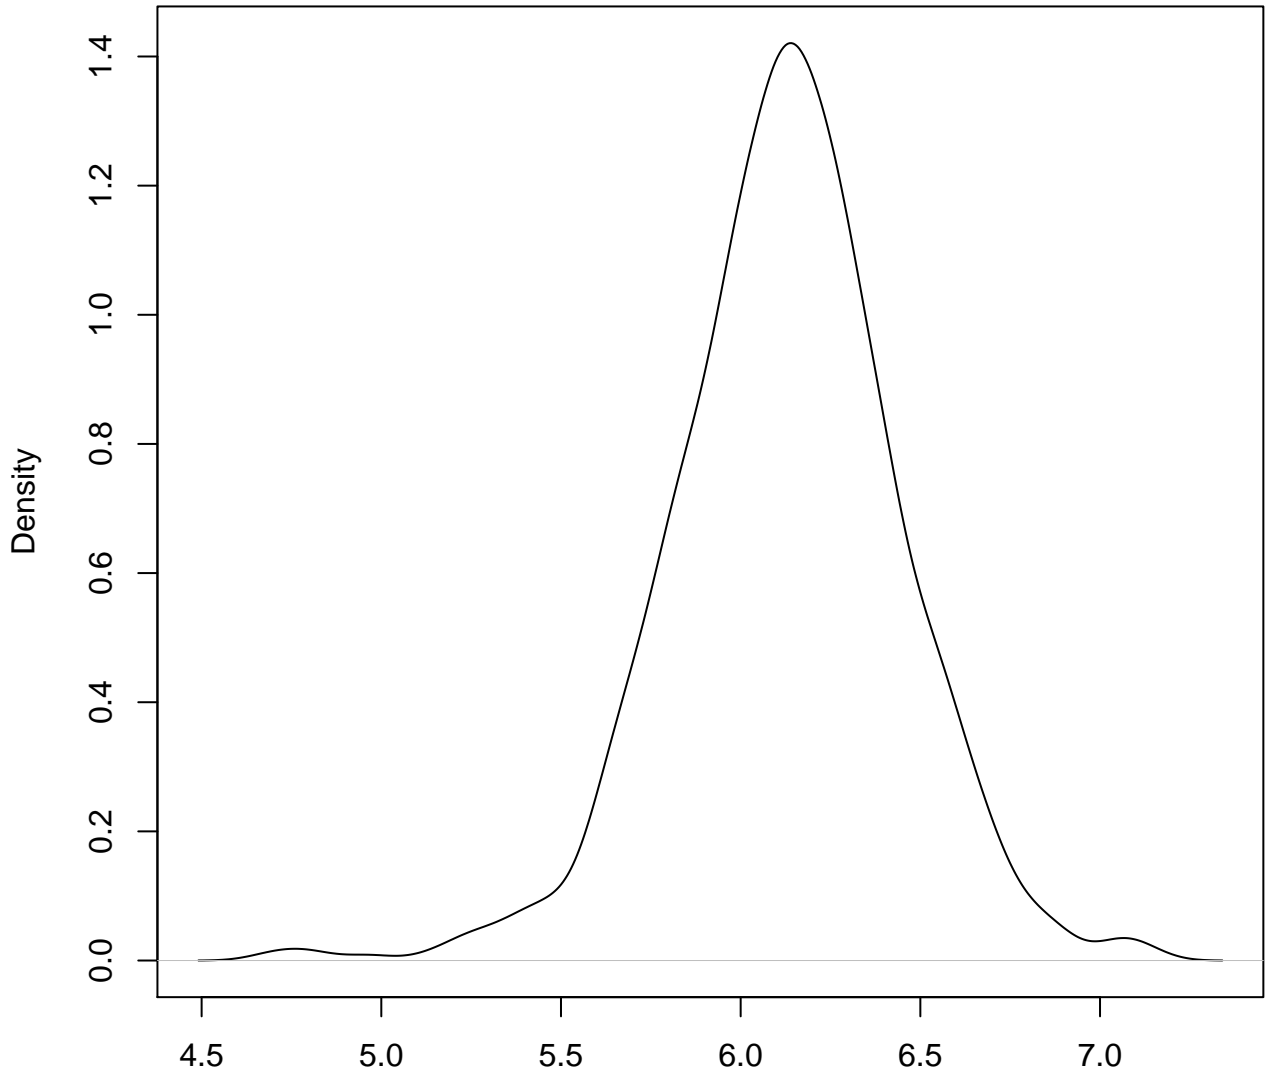



# Pre-adjusted ROBO2 distribution

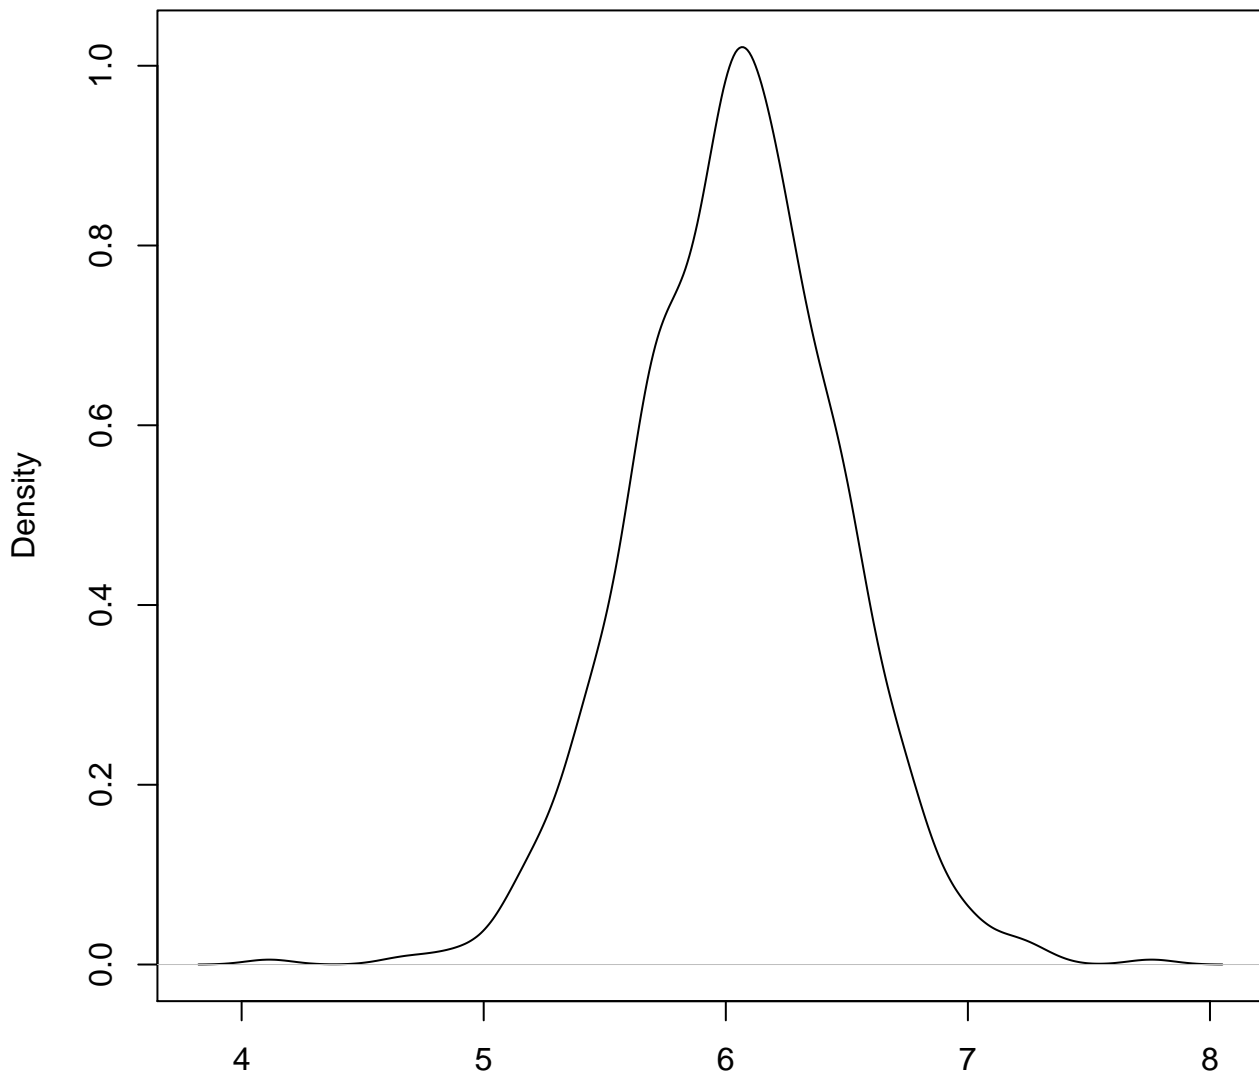

# Pre-adjusted CRTAM distribution

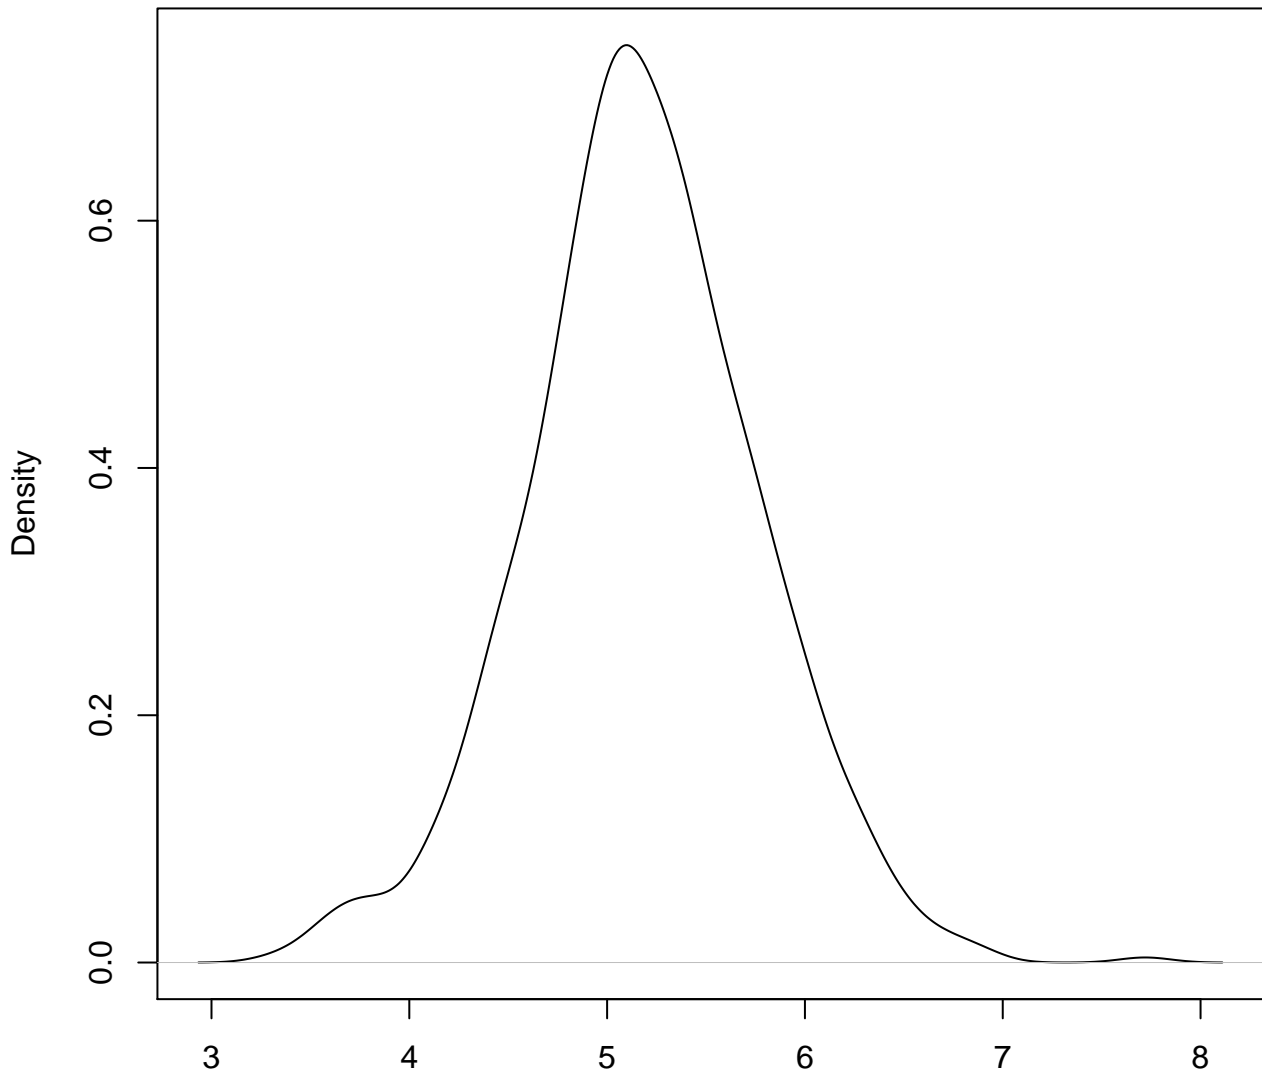

# Pre-adjusted RGMA distribution

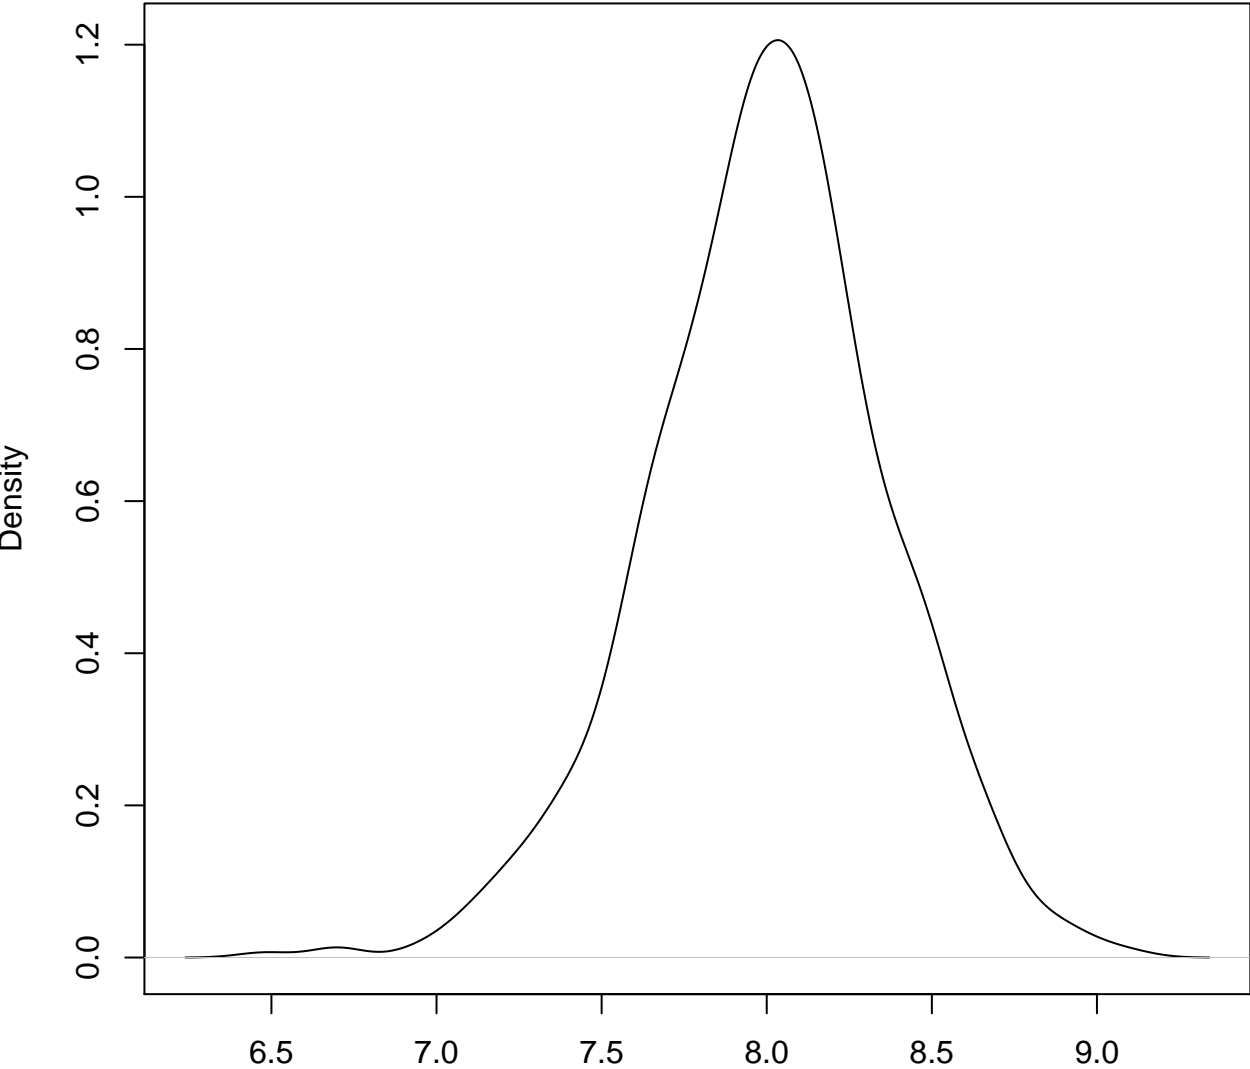

# Pre-adjusted PLXNB3 distribution

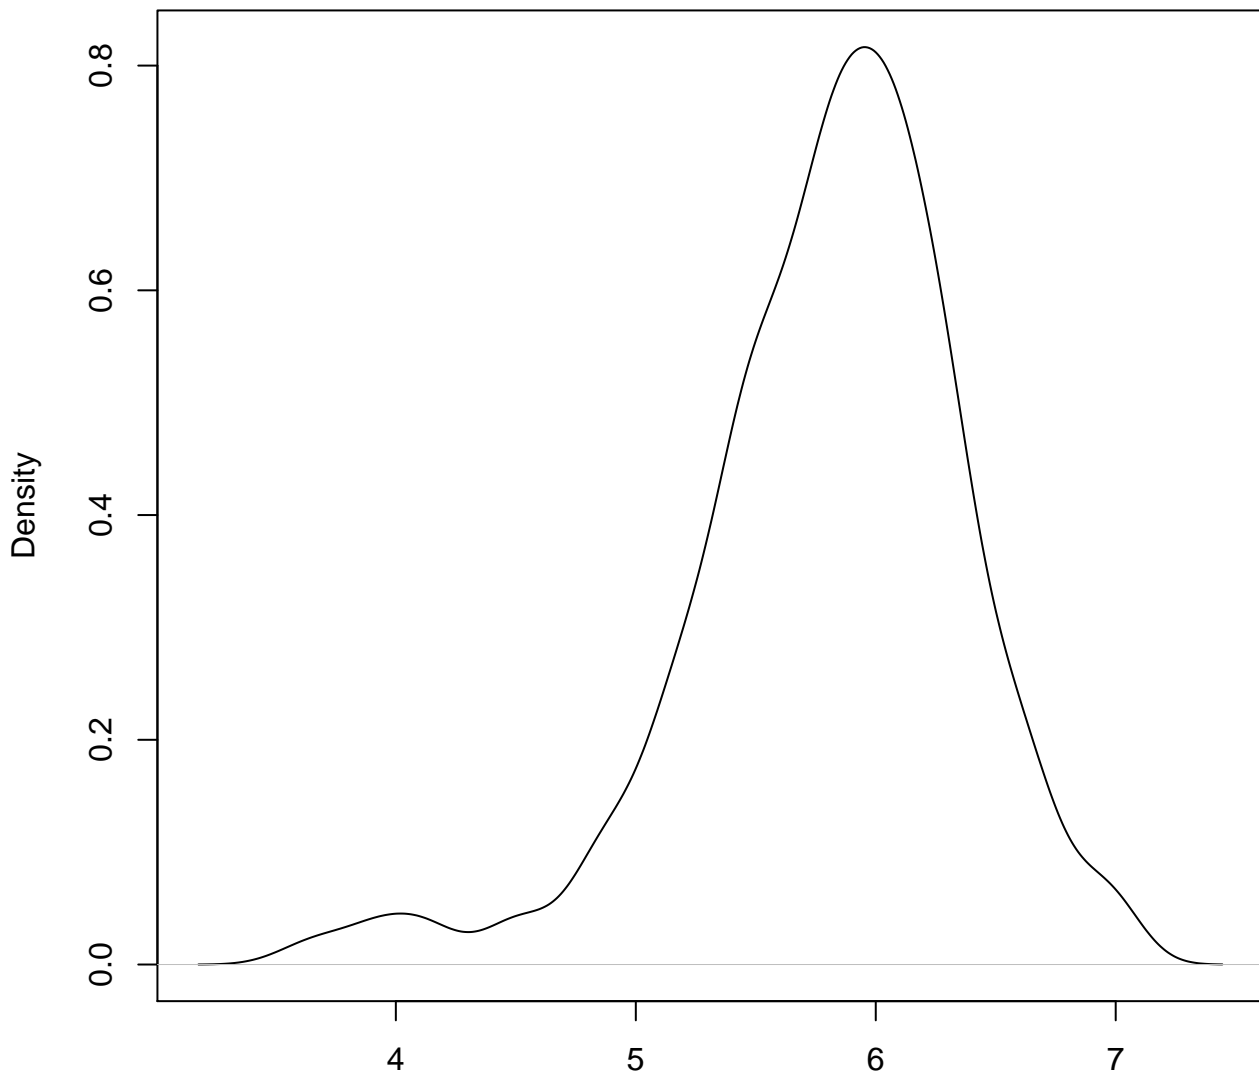

# Pre-adjusted CPA2 distribution

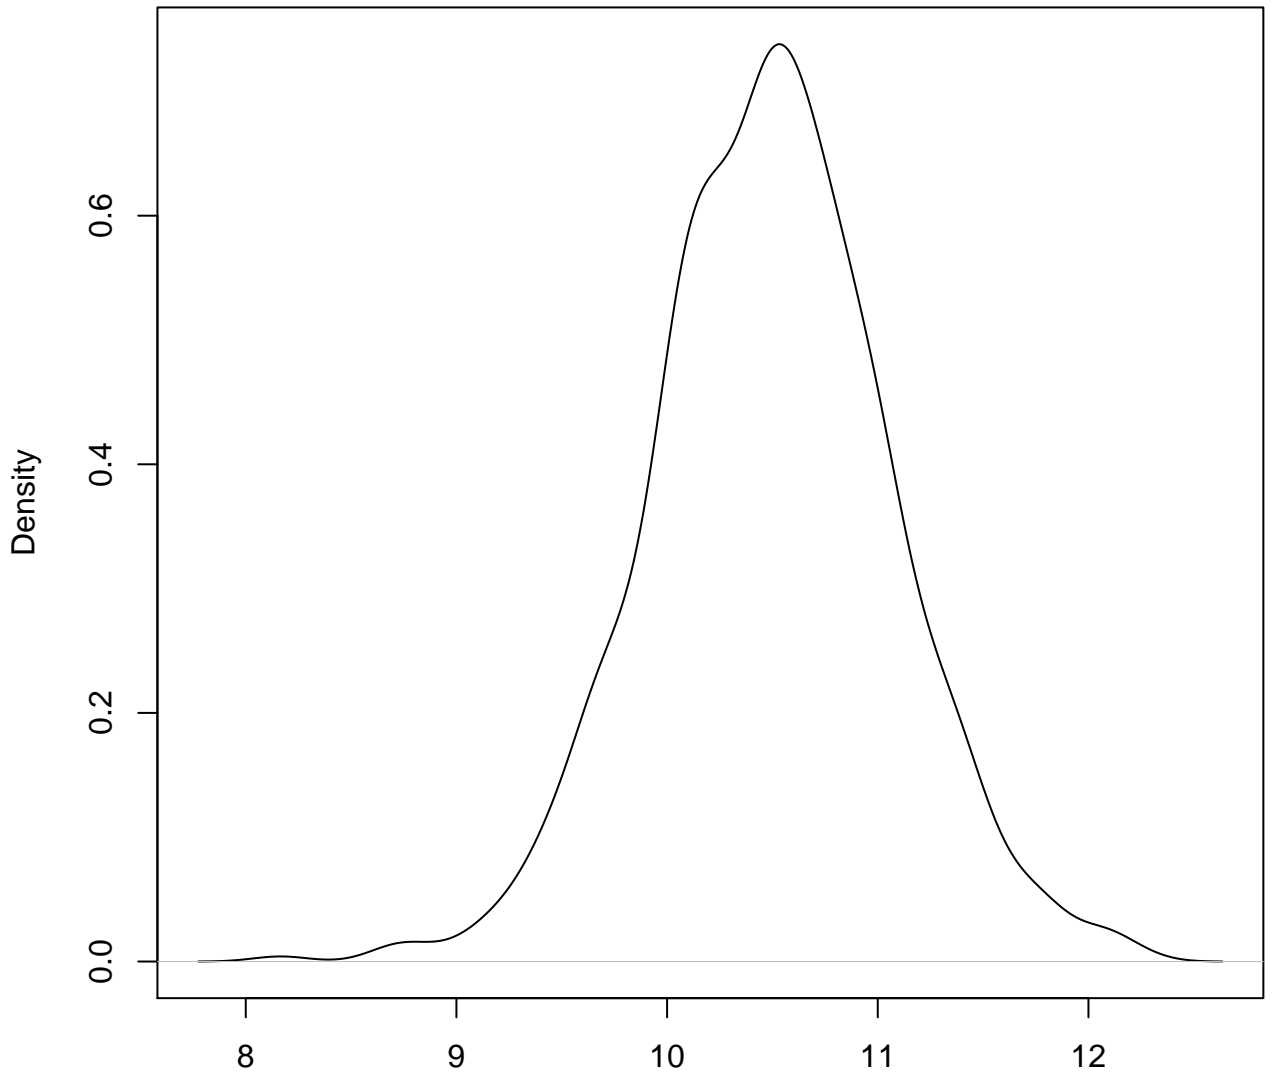

# Pre-adjusted CD38 distribution

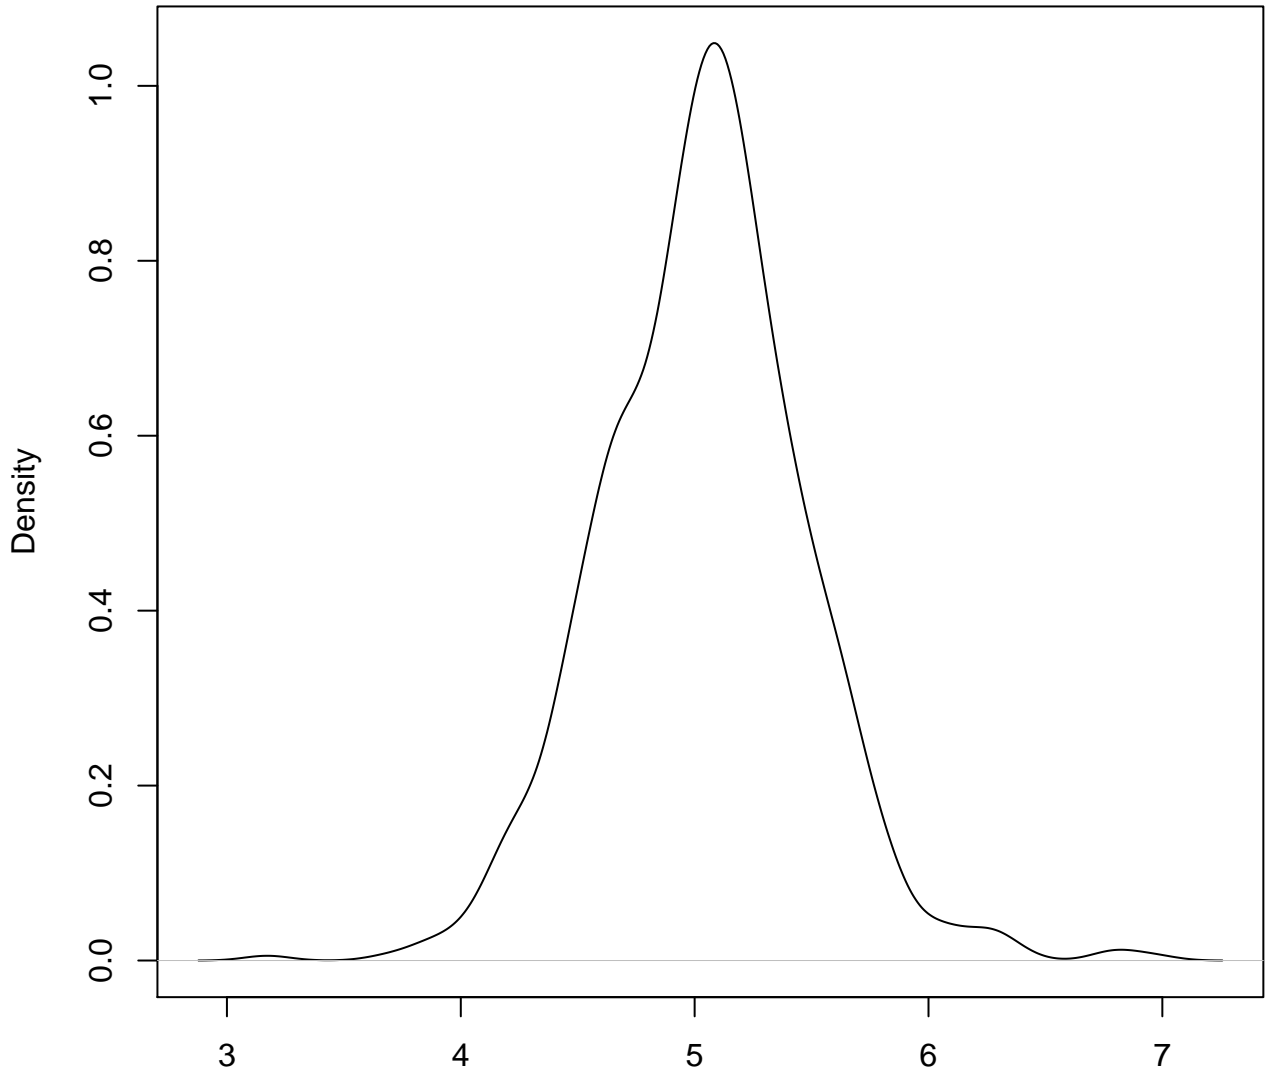

# Pre-adjusted SMPD1 distribution

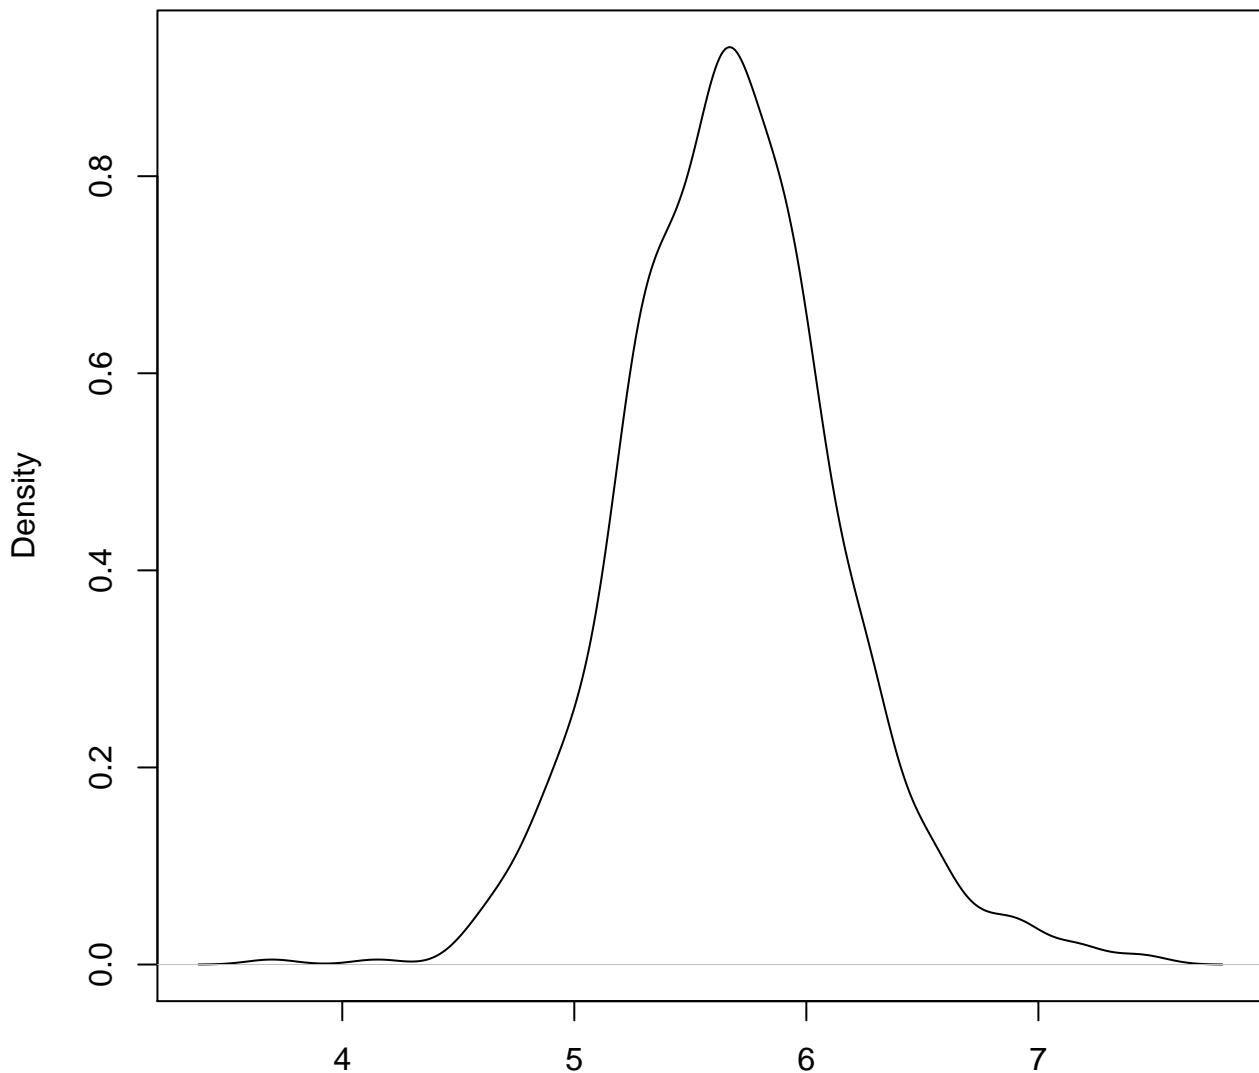

# Pre-adjusted MSR1 distribution

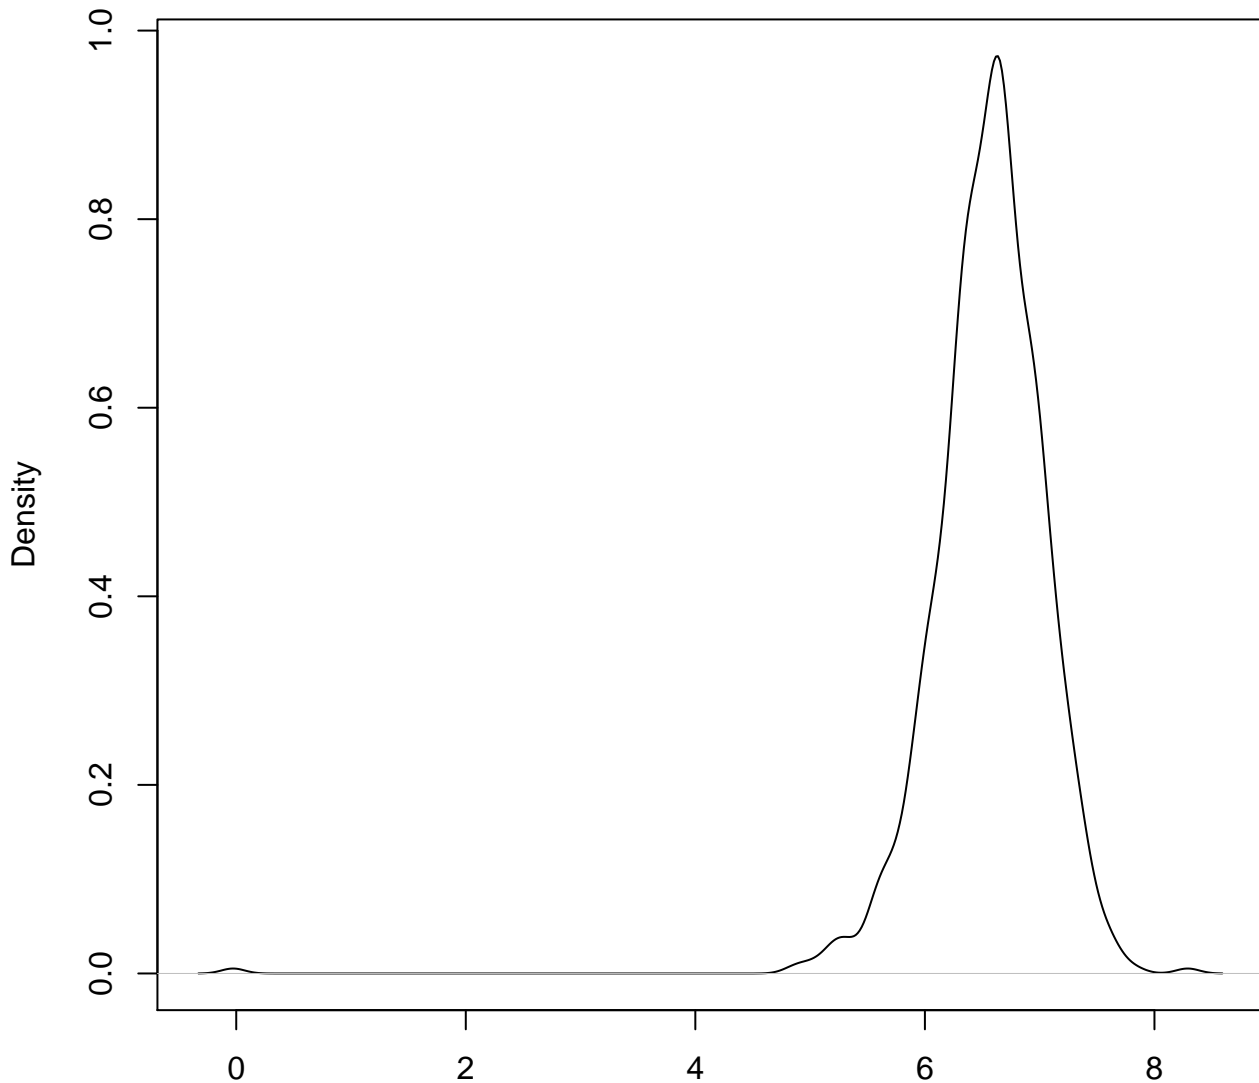



# Pre-adjusted Alpha-2-MRAP distribution

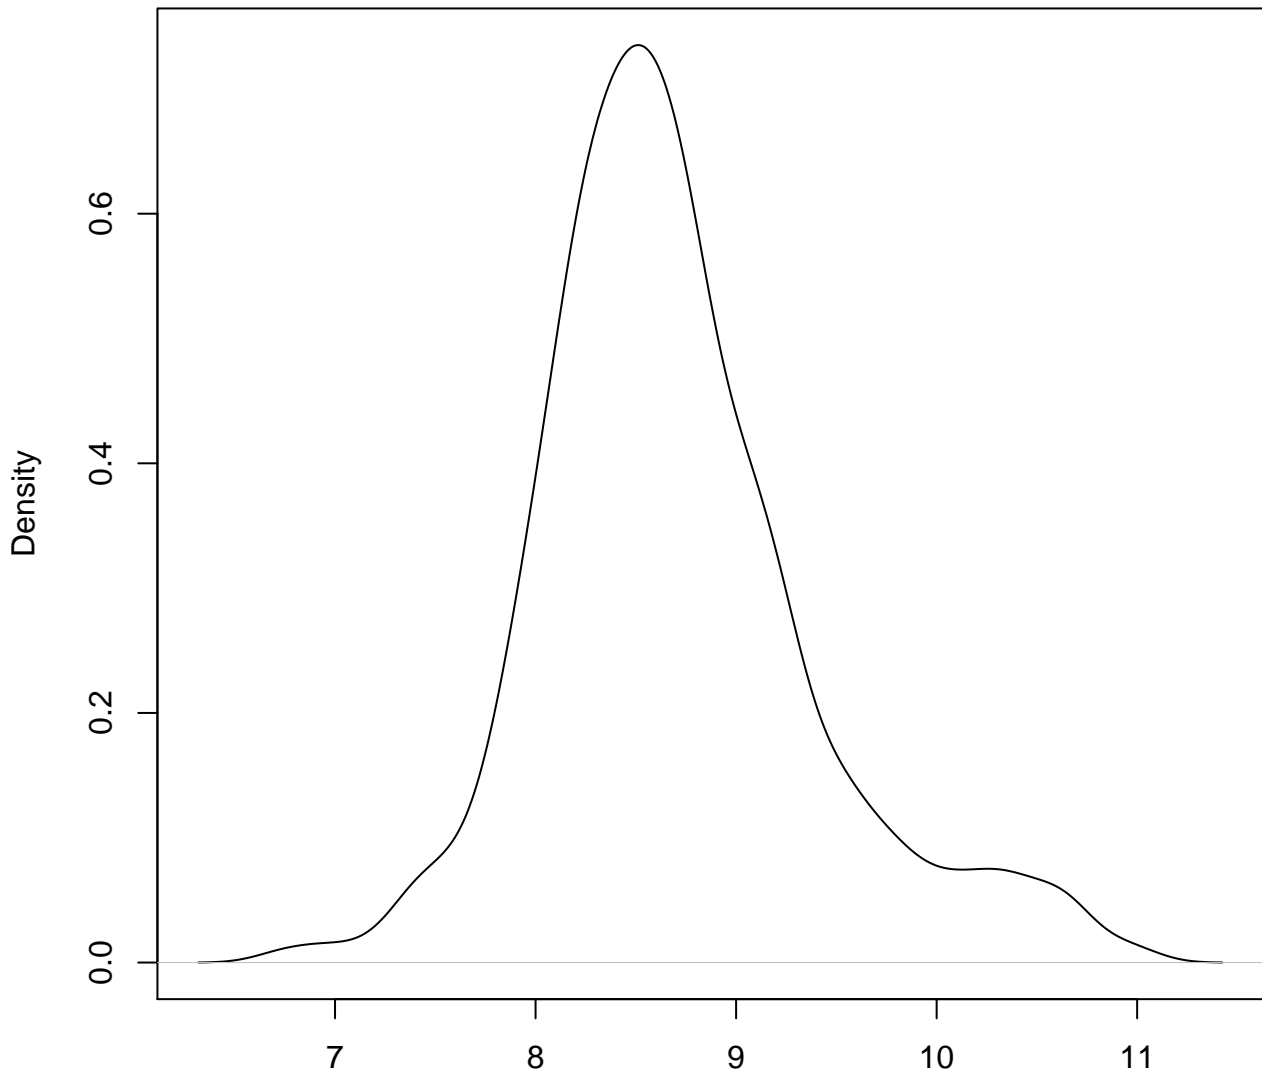

# Pre-adjusted sFRP-3 distribution

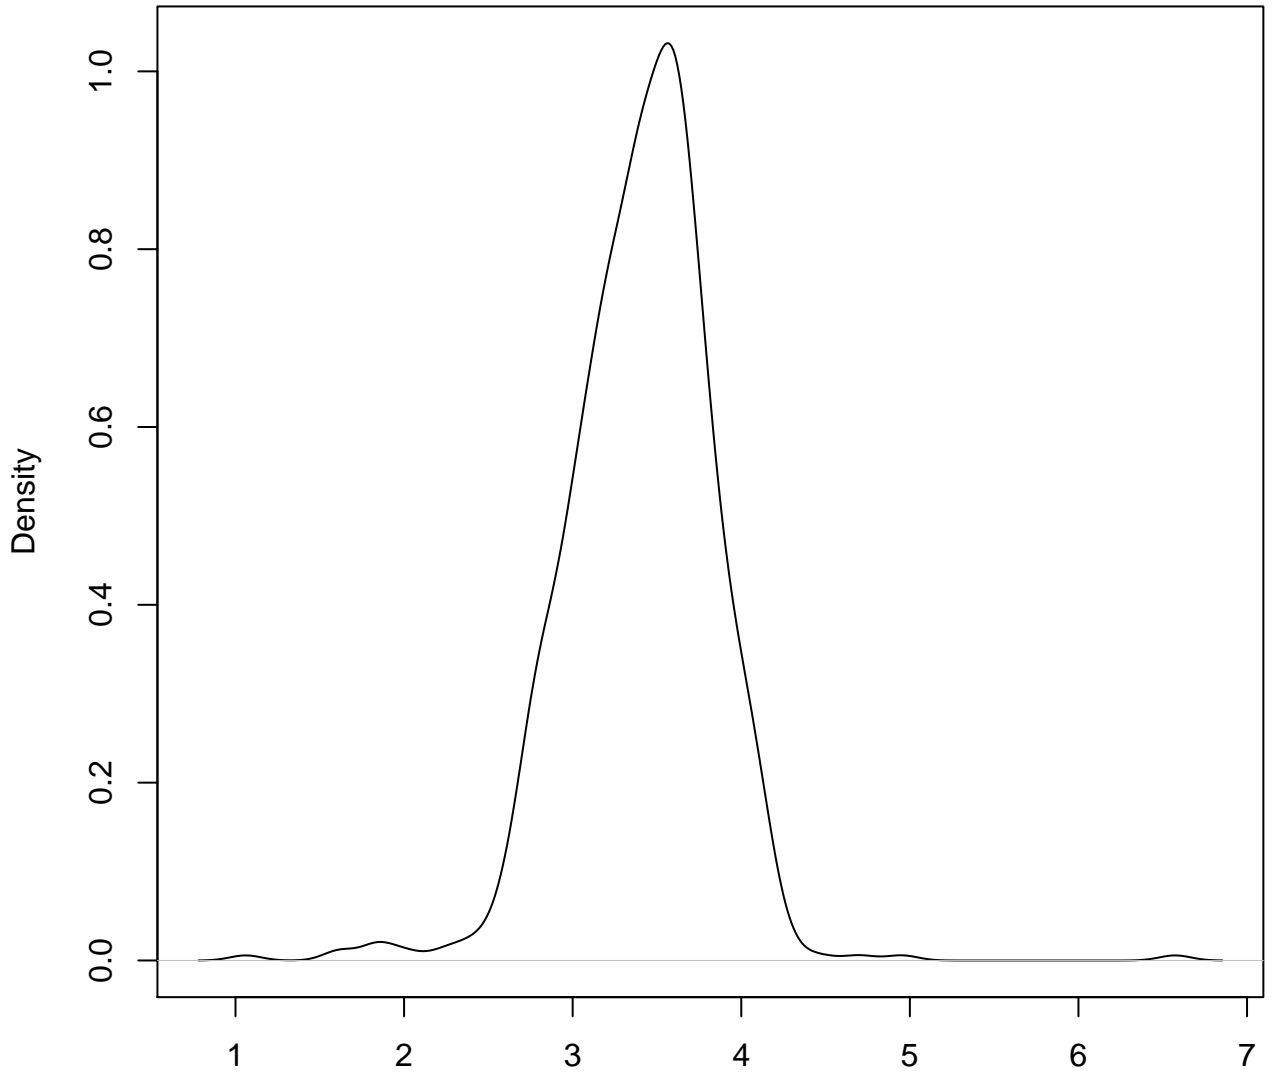

# Pre-adjusted EPHB6 distribution

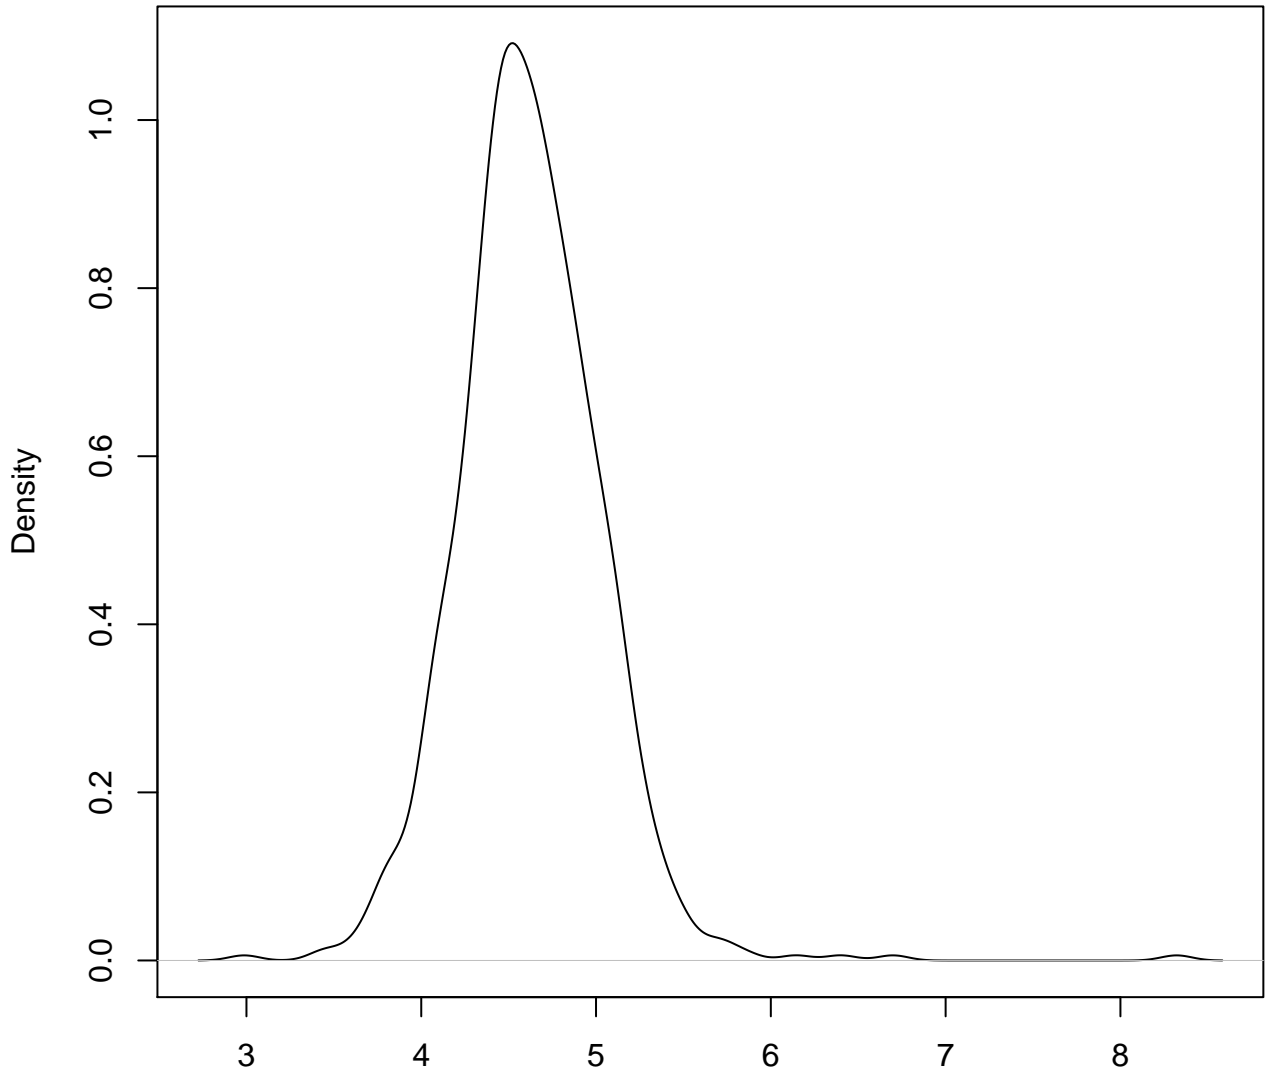

# Pre-adjusted RGMB distribution

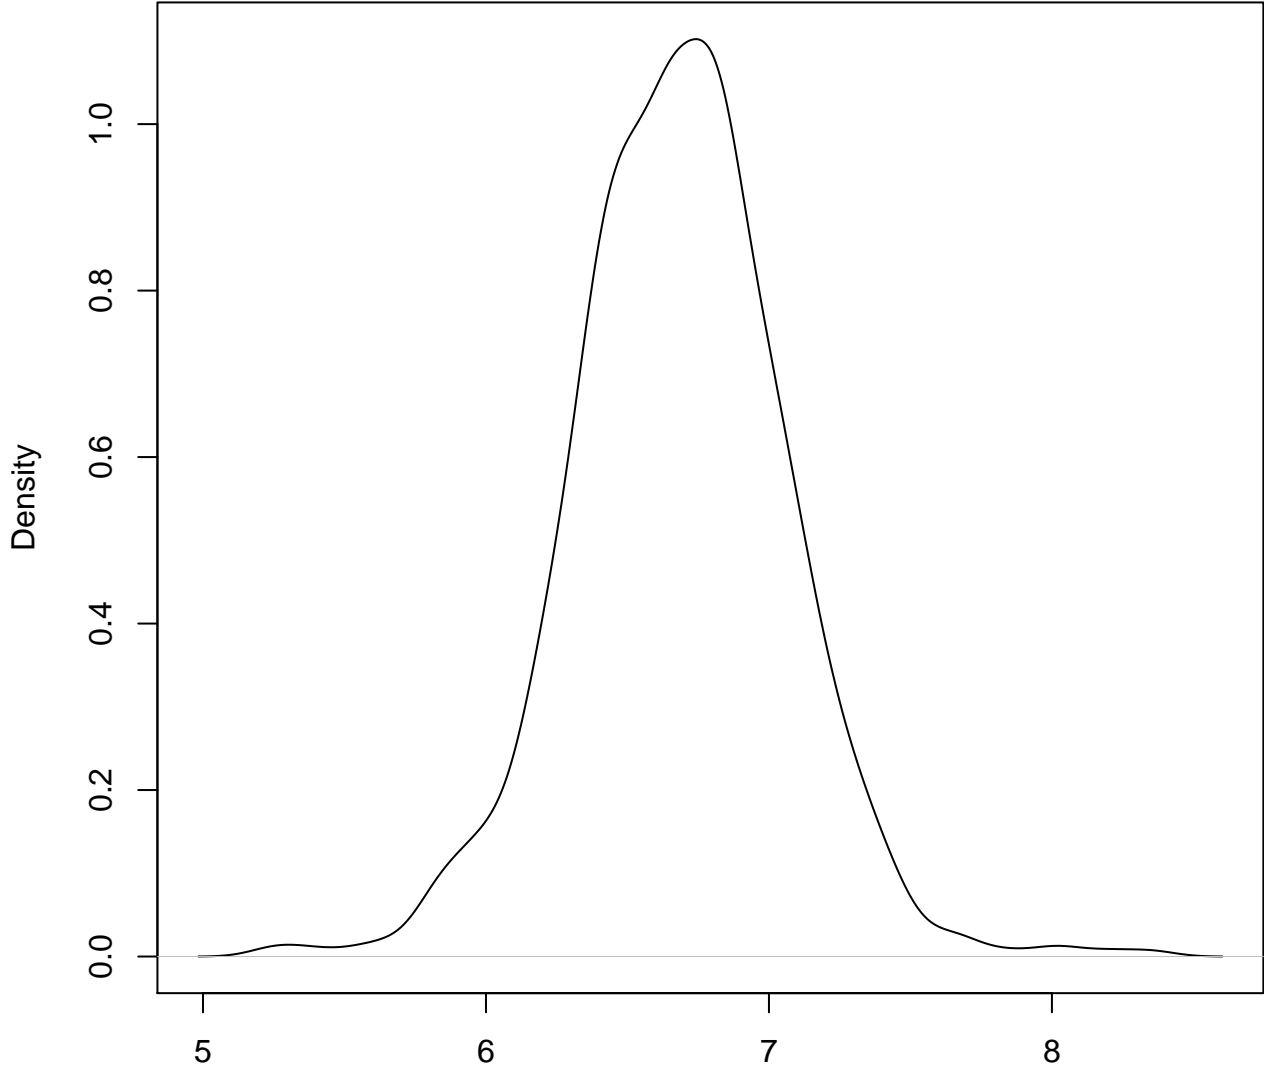

# Pre-adjusted SIGLEC1 distribution

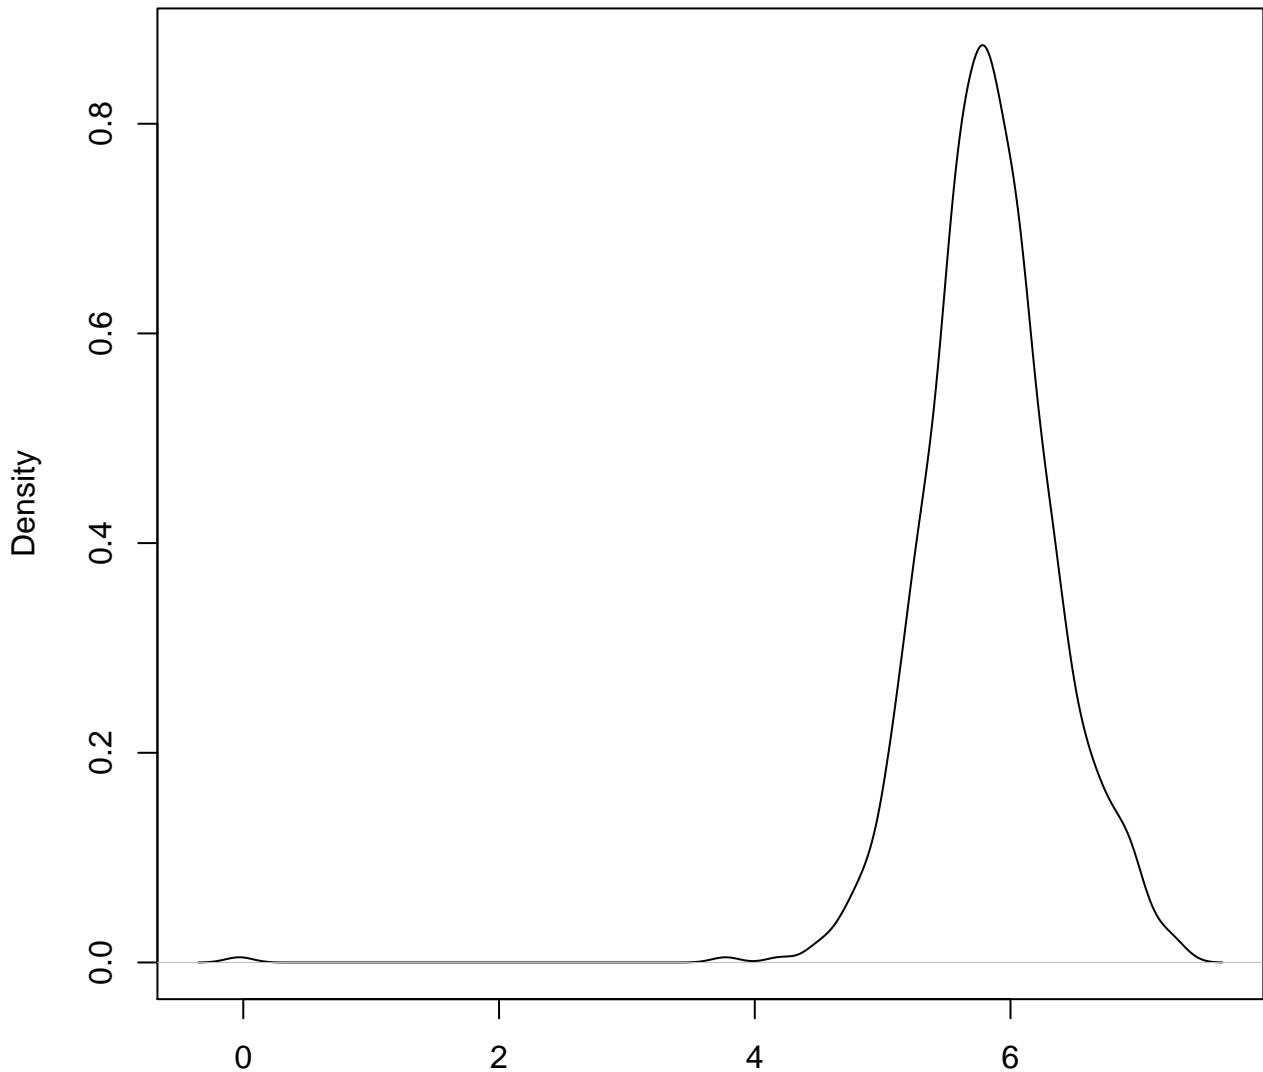

# Pre-adjusted CNTN5 distribution

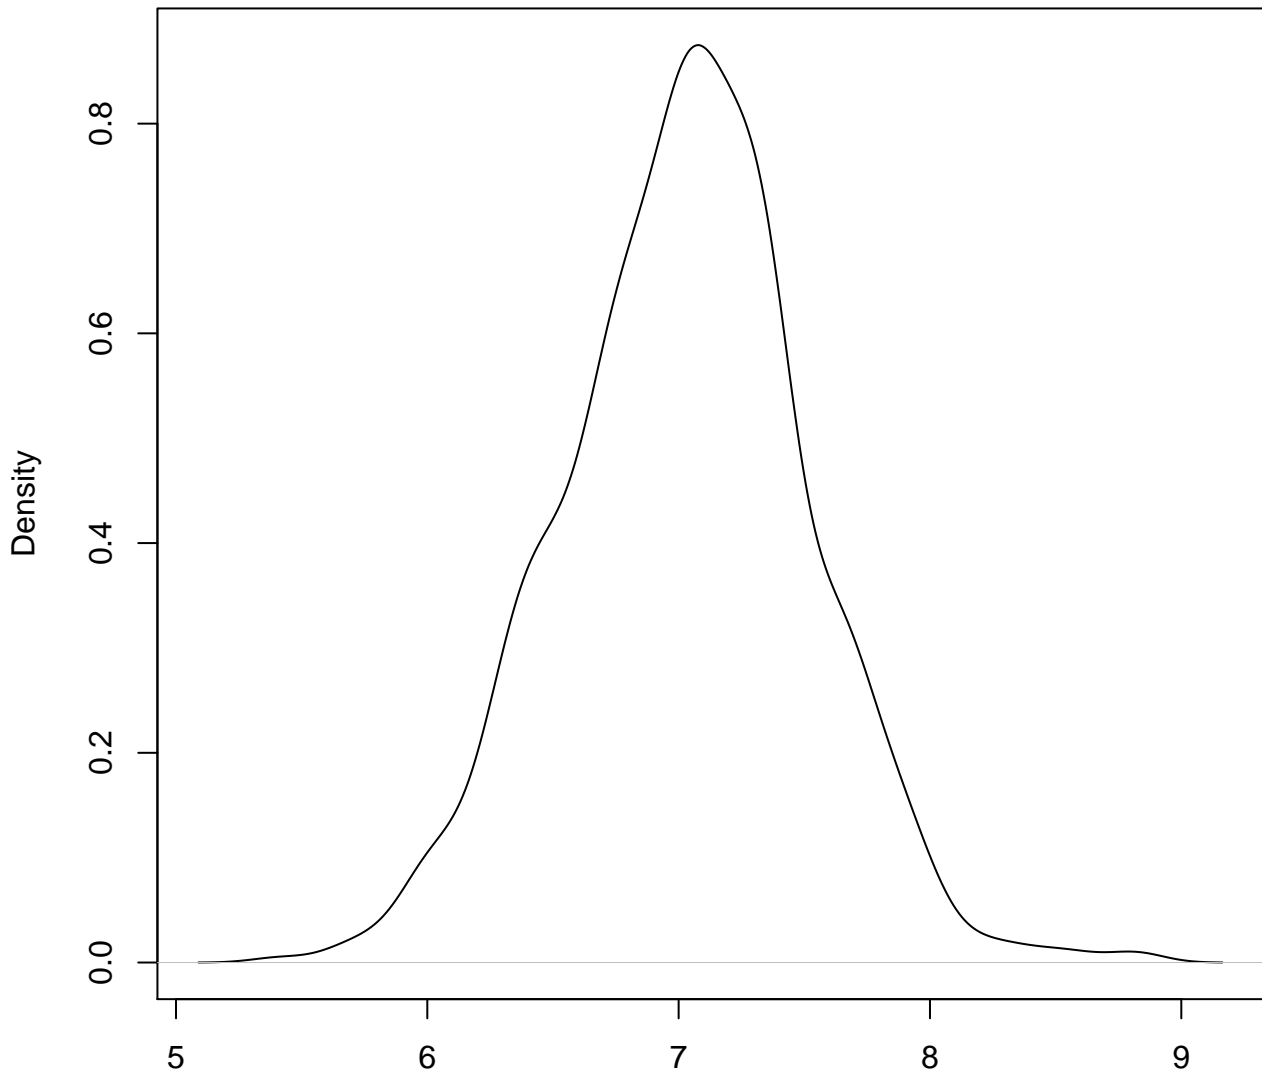

# Pre-adjusted ADAM 22 distribution

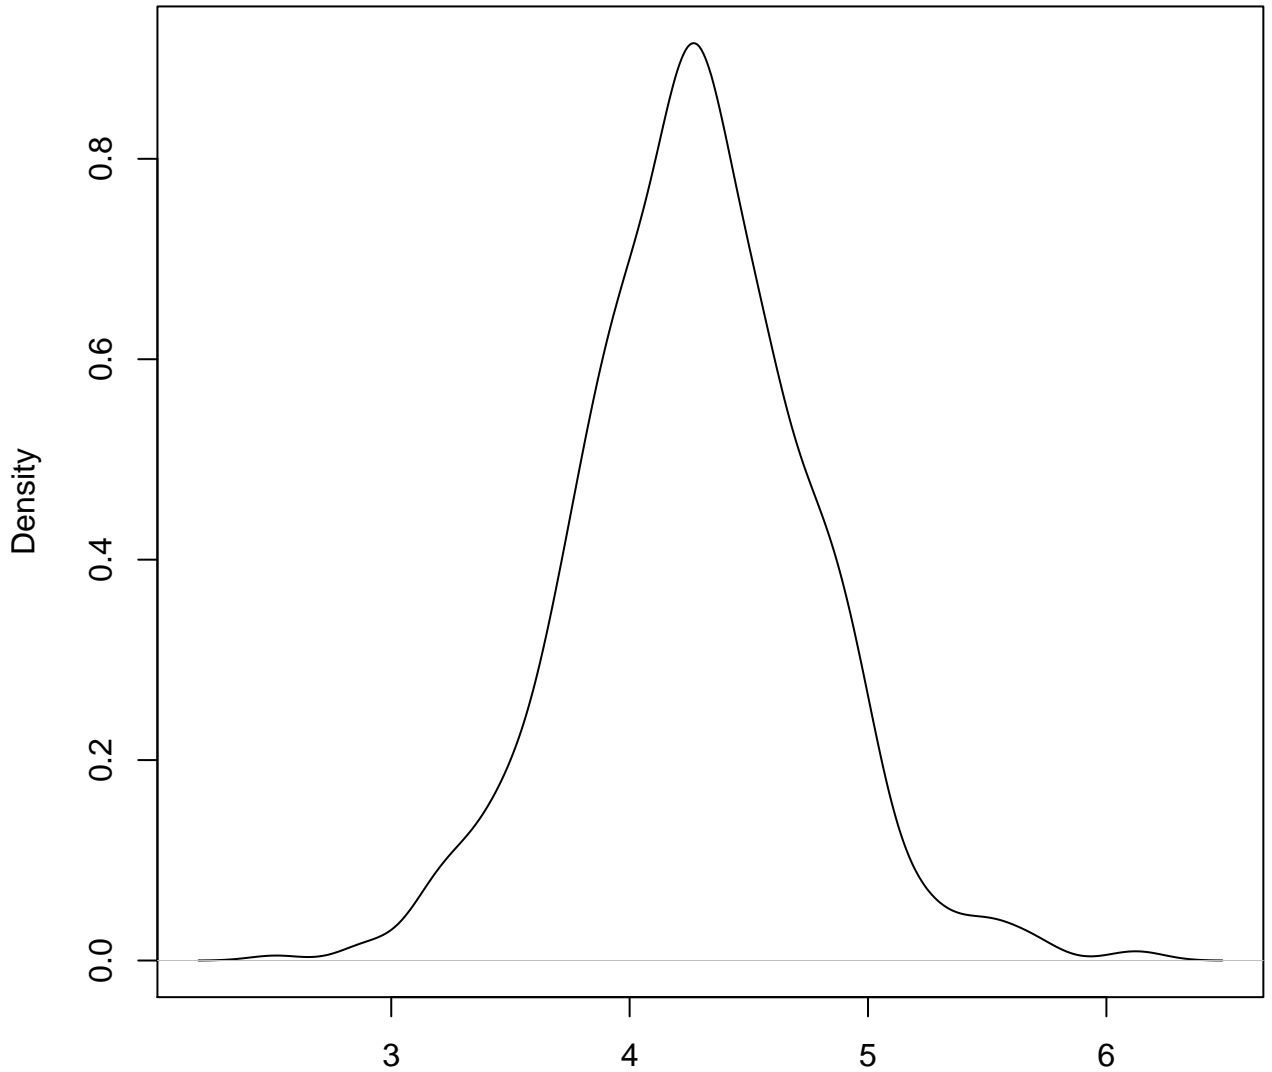

# Pre-adjusted CLEC1B distribution

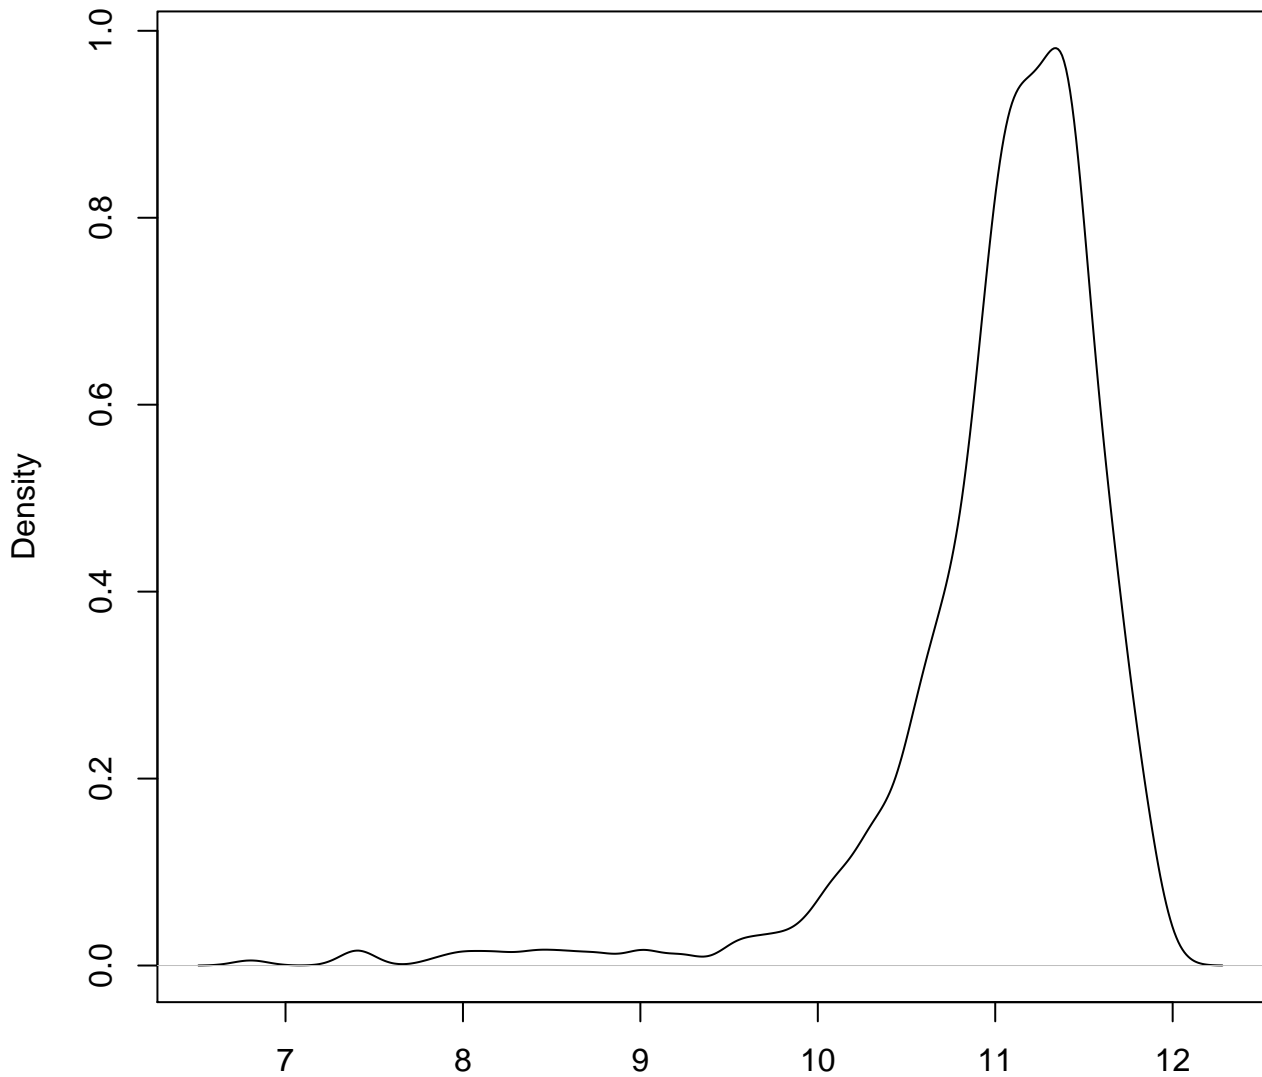



# Pre-adjusted ADAM 23 distribution

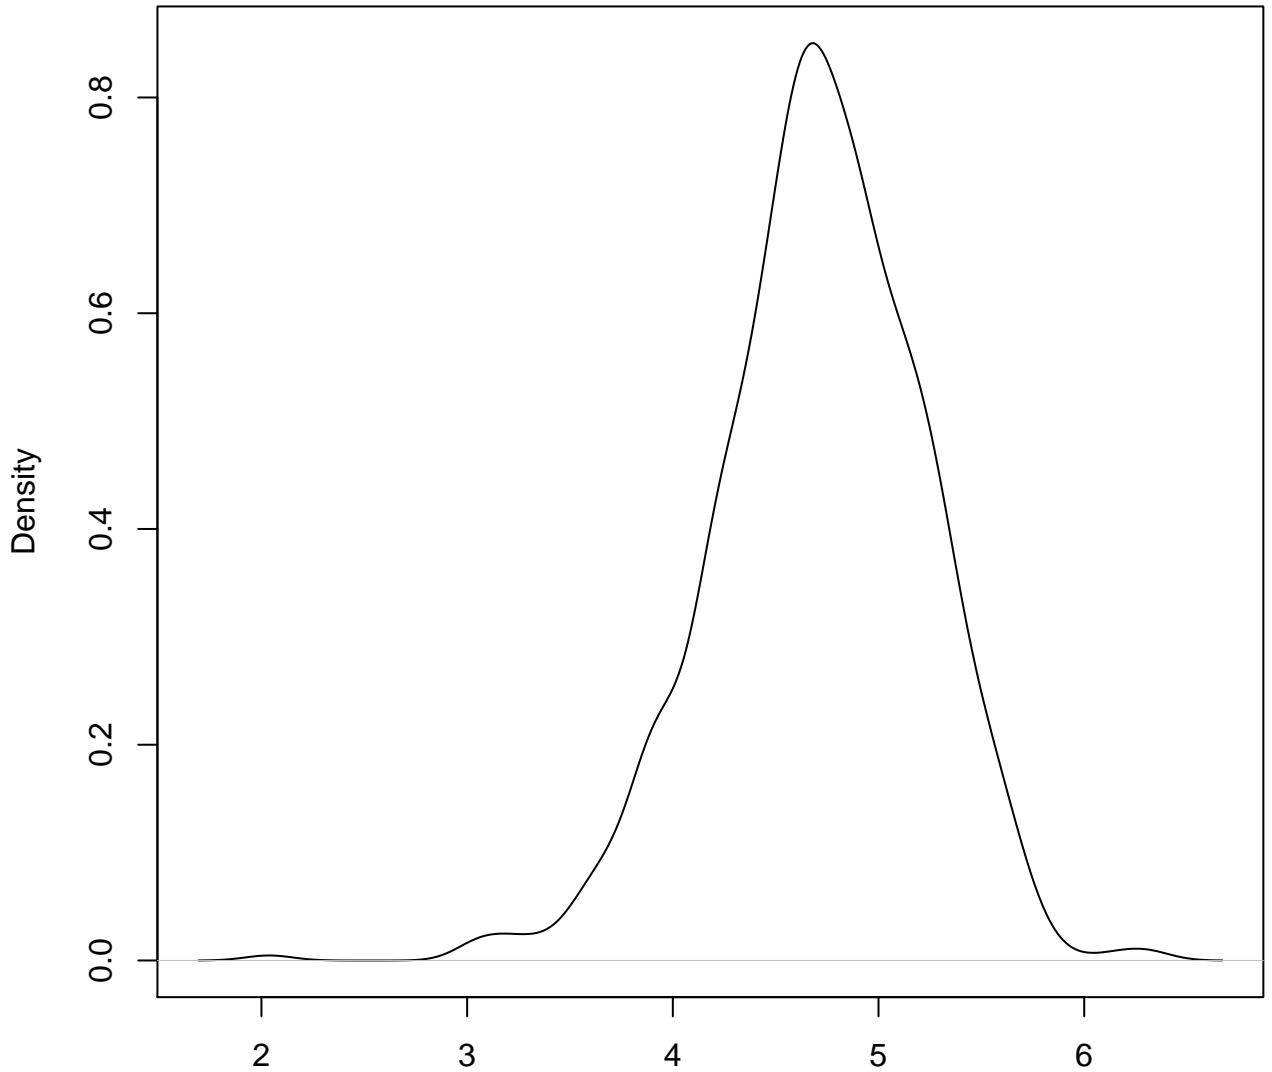

# Pre-adjusted MATN3 distribution

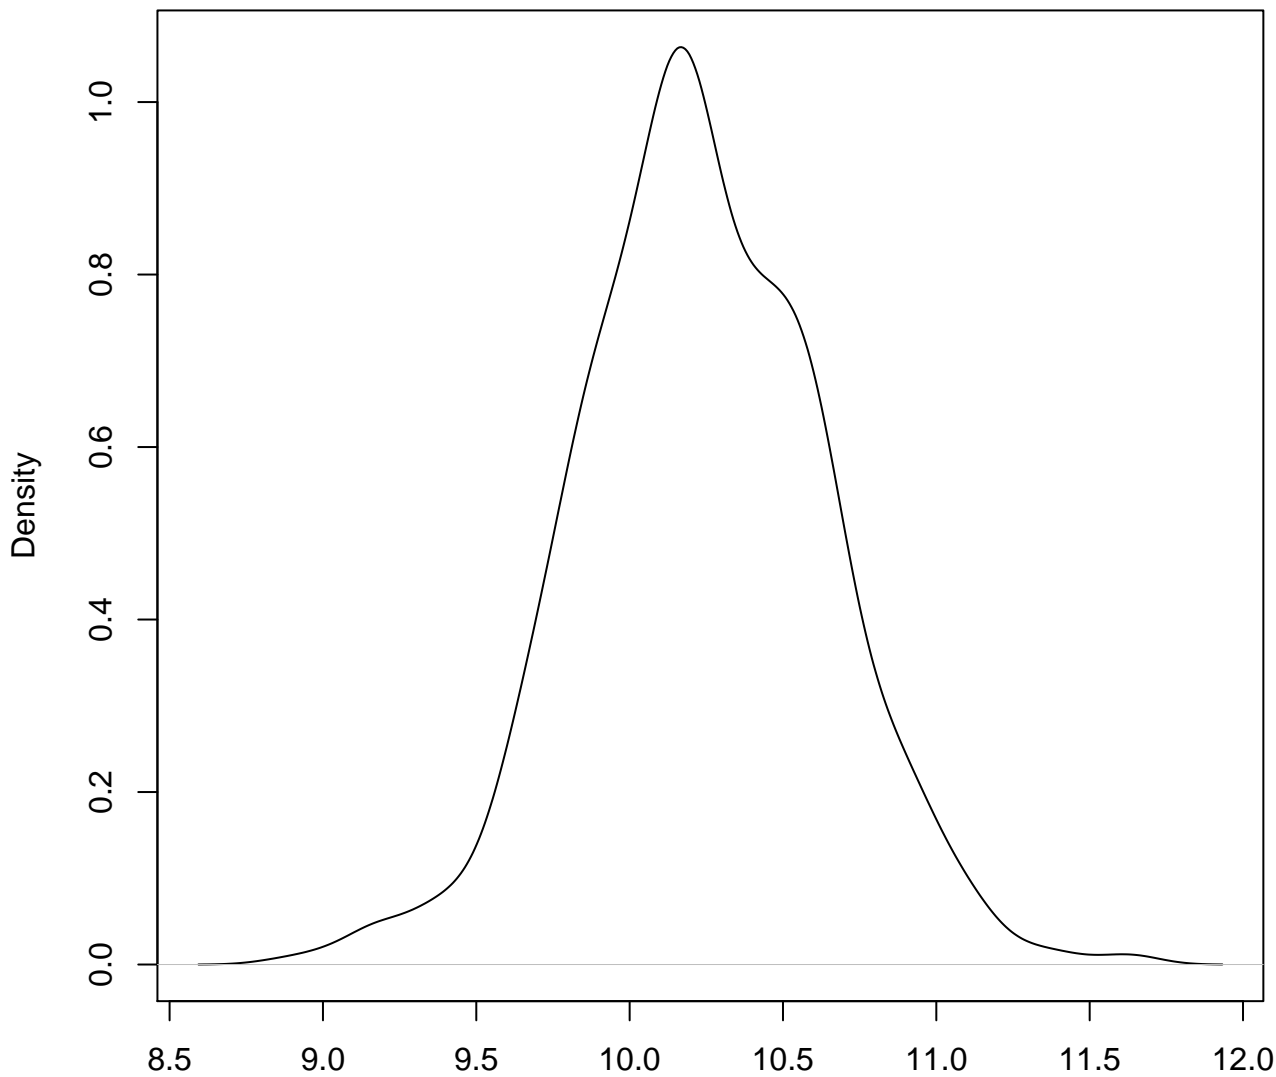

# Pre-adjusted RSP01 distribution

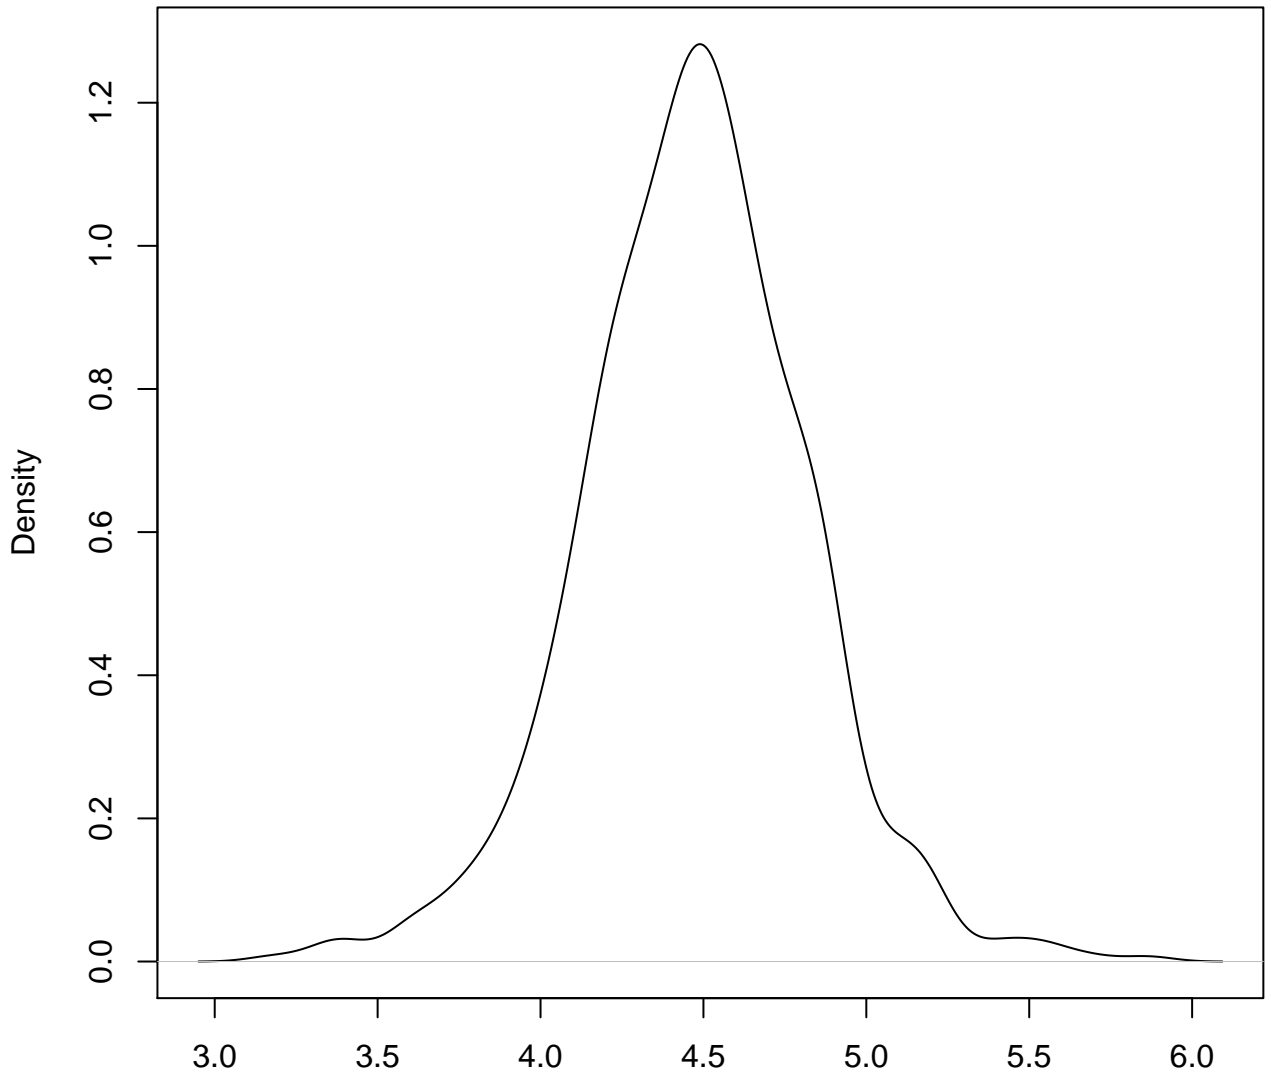

# Pre-adjusted HAGH distribution

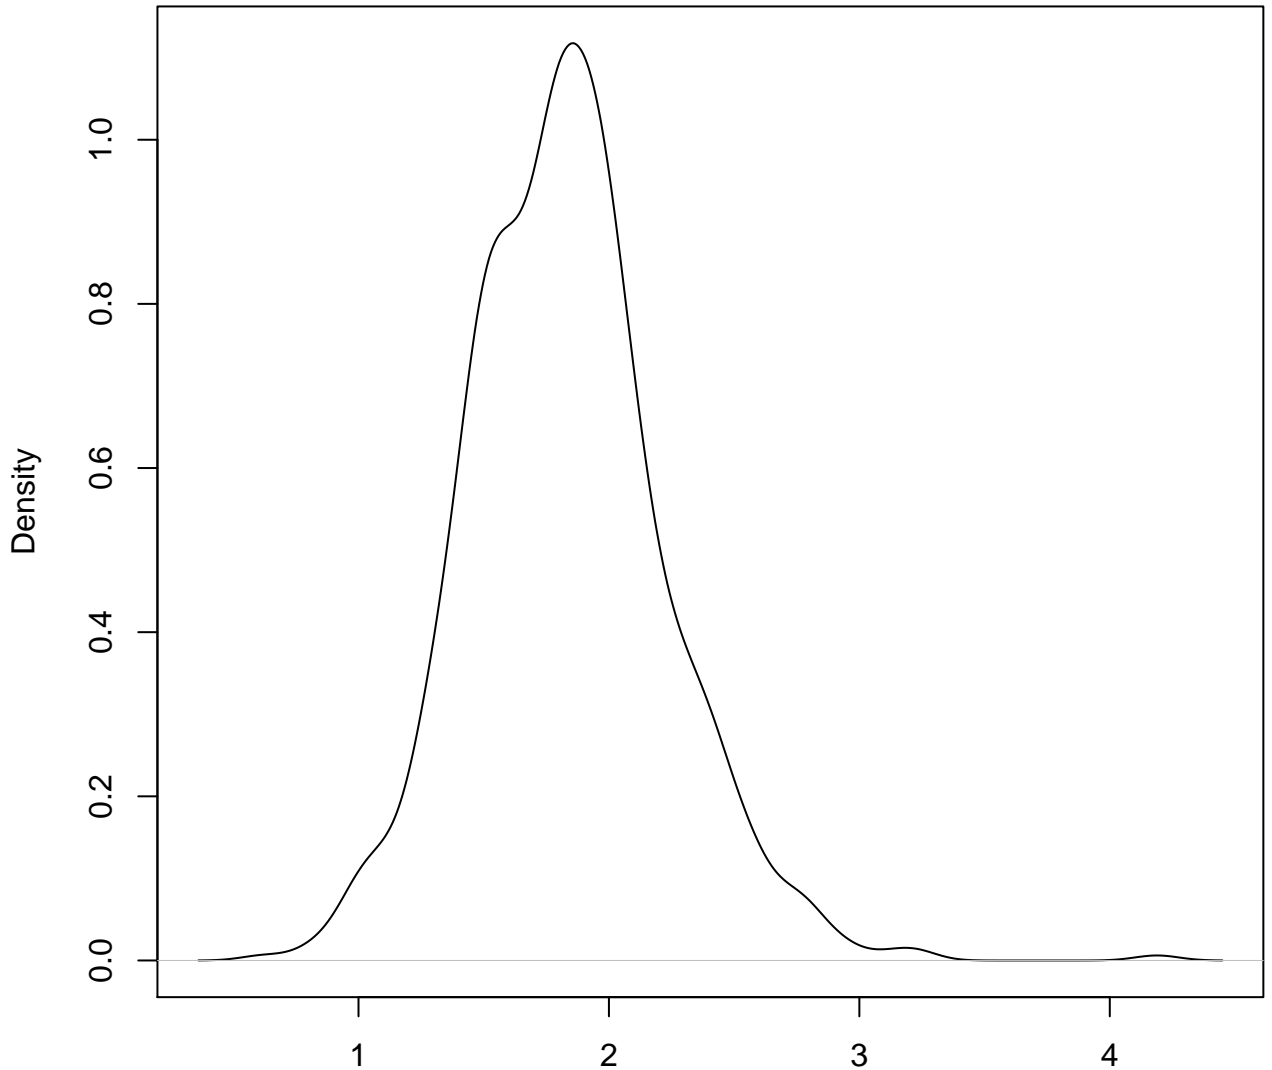

# Pre-adjusted LXN distribution

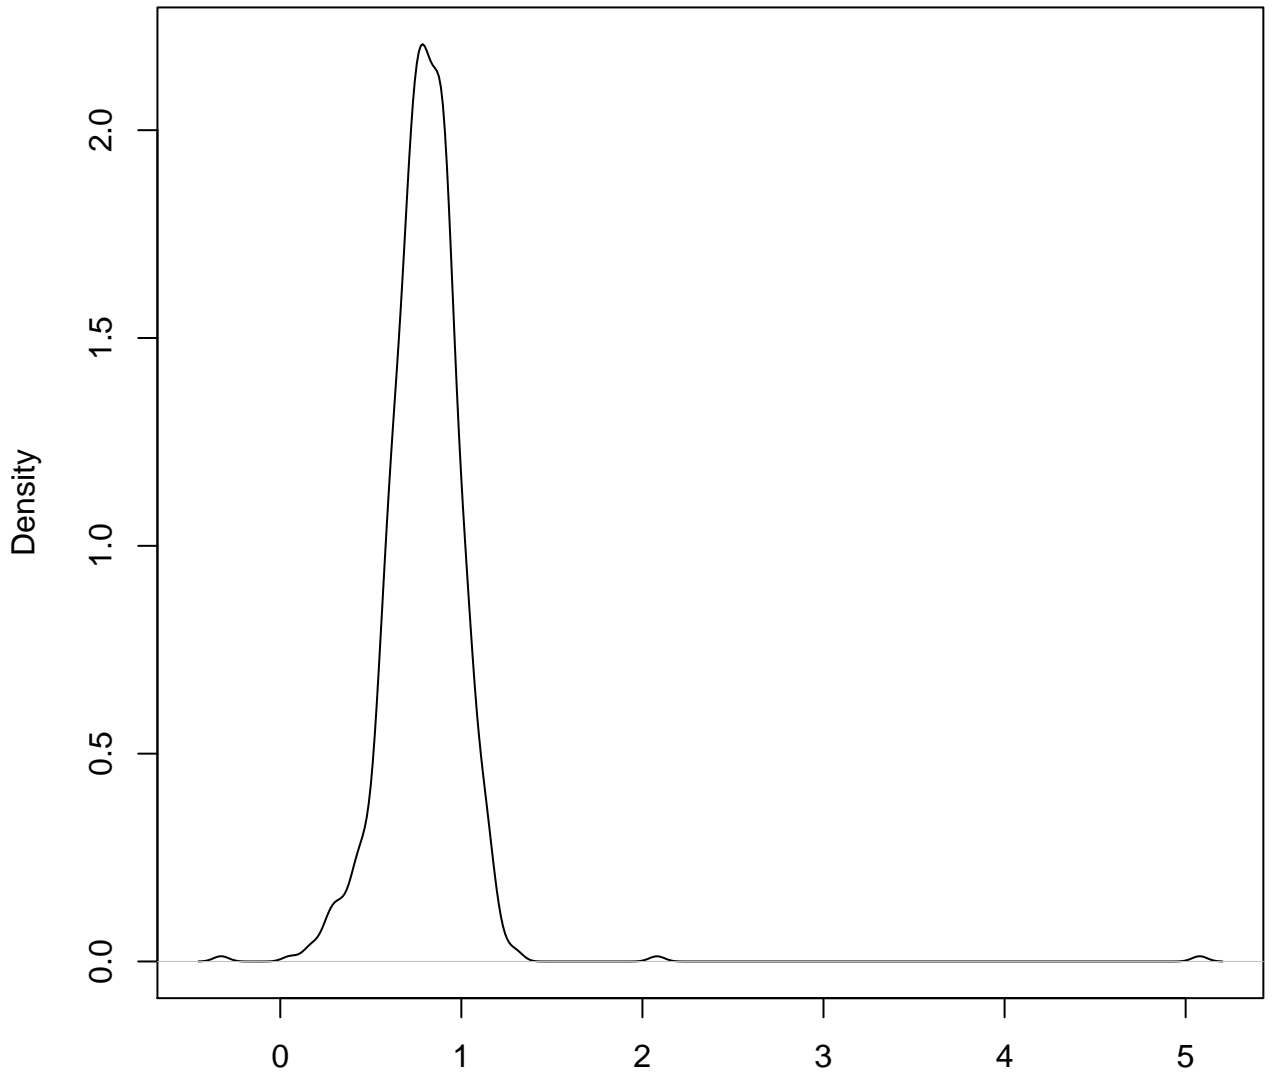

# Pre-adjusted gal-8 distribution

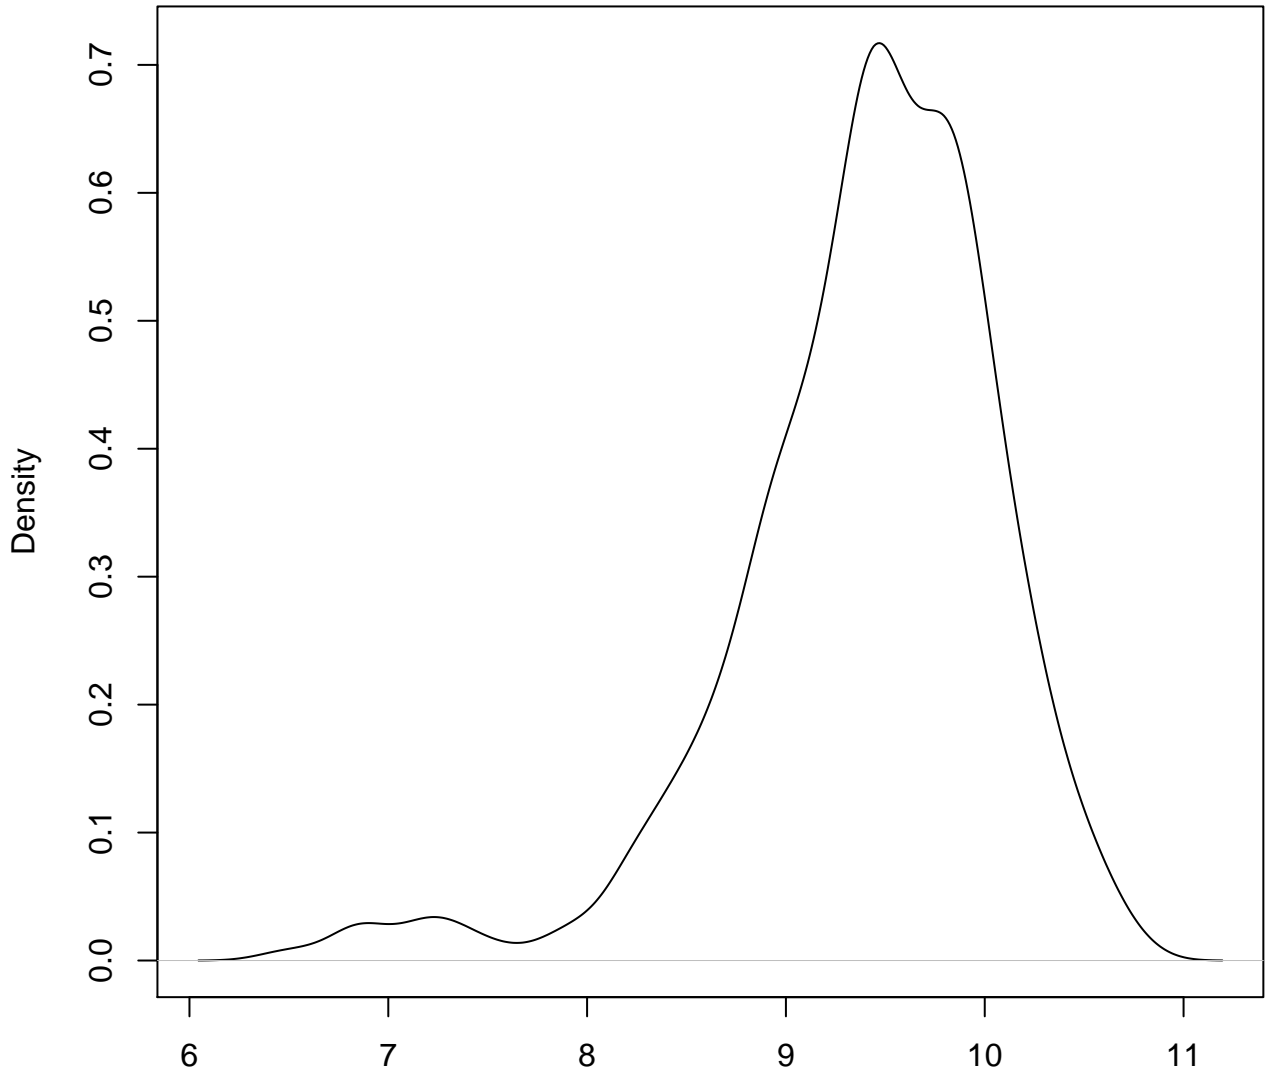

# Pre-adjusted BCAN distribution

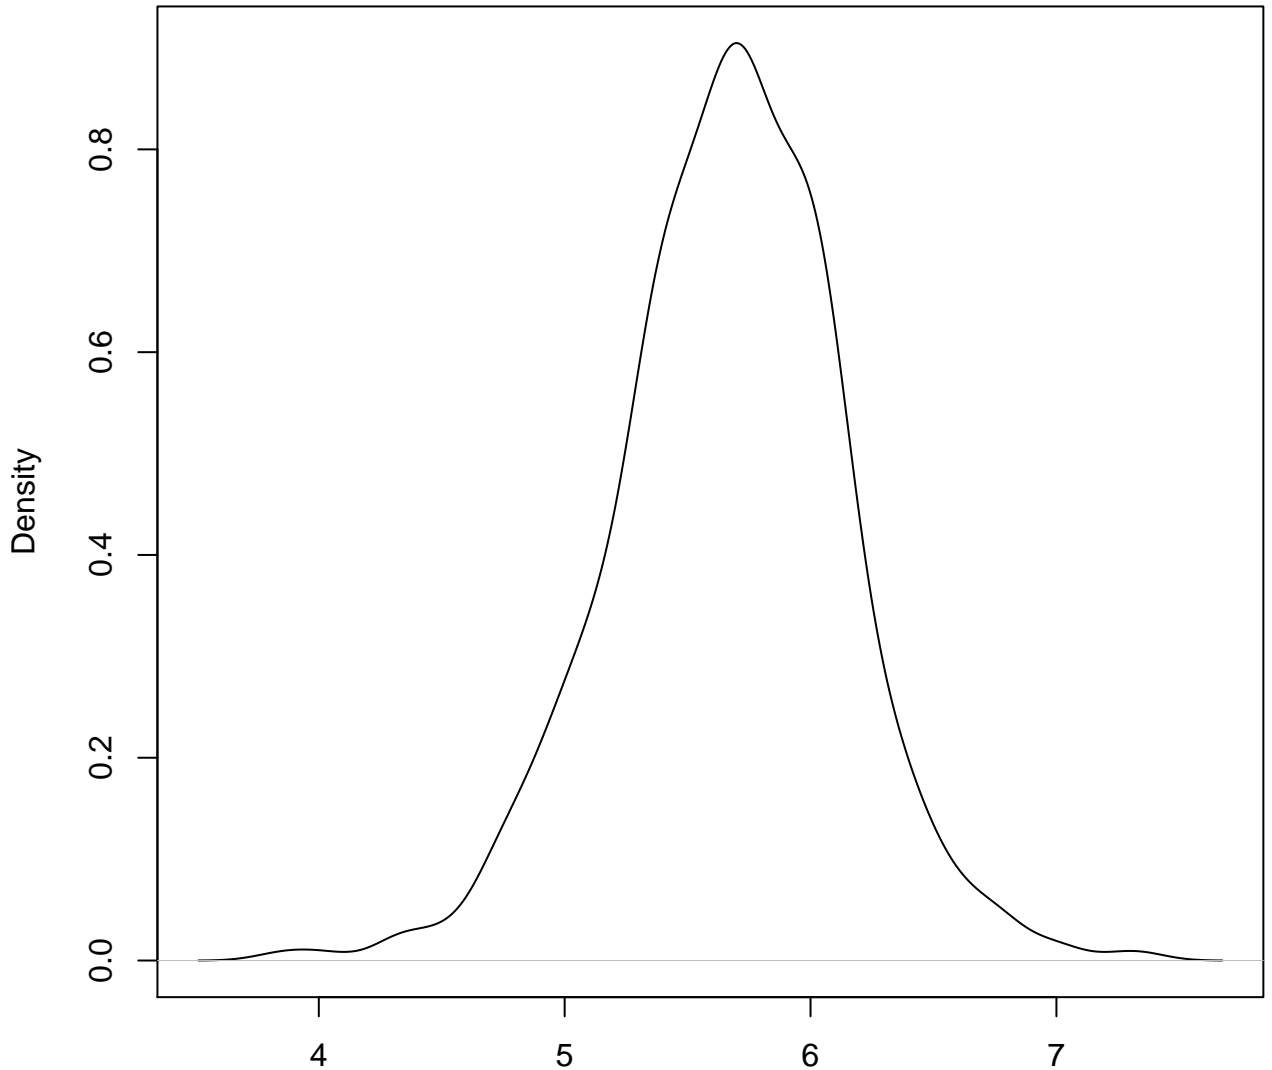

# Pre-adjusted LAYN distribution

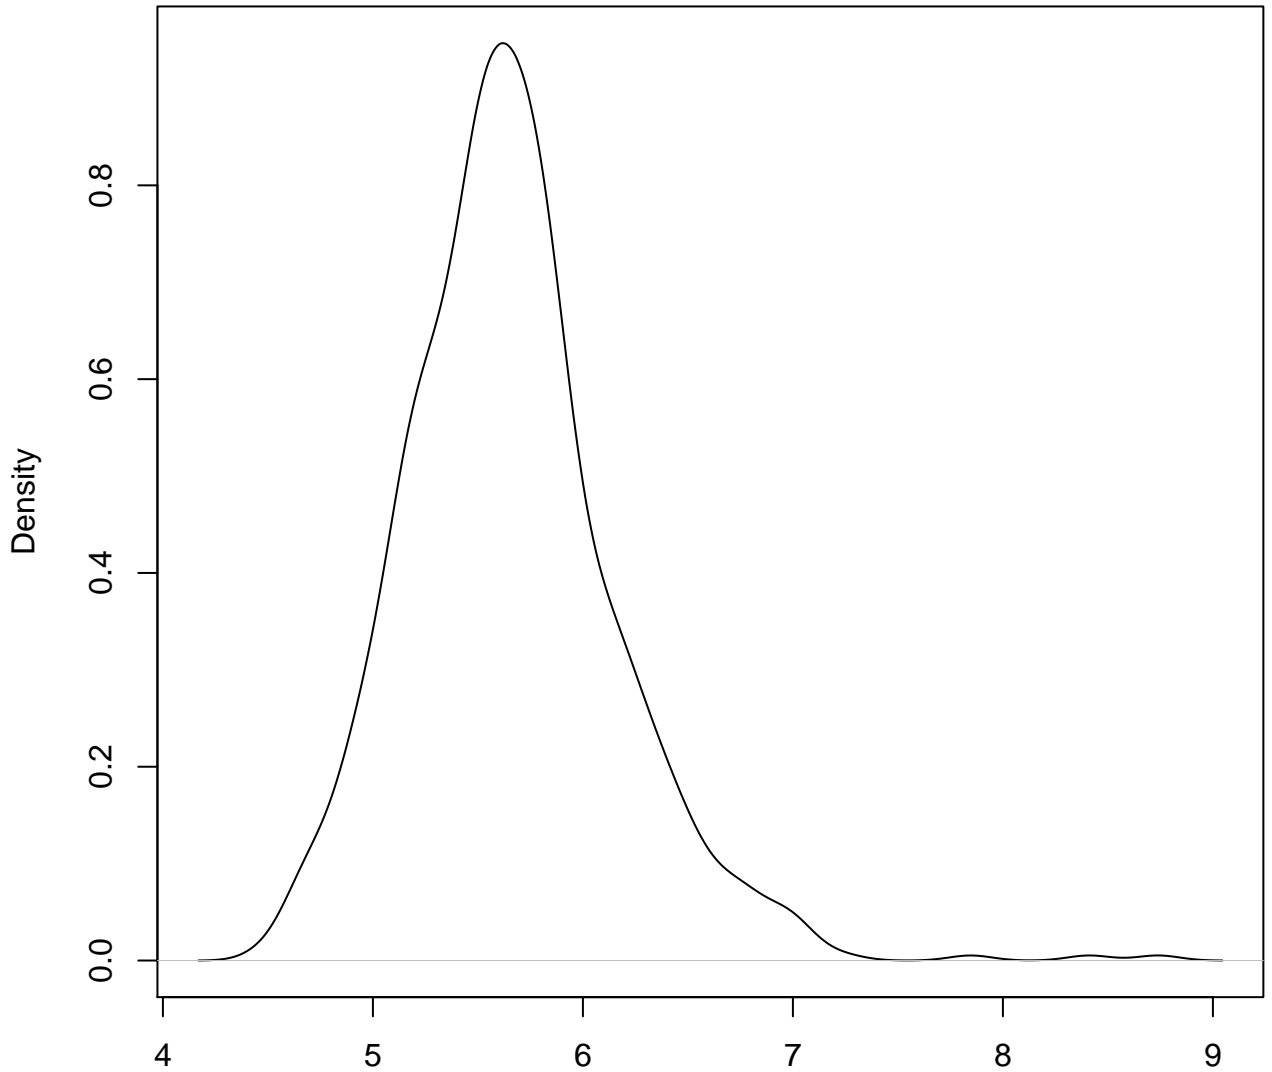



# Pre-adjusted NEP distribution

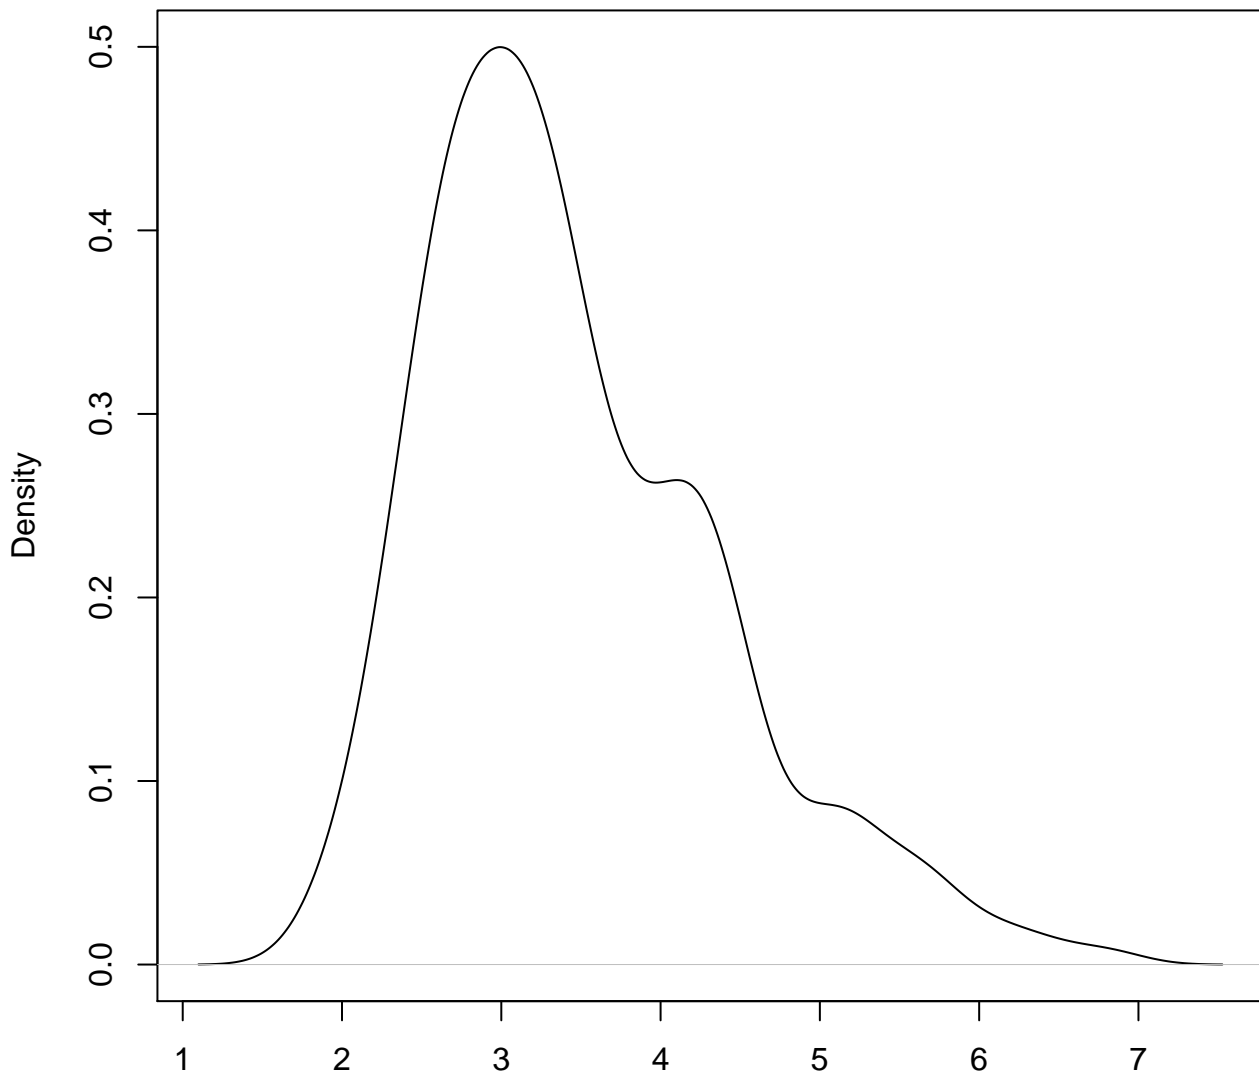

# Pre-adjusted GDF-8 distribution

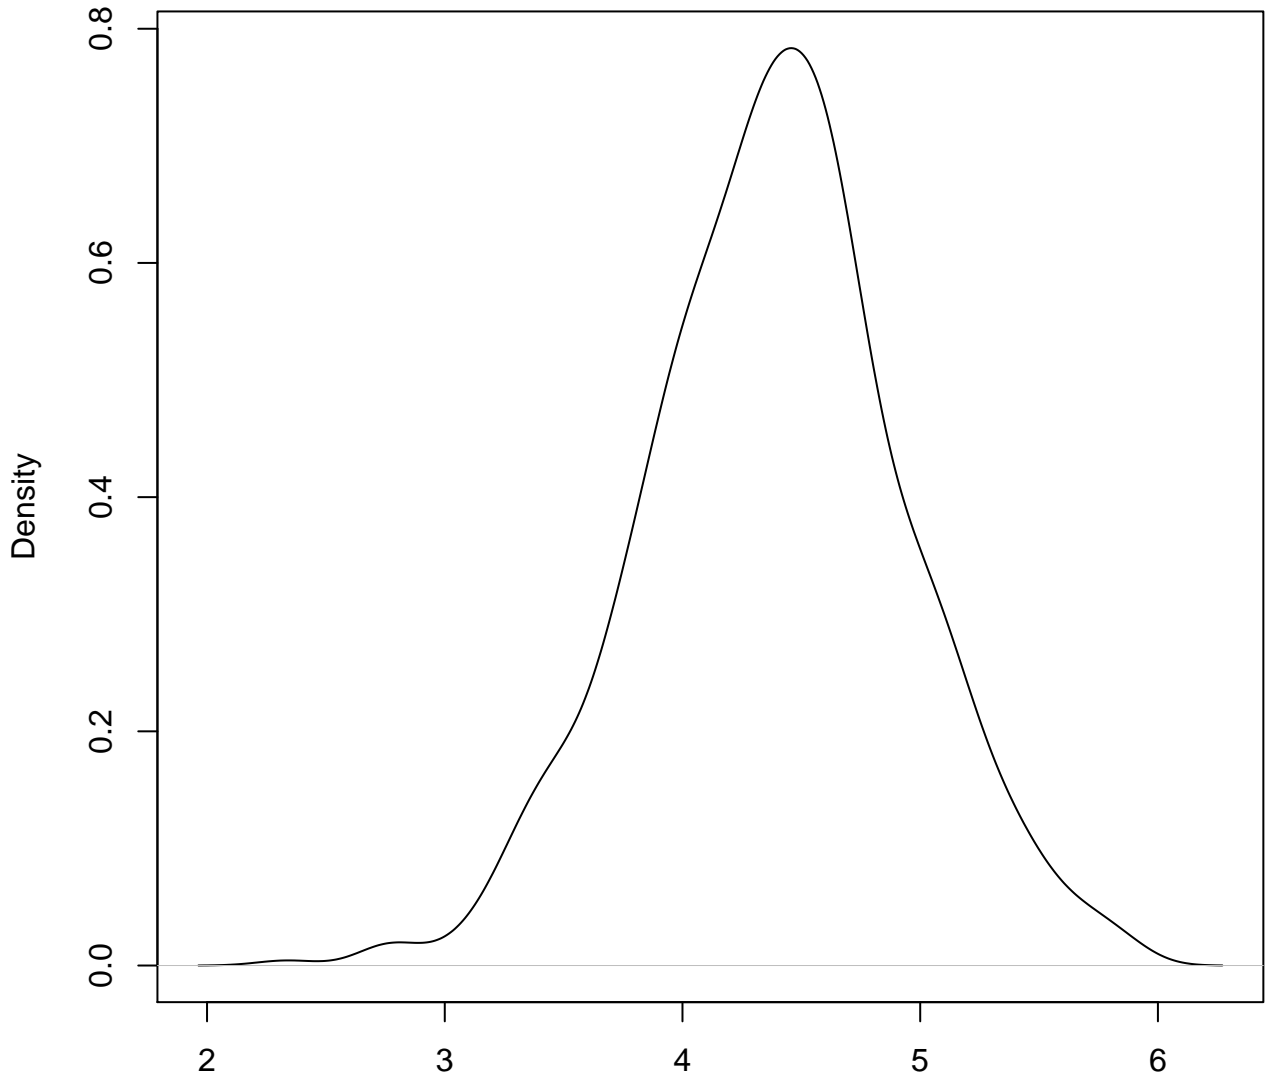

# Pre-adjusted THY 1 distribution

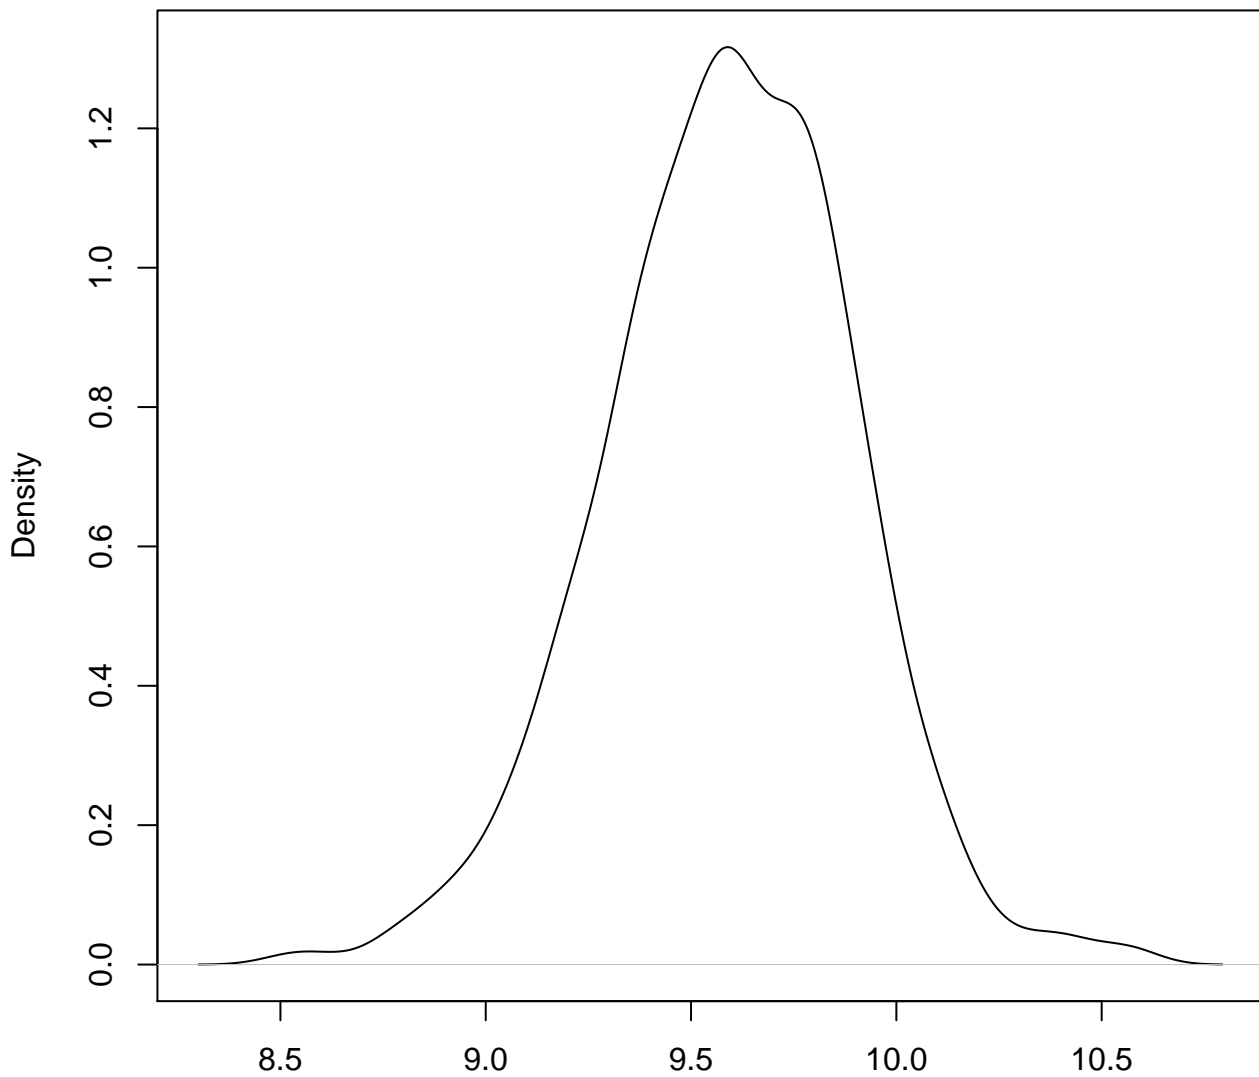

# Pre-adjusted WFIKKN1 distribution

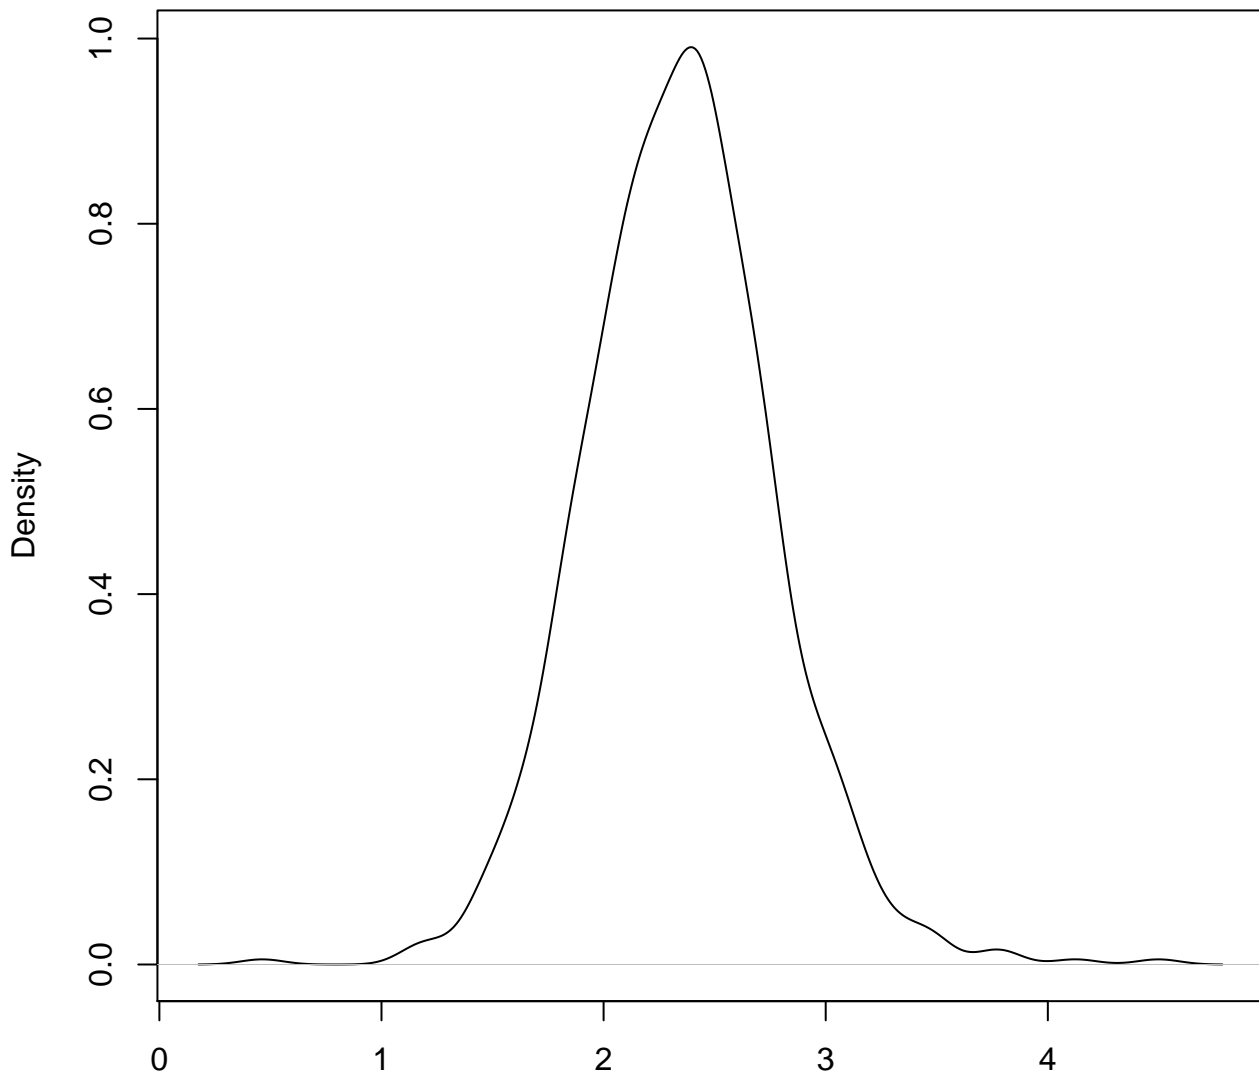

# Pre-adjusted Tmprss5 distribution

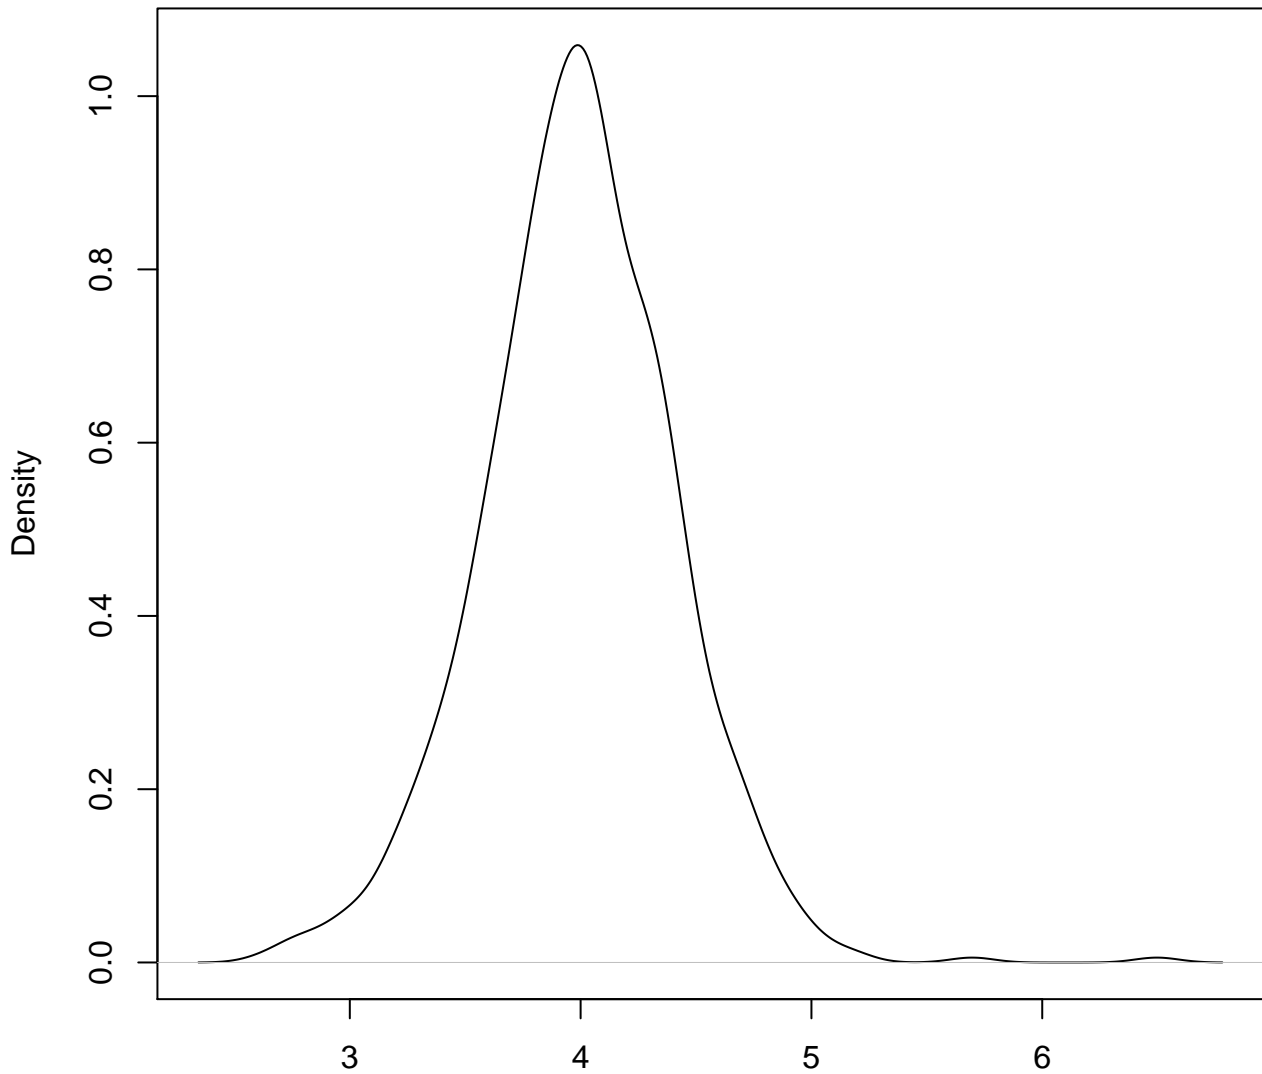

# Pre-adjusted CDH3 distribution

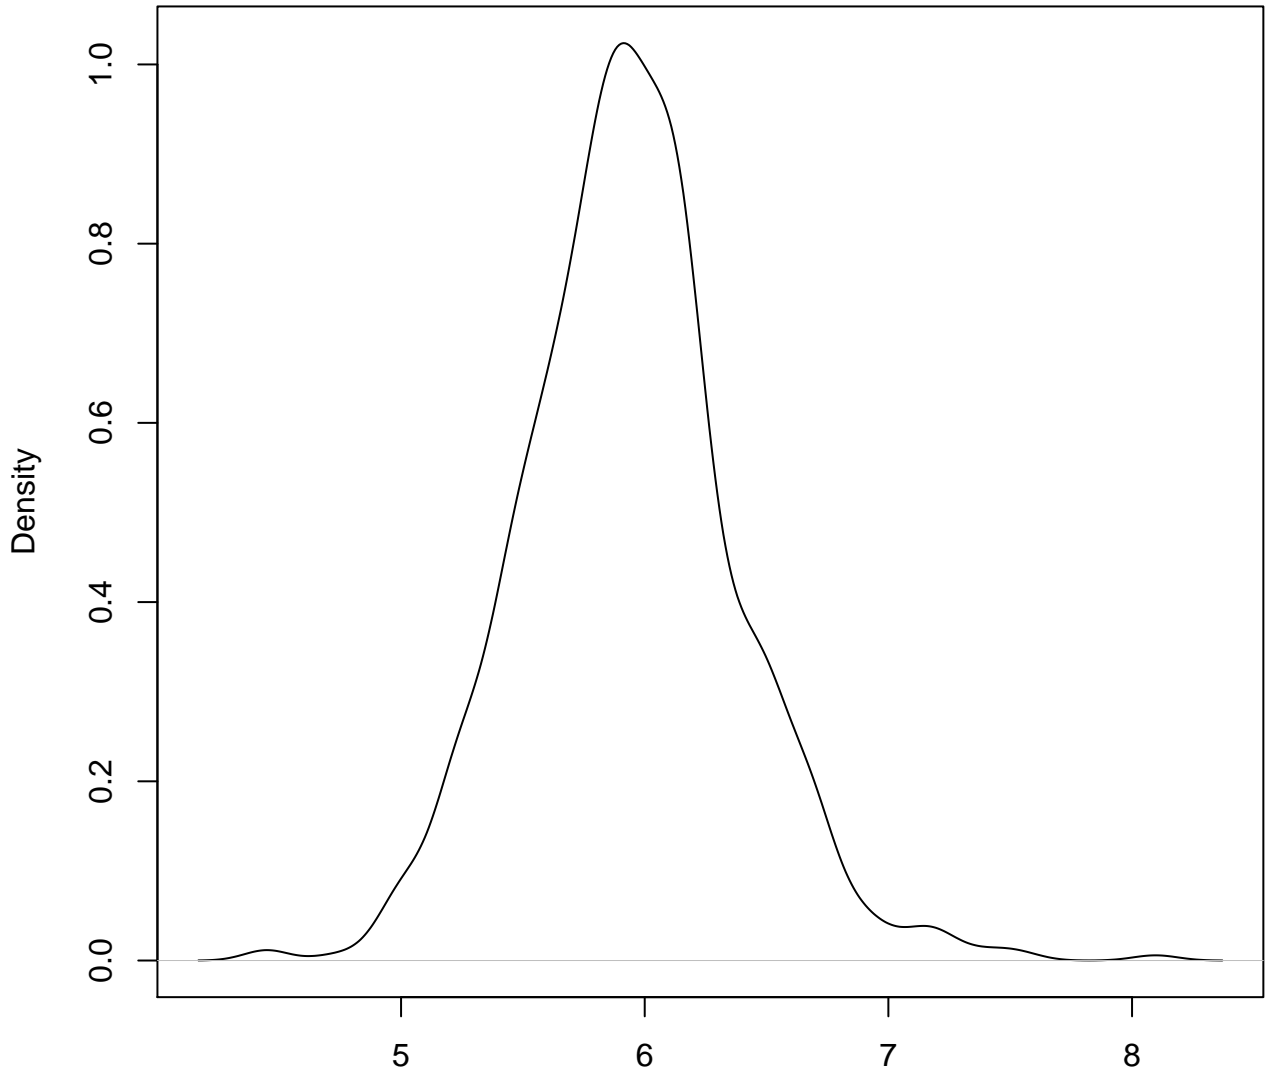

# Pre-adjusted GFR-alpha-1 distribution

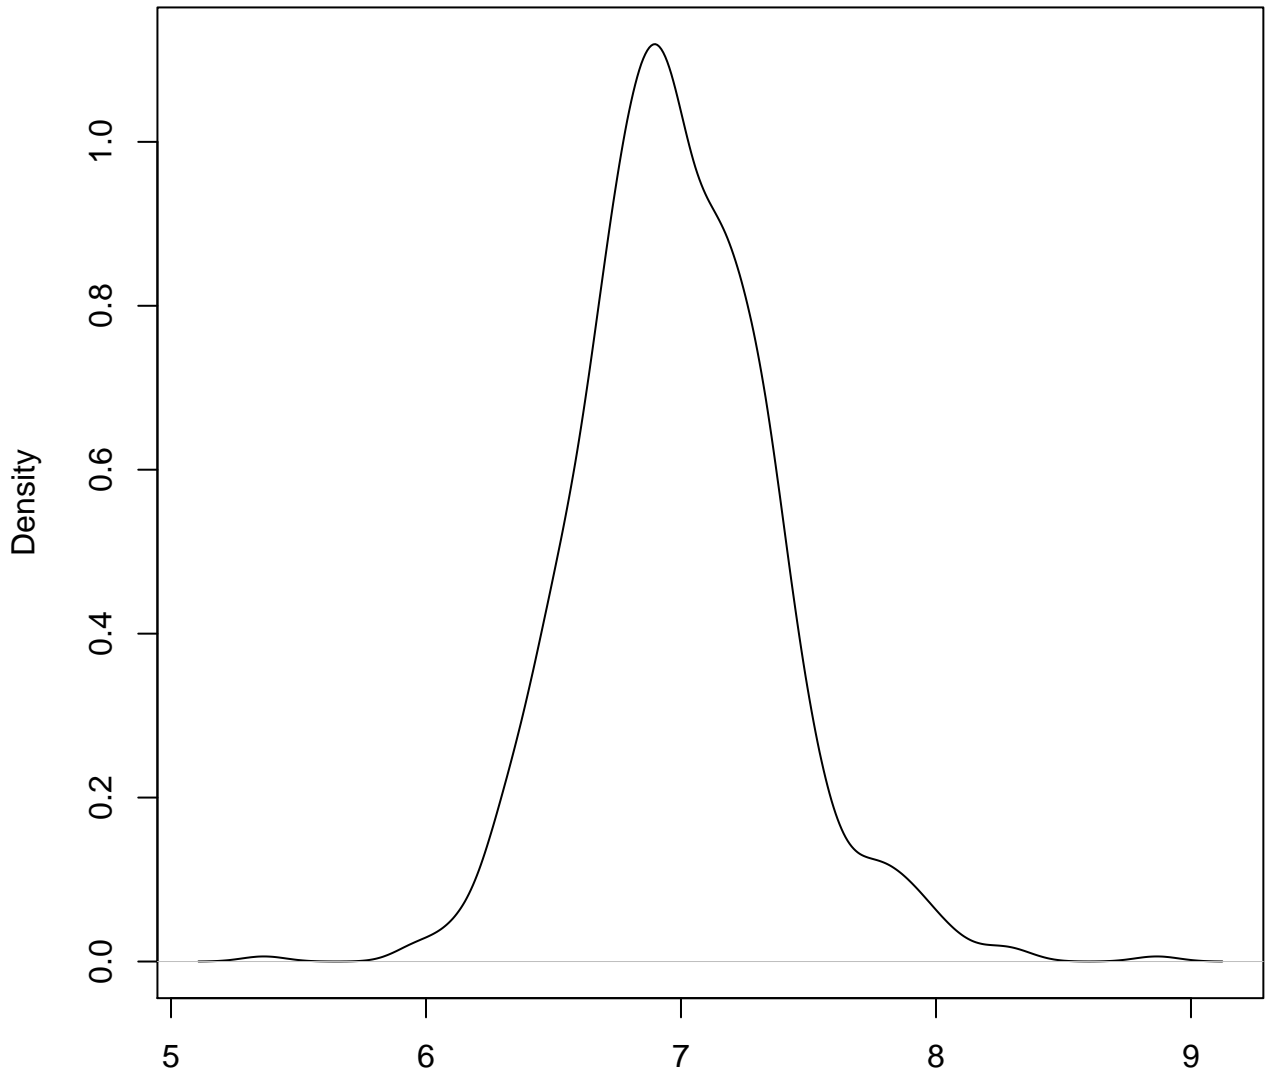

# Pre-adjusted GM-CSF-R-alpha distribution

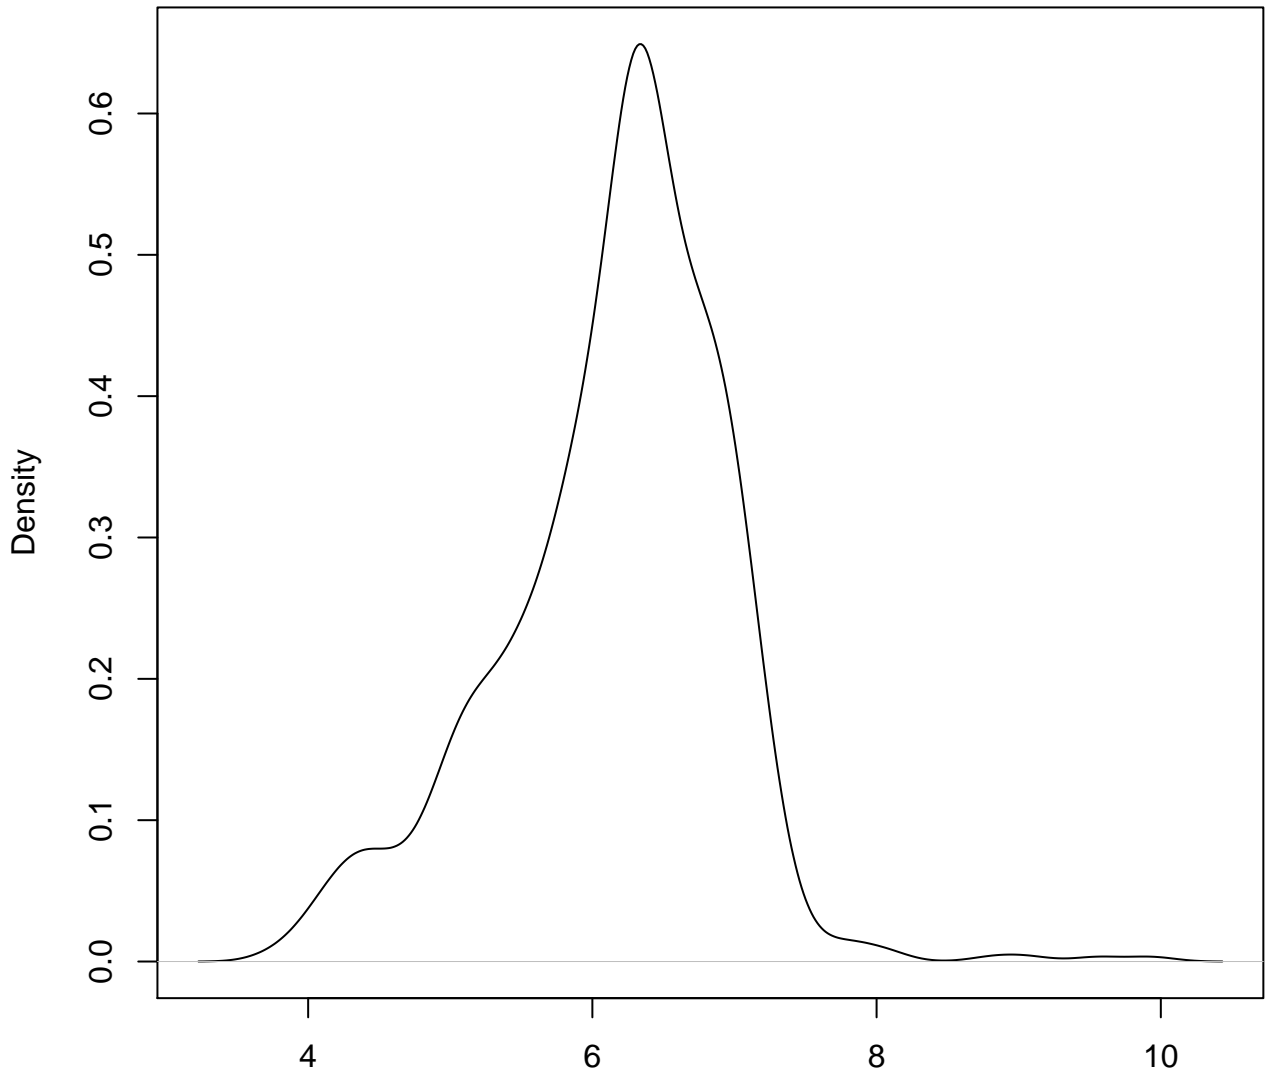



# Pre-adjusted Beta-NGF distribution

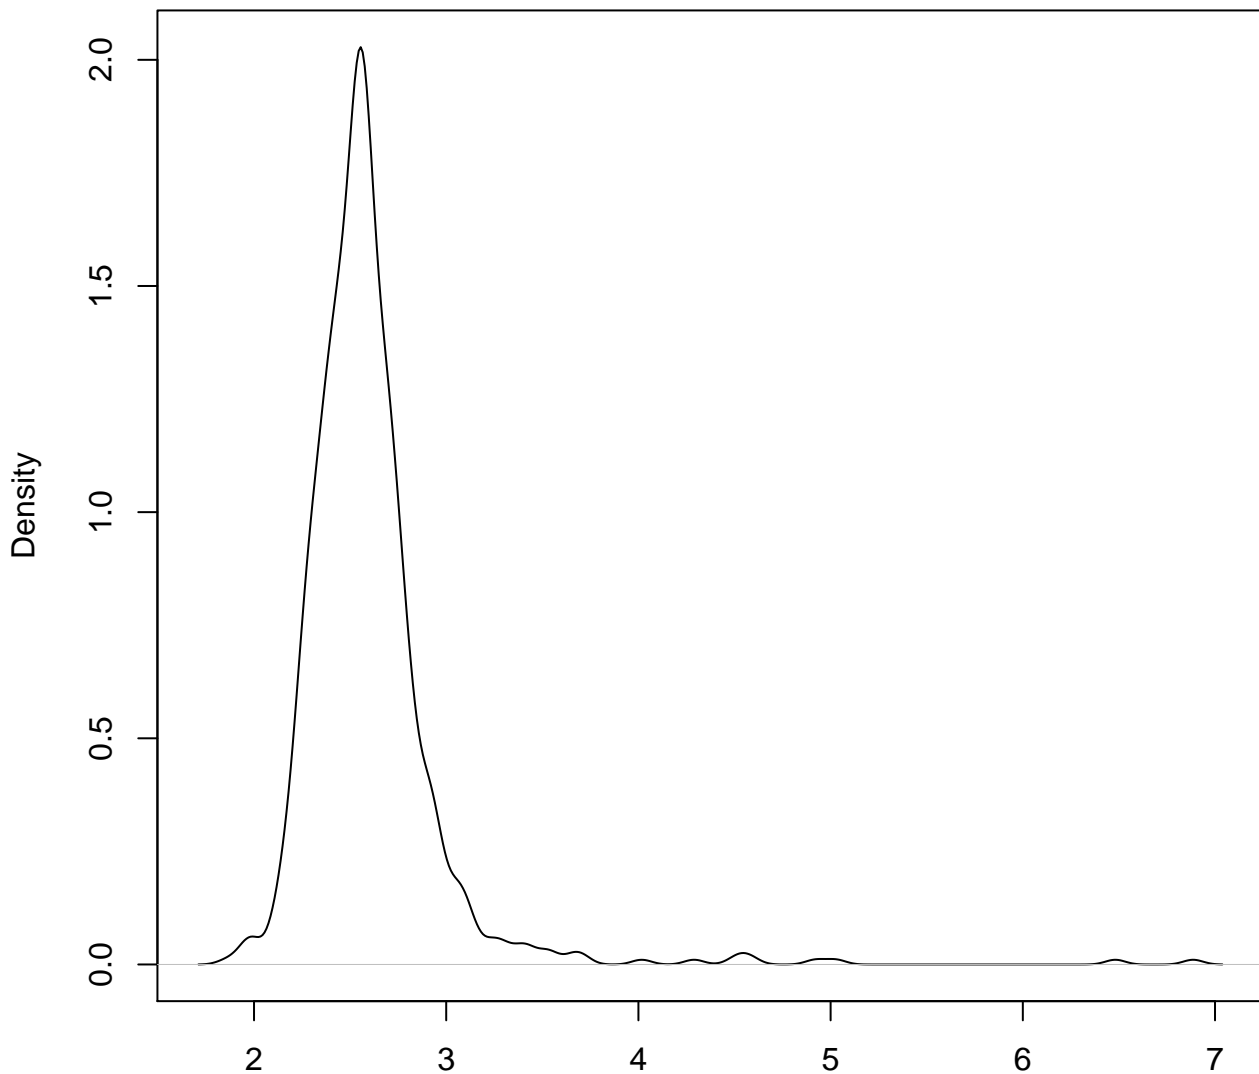

# Pre-adjusted SCARA5 distribution

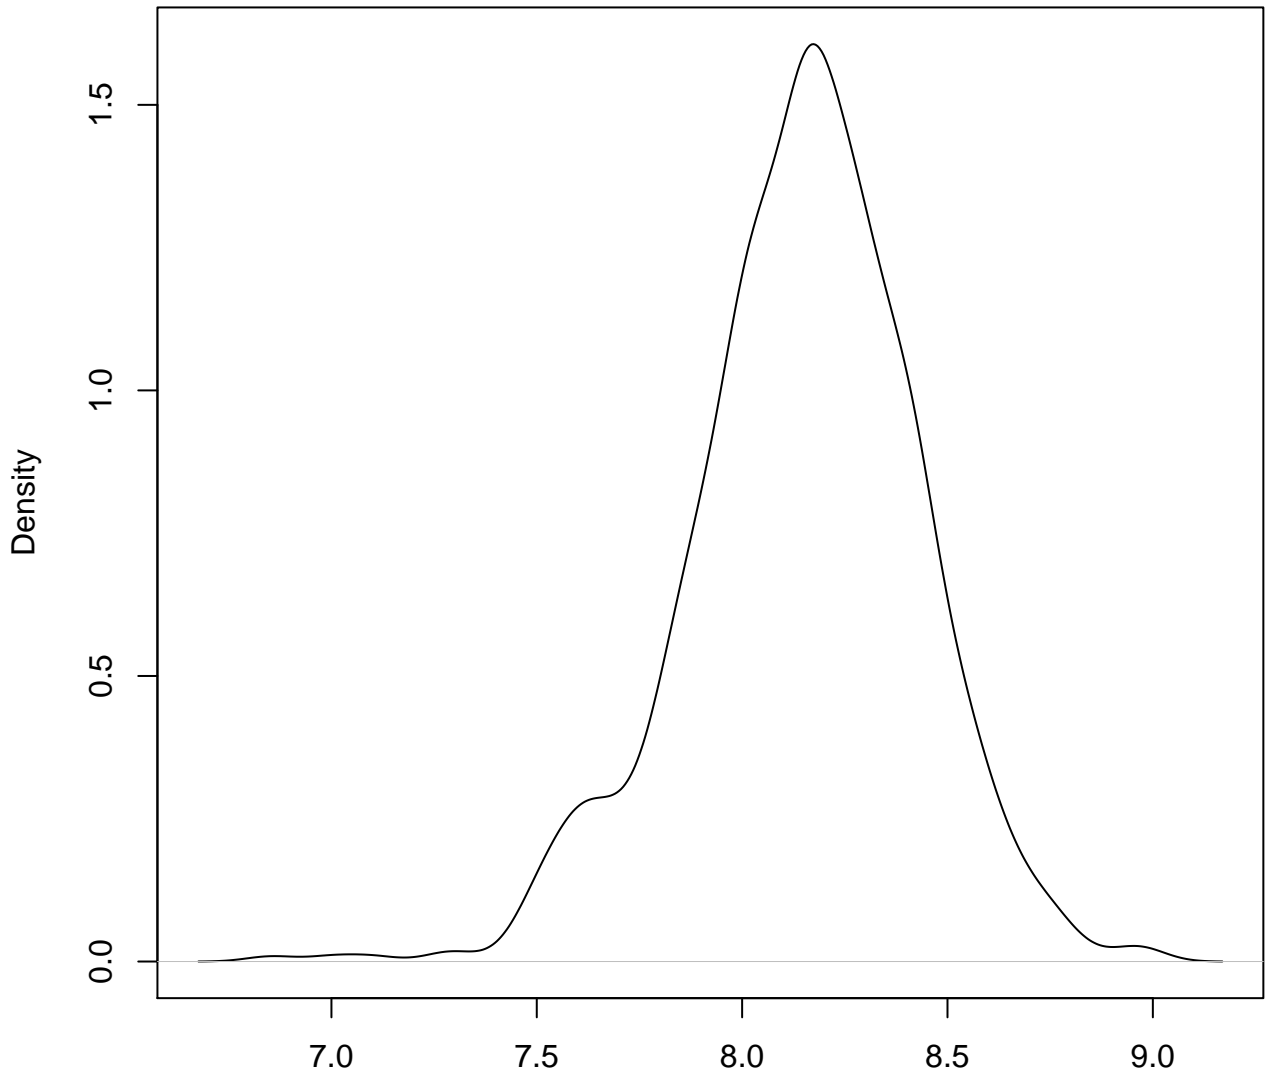

# Pre-adjusted CD200 distribution

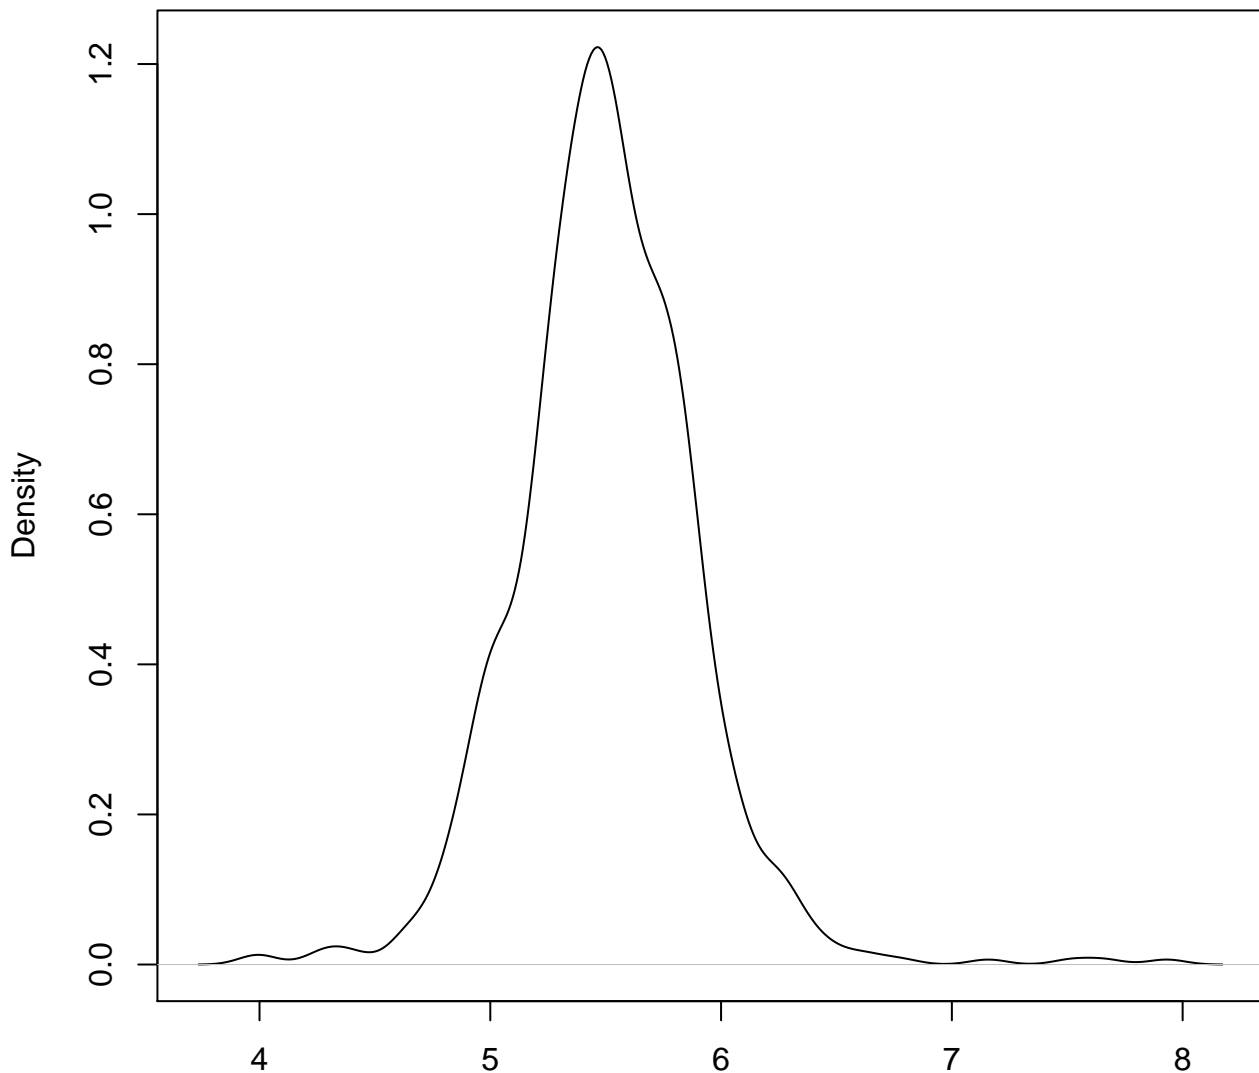

# Pre-adjusted NTRK2 distribution

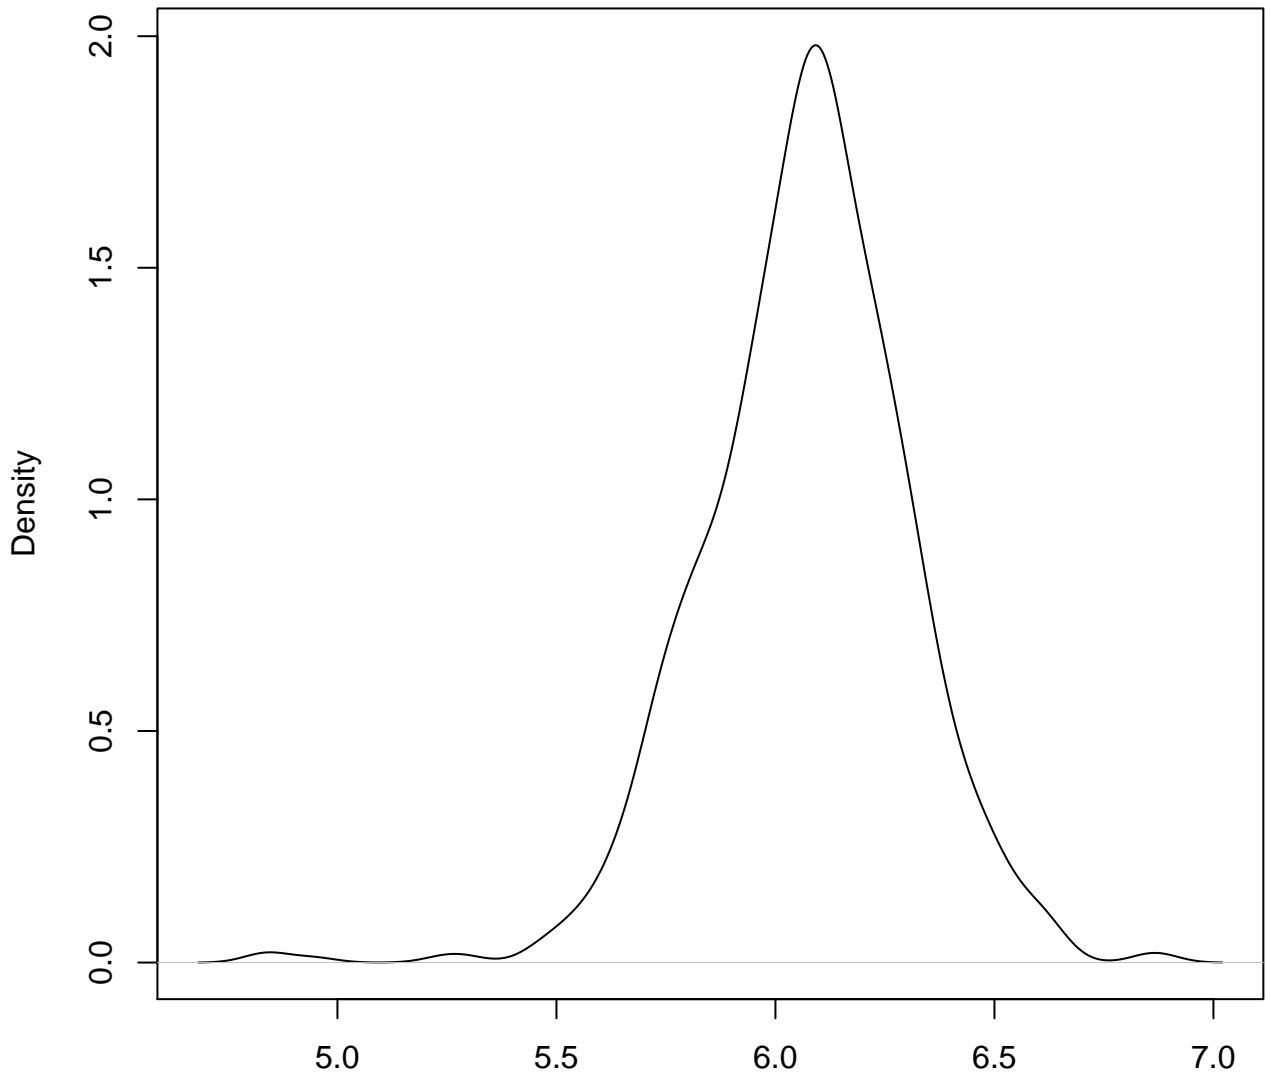

# Pre-adjusted GZMA distribution

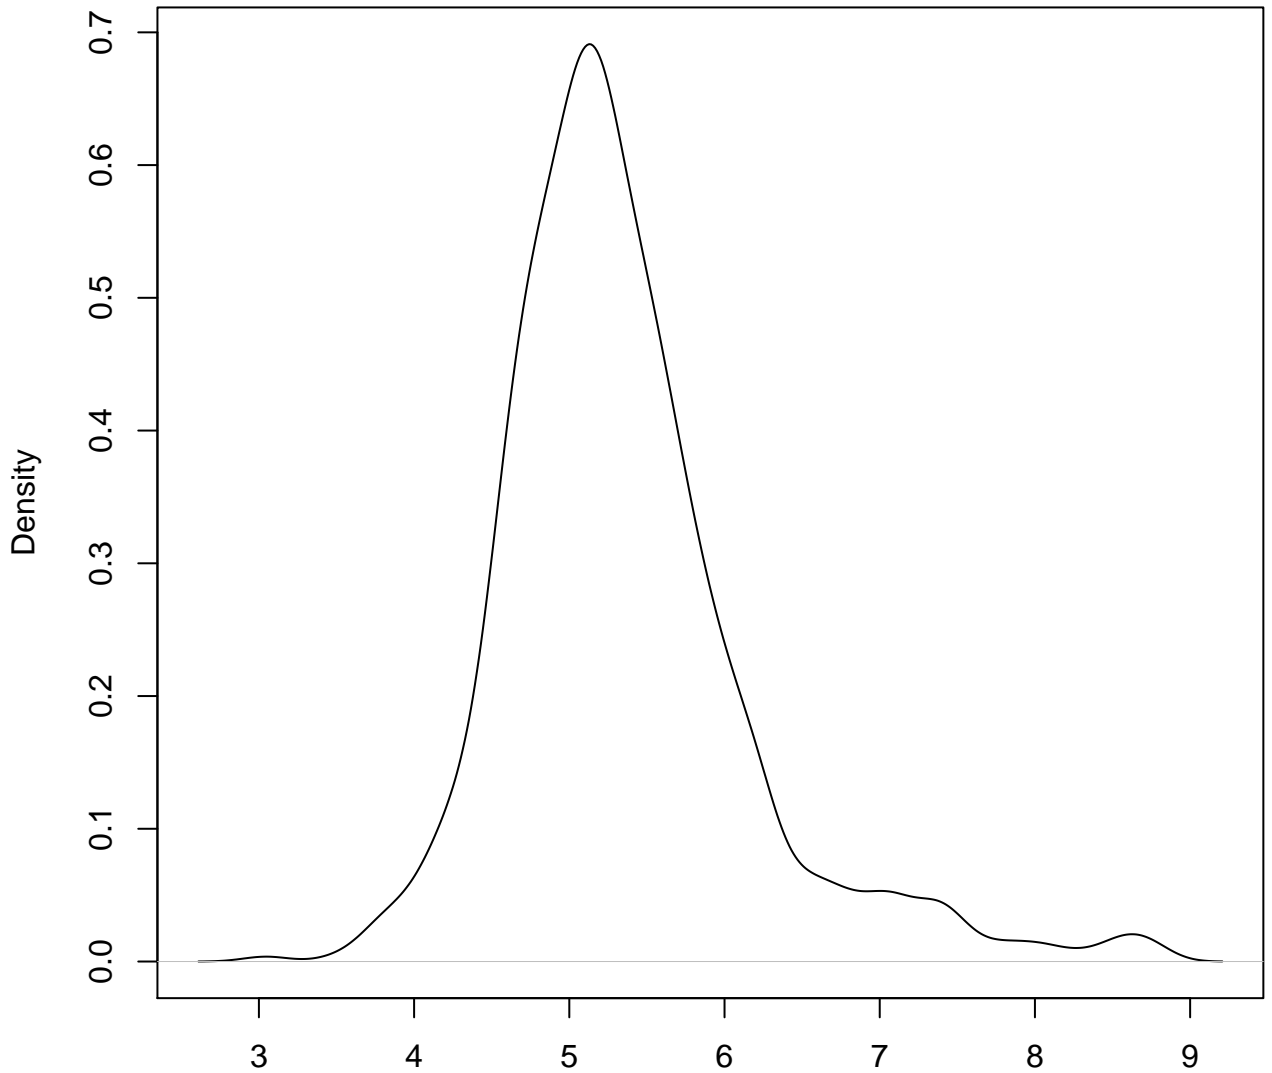

# Pre-adjusted G-CSF distribution

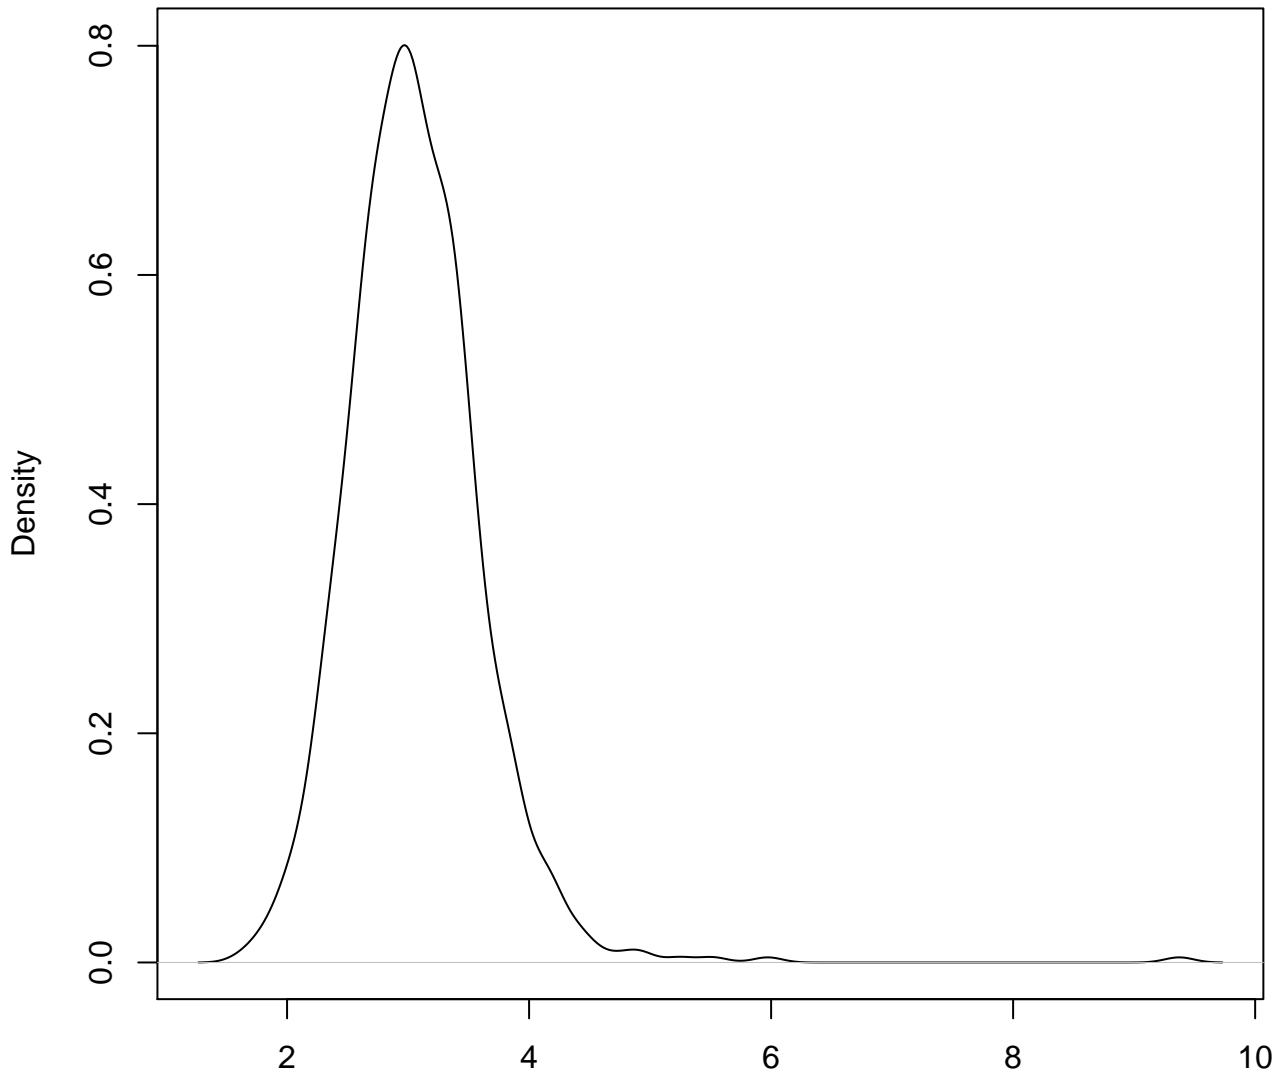

# Pre-adjusted DRAXIN distribution

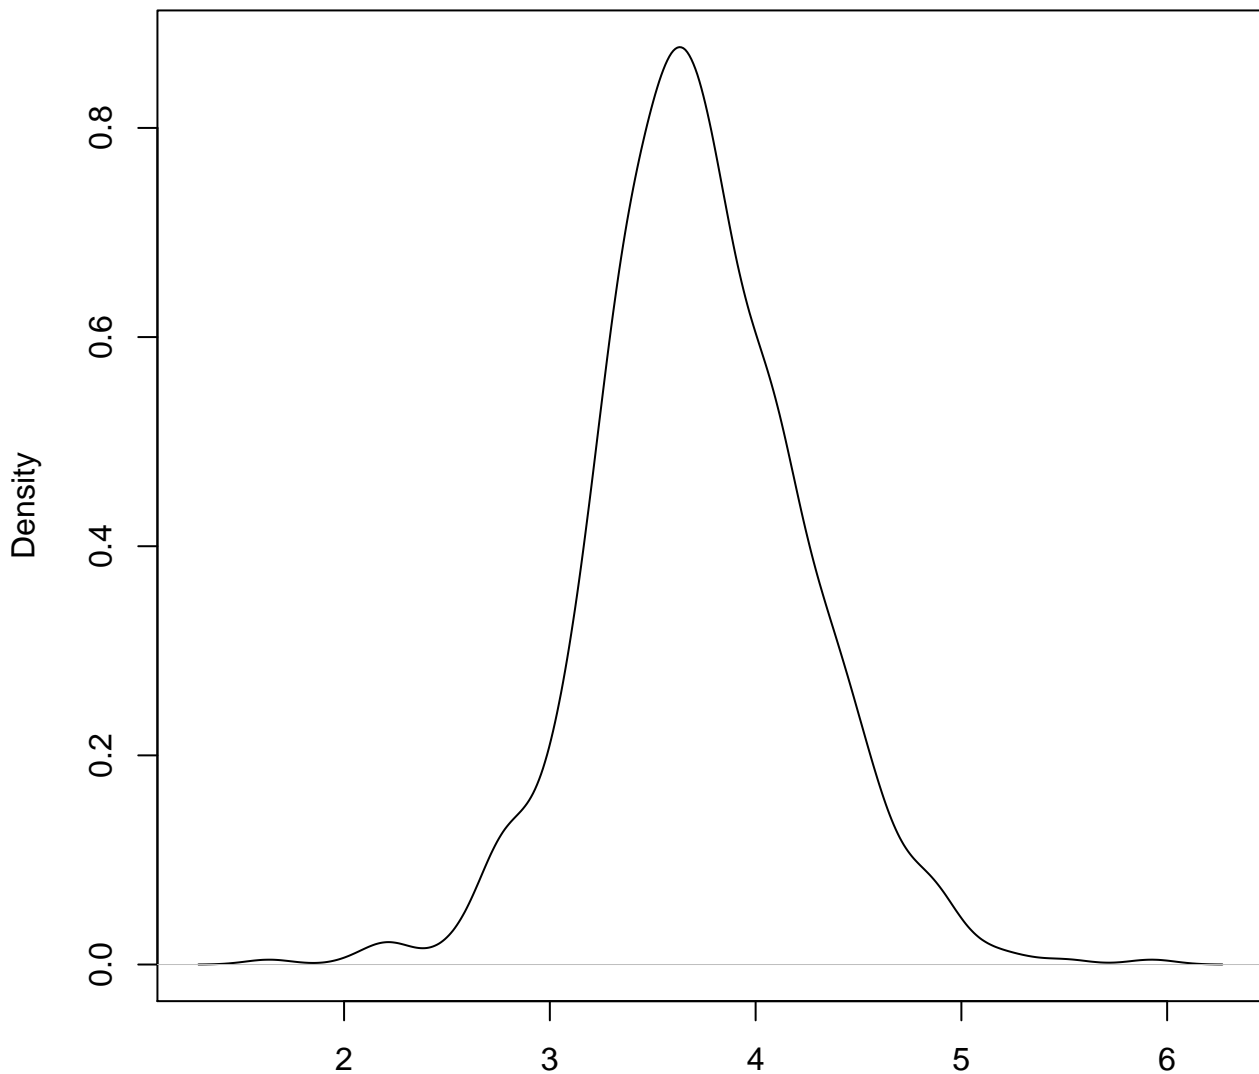

# Pre-adjusted SCARF2 distribution

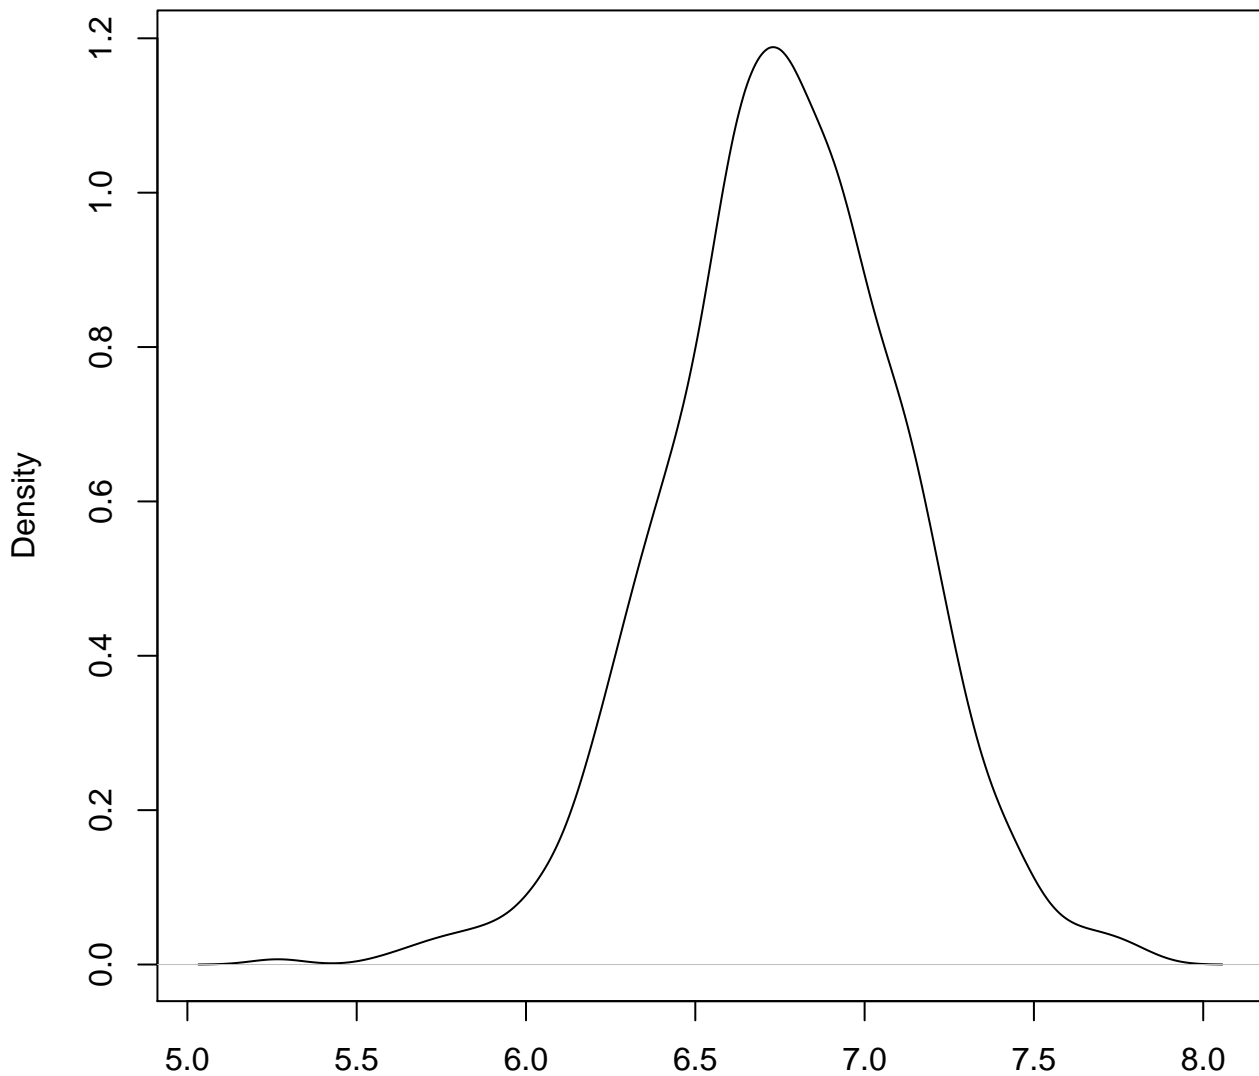



# Pre-adjusted GDNFR-alpha-3 distribution

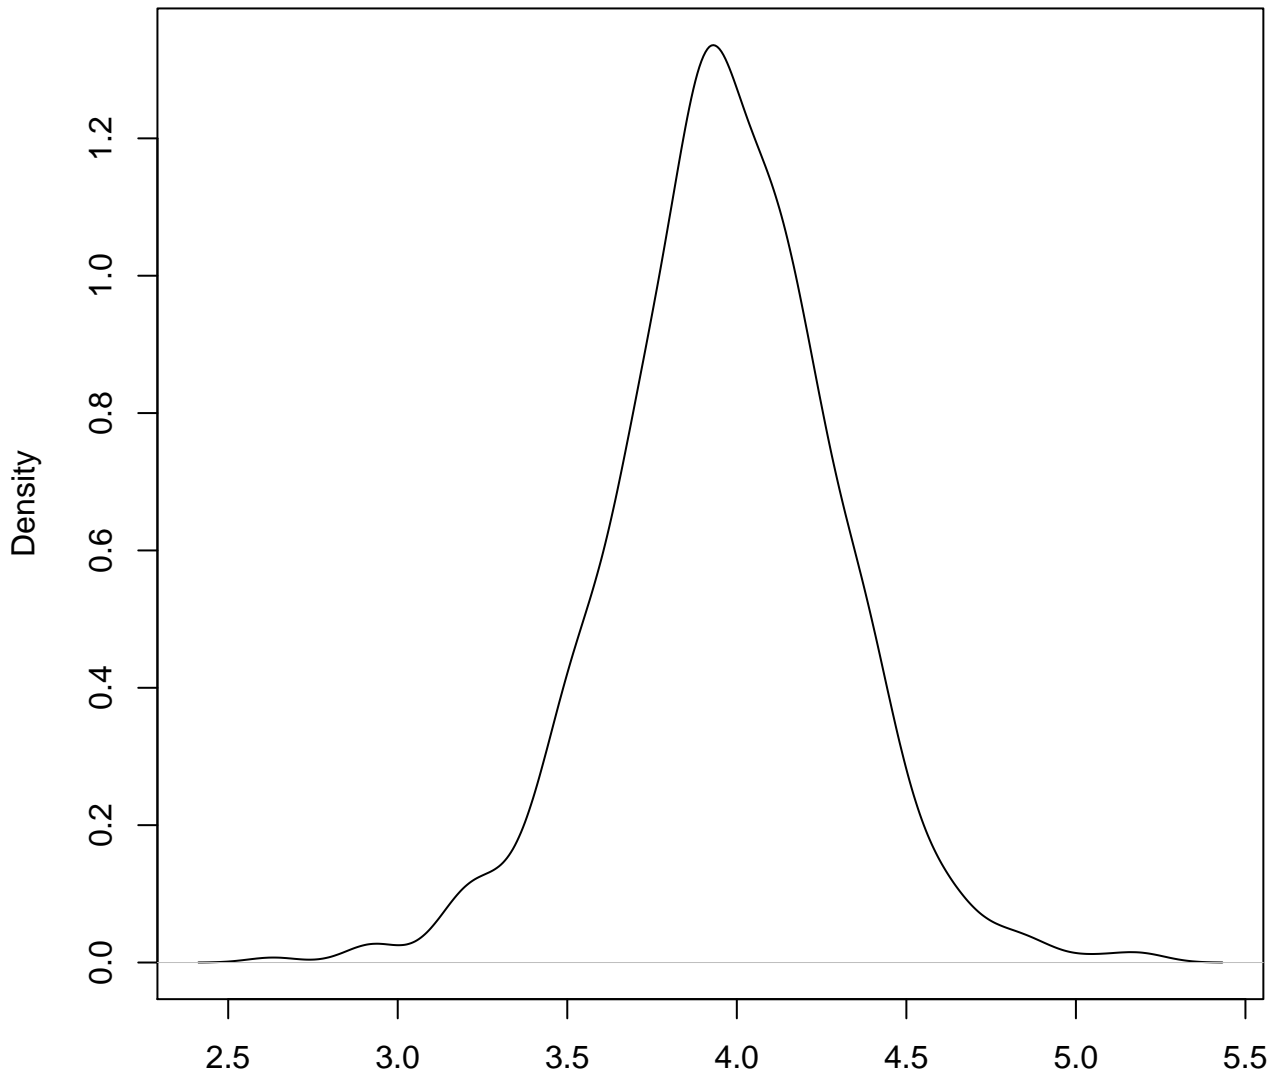

# Pre-adjusted PVR distribution

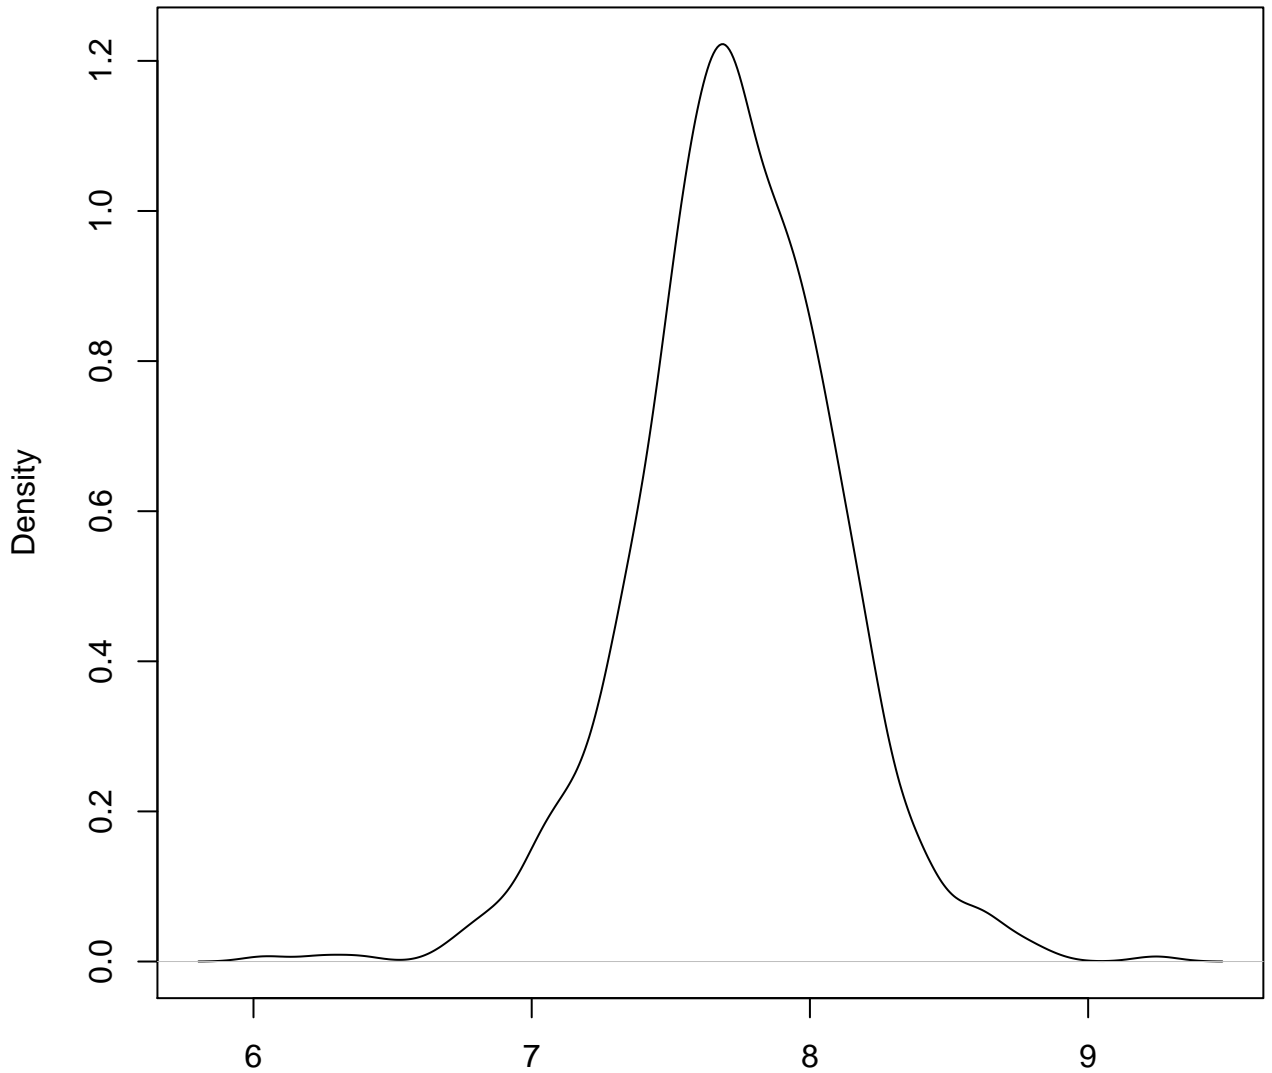

# Pre-adjusted TNFRSF12A distribution

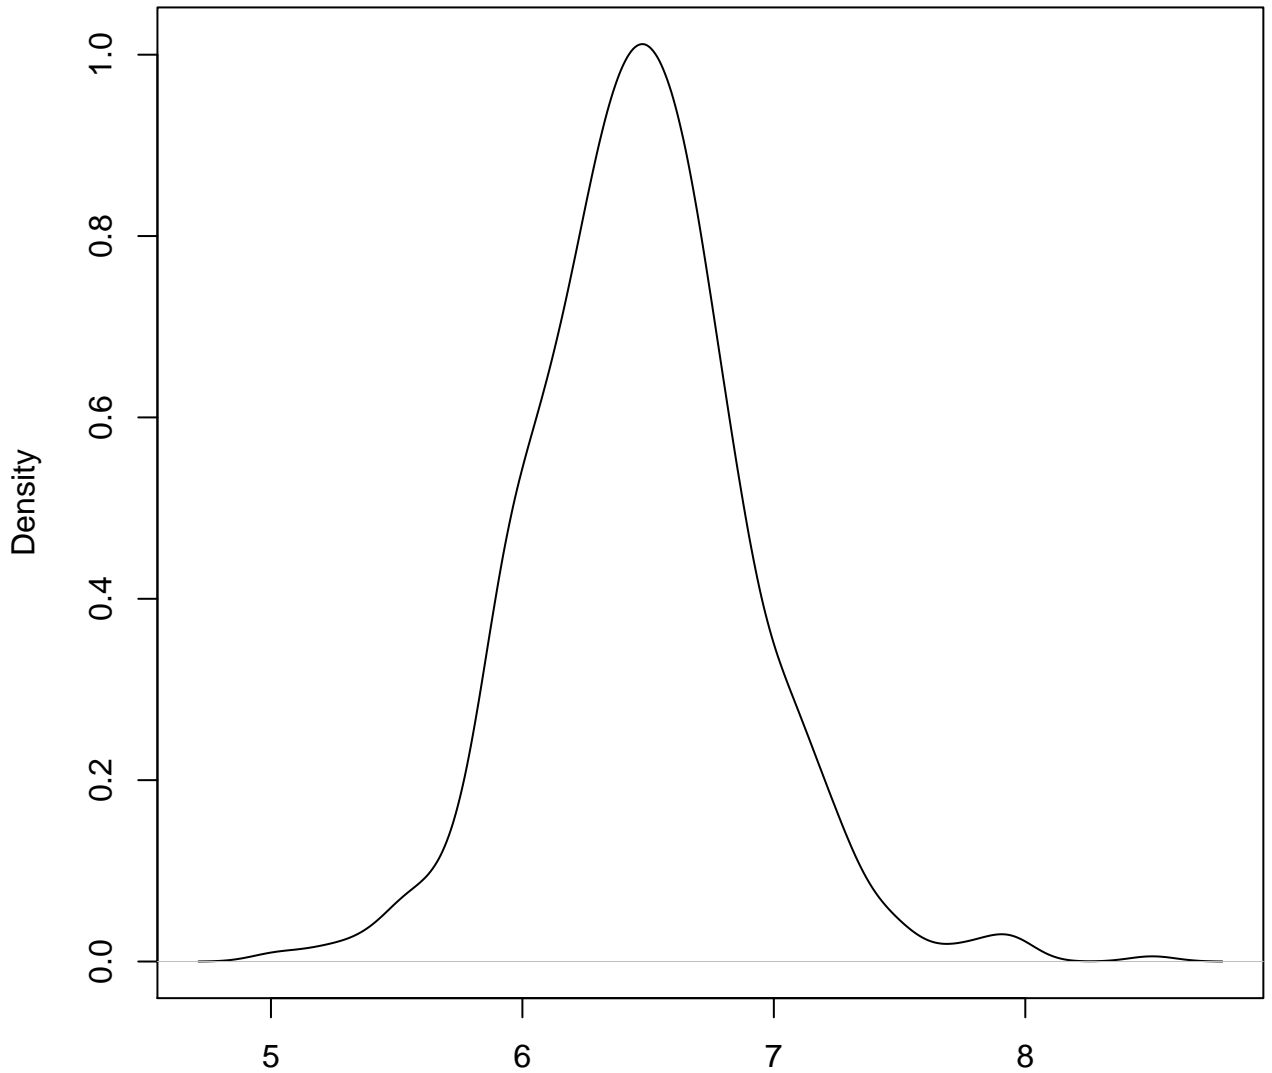

# Pre-adjusted SKR3 distribution

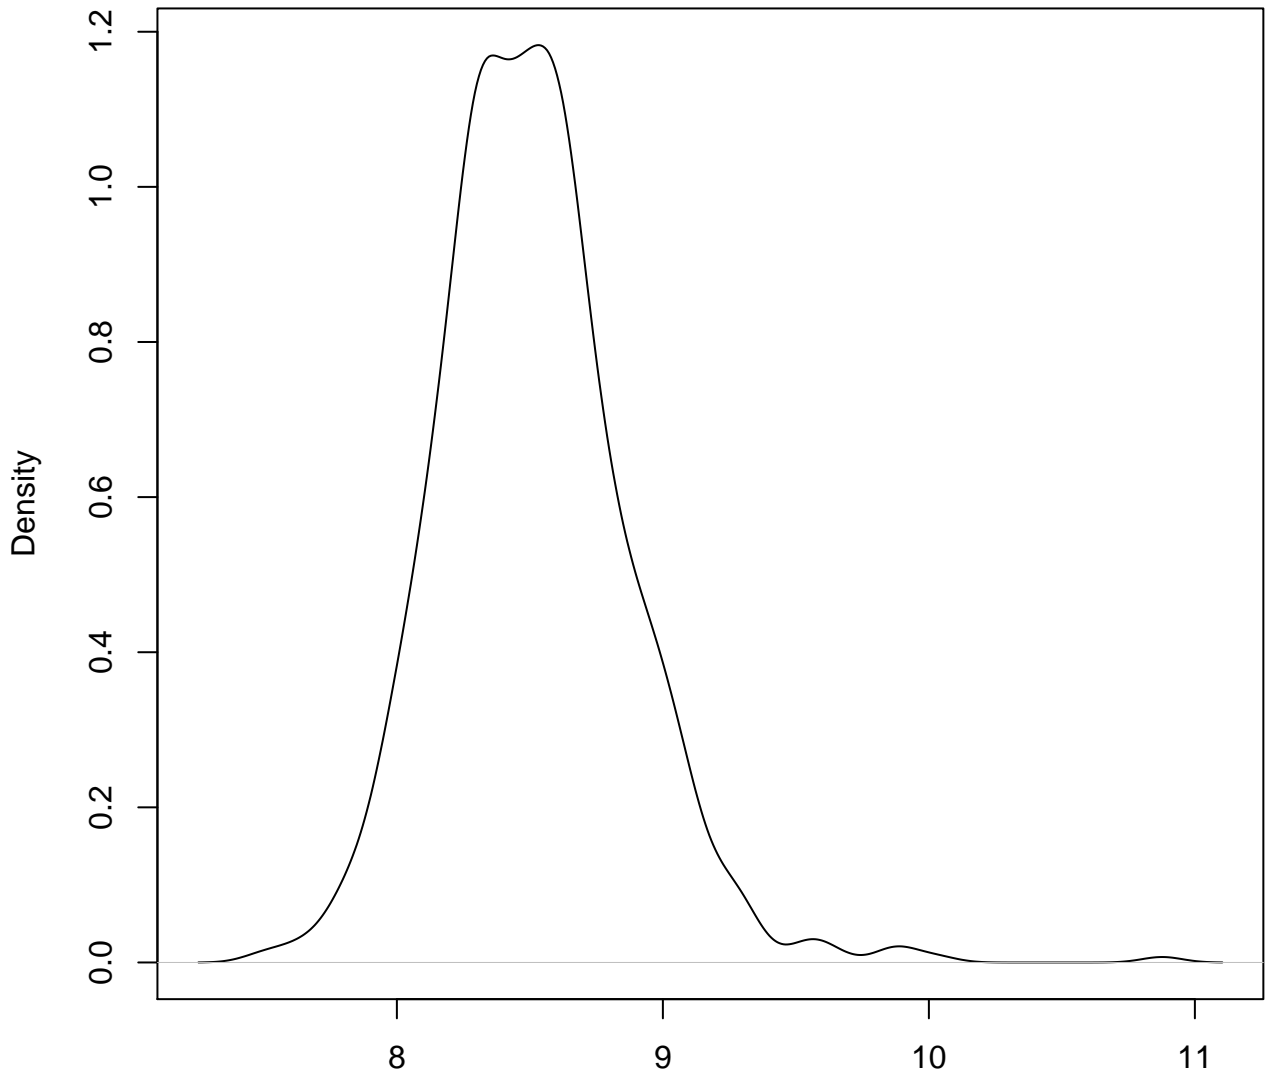

# Pre-adjusted FLRT2 distribution

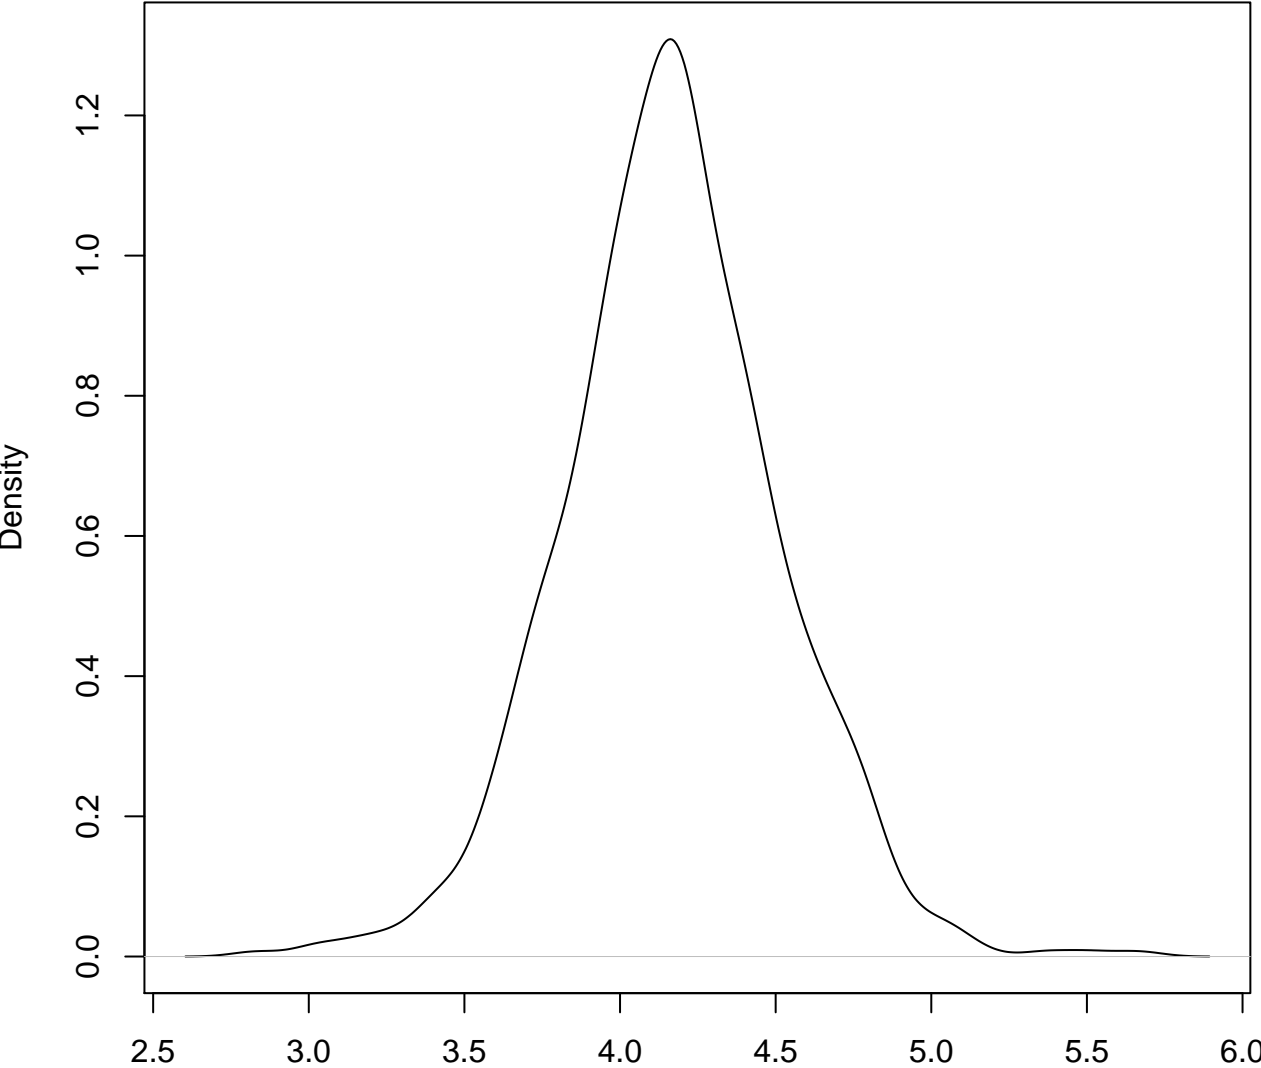

# Pre-adjusted CPM distribution

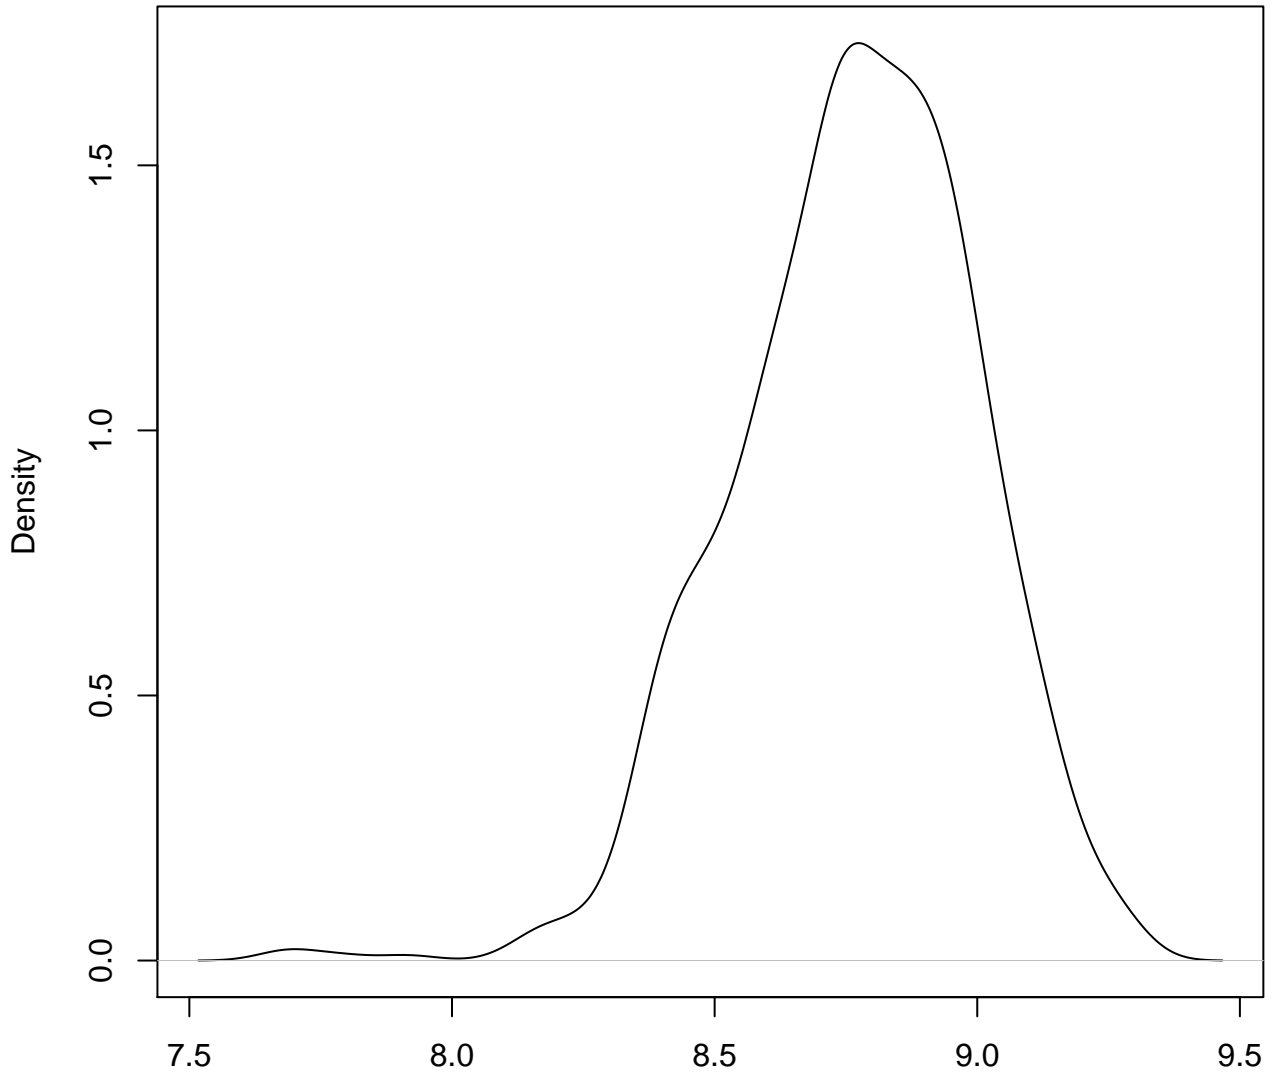

# Pre-adjusted CLEC10A distribution

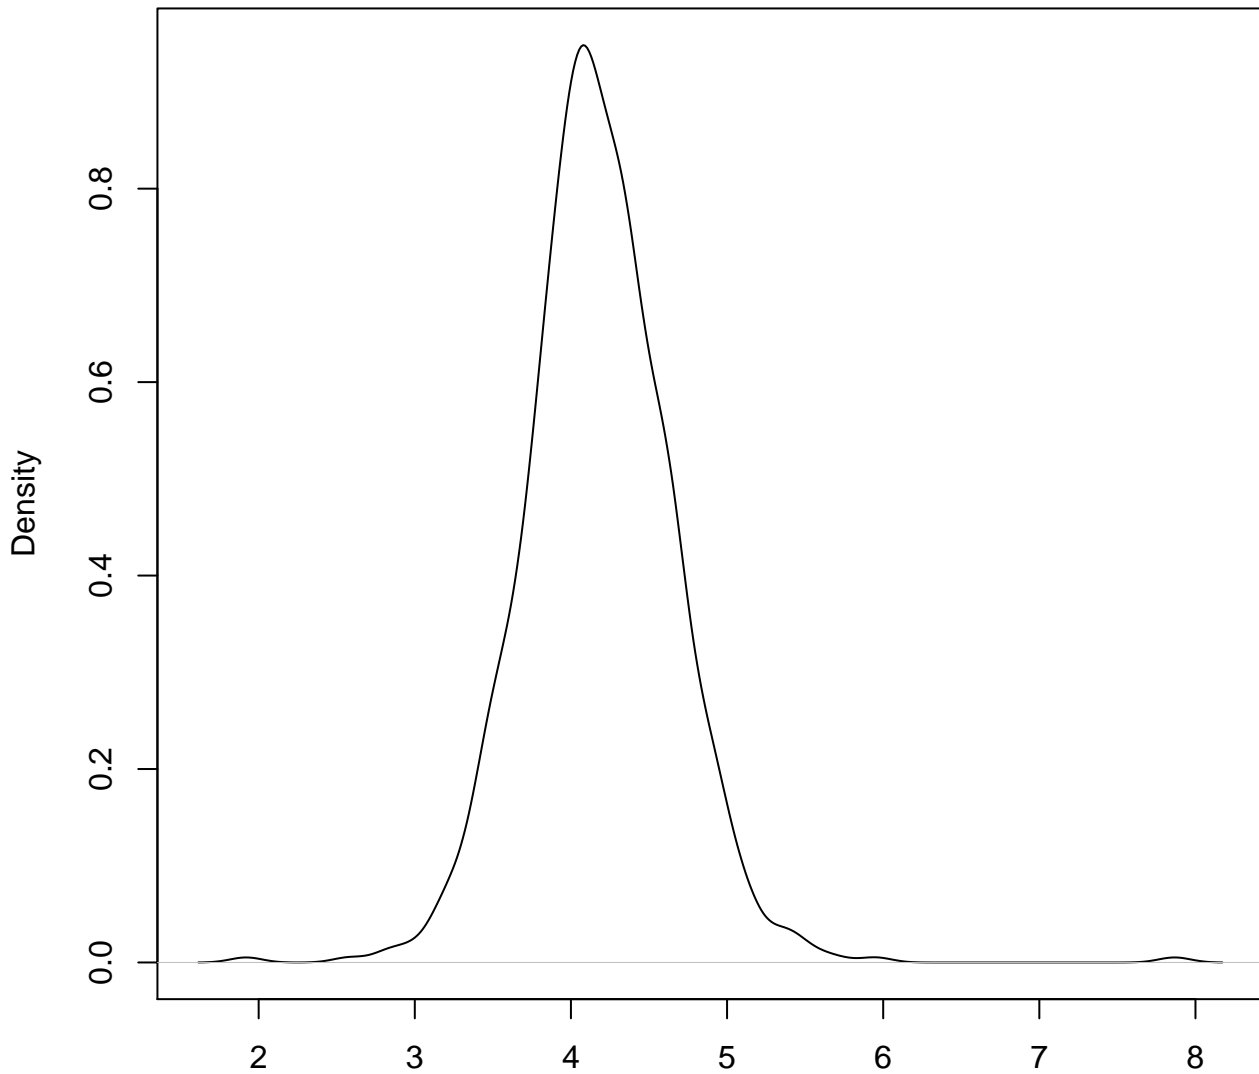

# Pre-adjusted GCP5 distribution

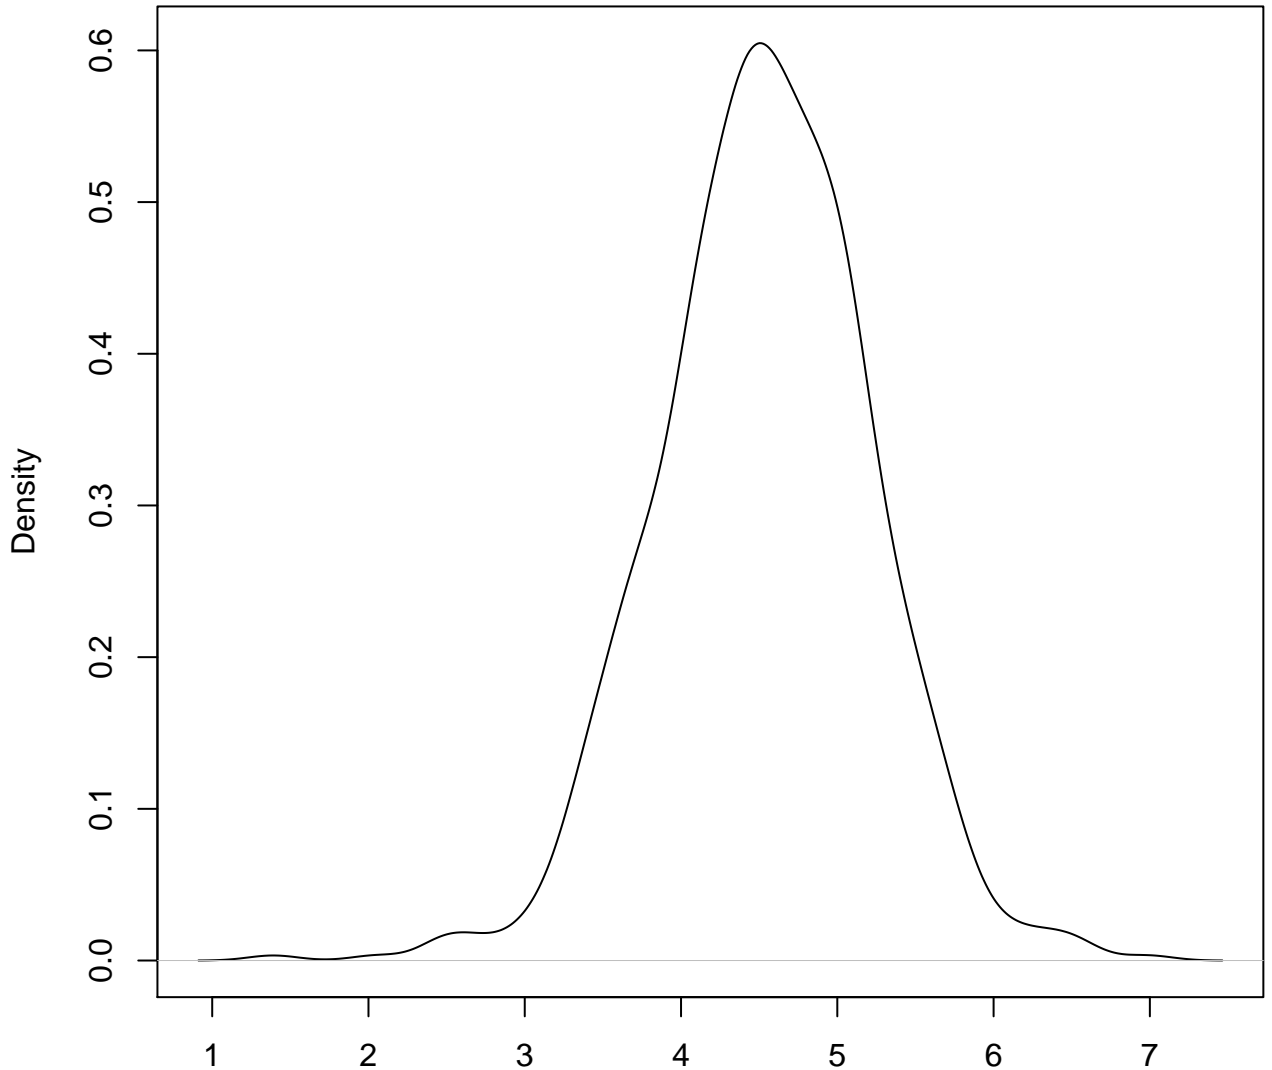



# Pre-adjusted BMP-4 distribution

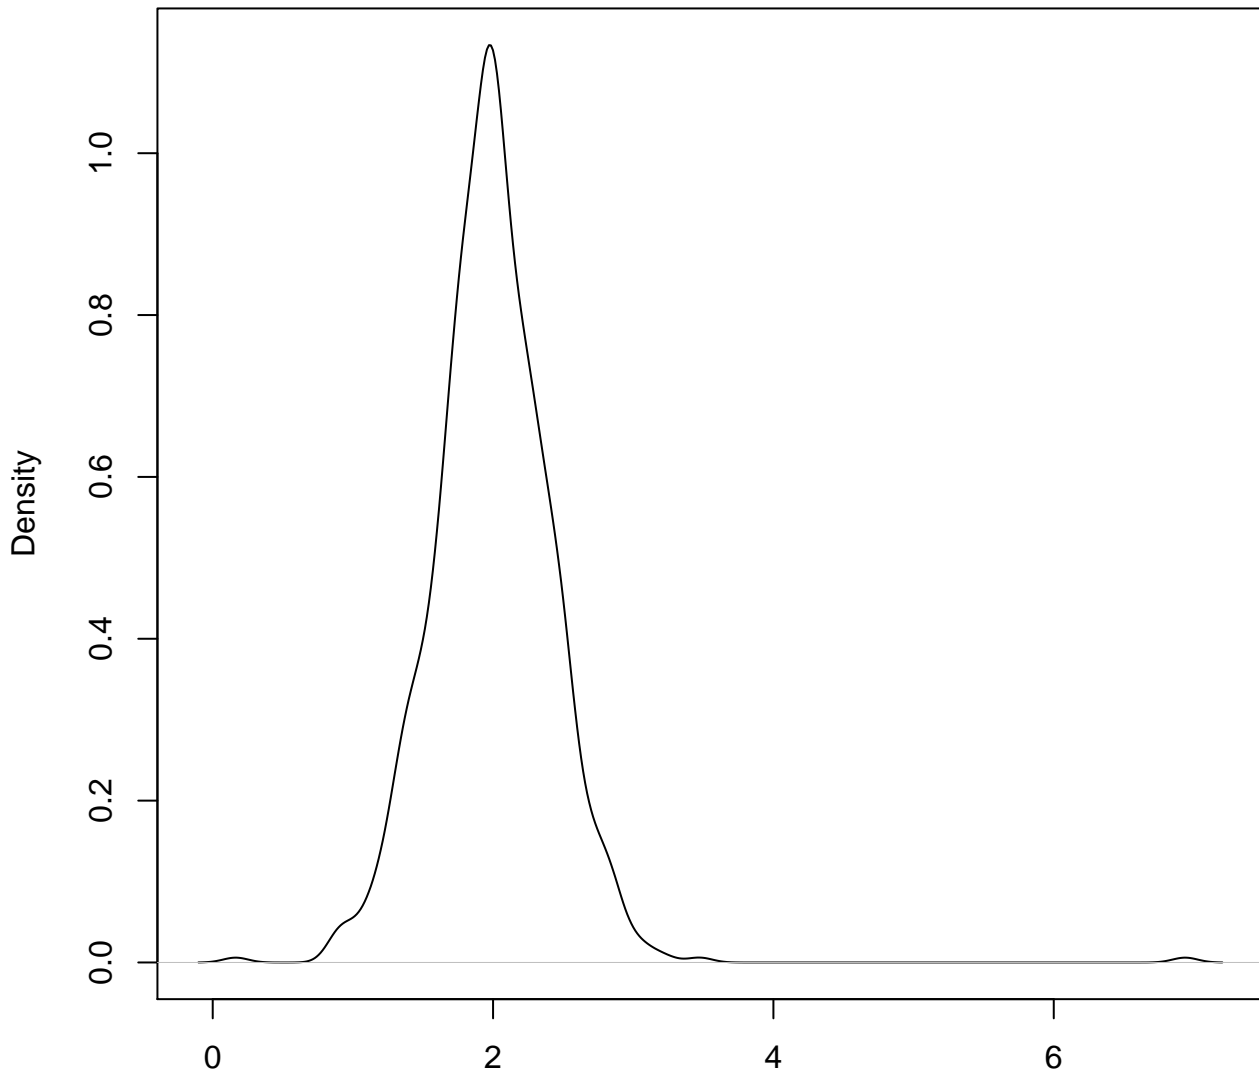

# Pre-adjusted FcRL2 distribution

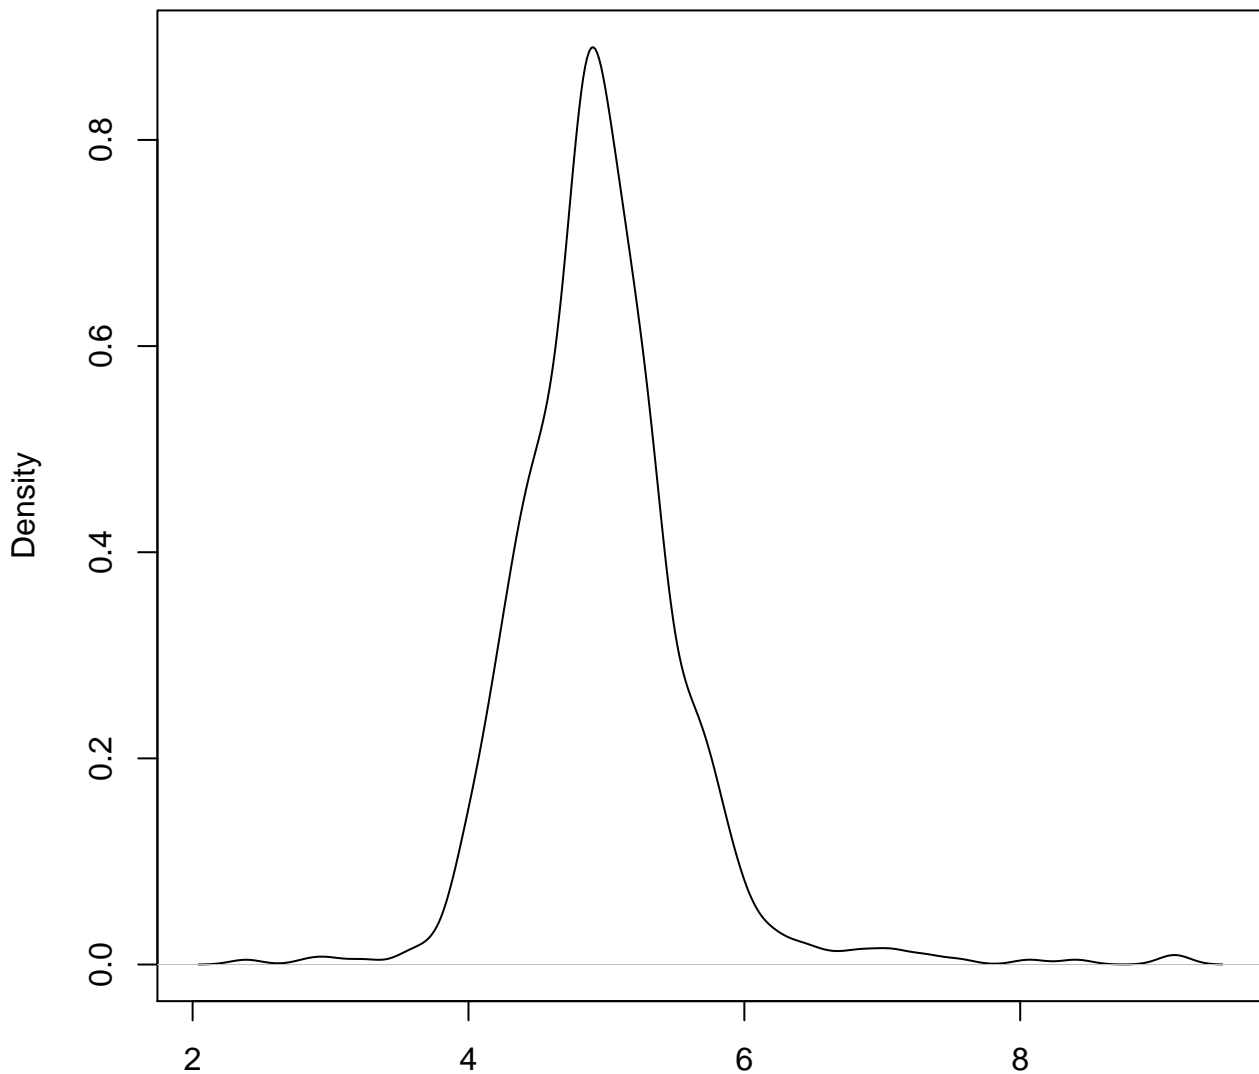

# Pre-adjusted MDGA1 distribution

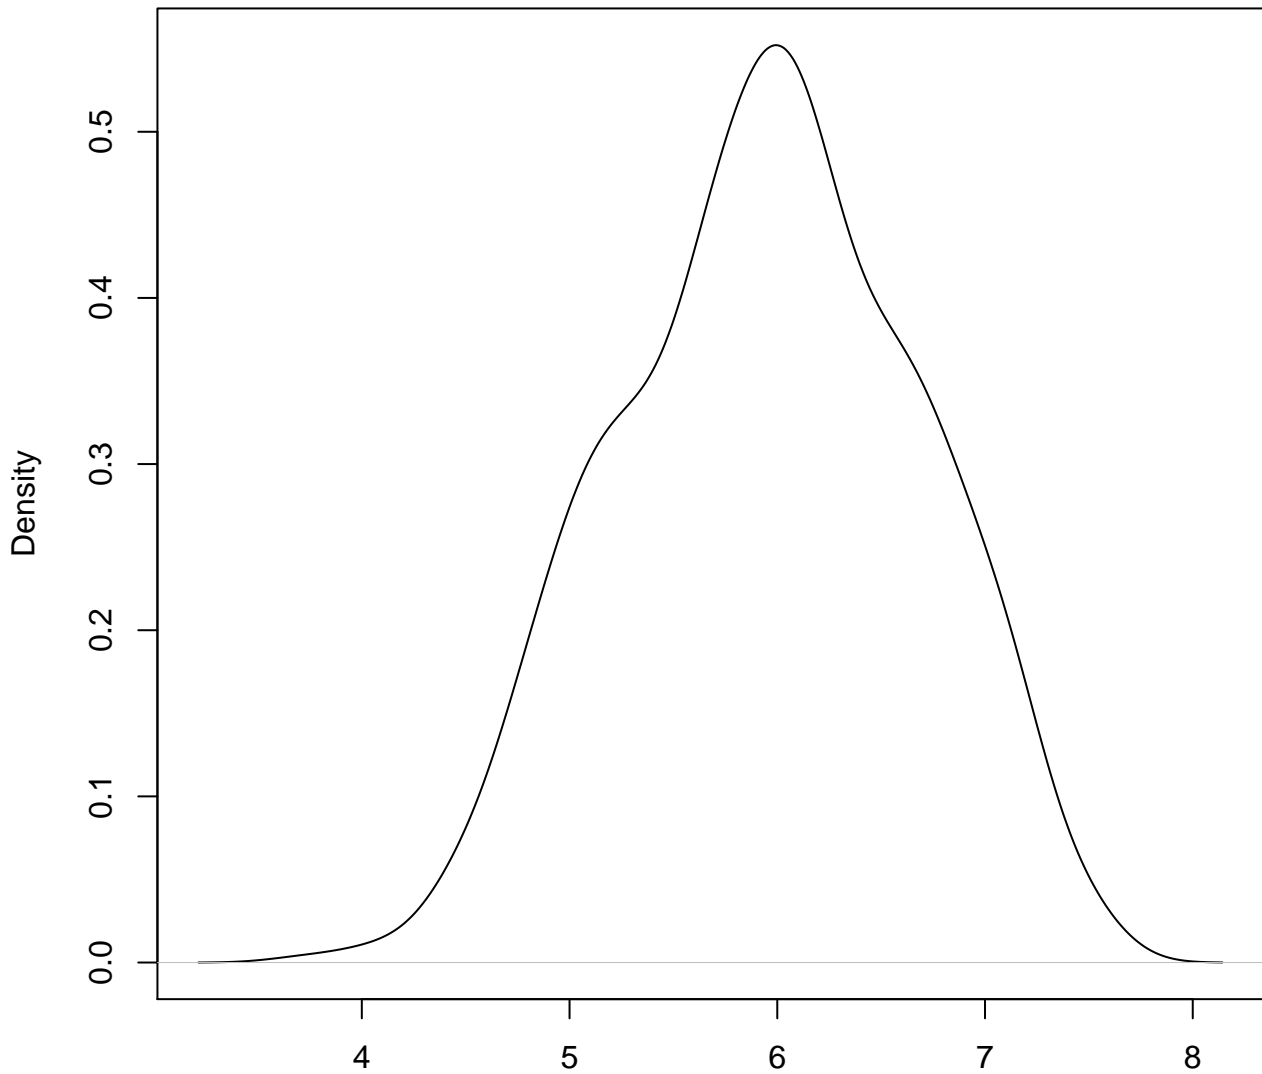

# Pre-adjusted IL-5R-alpha distribution

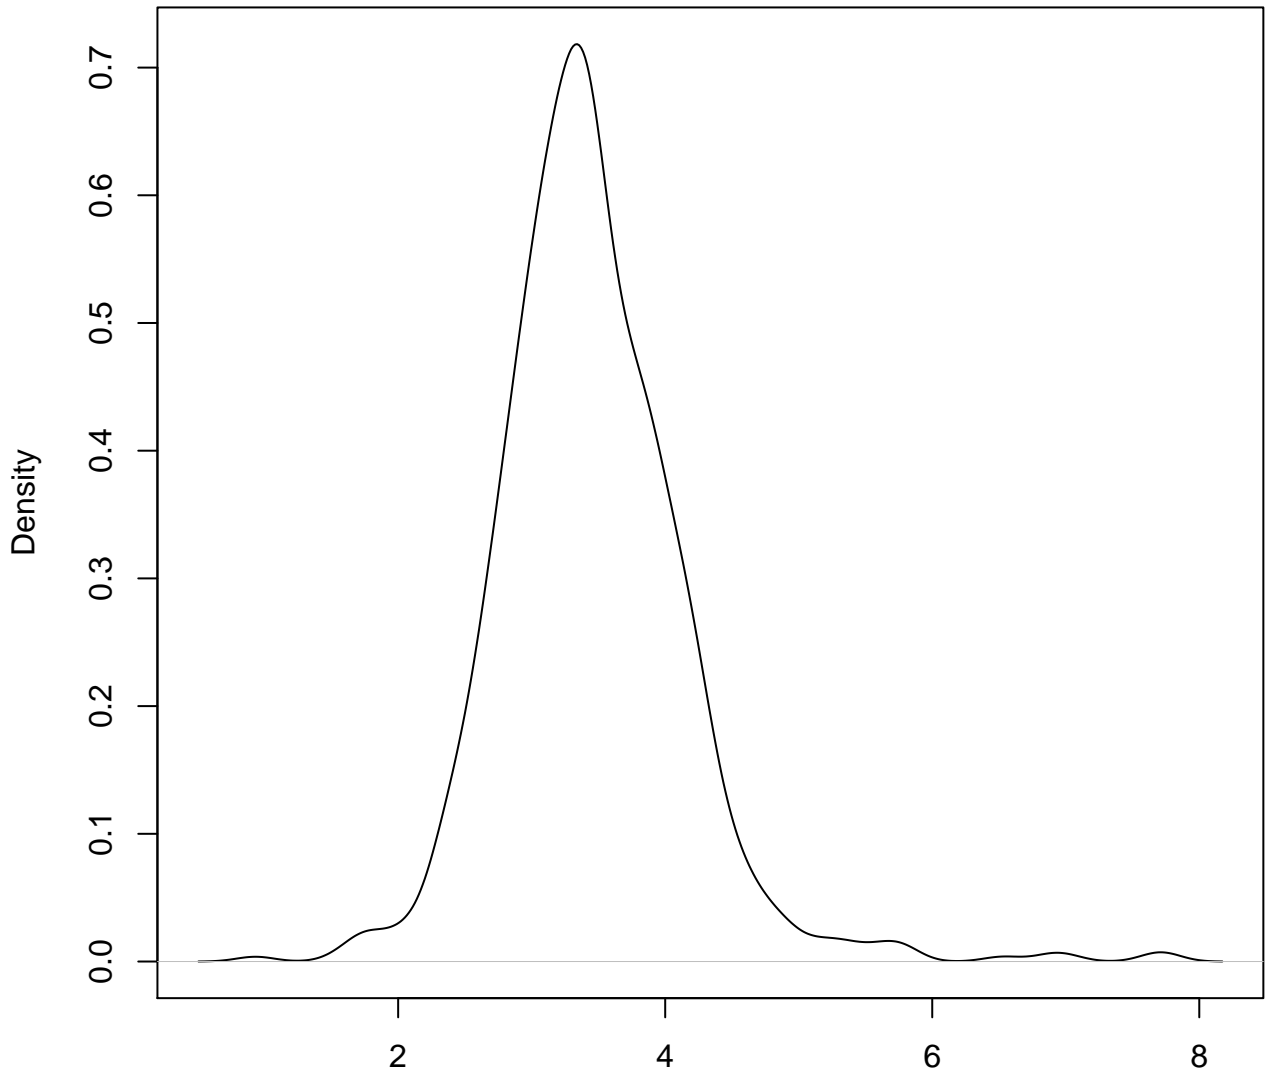

# Pre-adjusted PDGF-R-alpha distribution

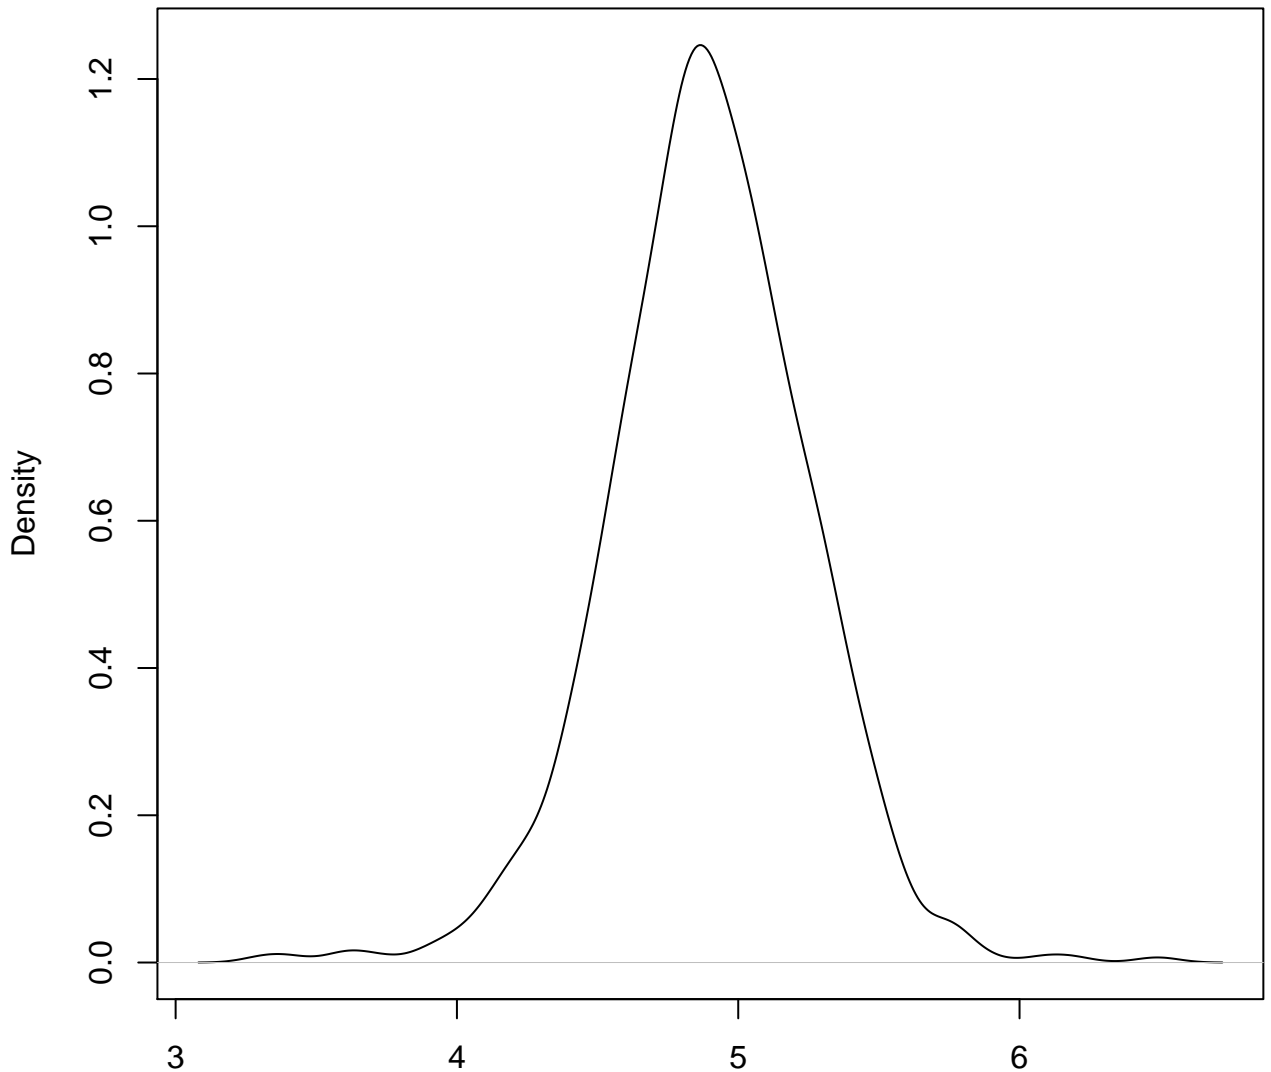

# Pre-adjusted CTSC distribution

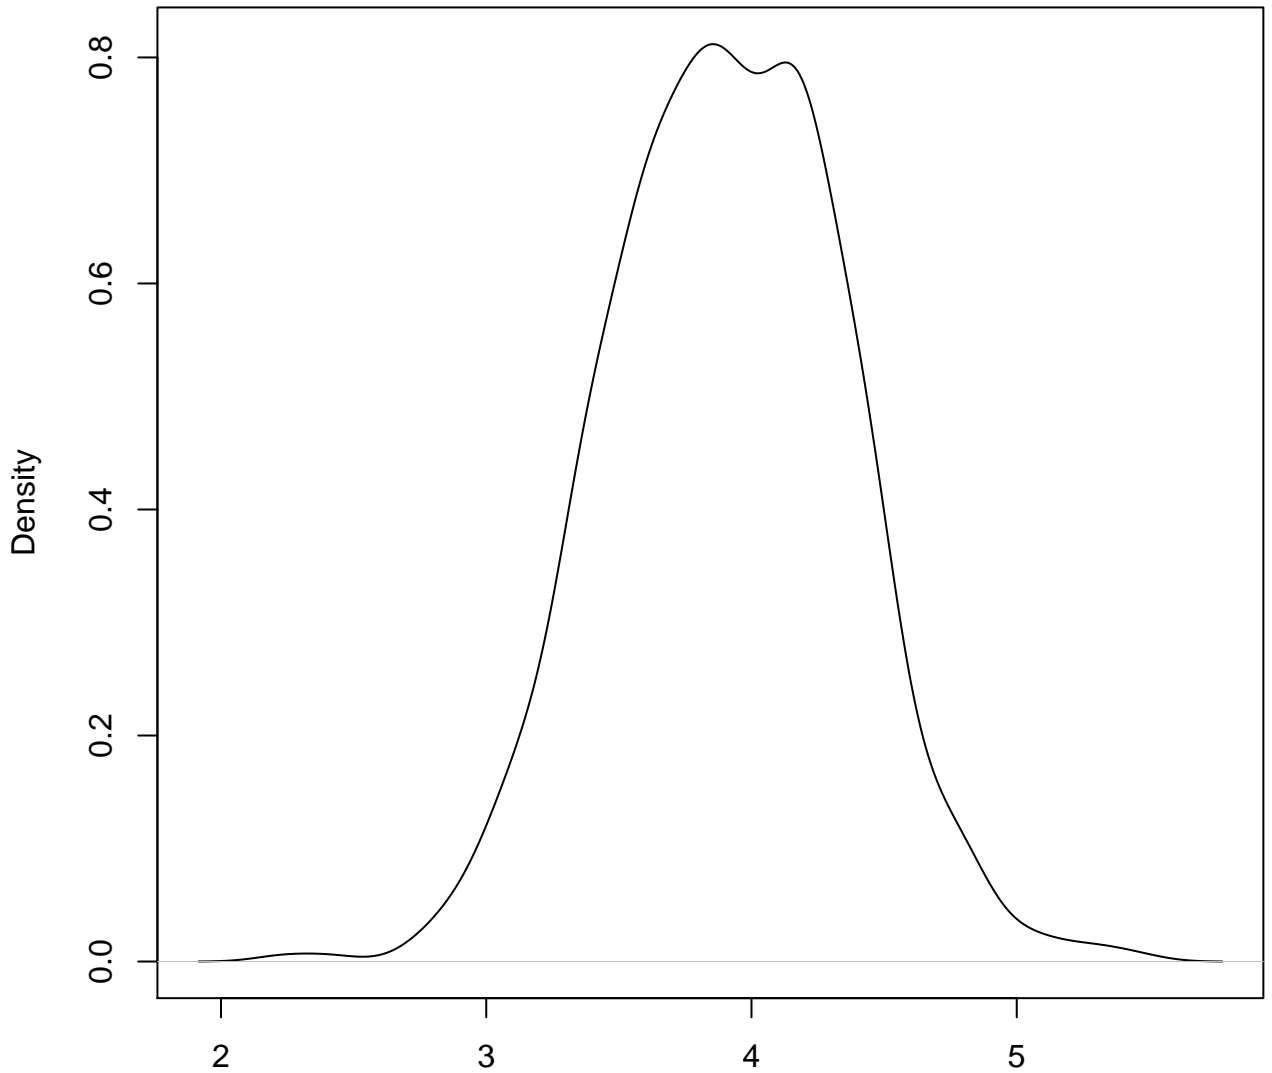

# Pre-adjusted CDH6 distribution

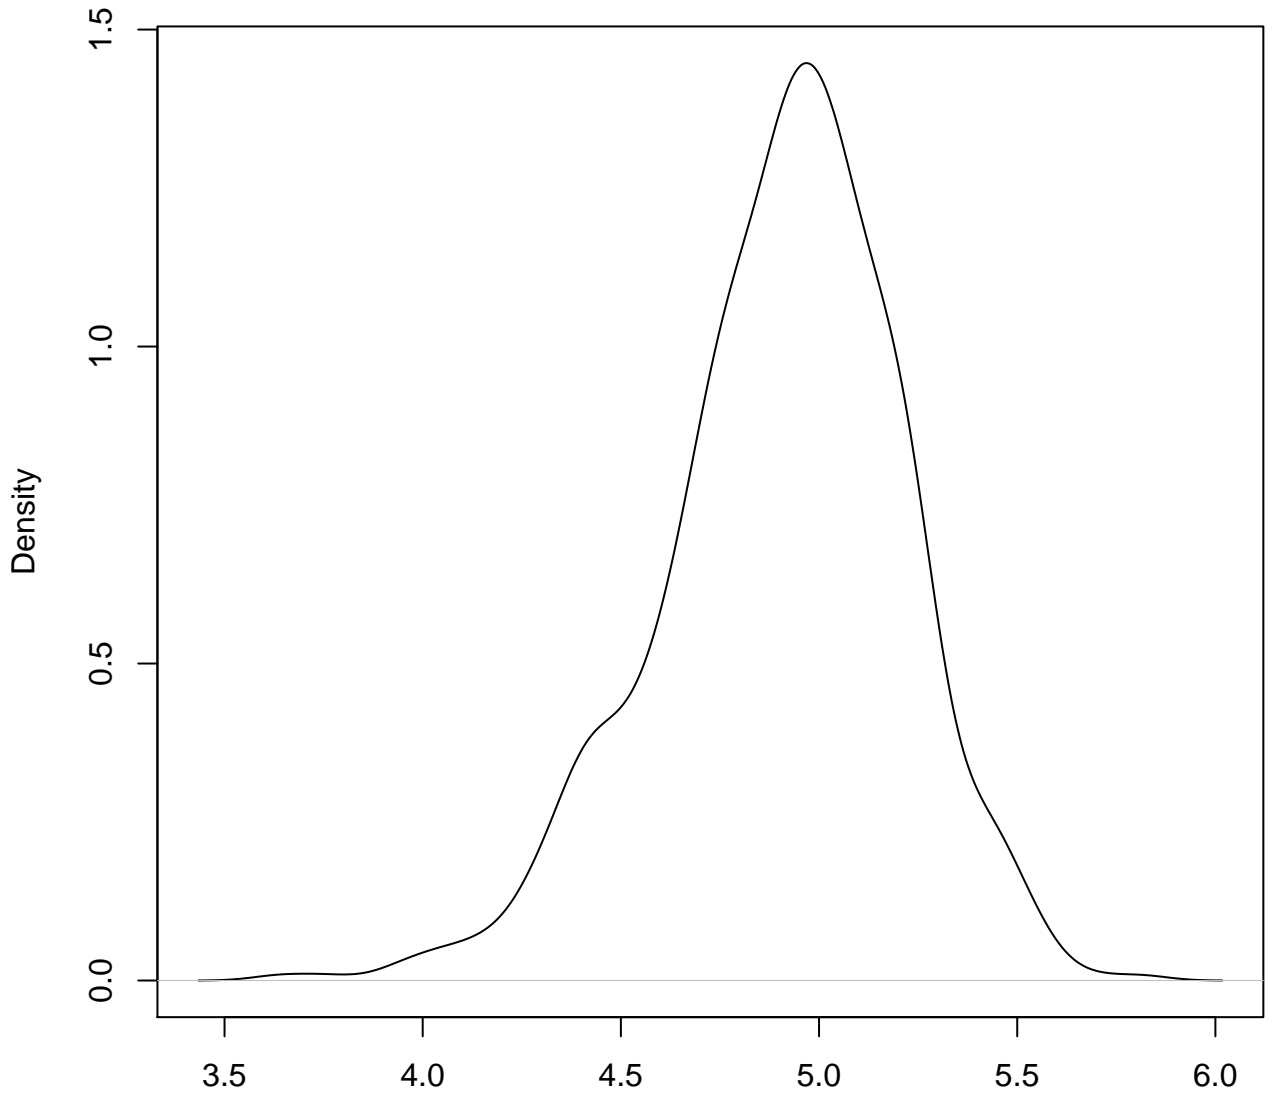

# Pre-adjusted DDR1 distribution

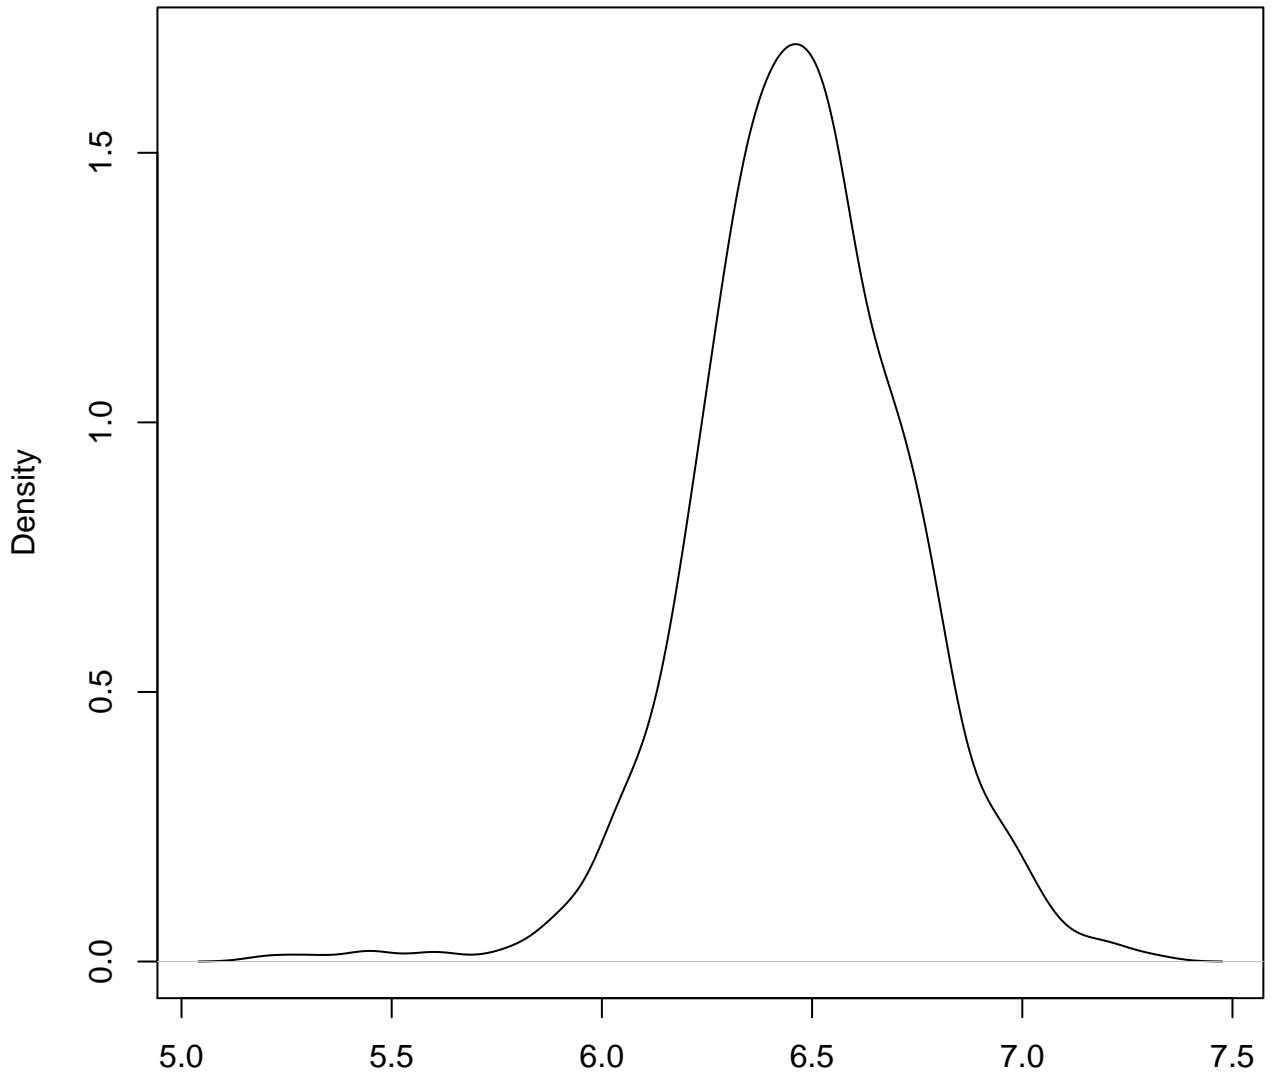



# Pre-adjusted JAM-B distribution

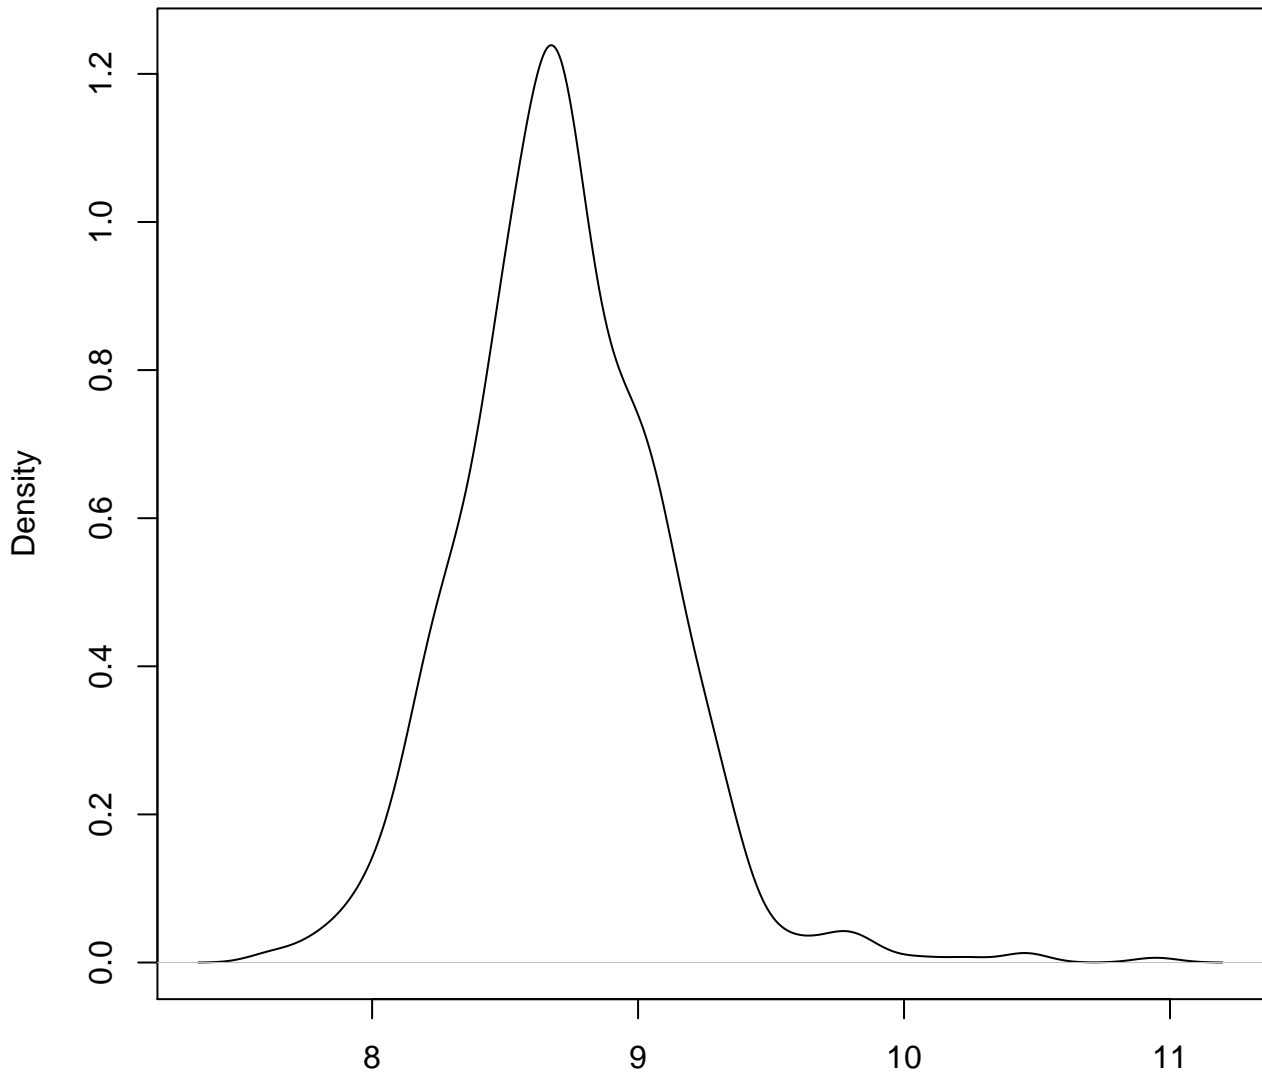

# Pre-adjusted CTSS distribution

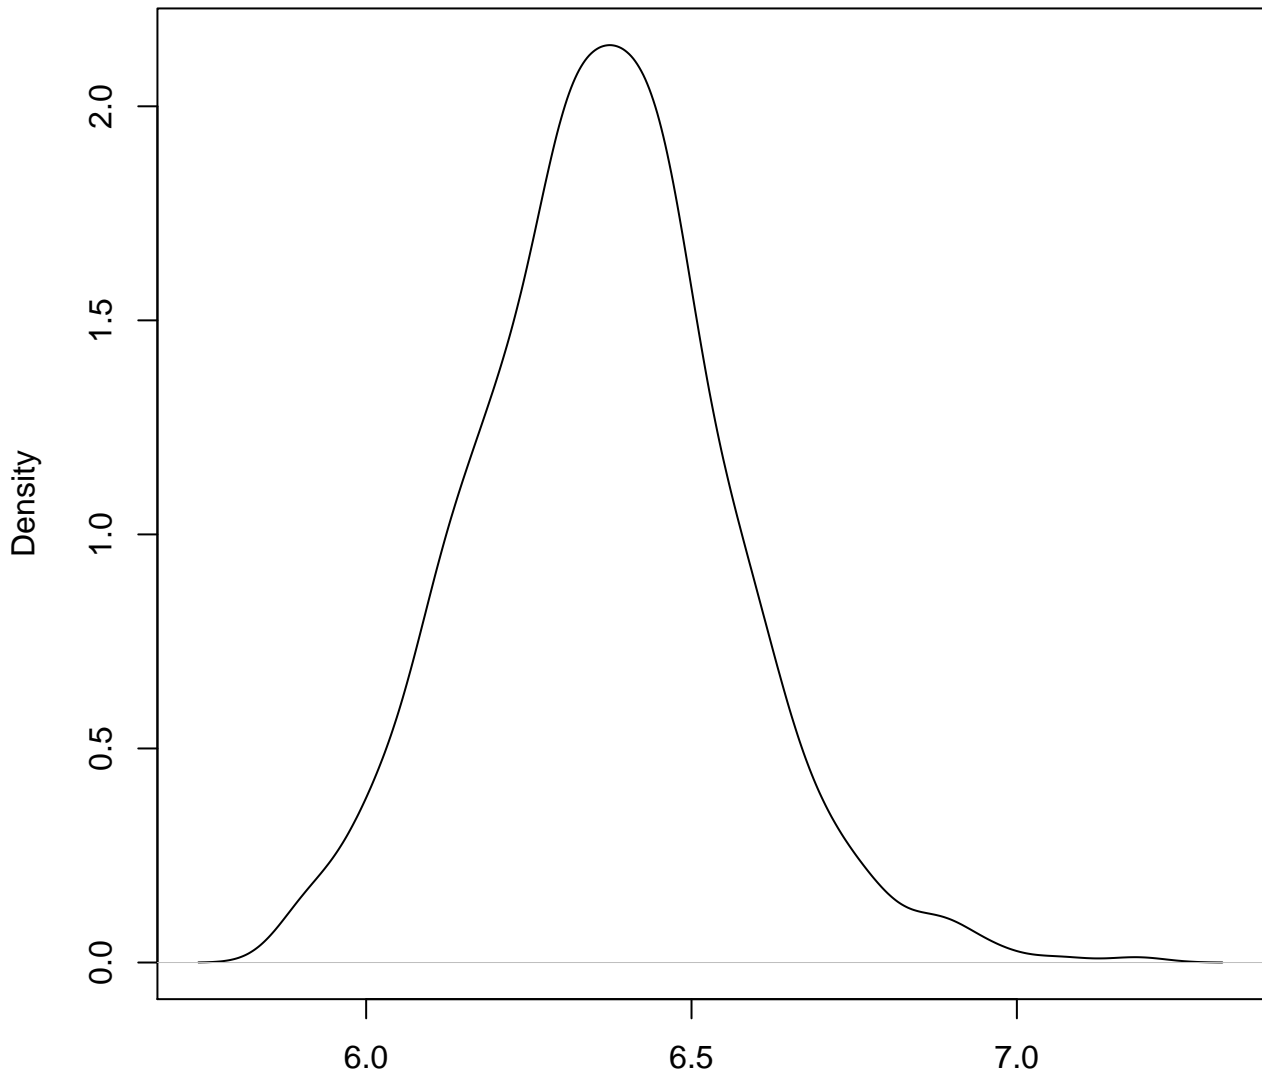

# Pre-adjusted N-CDase distribution

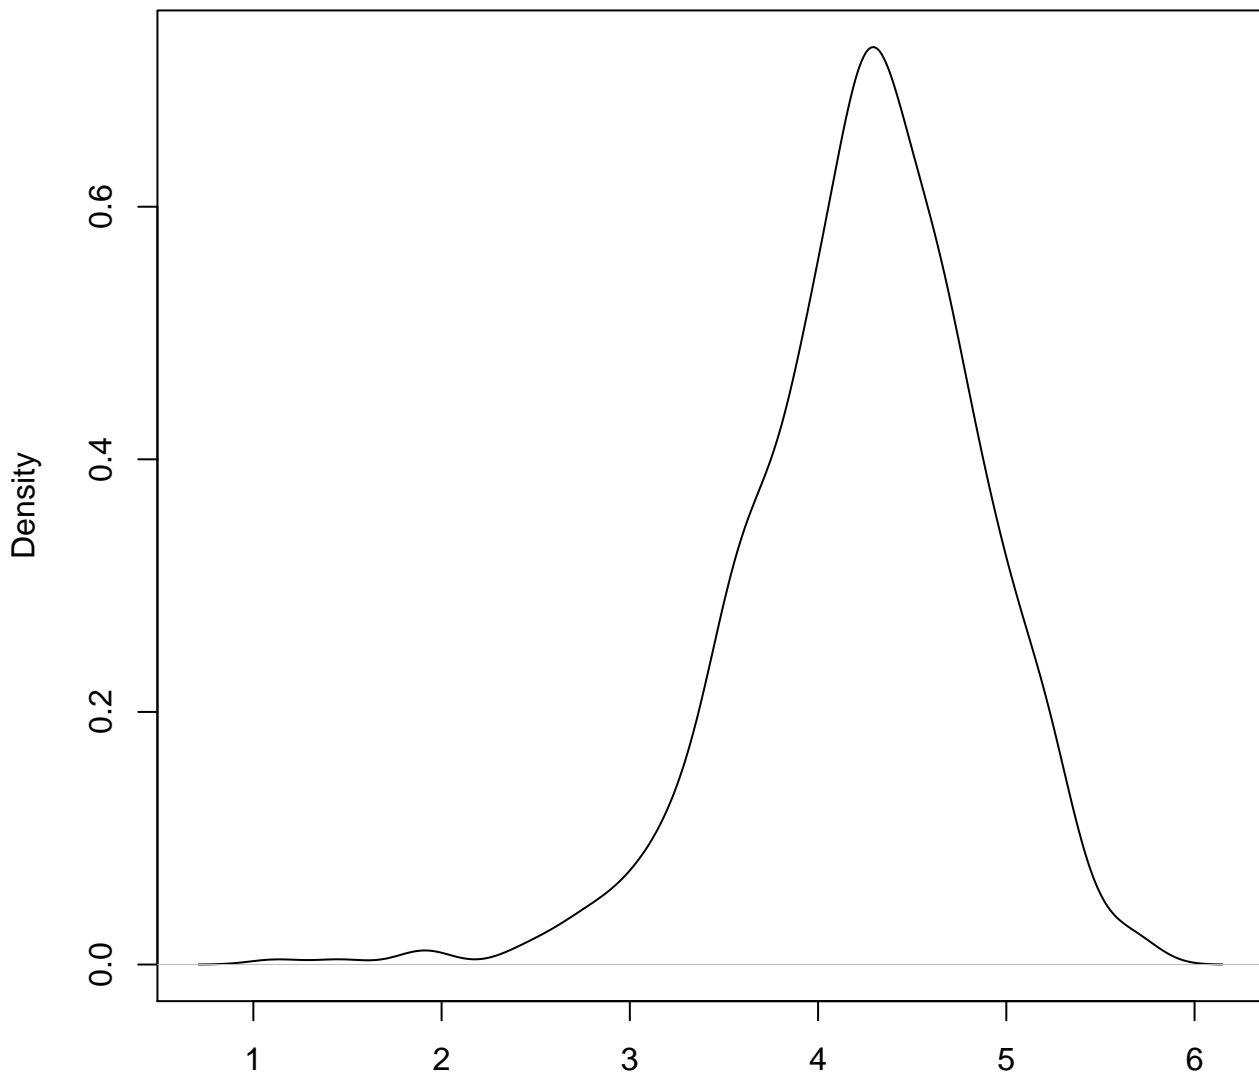

# Pre-adjusted NAAA distribution

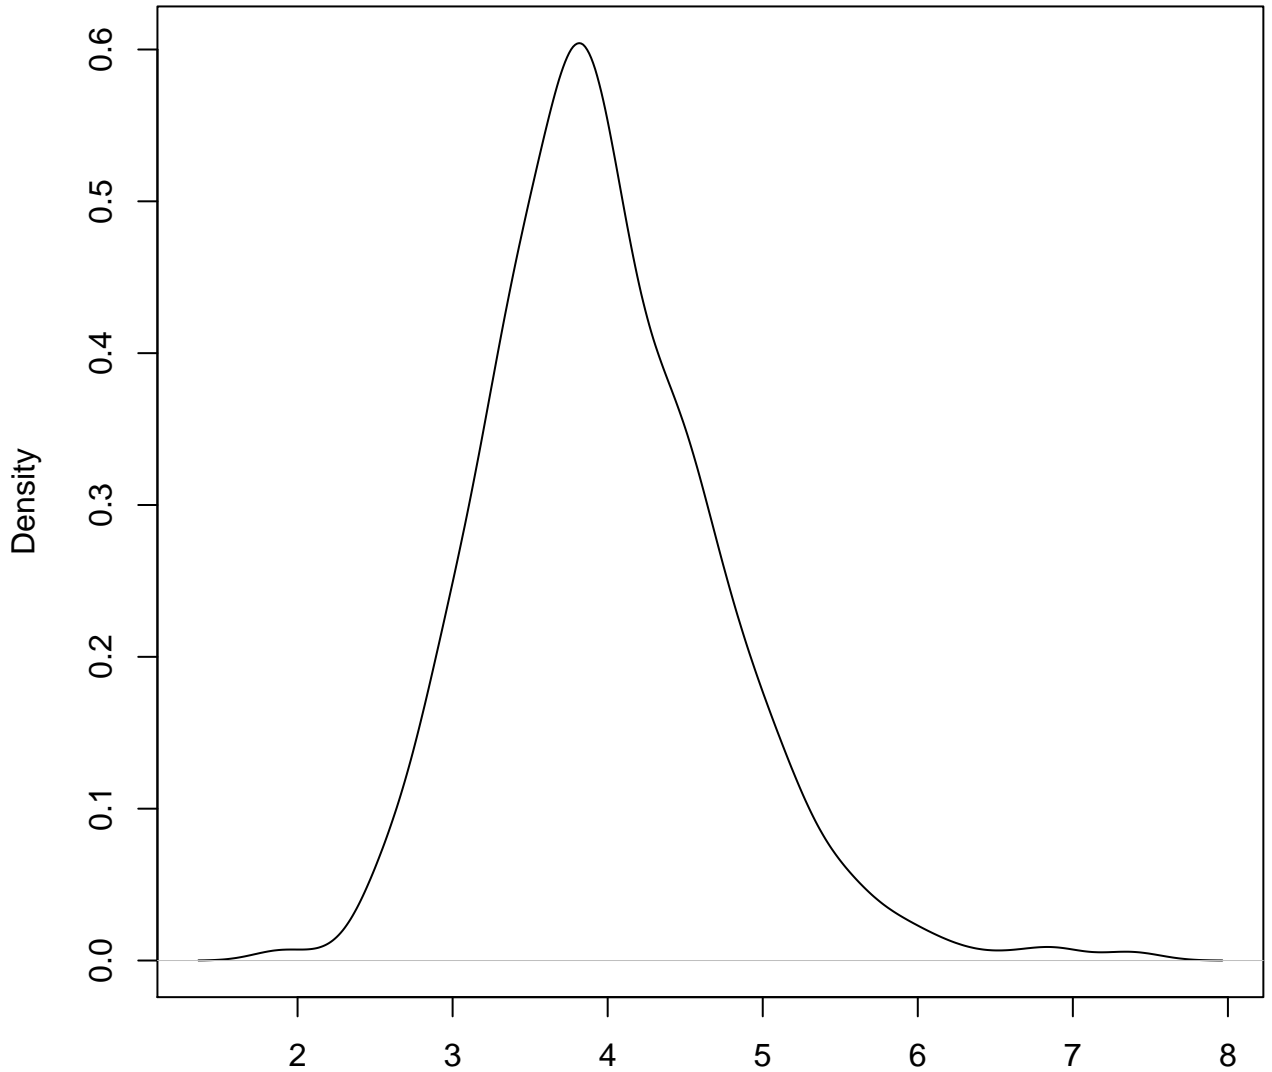

# Pre-adjusted N2DL-2 distribution

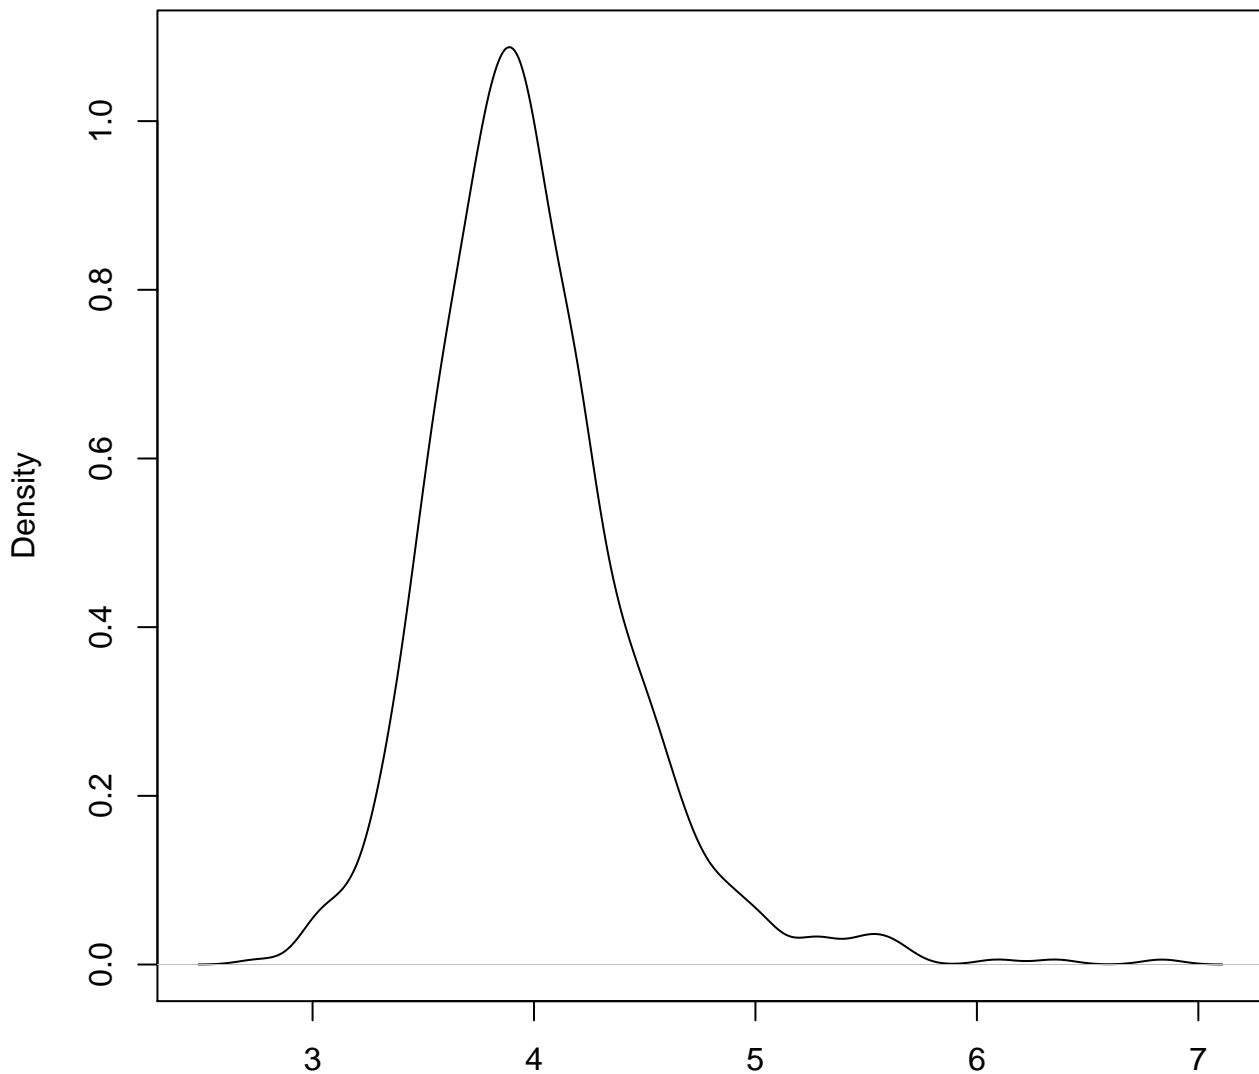

# Pre-adjusted PLXNB1 distribution

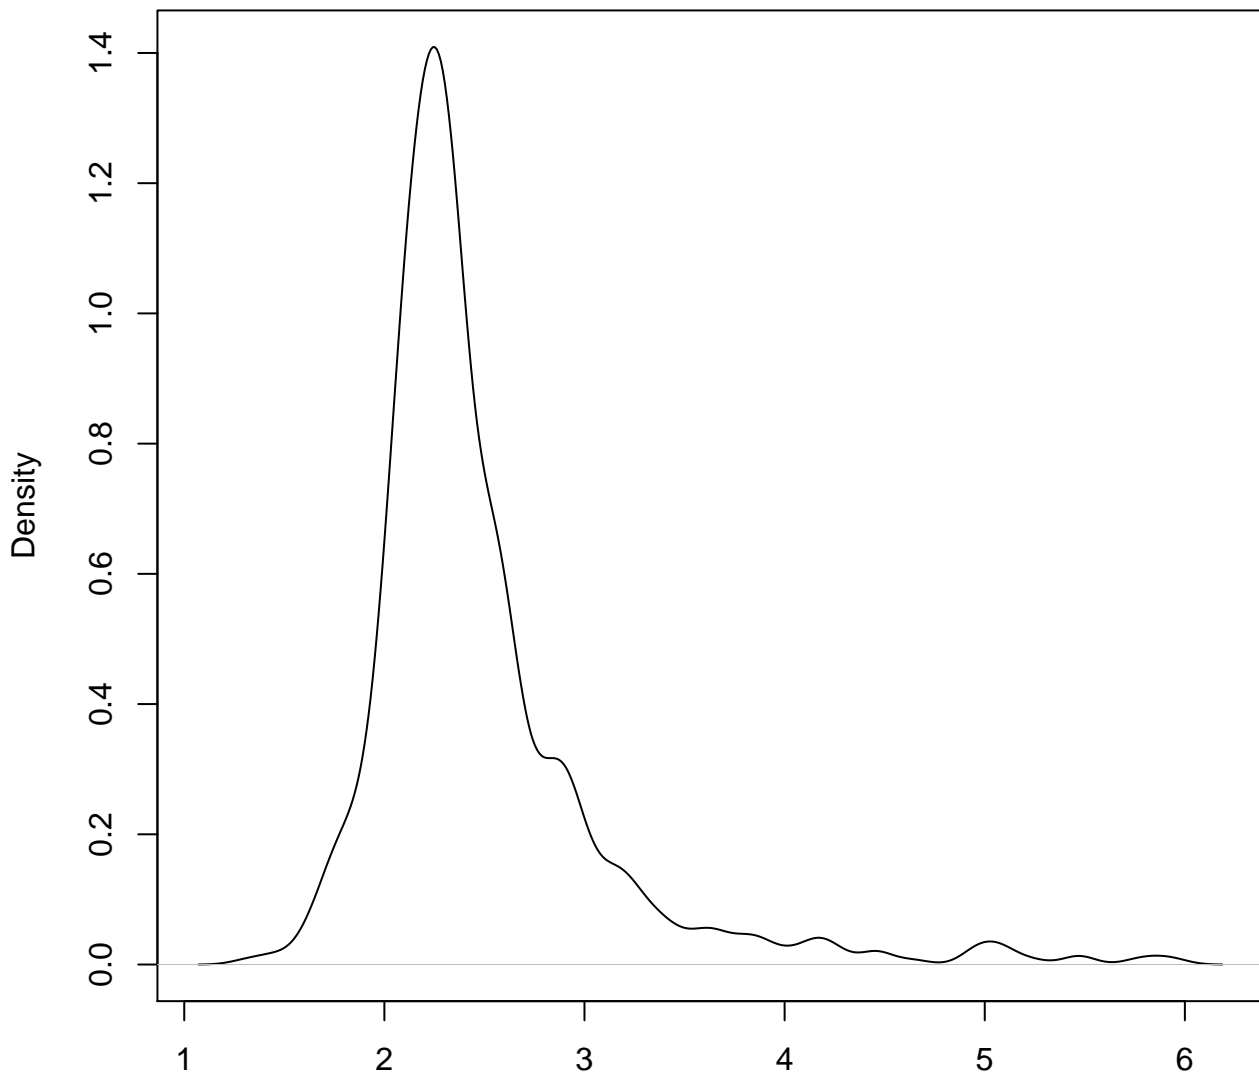

# Pre-adjusted TNFRSF21 distribution

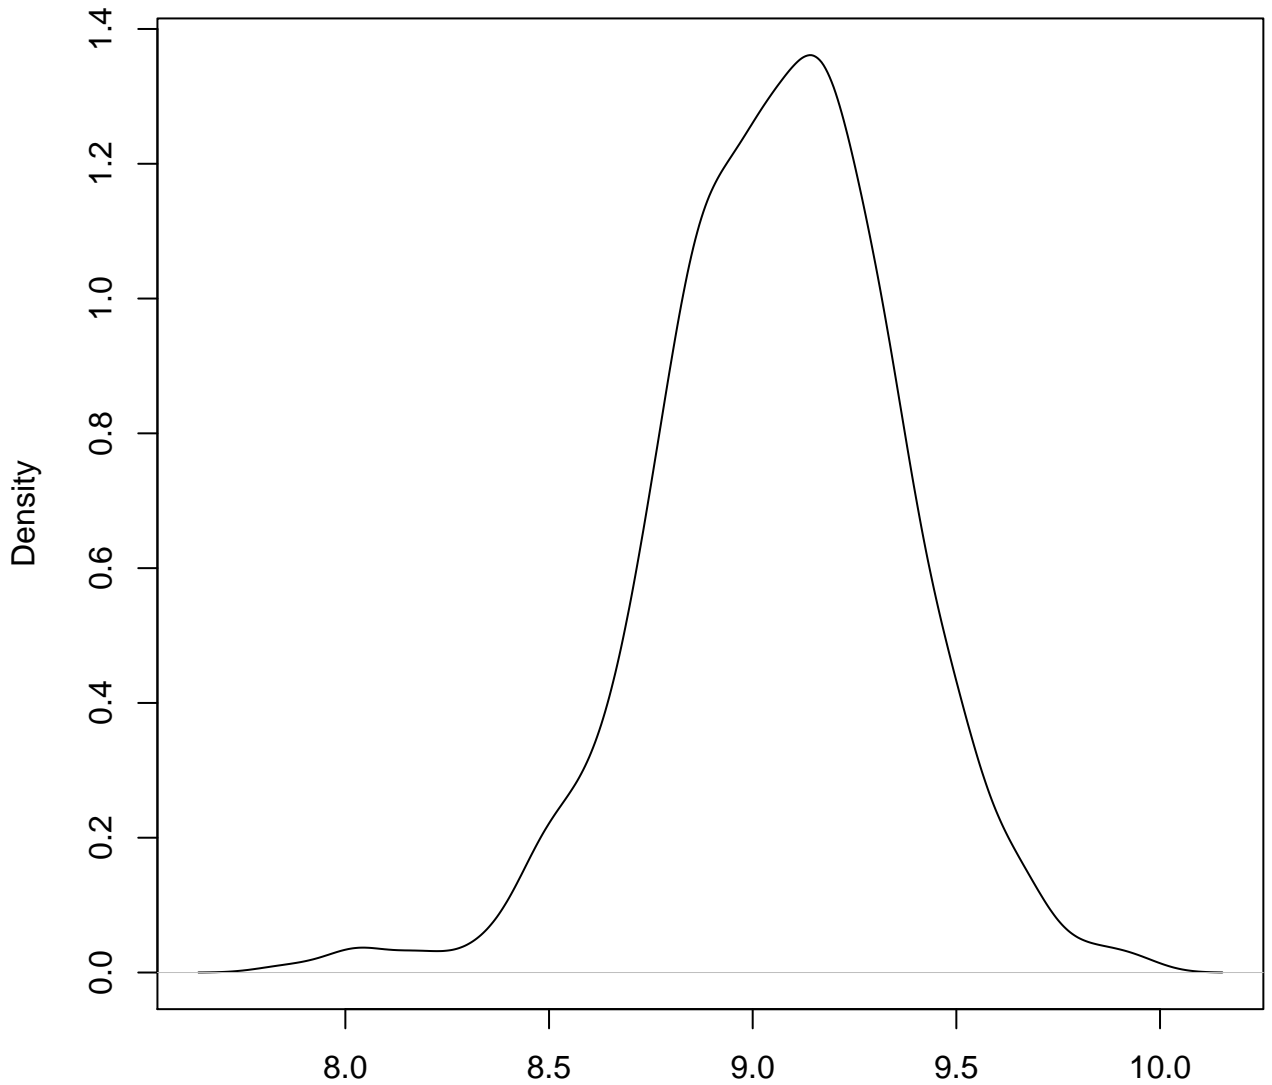

# Pre-adjusted CLM-1 distribution

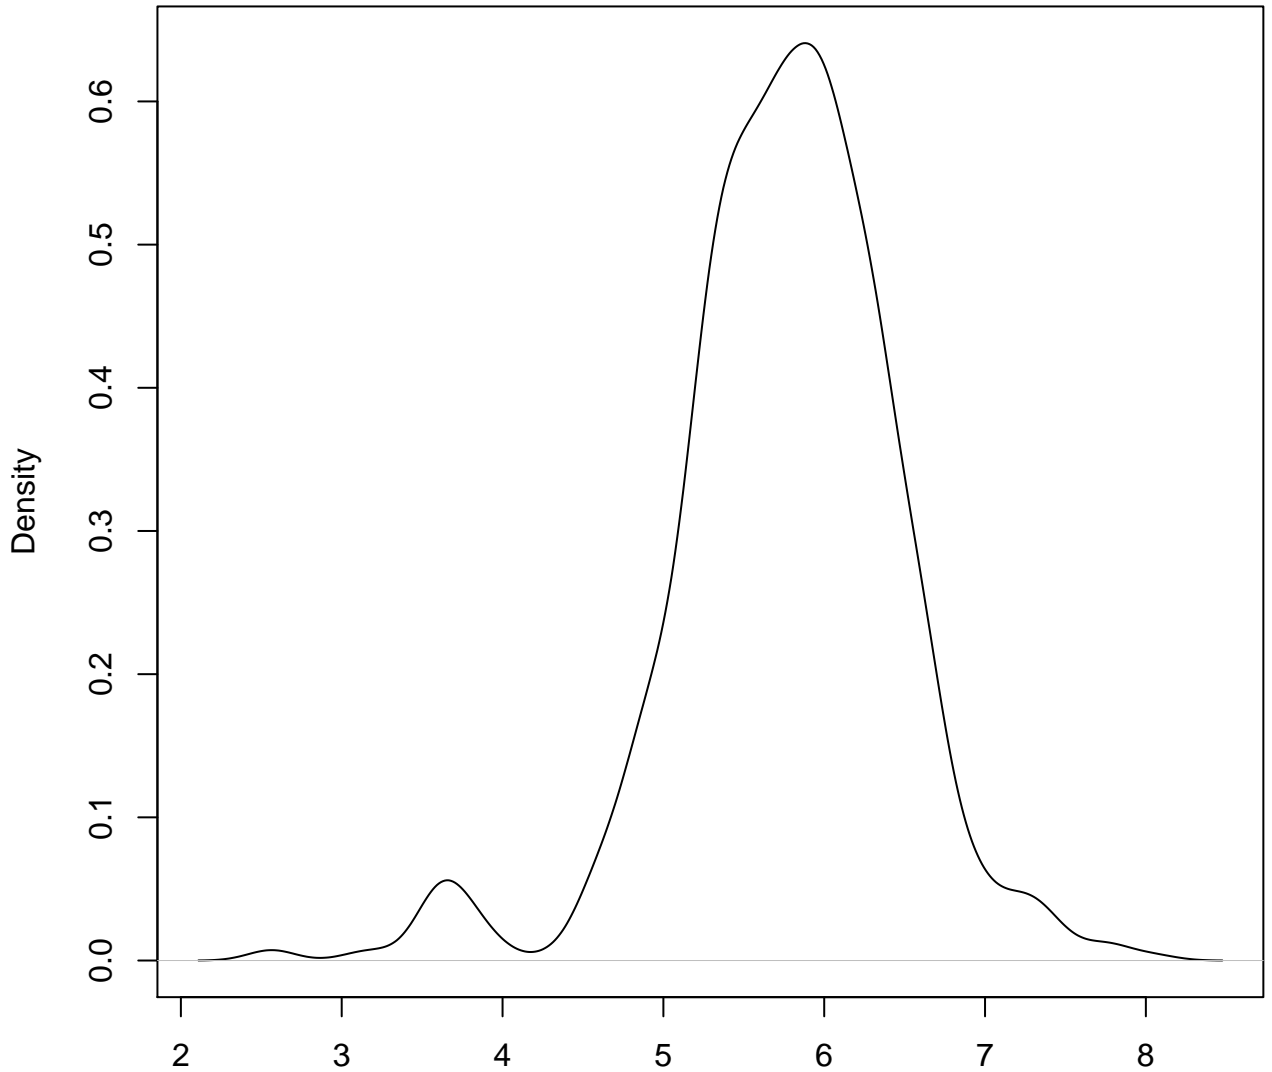



# Pre-adjusted SPOCK1 distribution

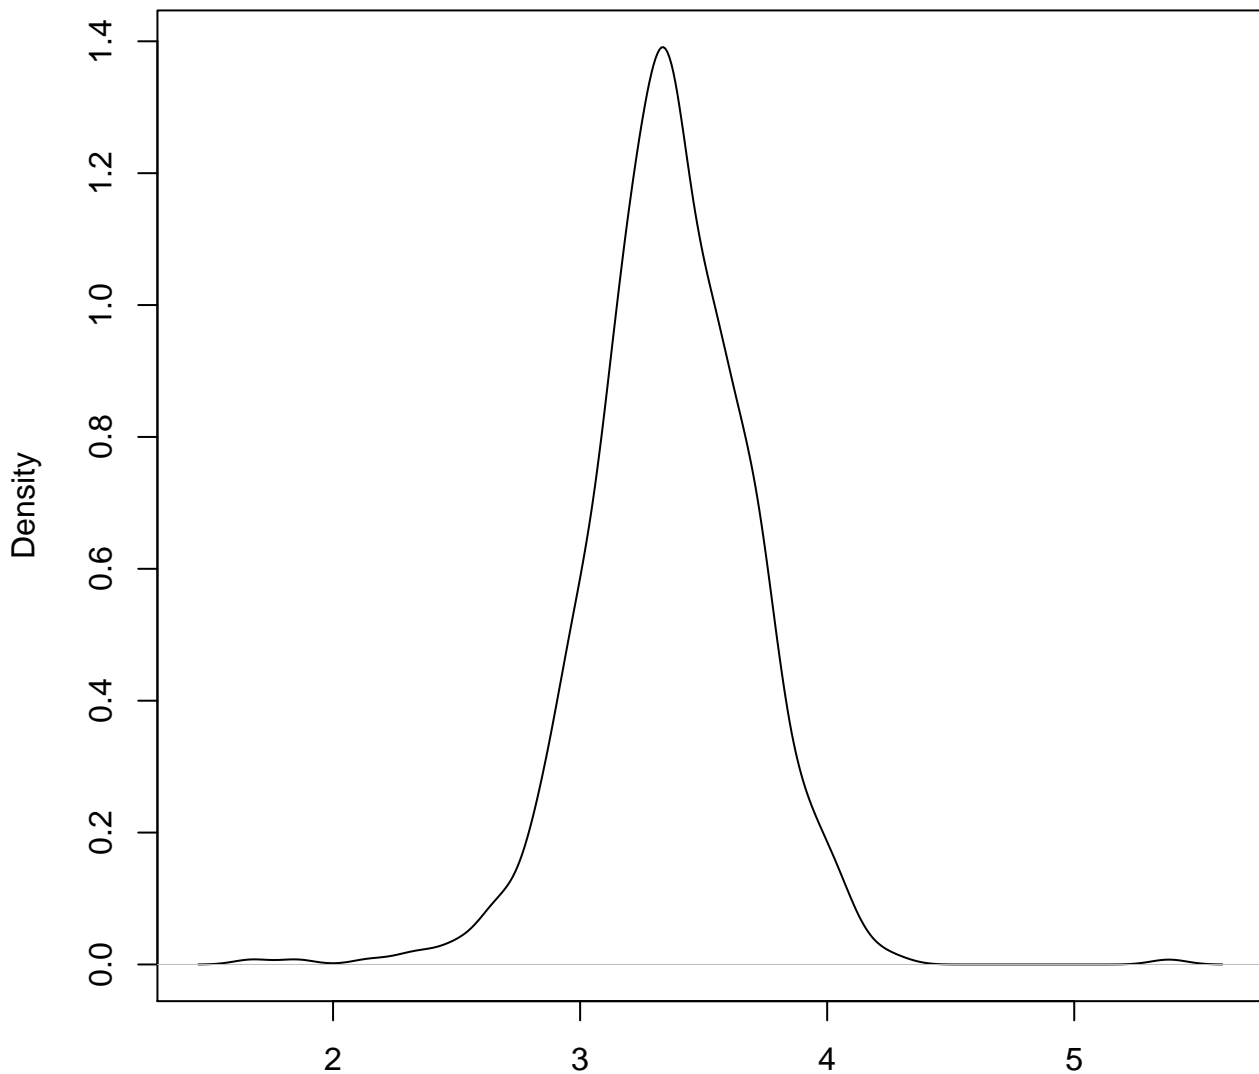

# Pre-adjusted IL12 distribution

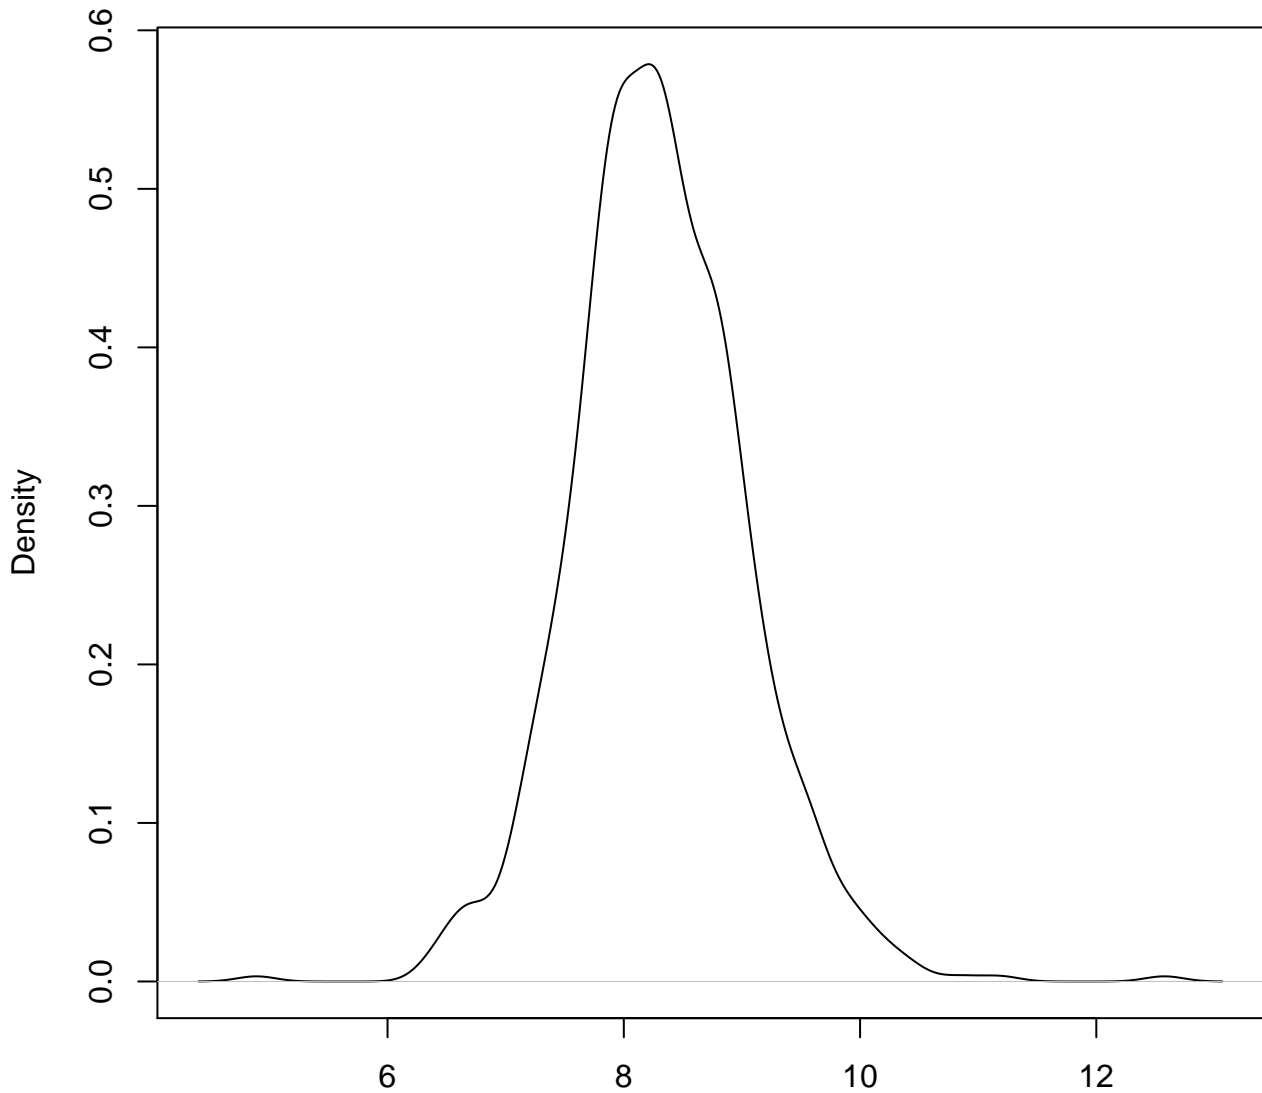

# Pre-adjusted Dkk-4 distribution

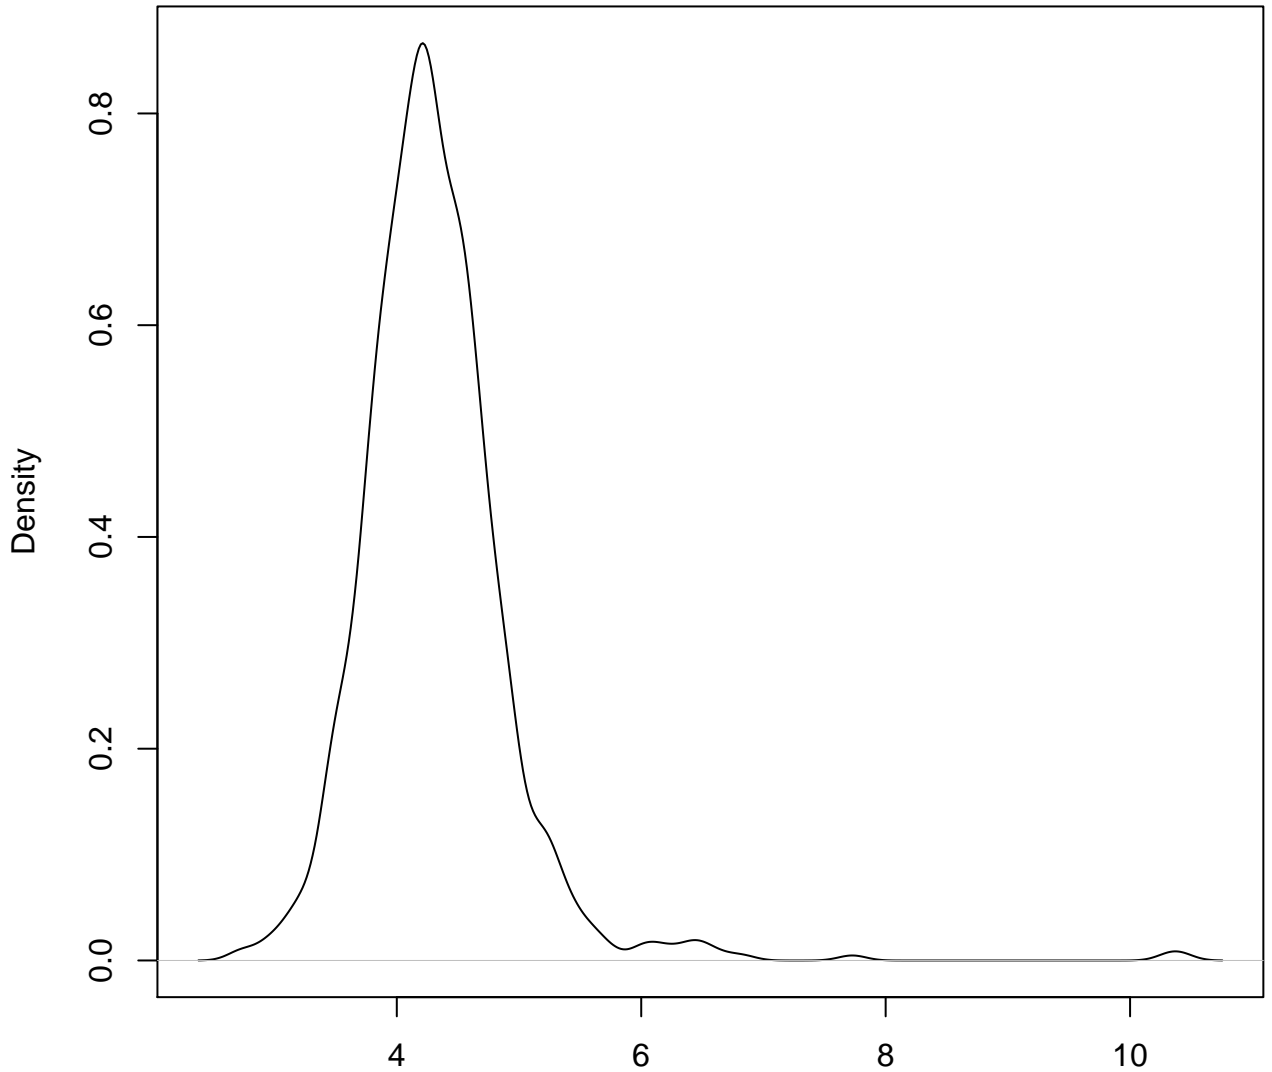

# Pre-adjusted EDA2R distribution

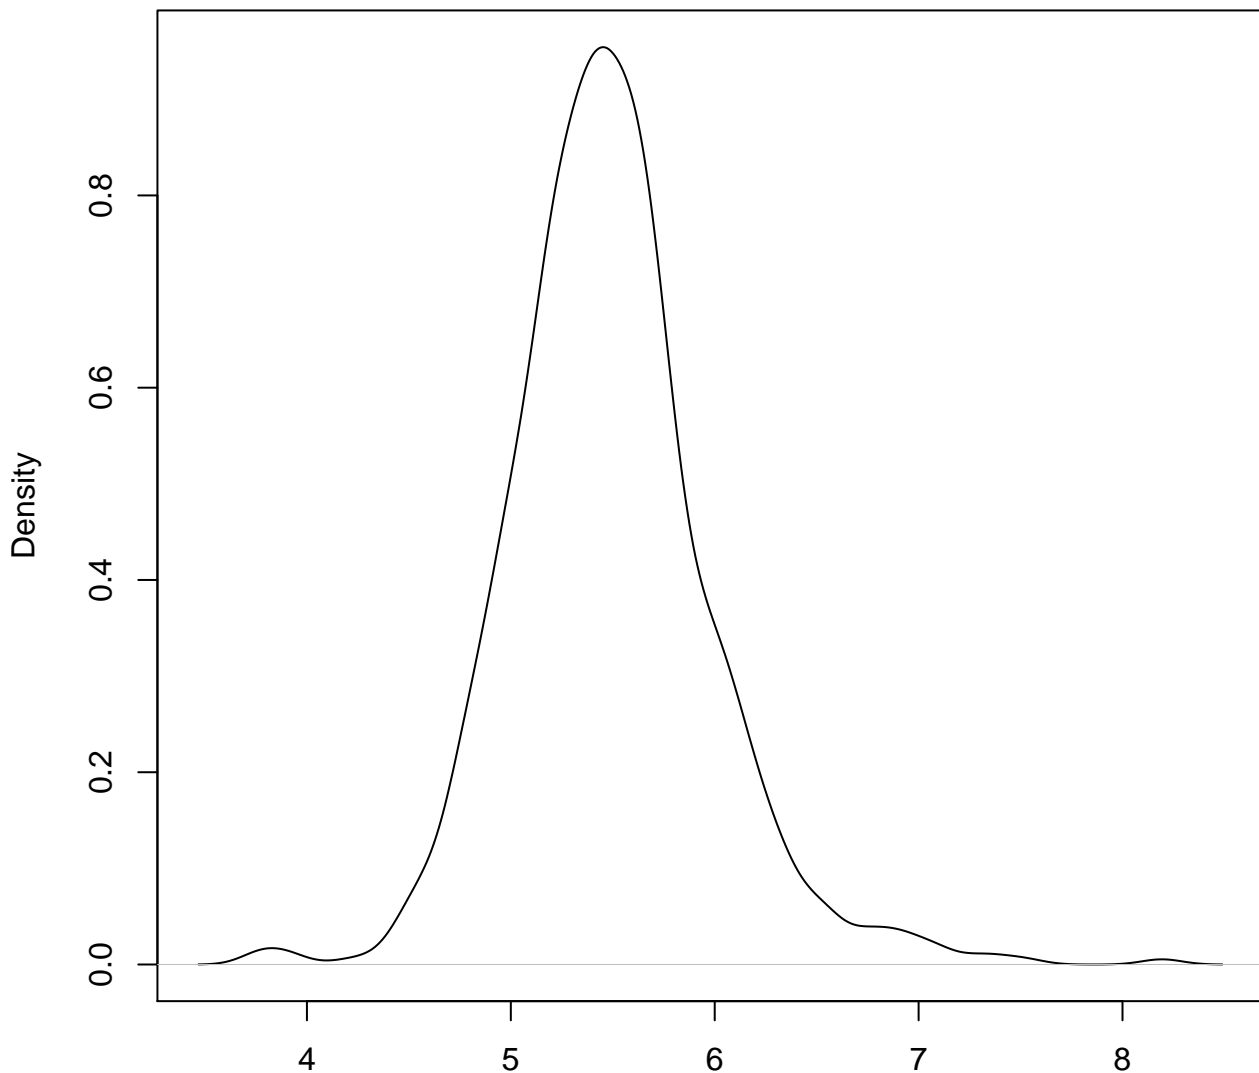

# Pre-adjusted LAT distribution

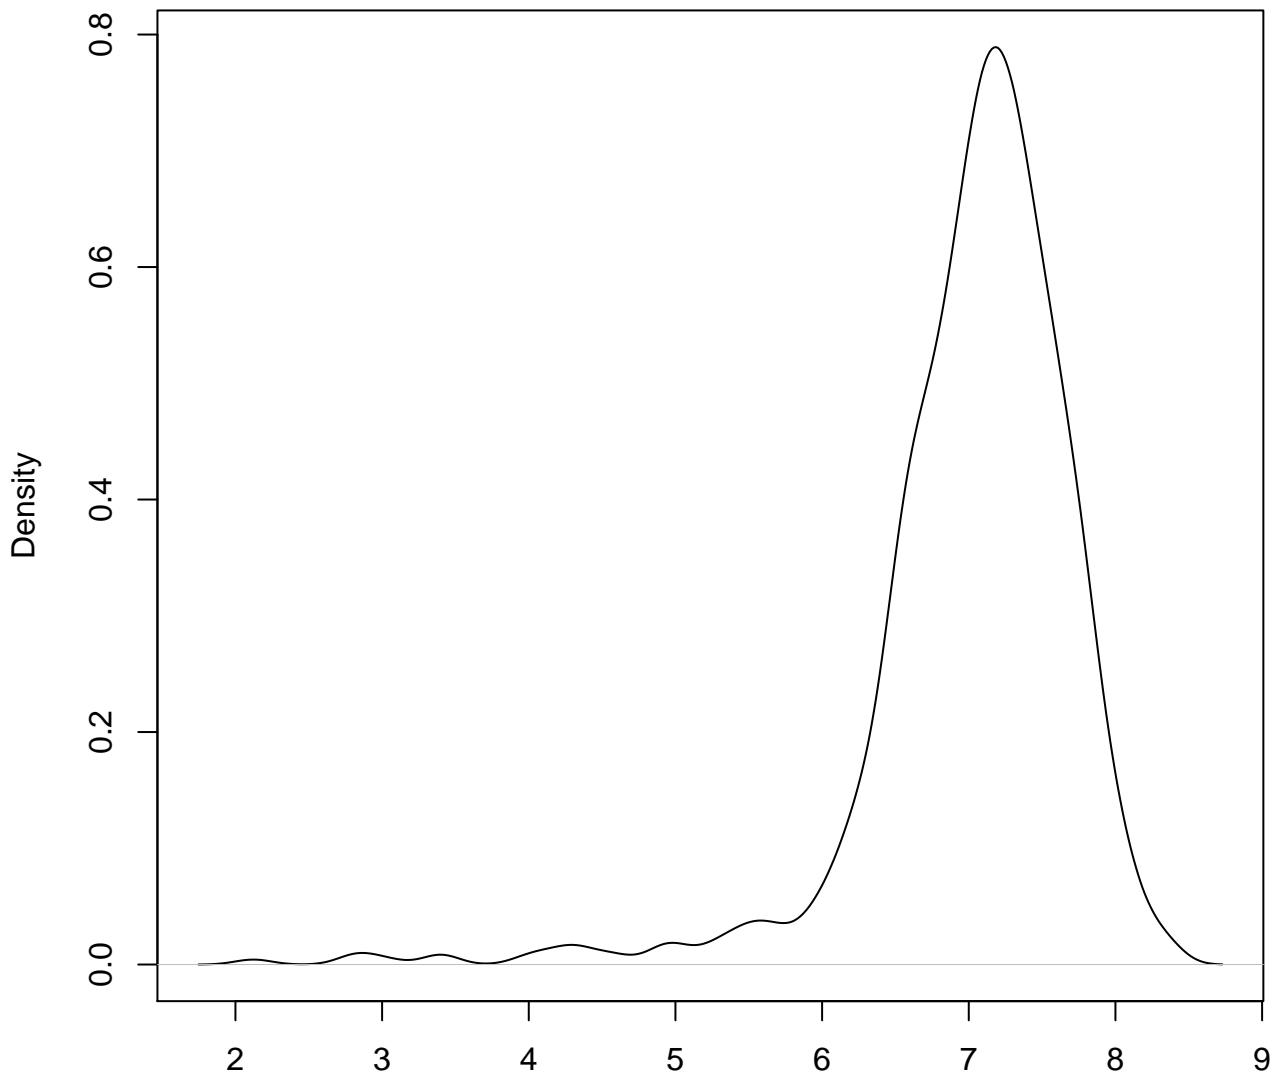

# Pre-adjusted NTRK3 distribution

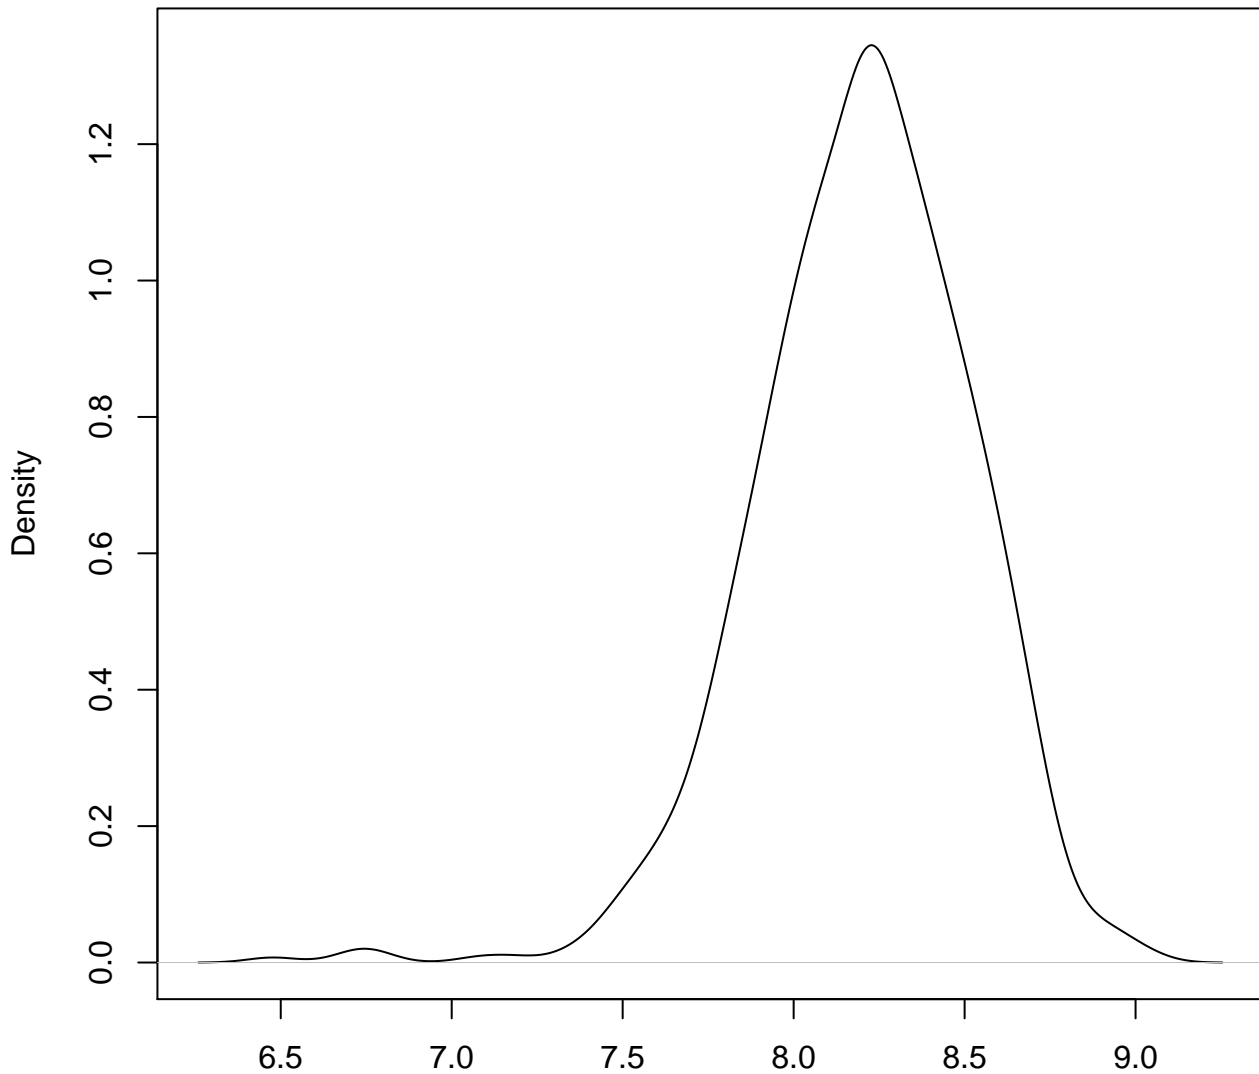

# Pre-adjusted LAIR-2 distribution

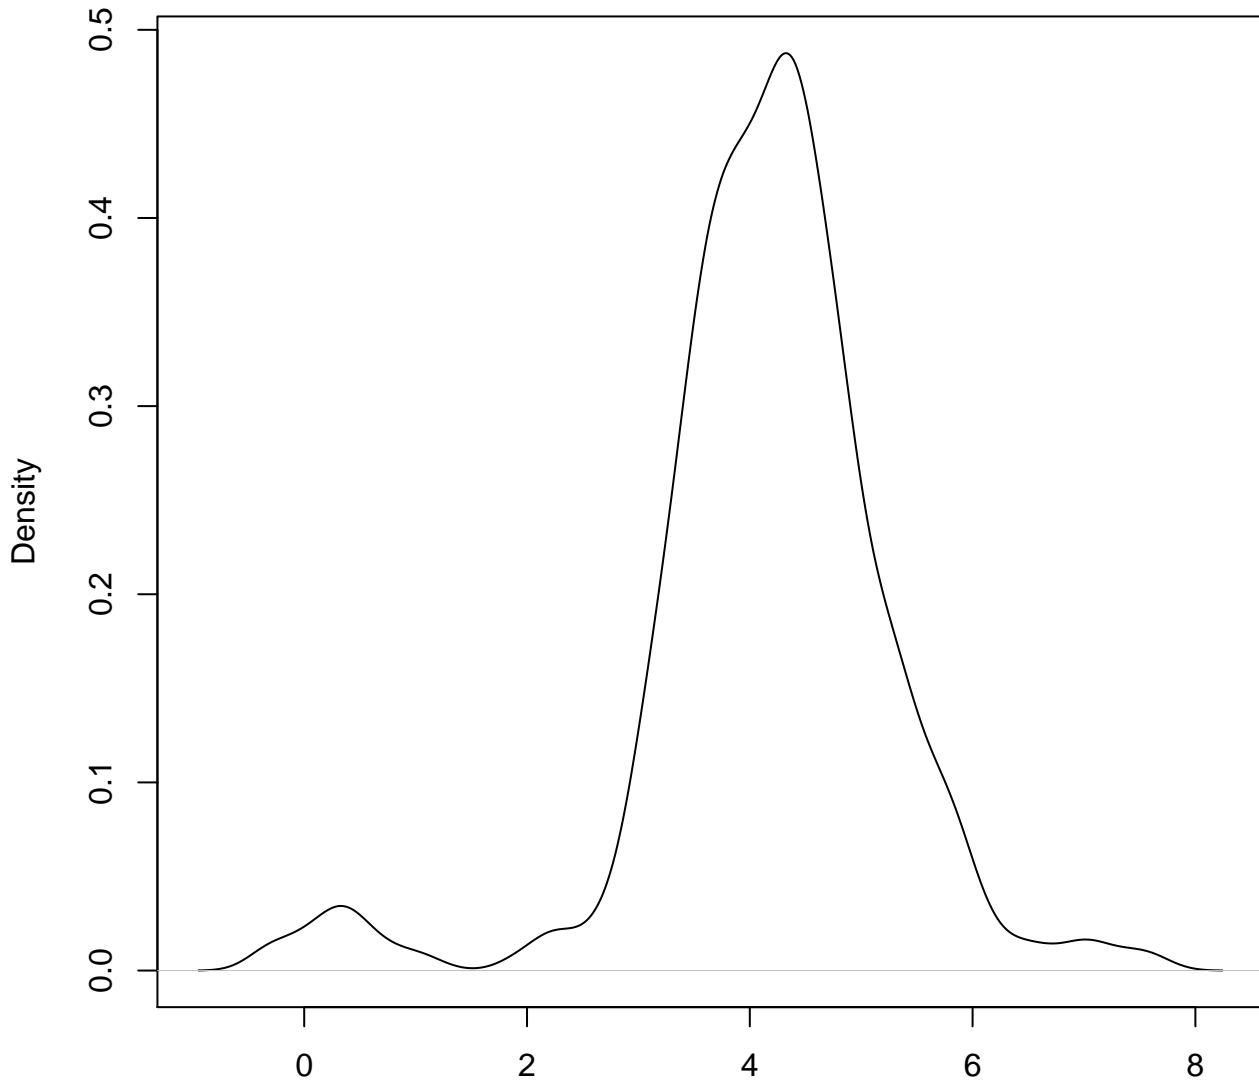

# Pre-adjusted MANF distribution

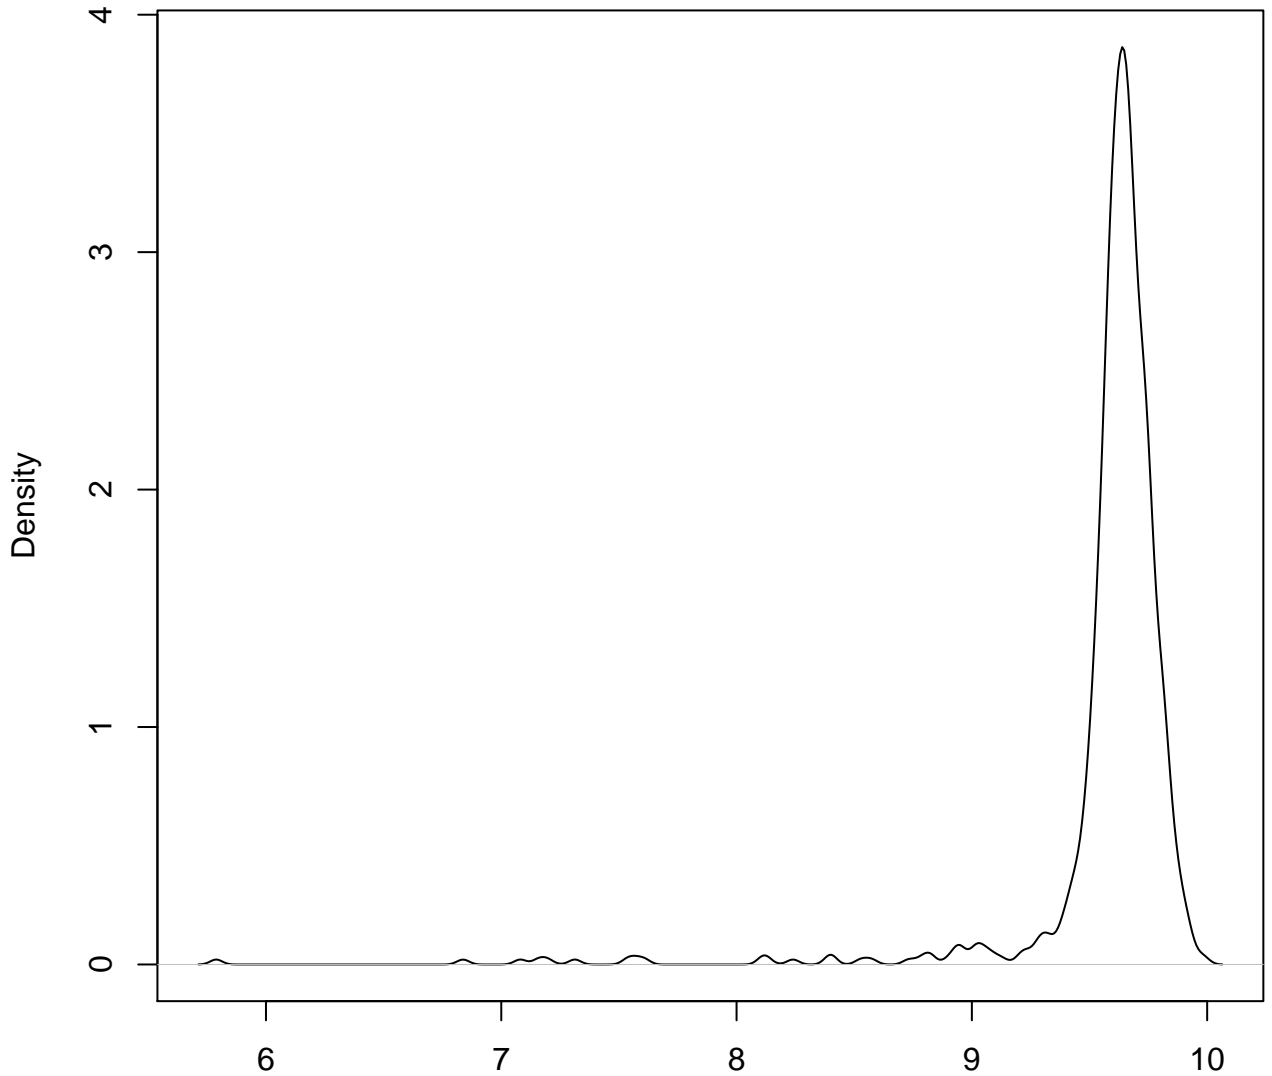



# Pre-adjusted TN-R distribution

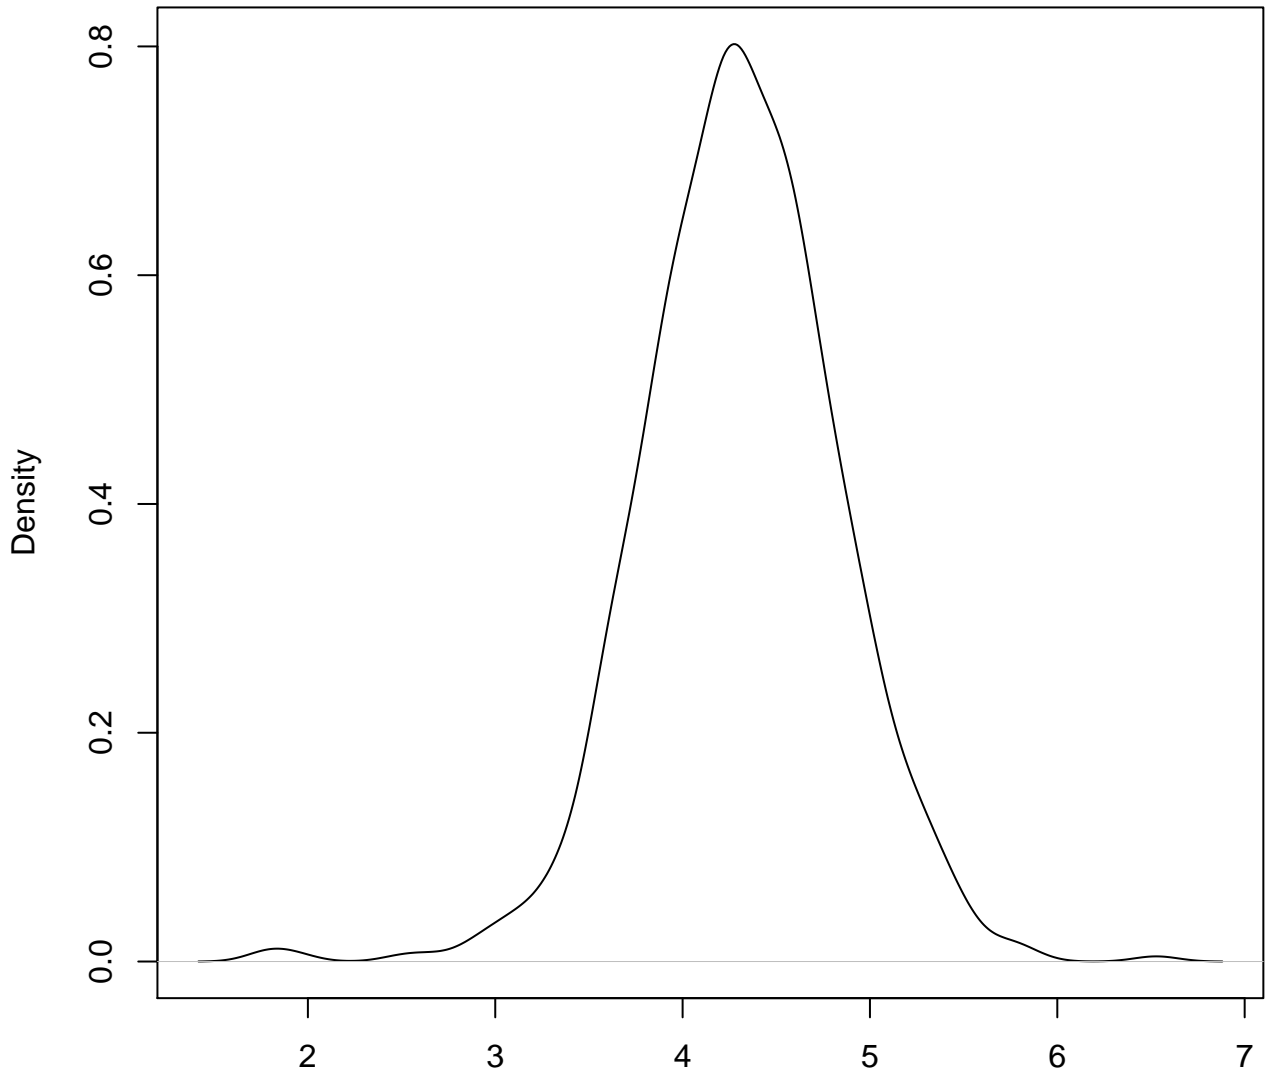

# Pre-adjusted CD200R1 distribution

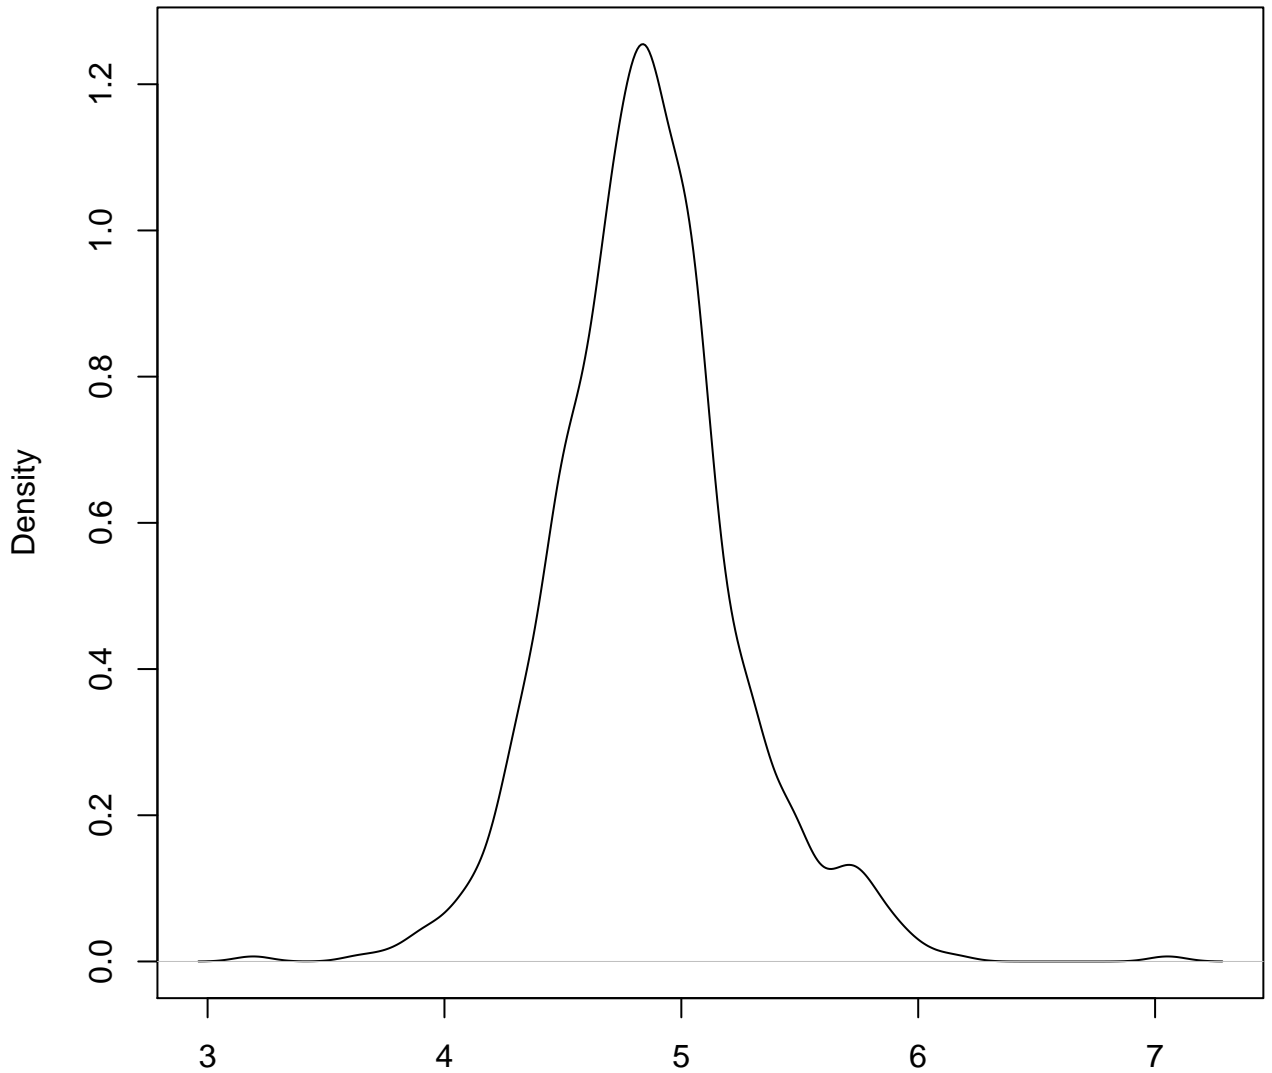

# Pre-adjusted Nr-CAM distribution

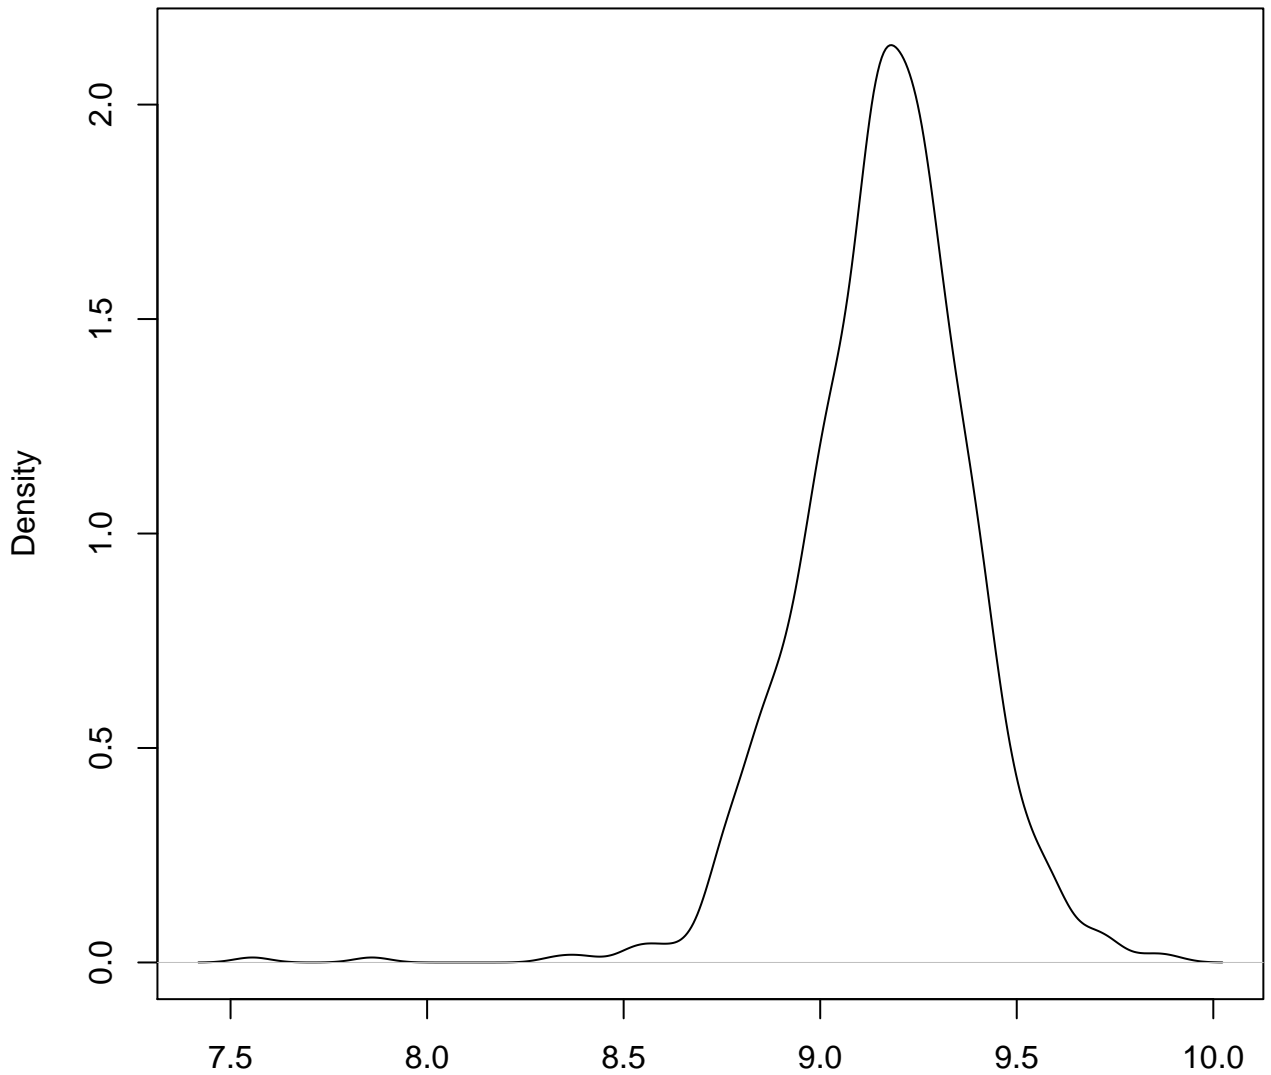

# Pre-adjusted KYNU distribution

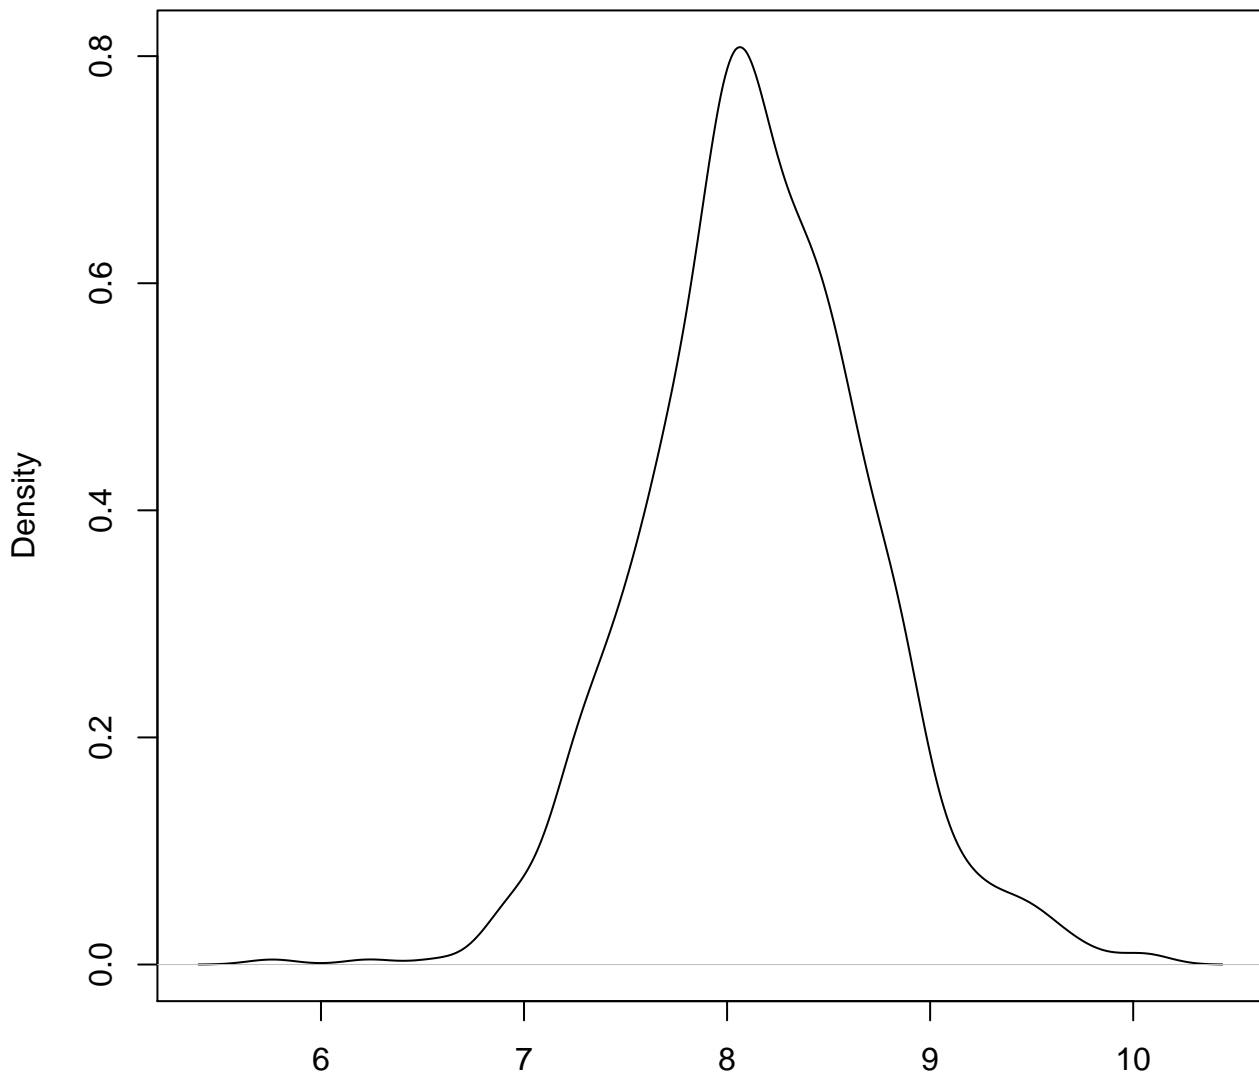

Supplement: 41467_2019_11177_MOESM11_ESM.pdf [file 41467_2019_11177_MOESM11_ESM.pdf]
