# Supplementary material for: Genome and epigenome wide studies of neurological protein biomarkers in the Lothian Birth Cohort 1936
Source: PubMed Central journal article supplement (PMC6639385; doi:10.1038/s41467-019-11177-x), 2019-07-18

# Transformed NMNAT1 distribution

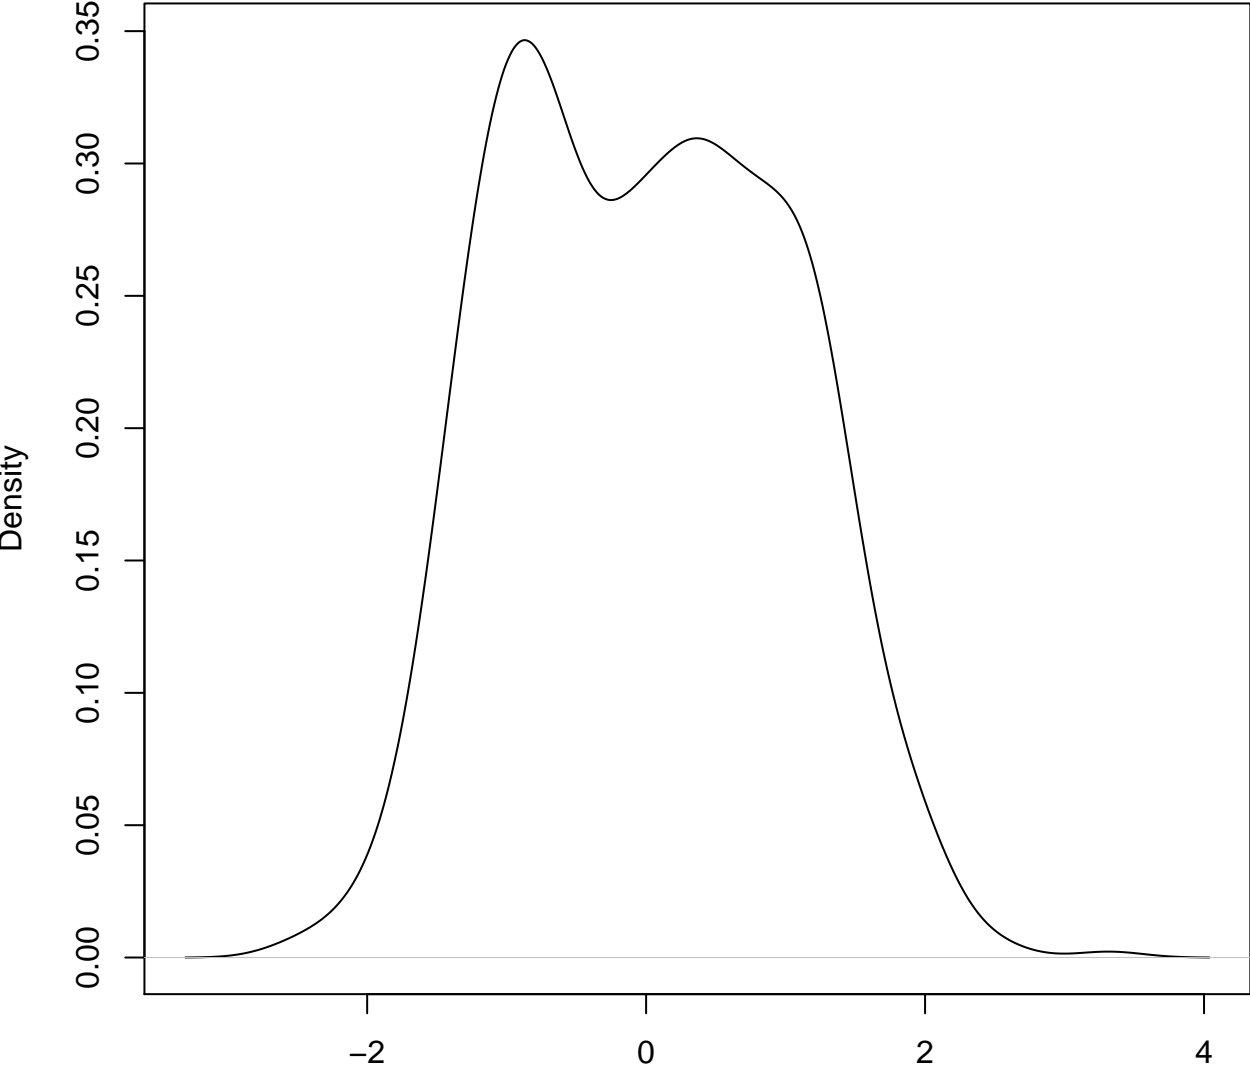

# Transformed NRP2 distribution

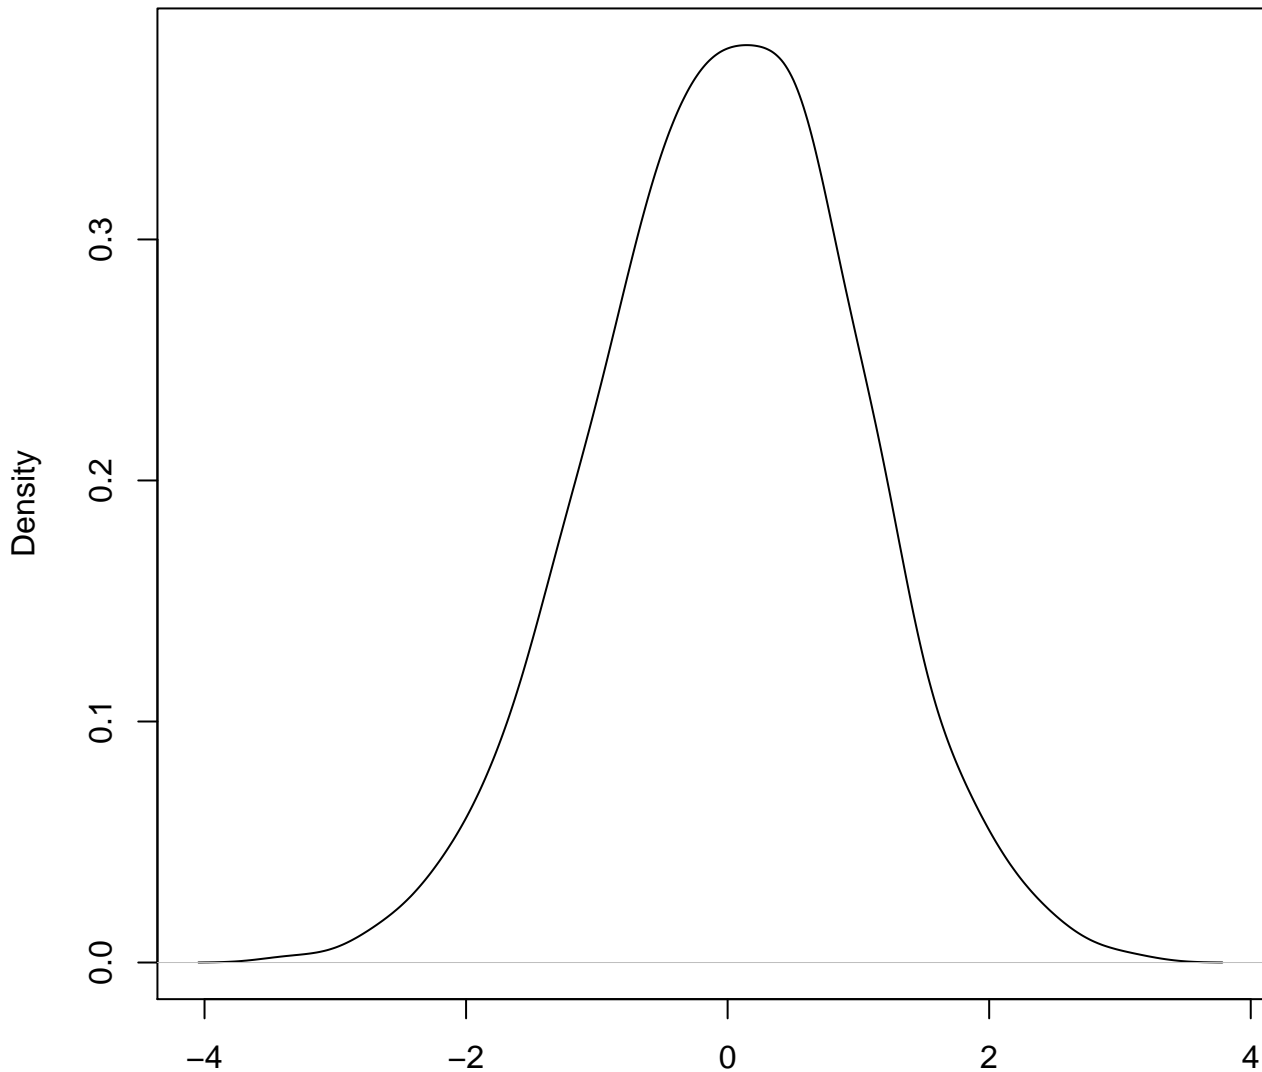

# Transformed MAPT distribution

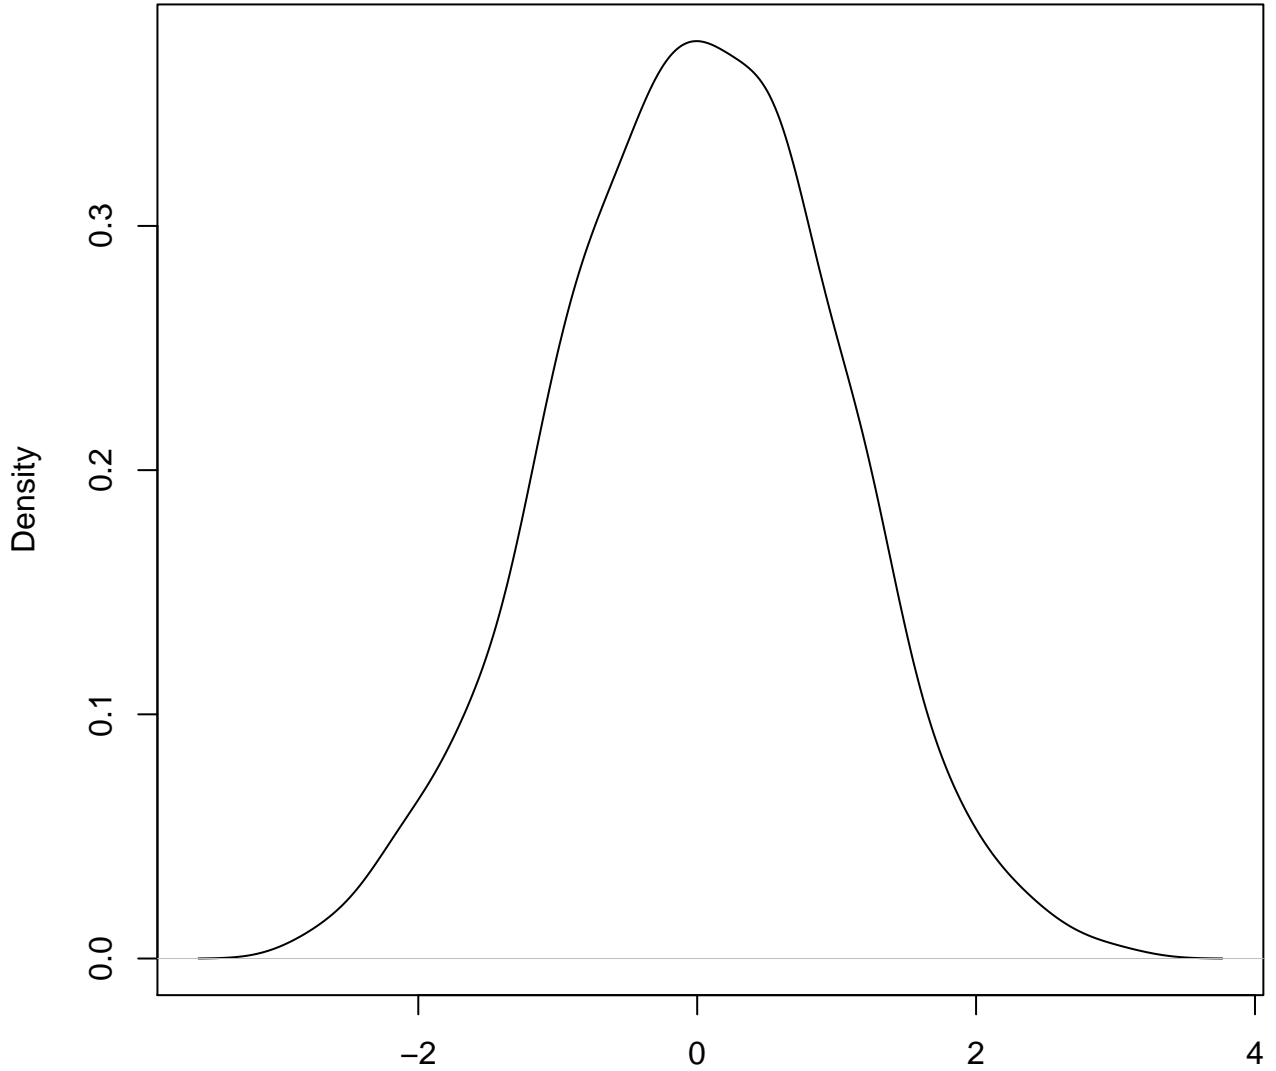

# Transformed CADM3 distribution

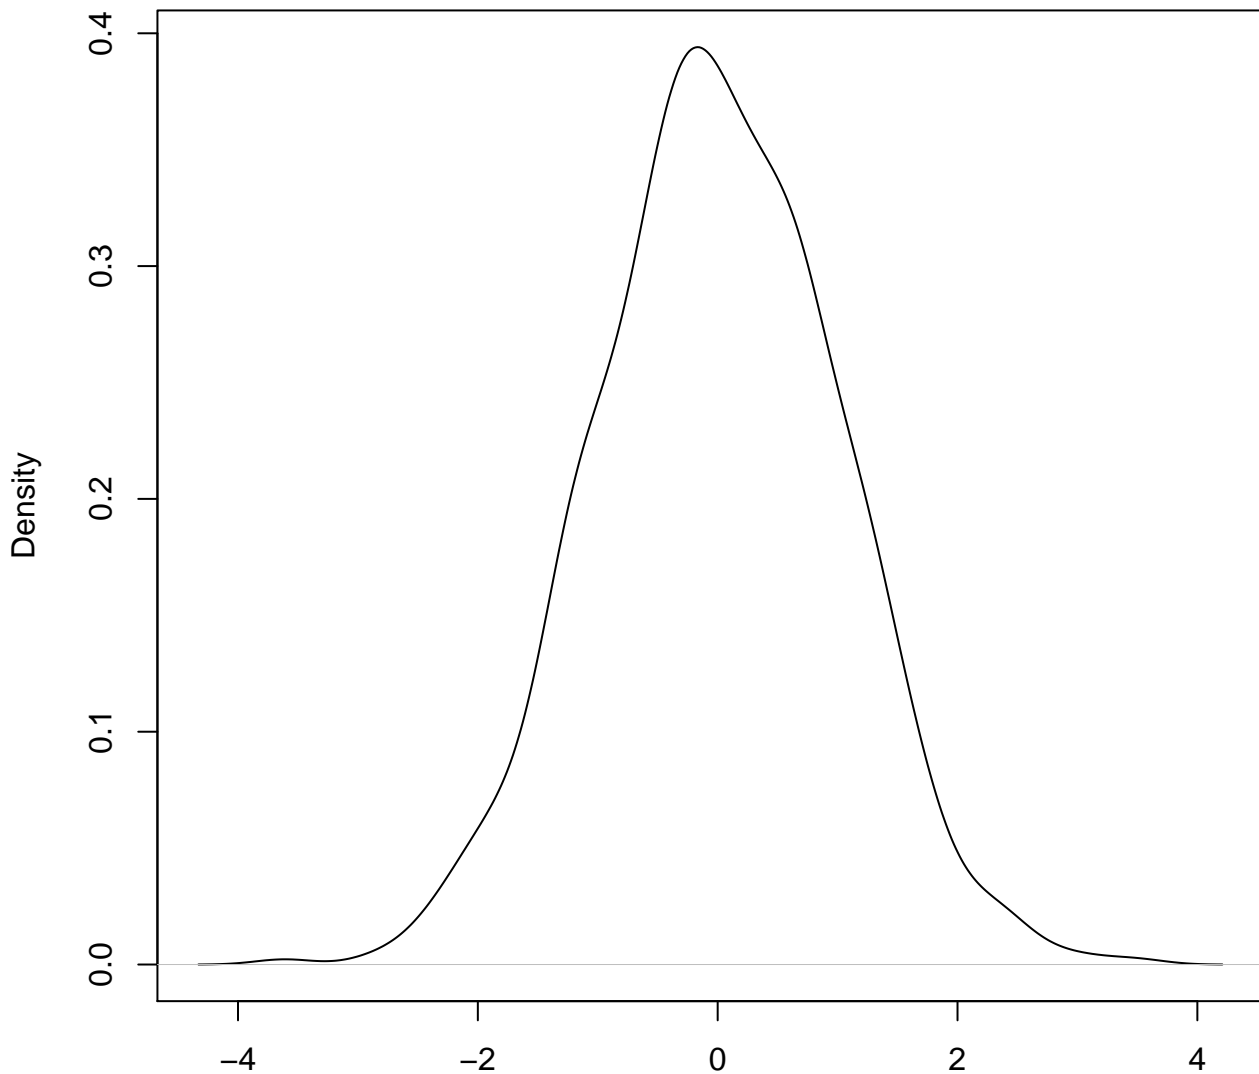

# Transformed GDNF distribution

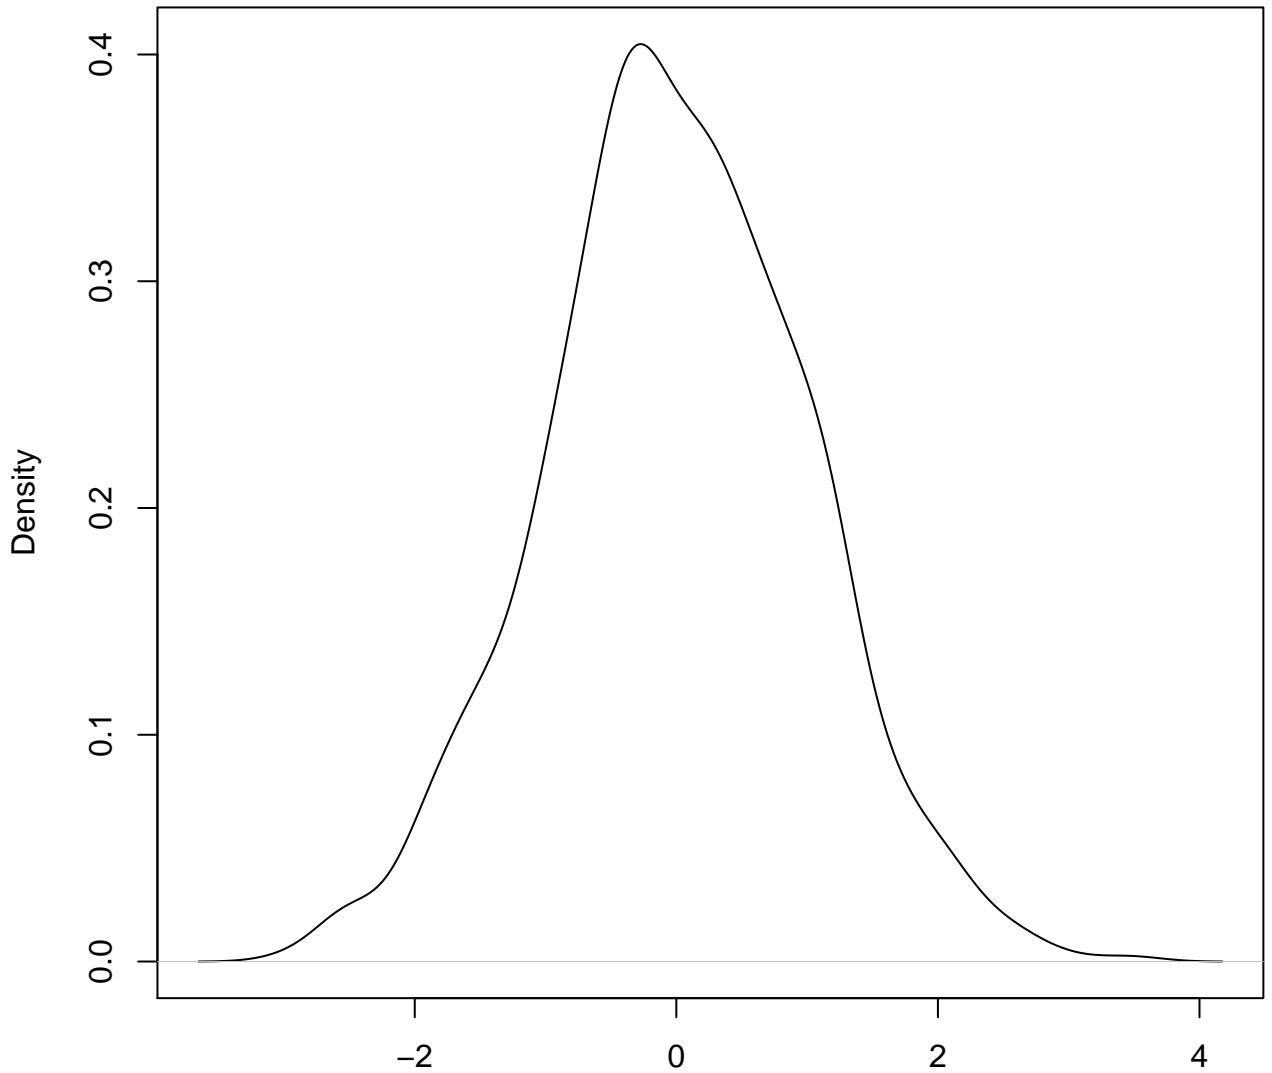

# Transformed UNC5C distribution

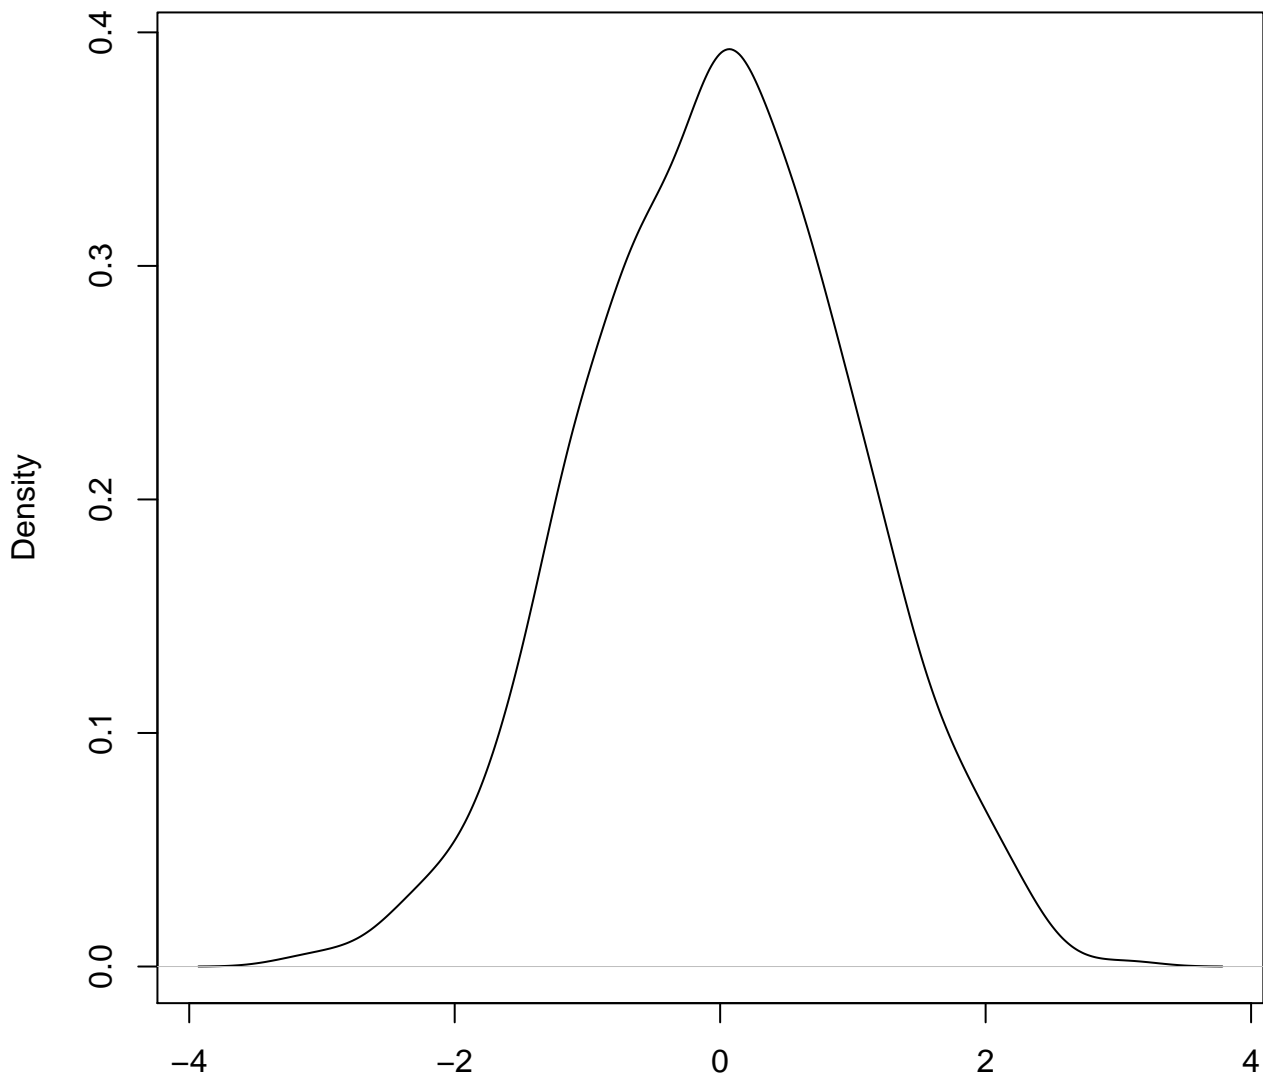

# Transformed VWC2 distribution

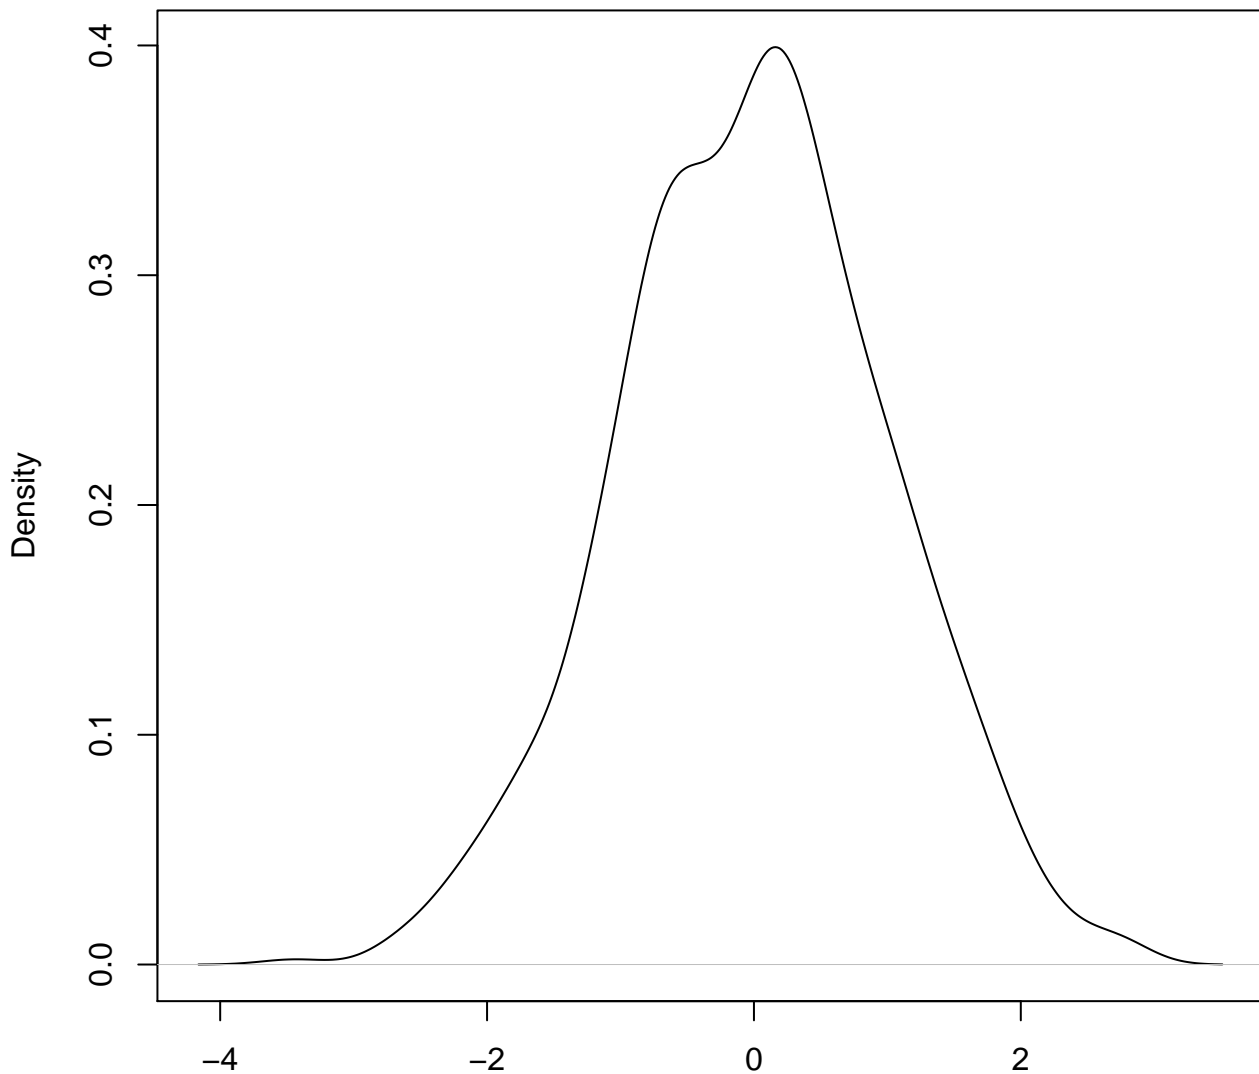

# Transformed Siglec-9 distribution

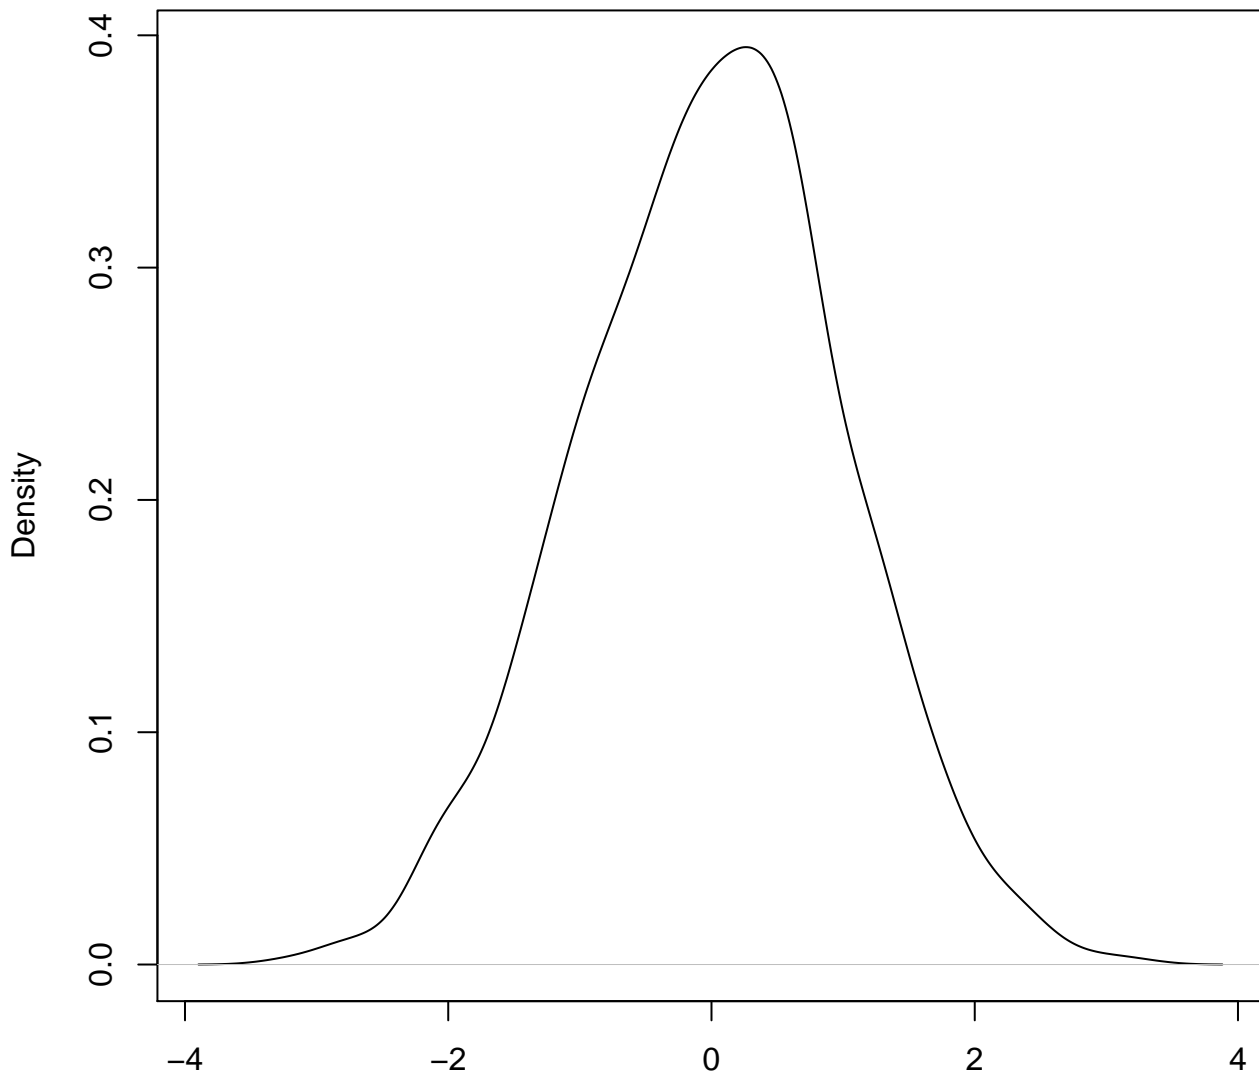



# Transformed CLM-6 distribution

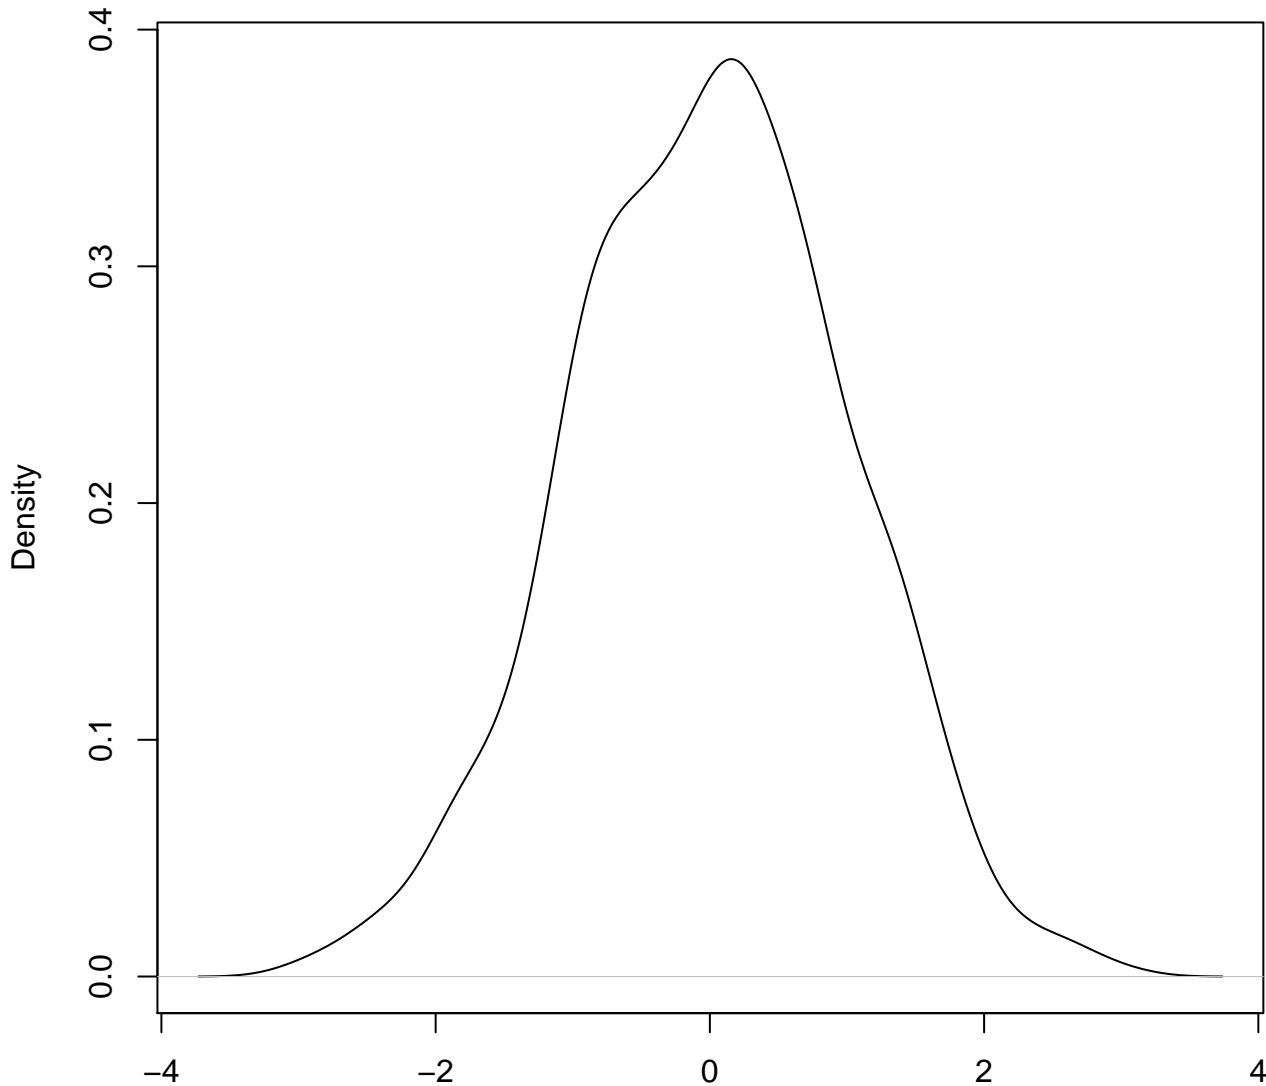

# Transformed EZR distribution

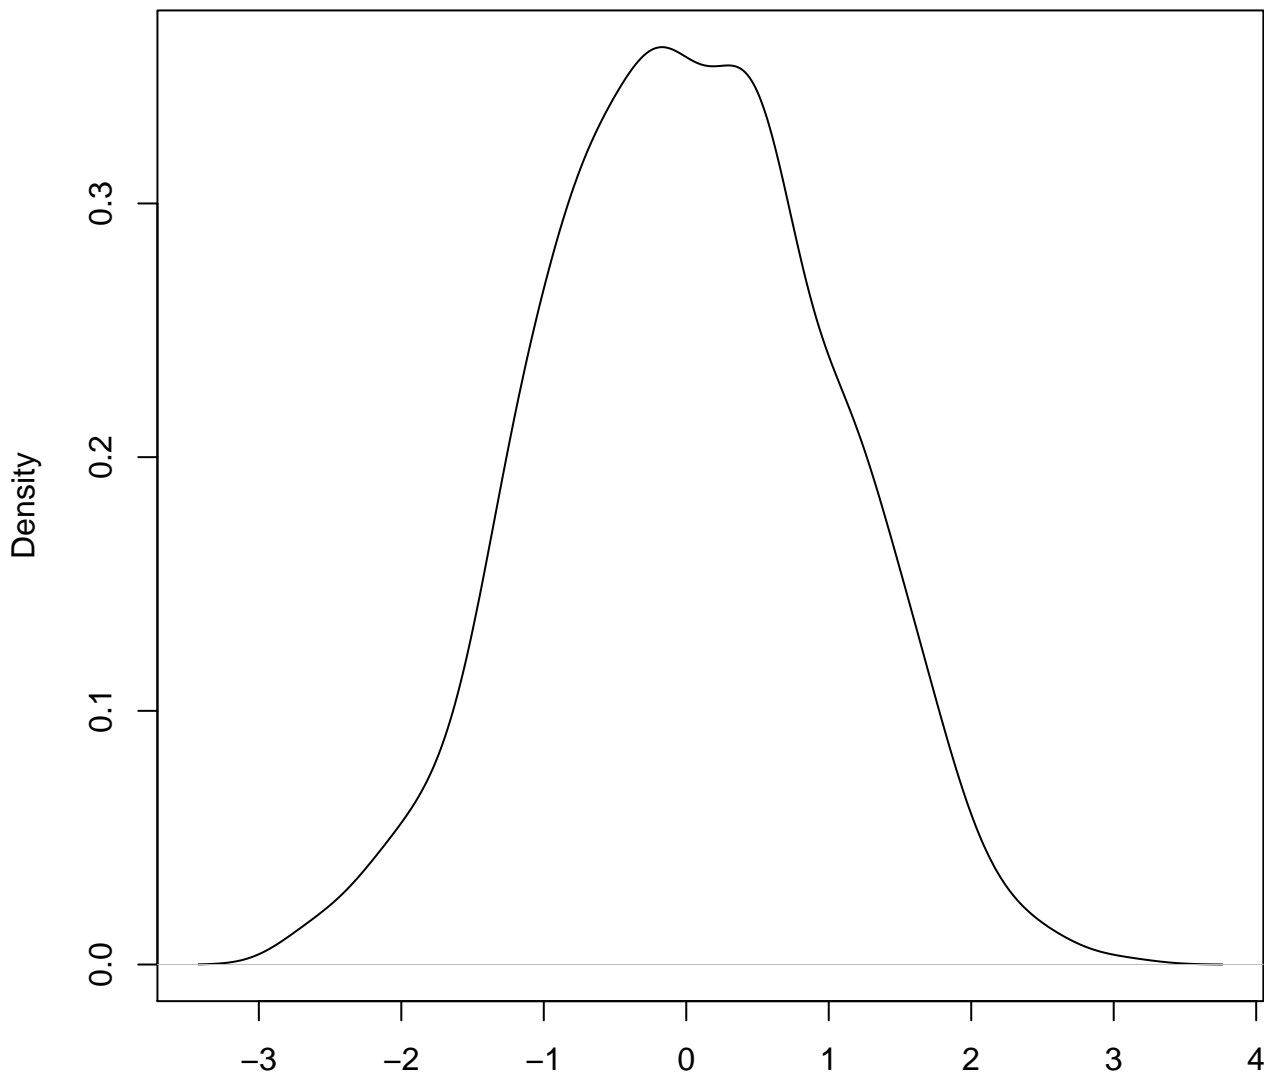

**Transformed SMOC2 distribution**

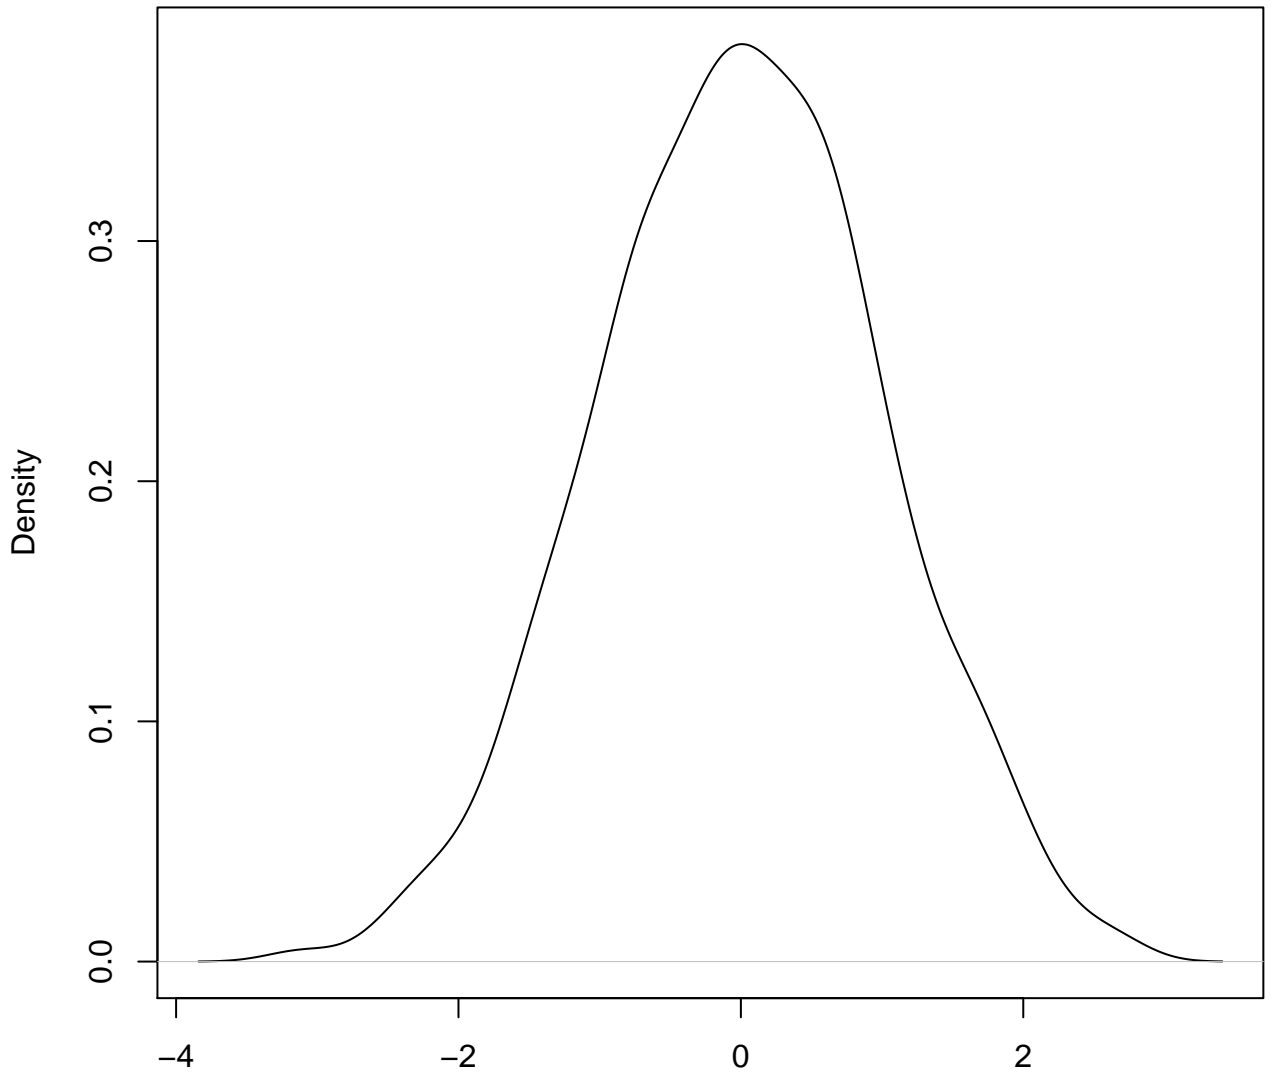

# Transformed NBL1 distribution

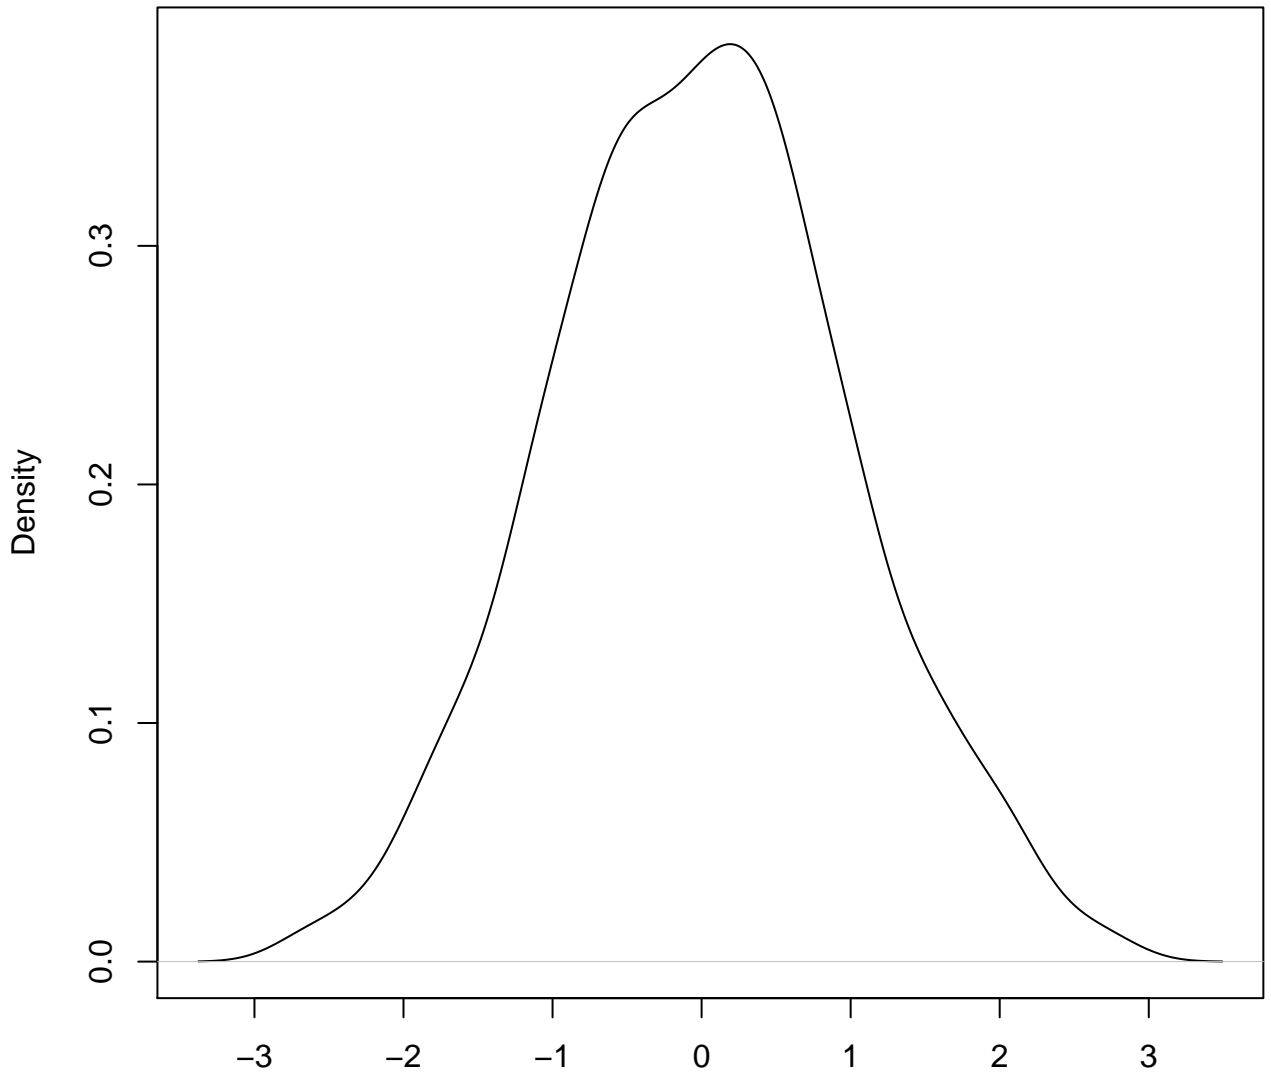

# Transformed EFNA4 distribution

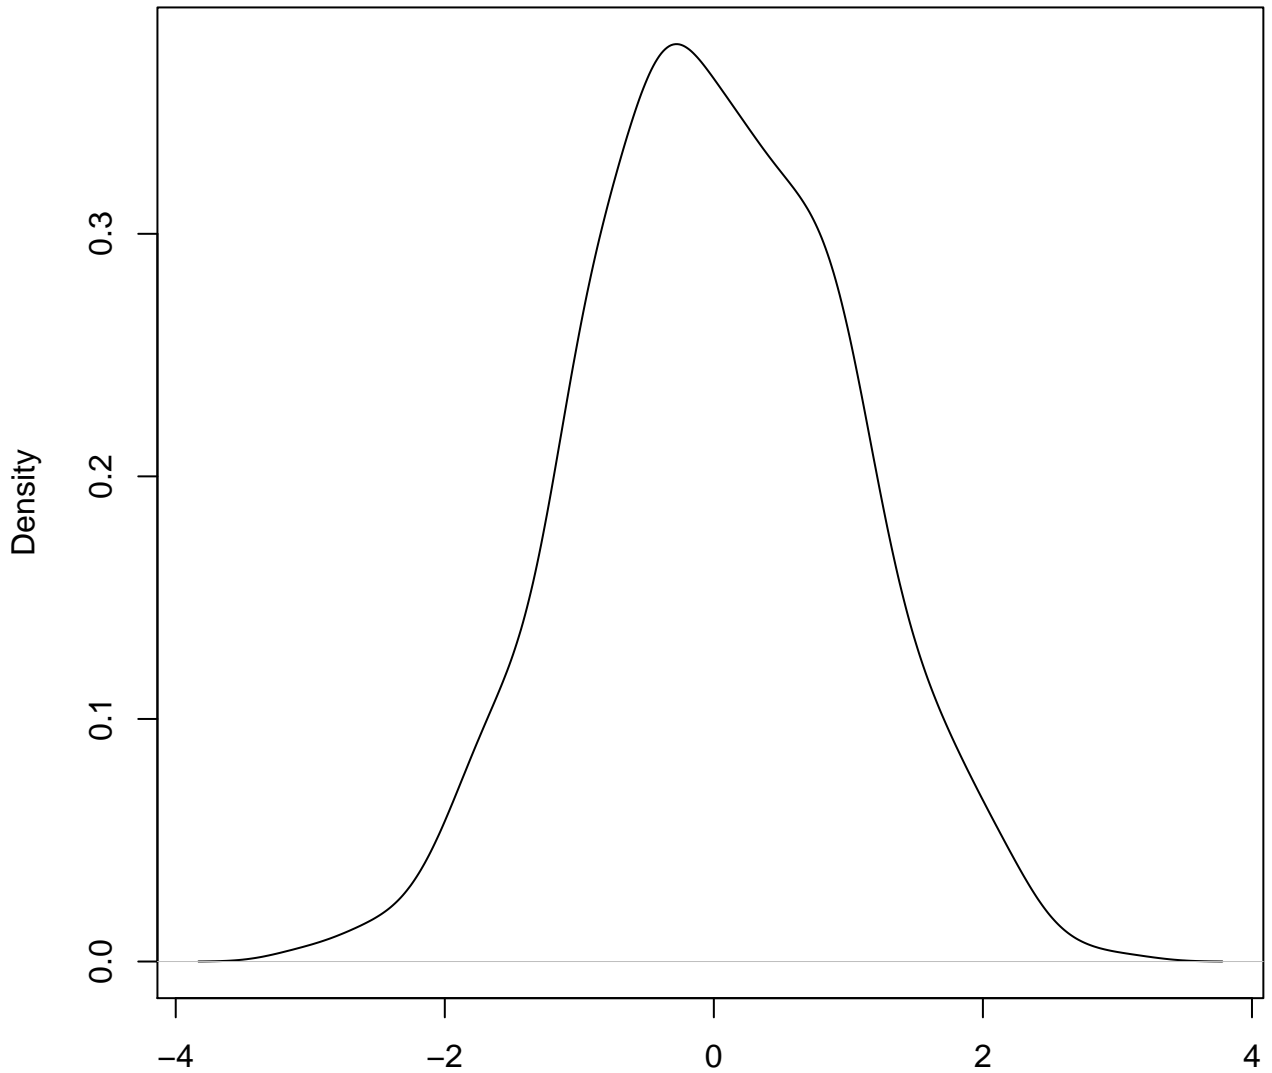

# Transformed SCARB2 distribution

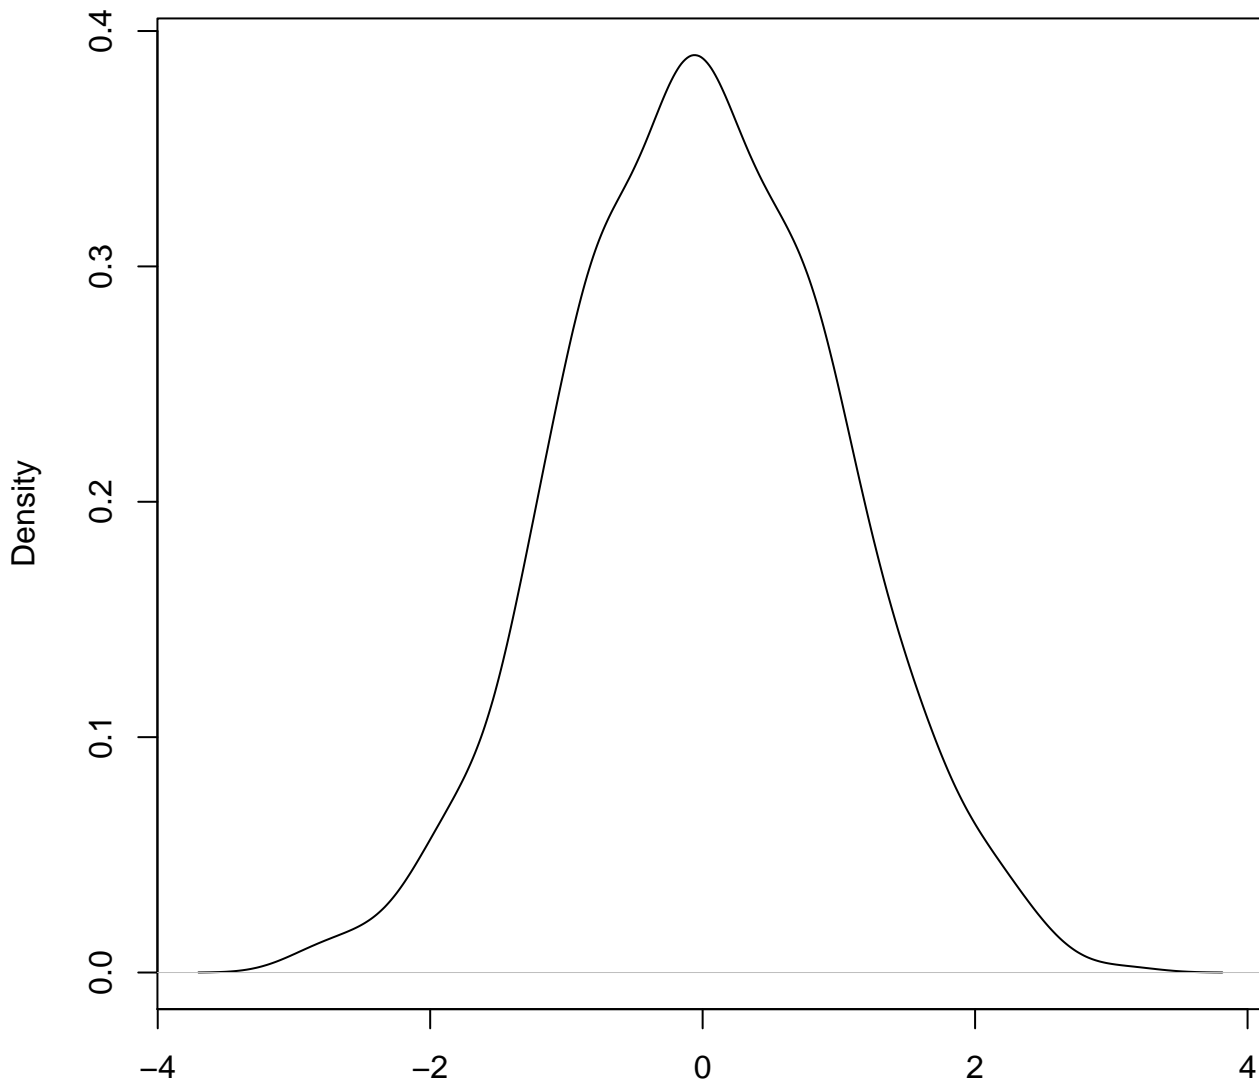

# Transformed NCAN distribution

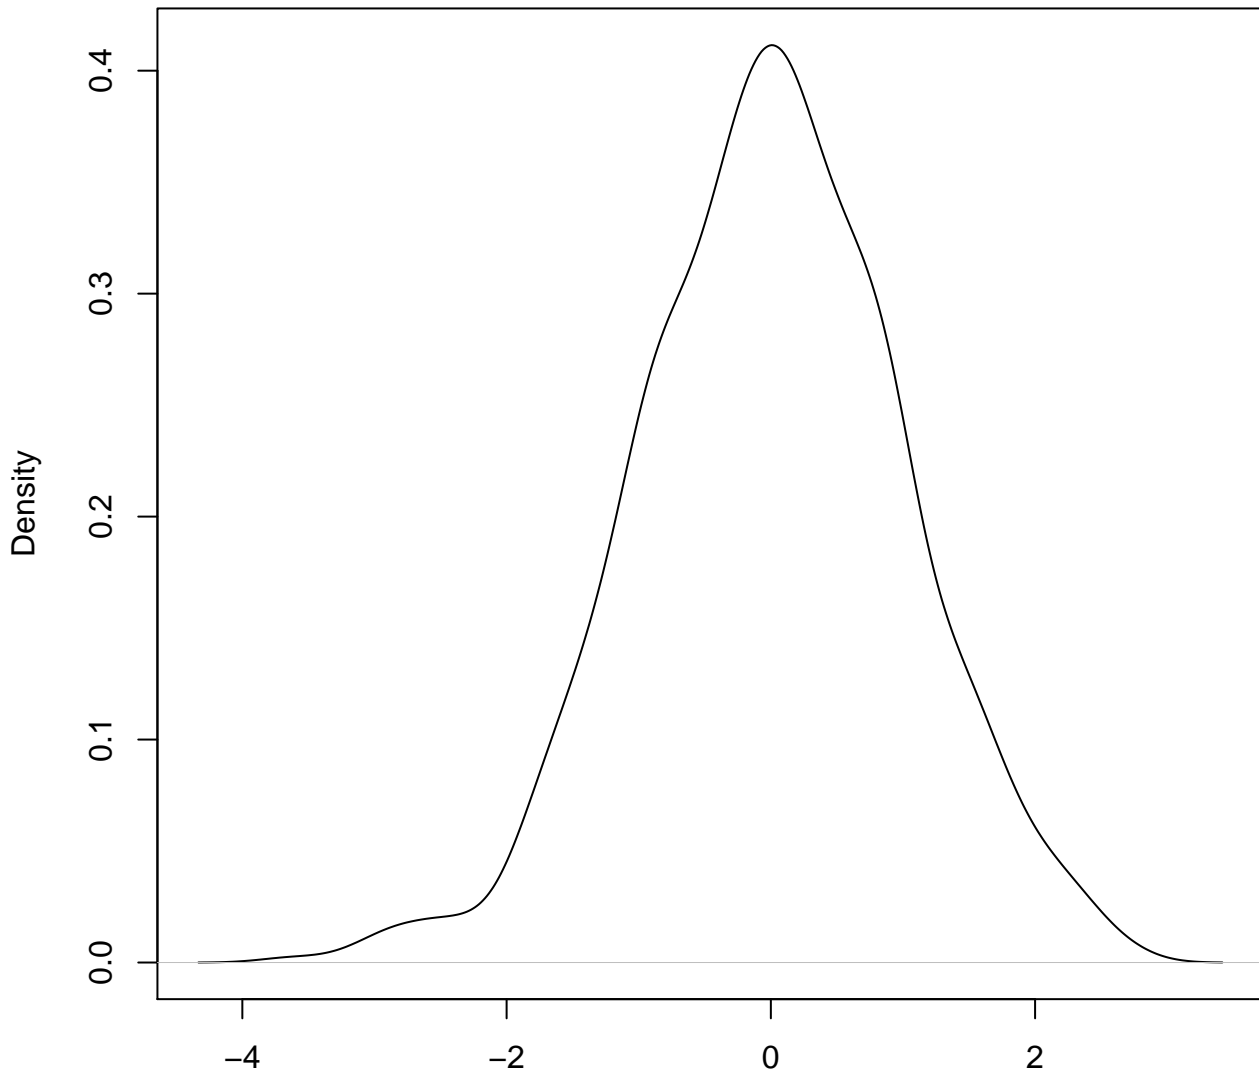

# Transformed PRTG distribution

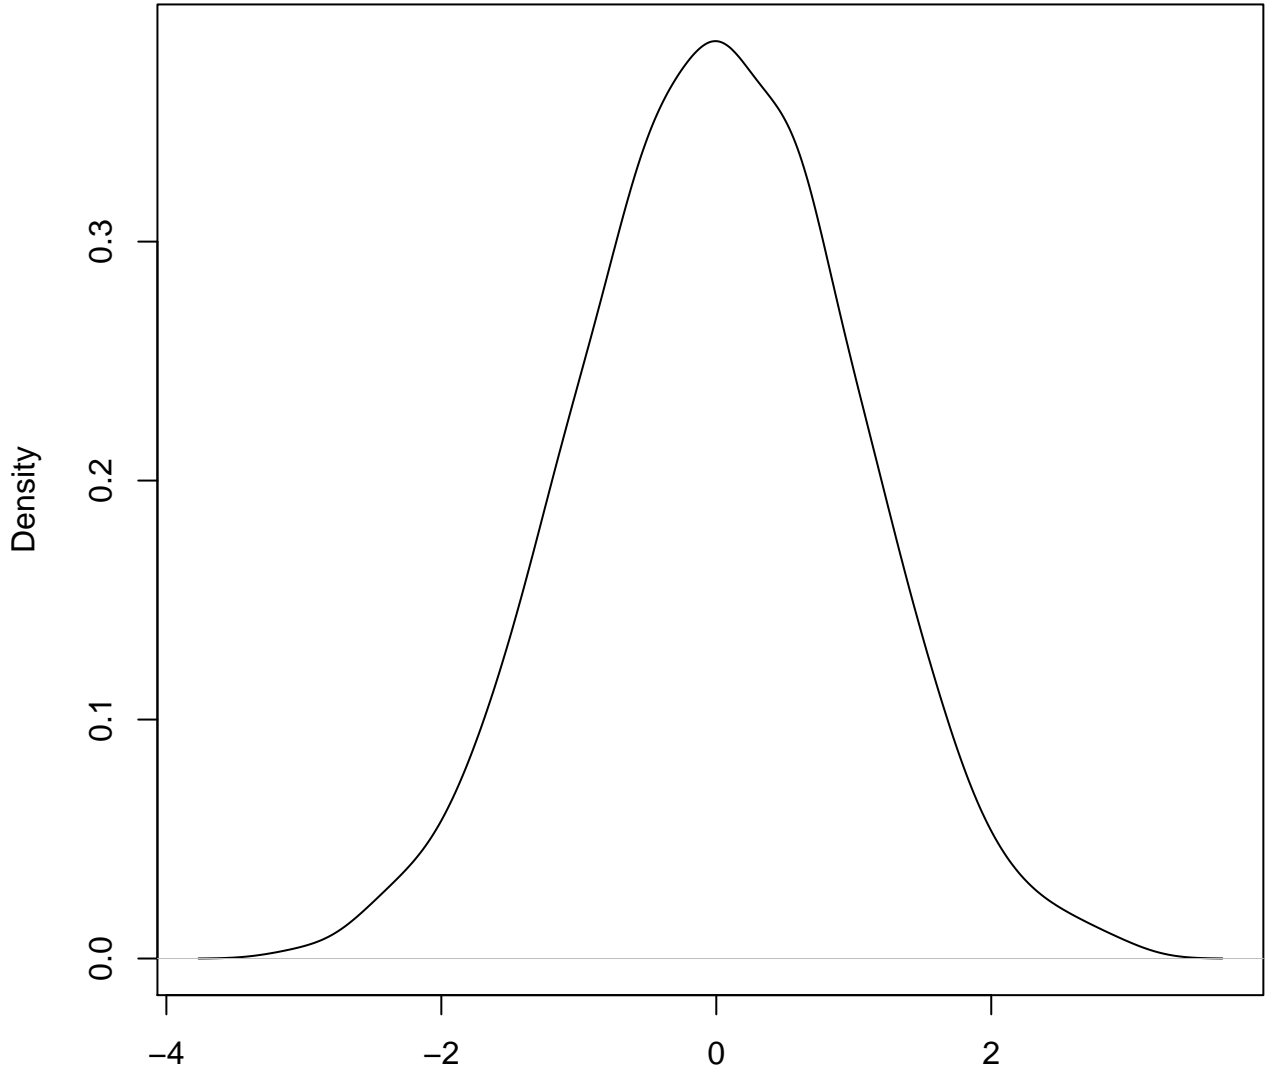



**Transformed ROBO2 distribution**

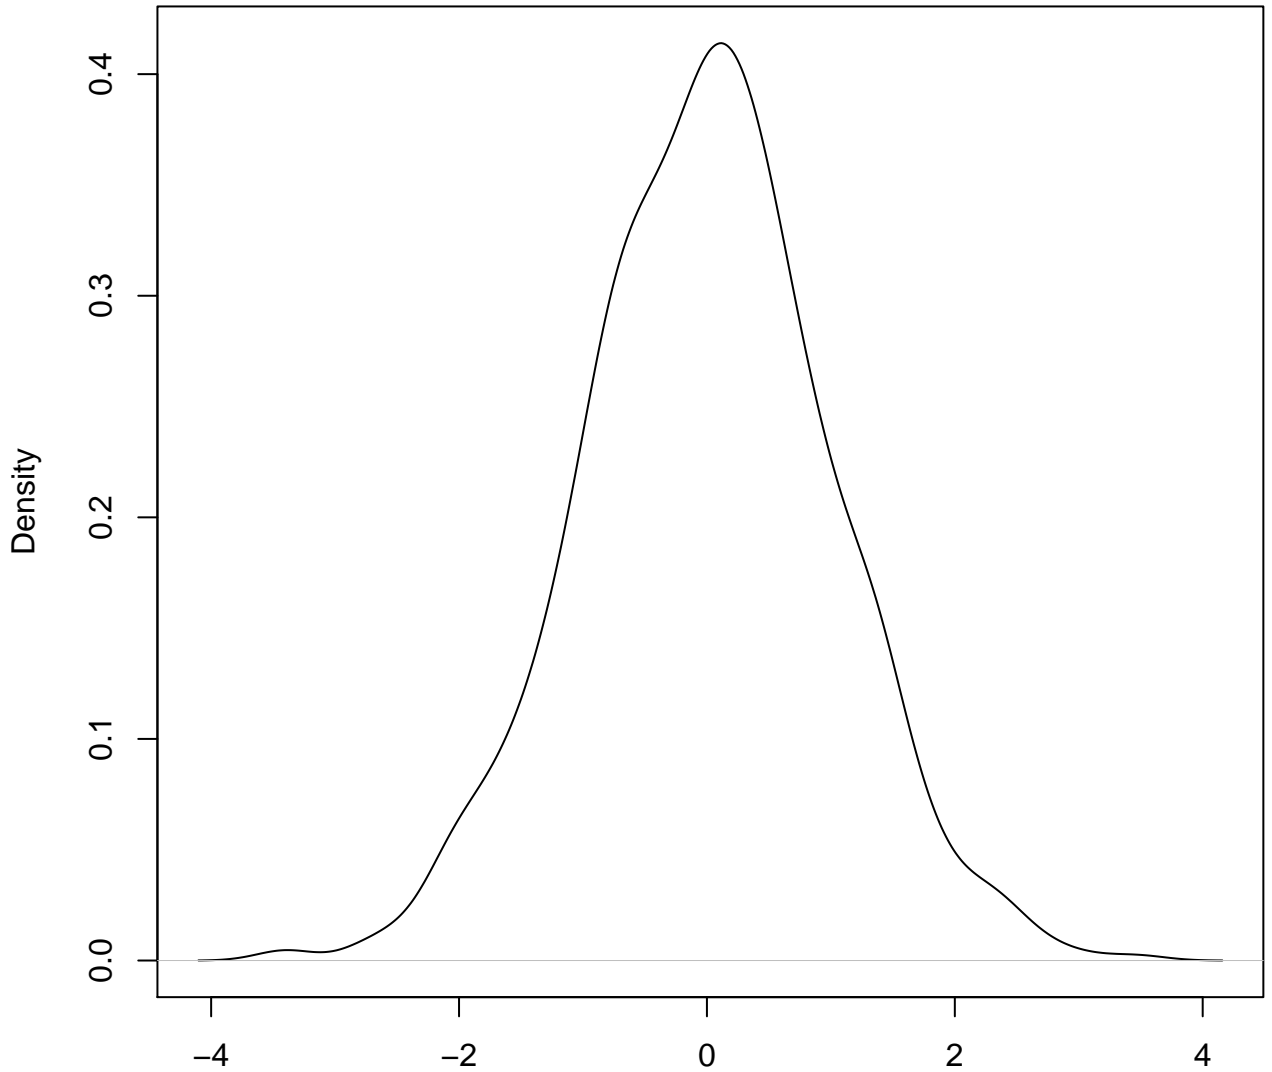

# Transformed CRTAM distribution

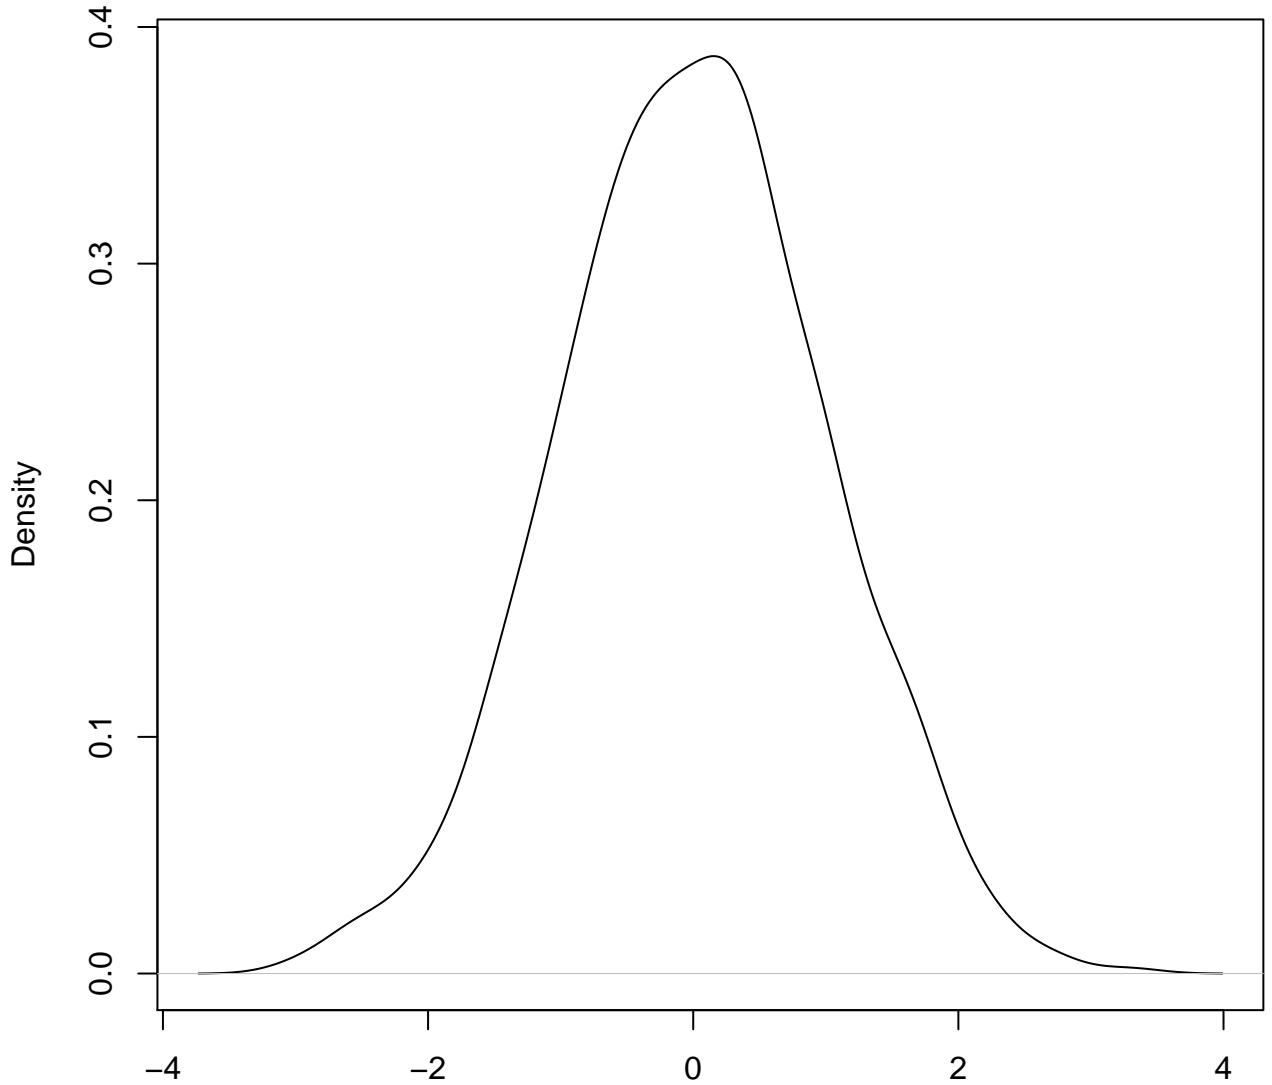

# Transformed RGMA distribution

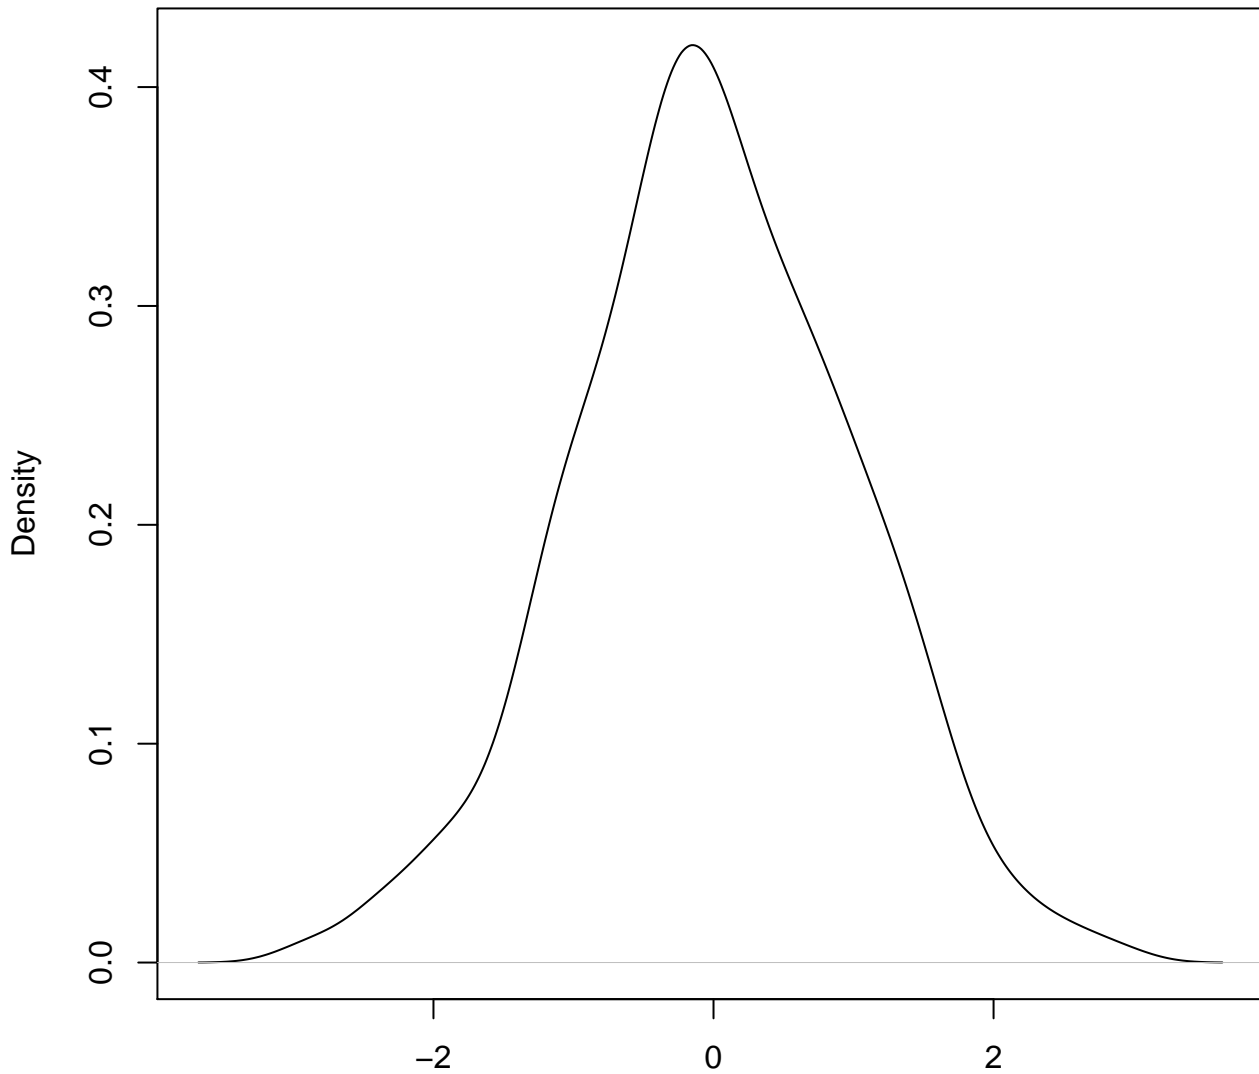

# Transformed PLXNB3 distribution

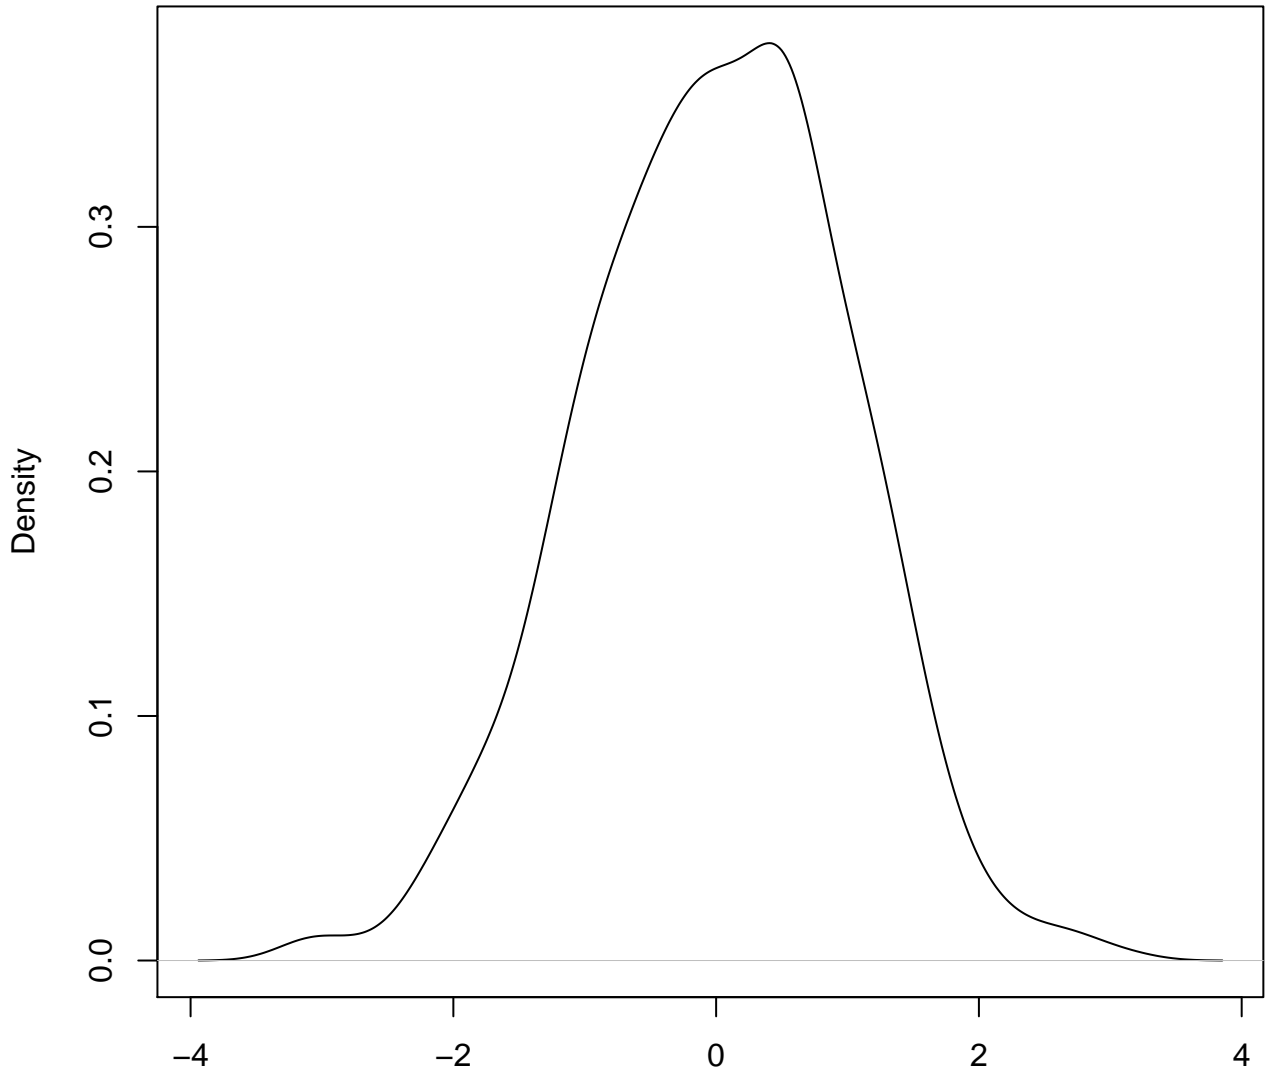

# Transformed CPA2 distribution

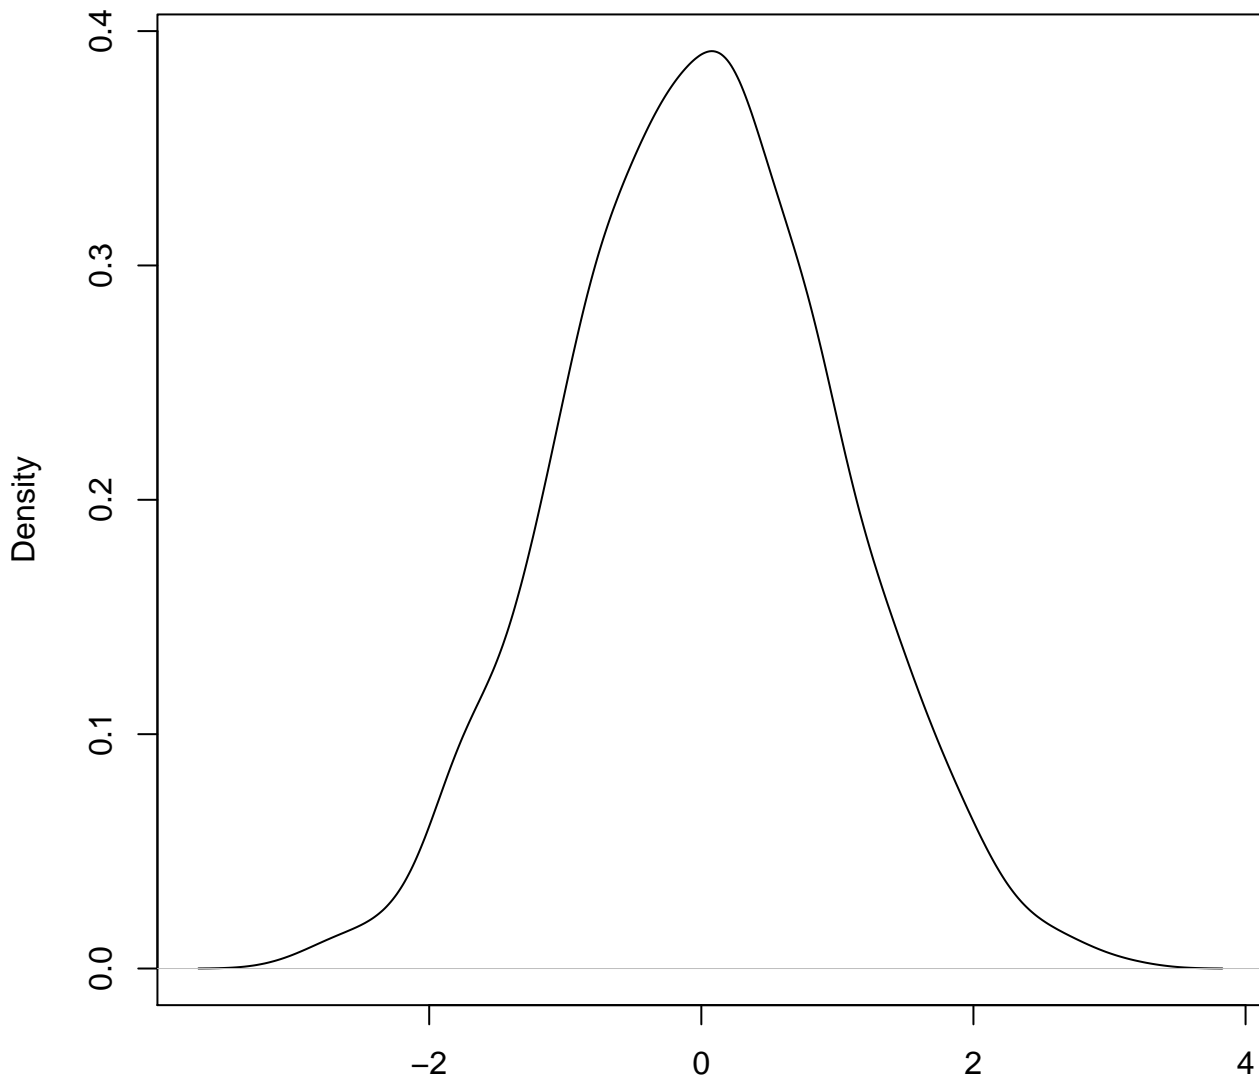

# Transformed CD38 distribution

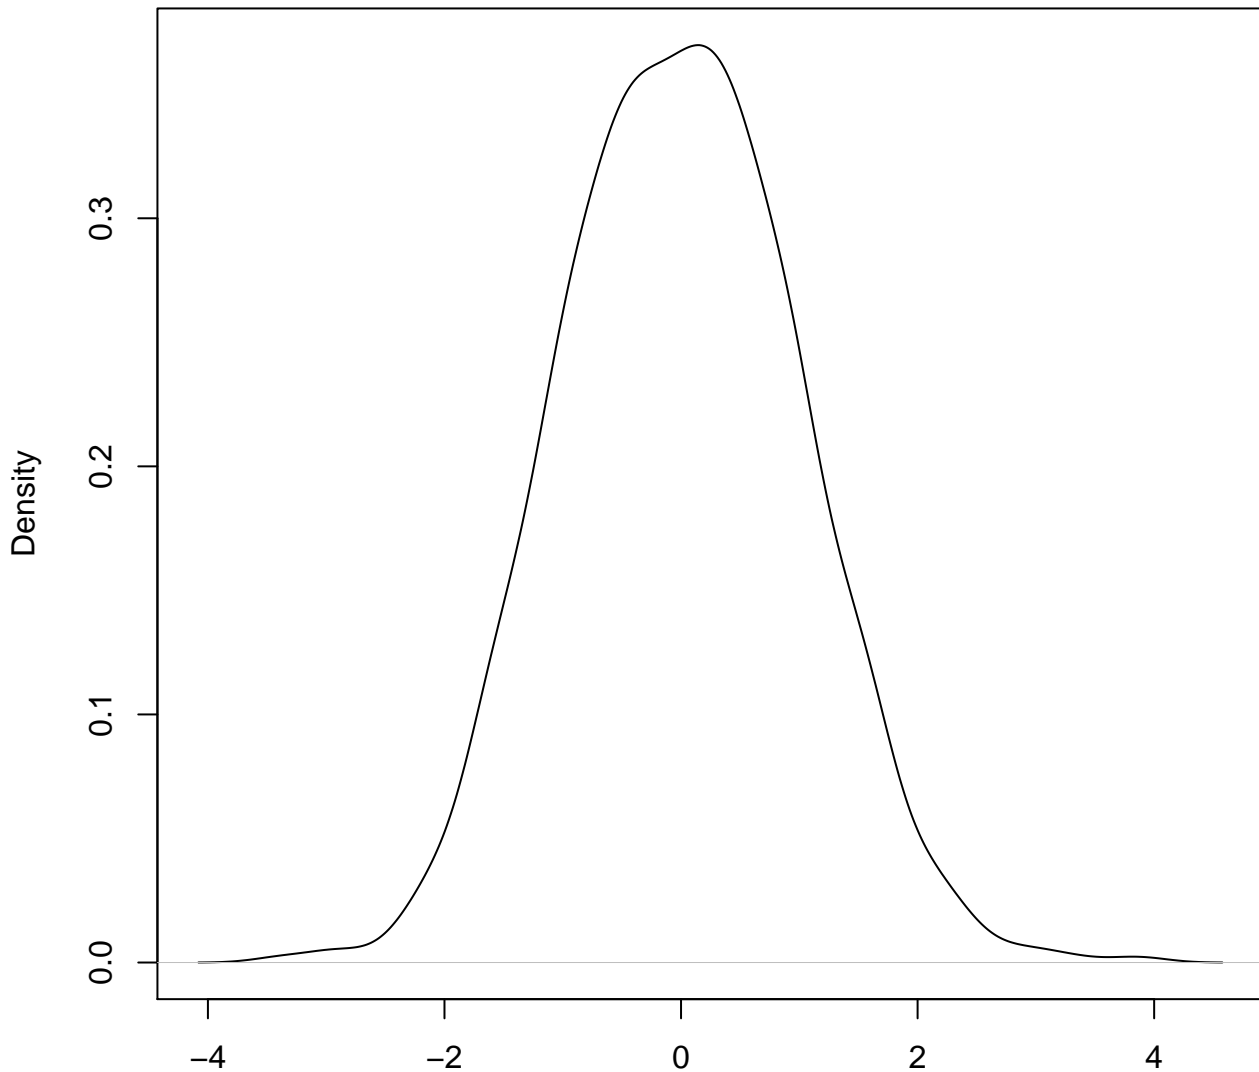

# Transformed SMPD1 distribution

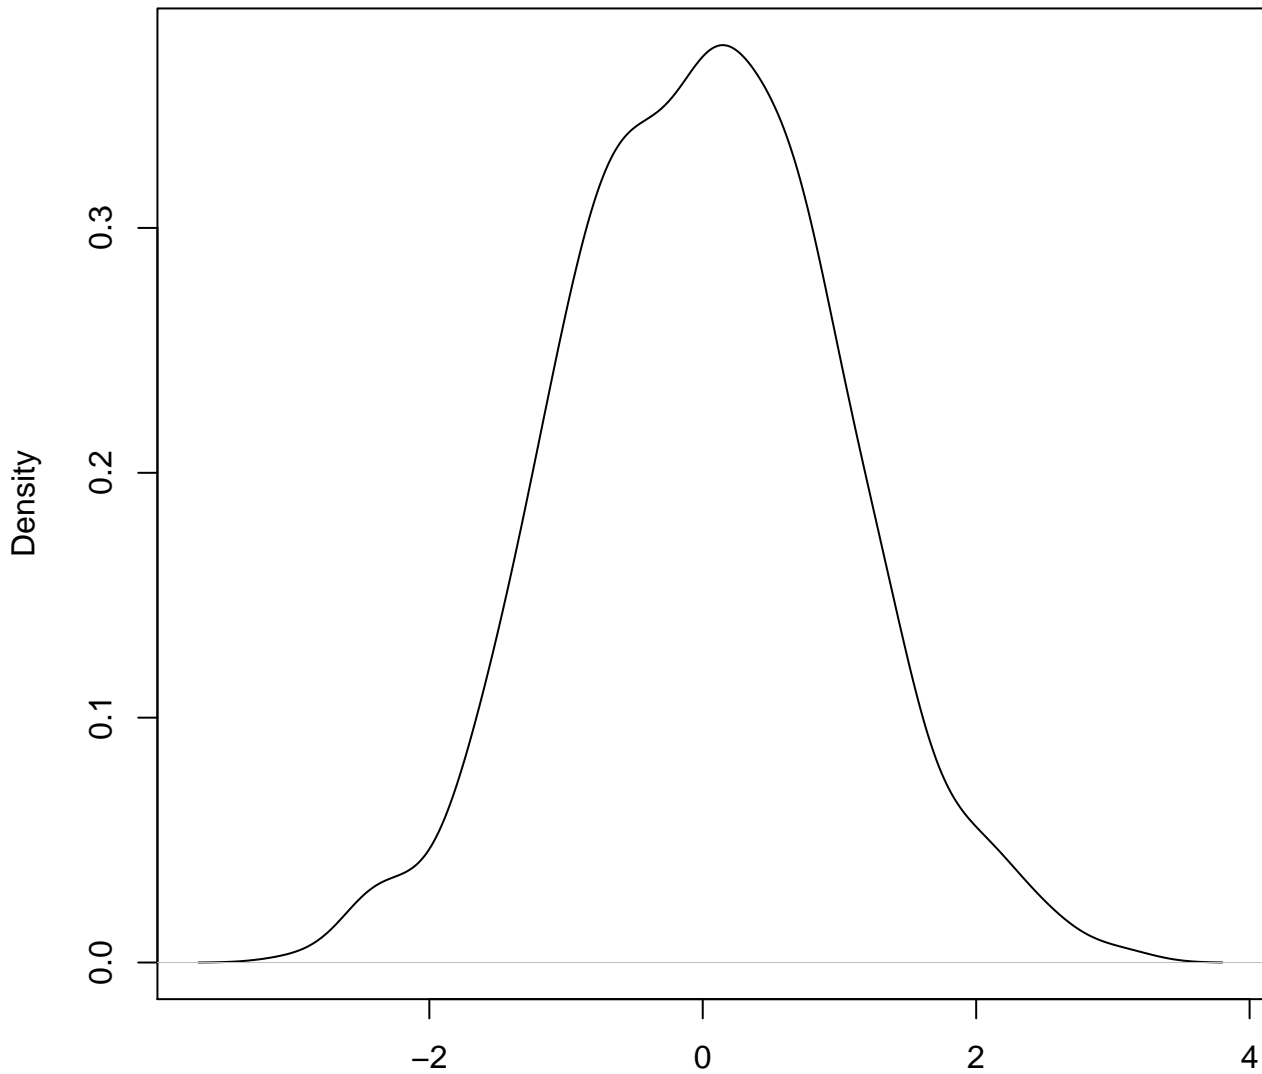

# Transformed MSR1 distribution

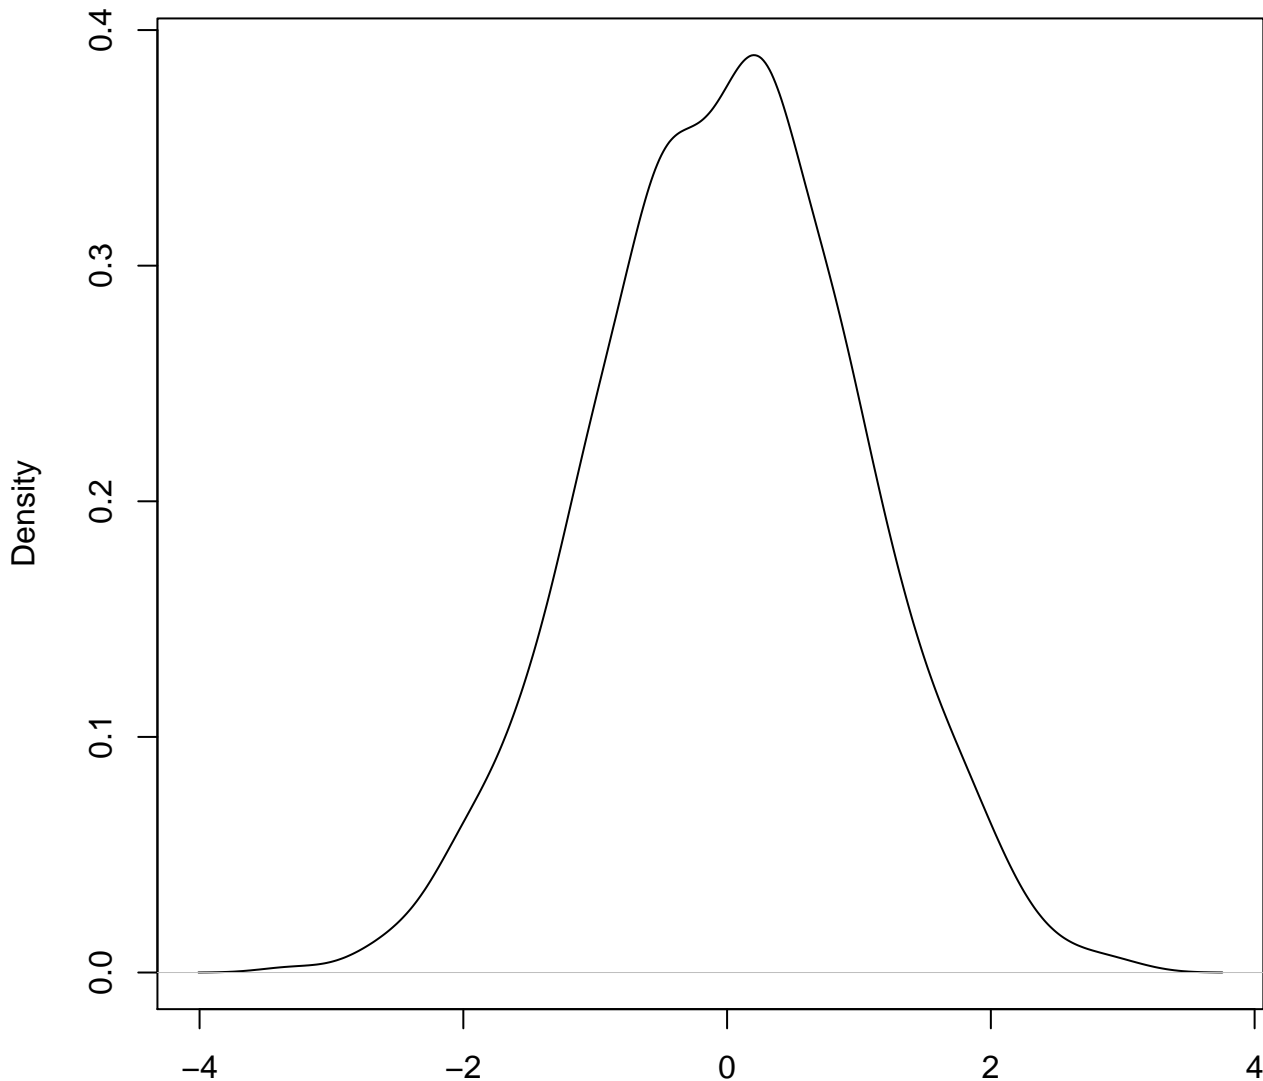



# Transformed Alpha-2-MRAP distribution

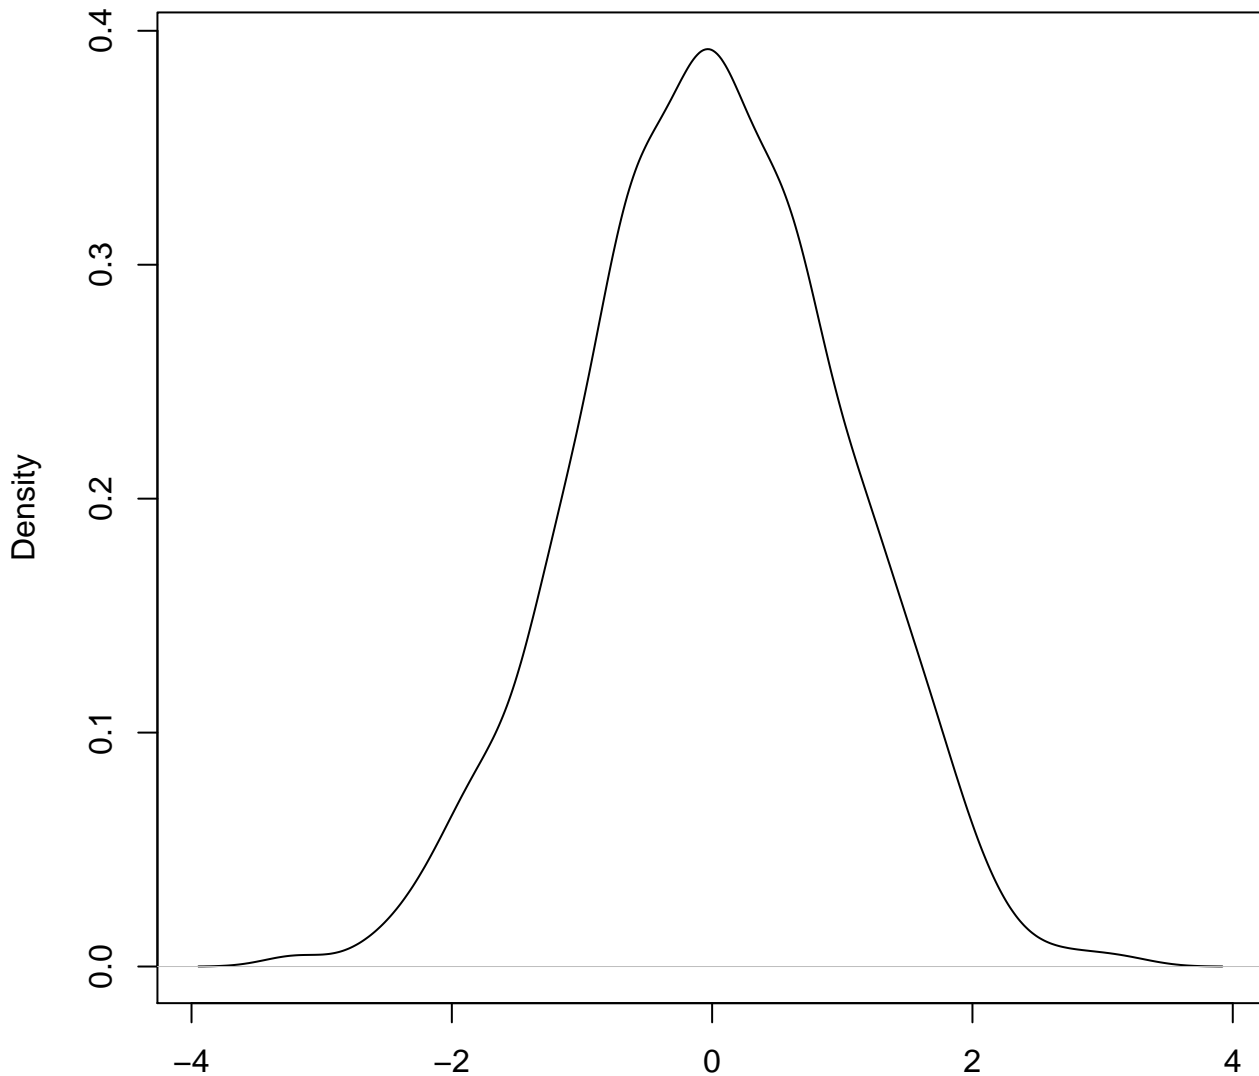

# Transformed sFRP-3 distribution

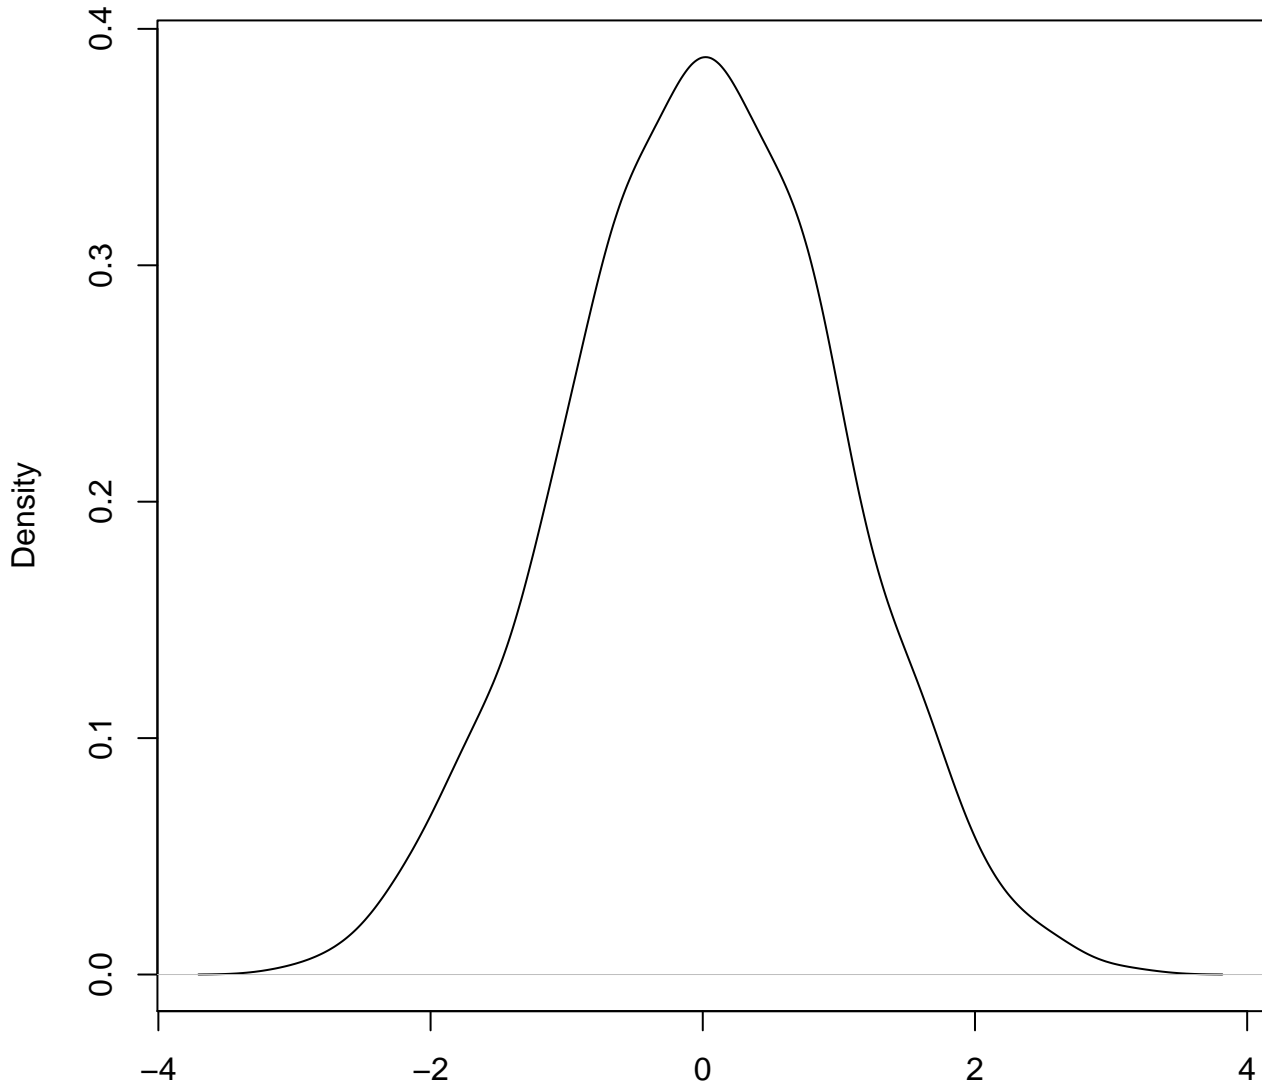

# Transformed EPHB6 distribution

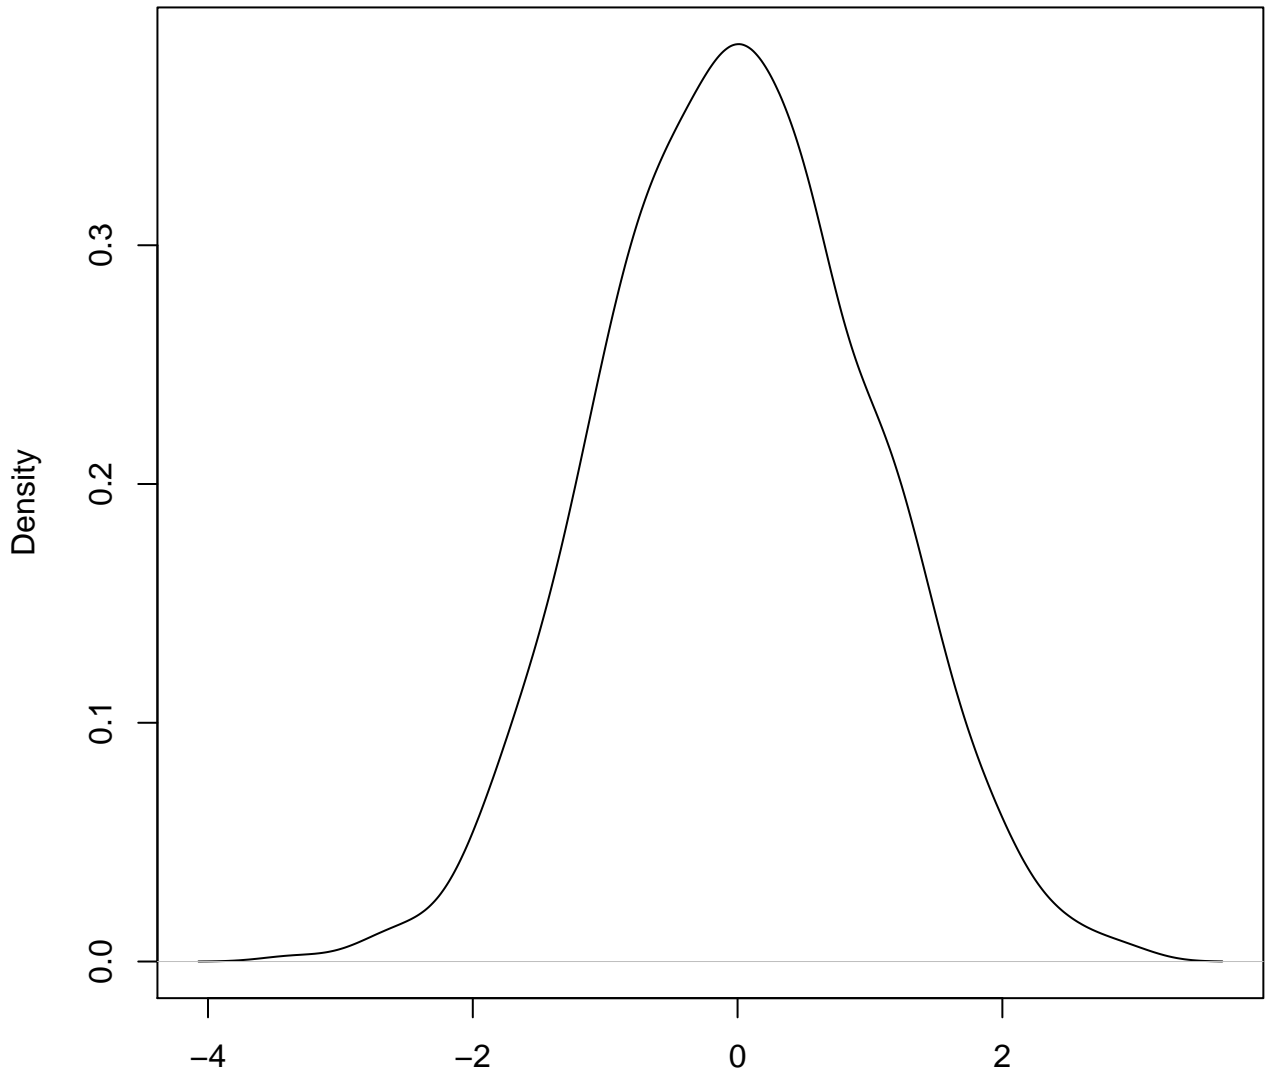

# Transformed RGMB distribution

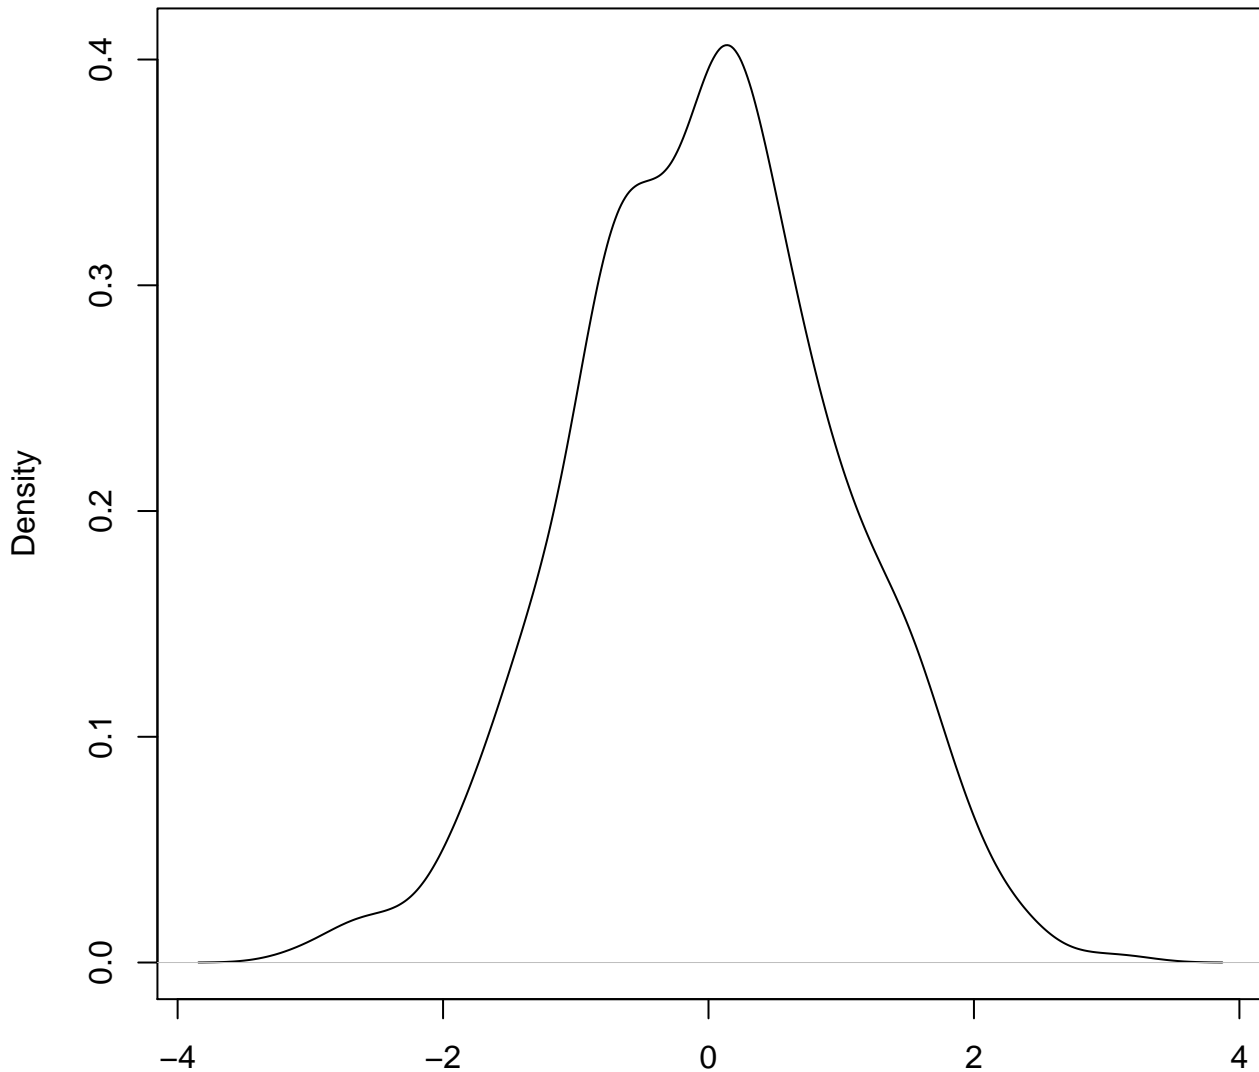

# Transformed SIGLEC1 distribution

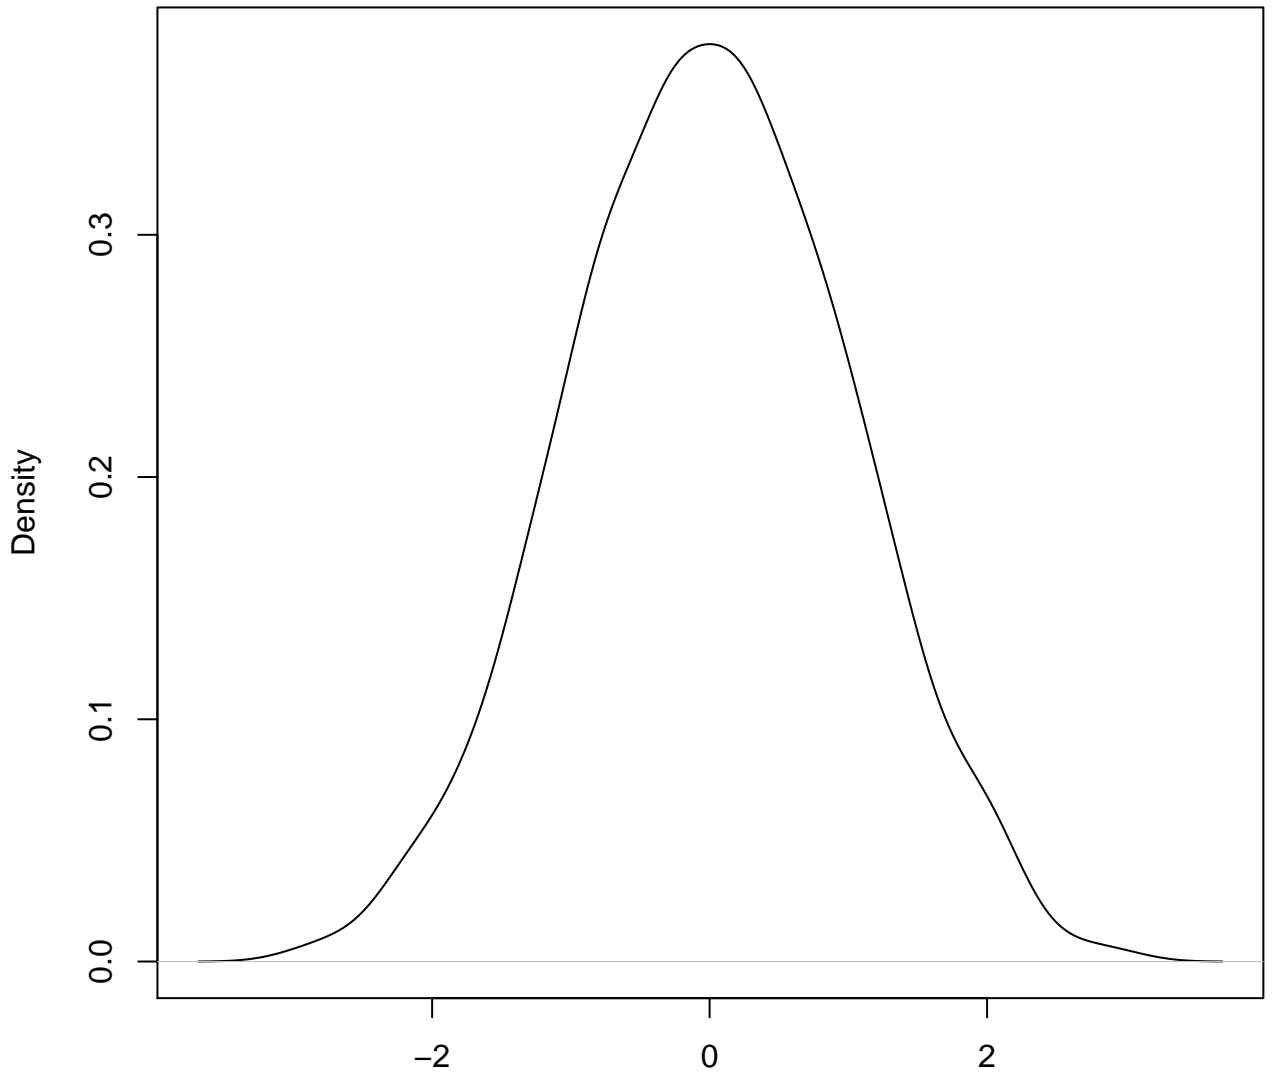

# Transformed CNTN5 distribution

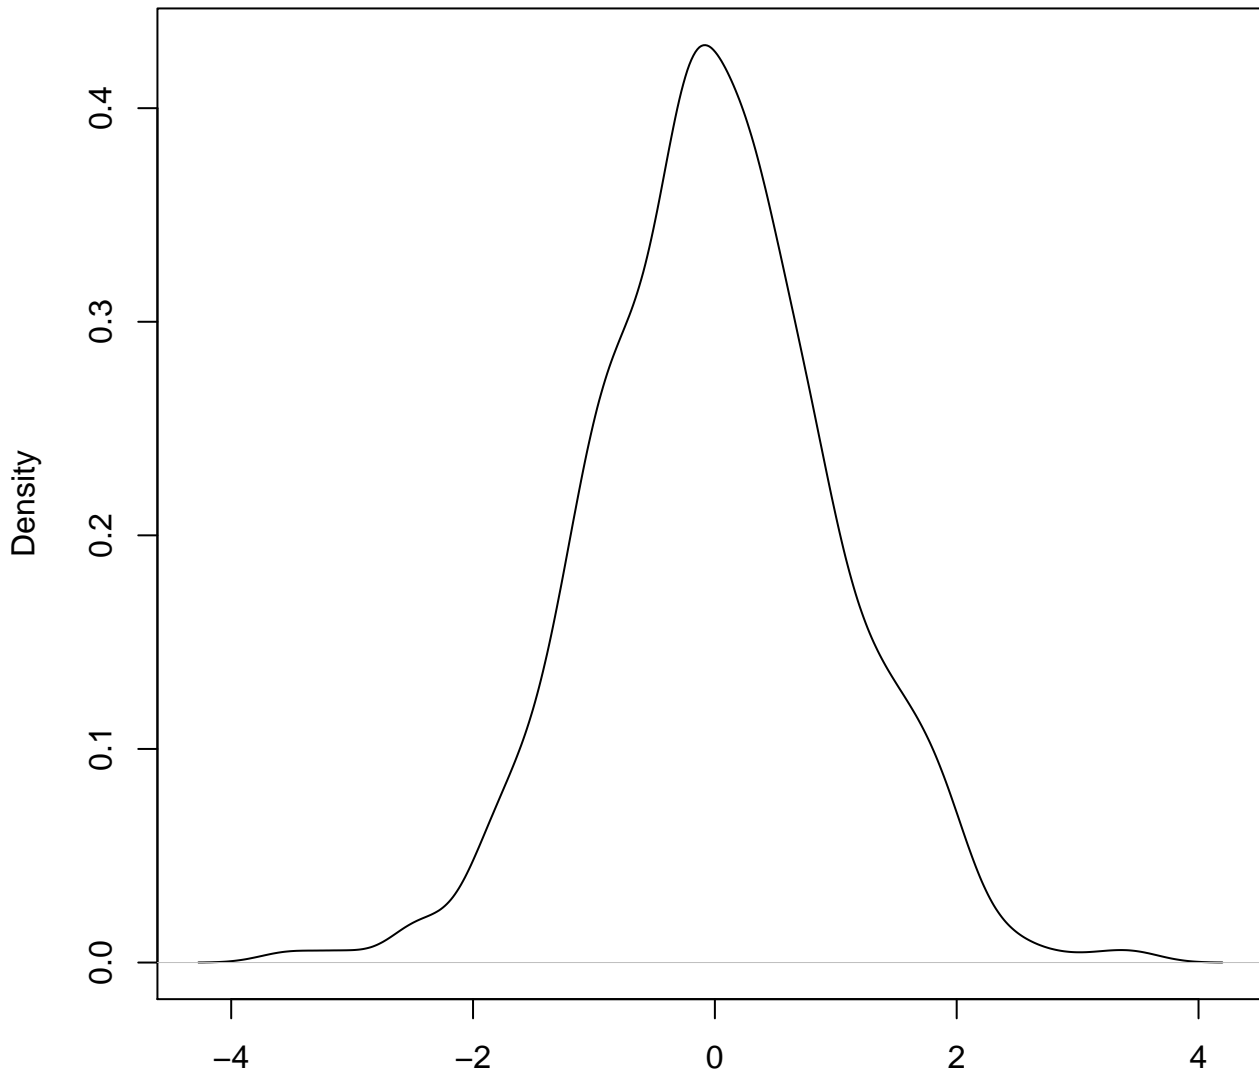

# Transformed ADAM 22 distribution

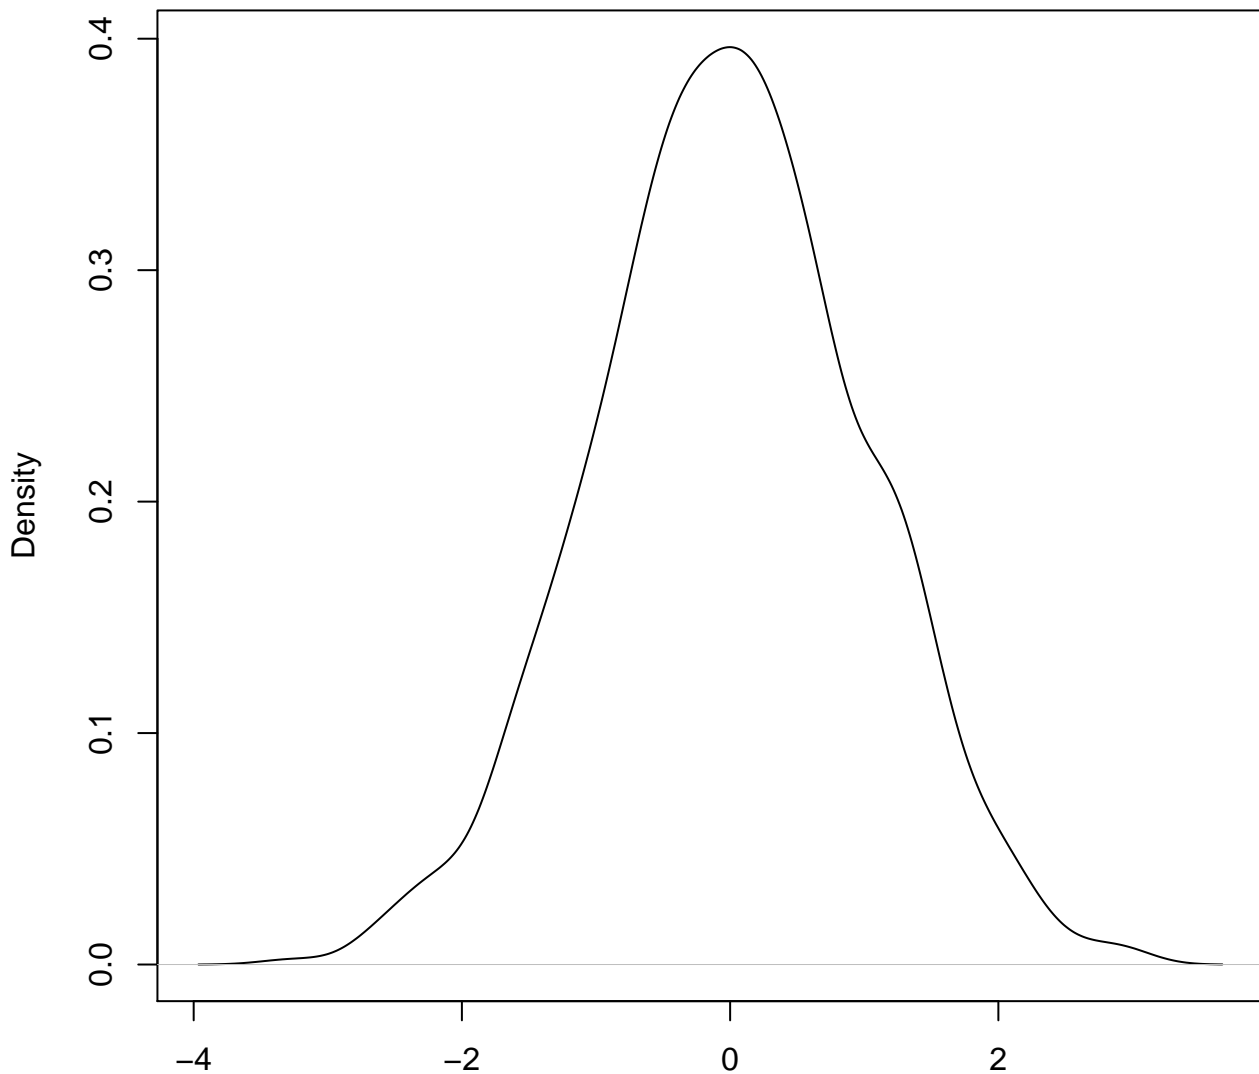

# Transformed CLEC1B distribution

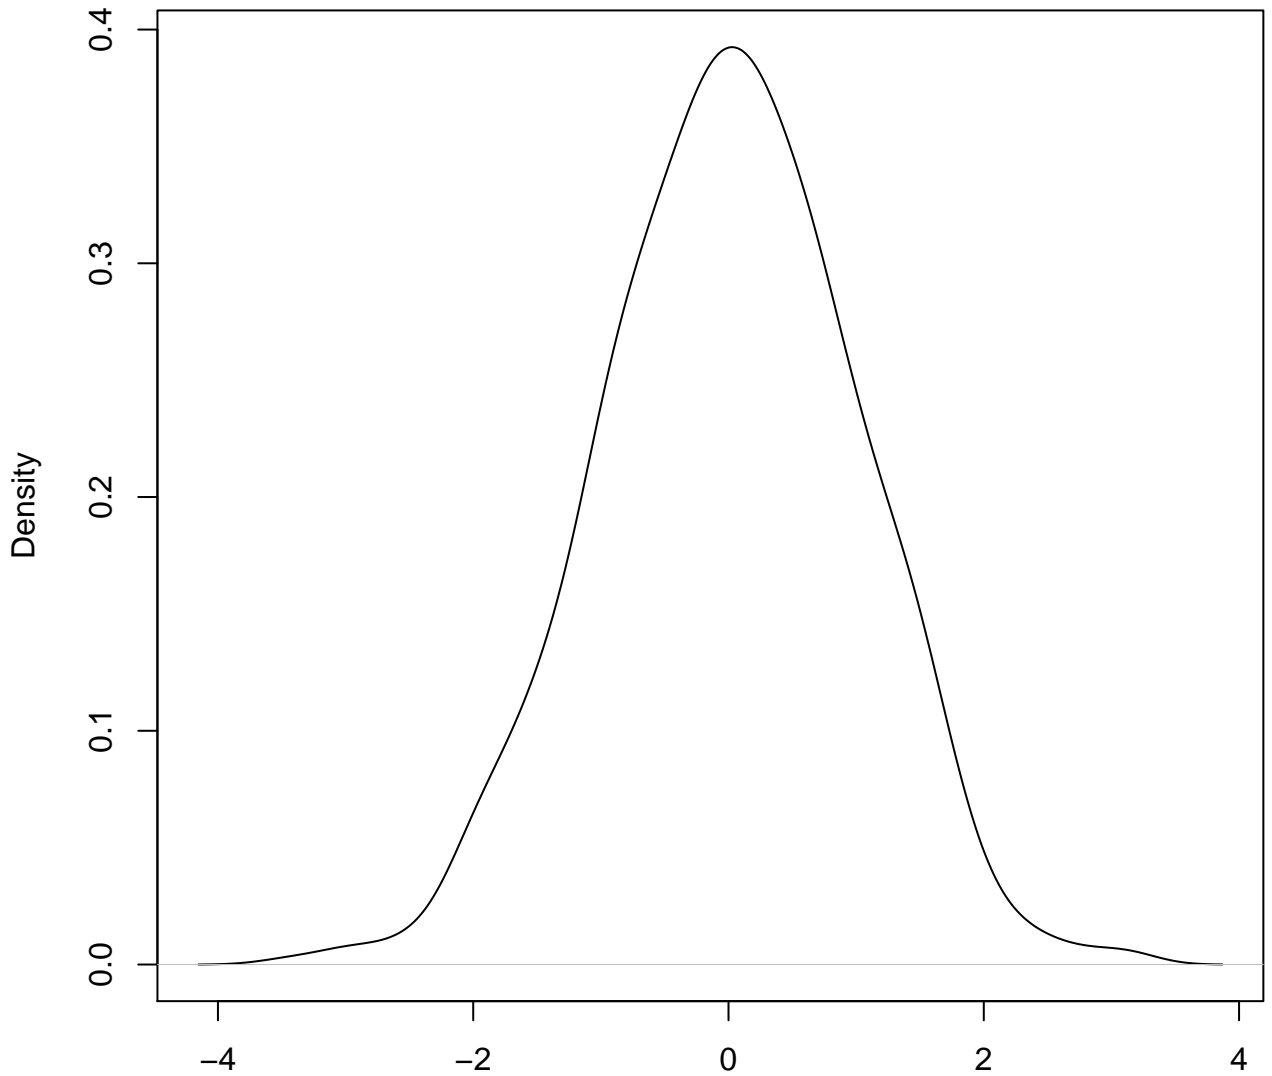



# Transformed ADAM 23 distribution

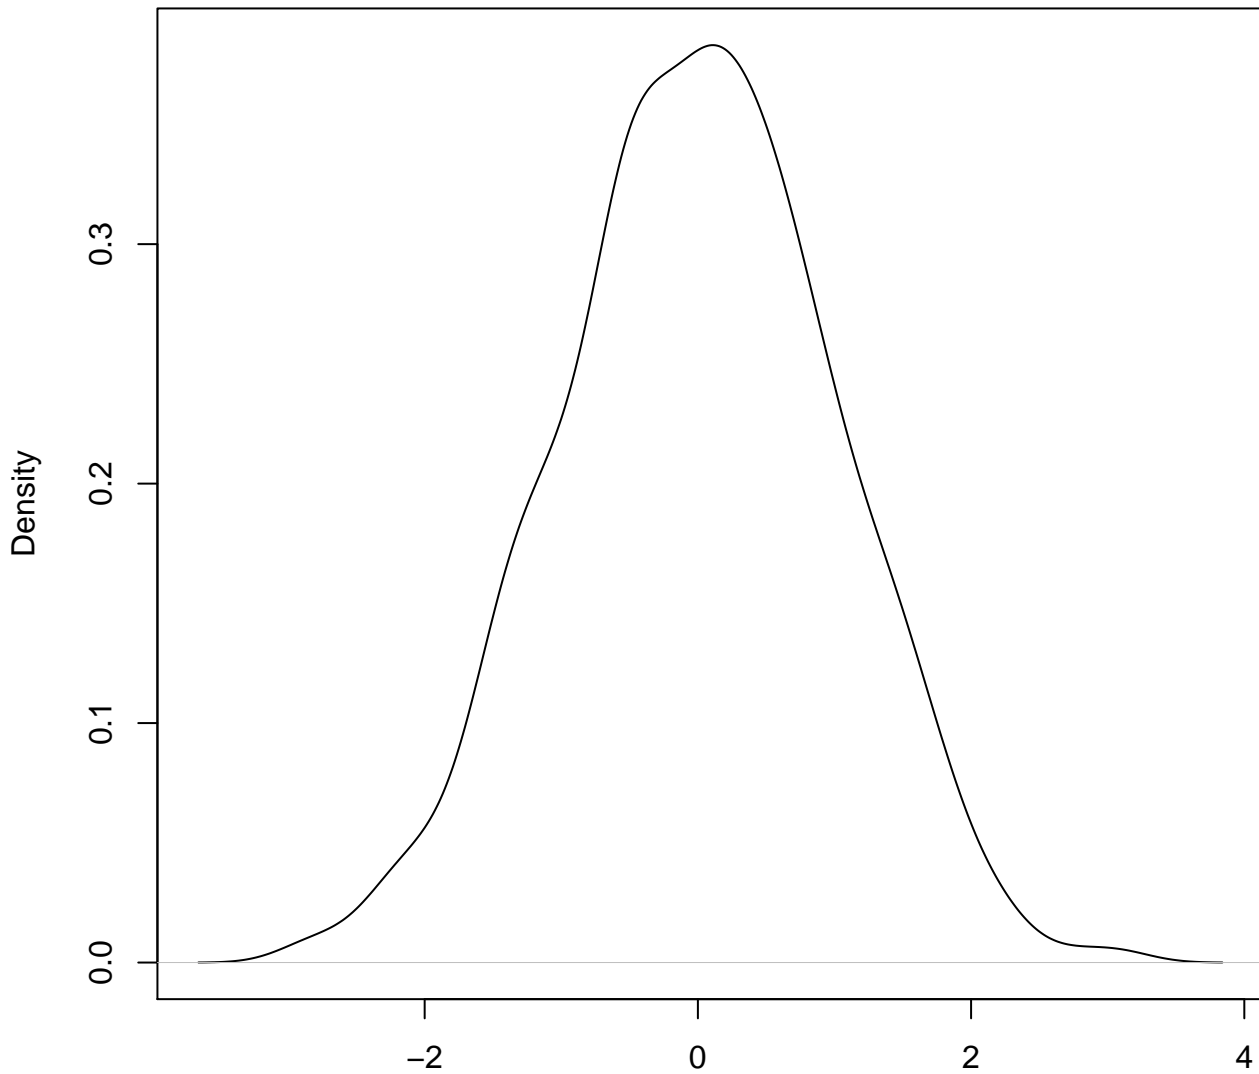

# Transformed MATN3 distribution

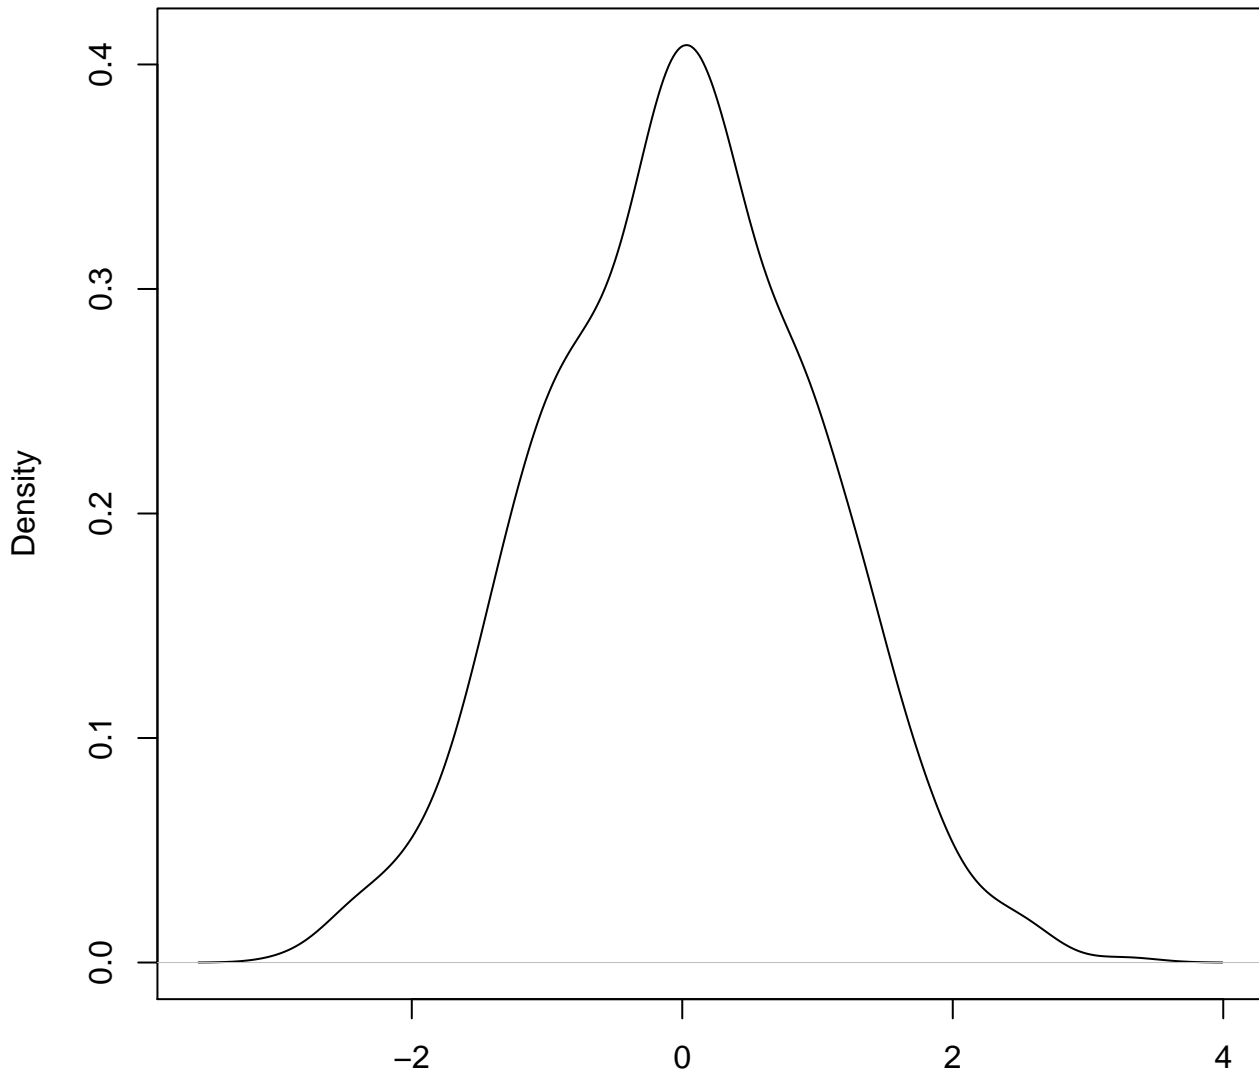

# Transformed RSP01 distribution

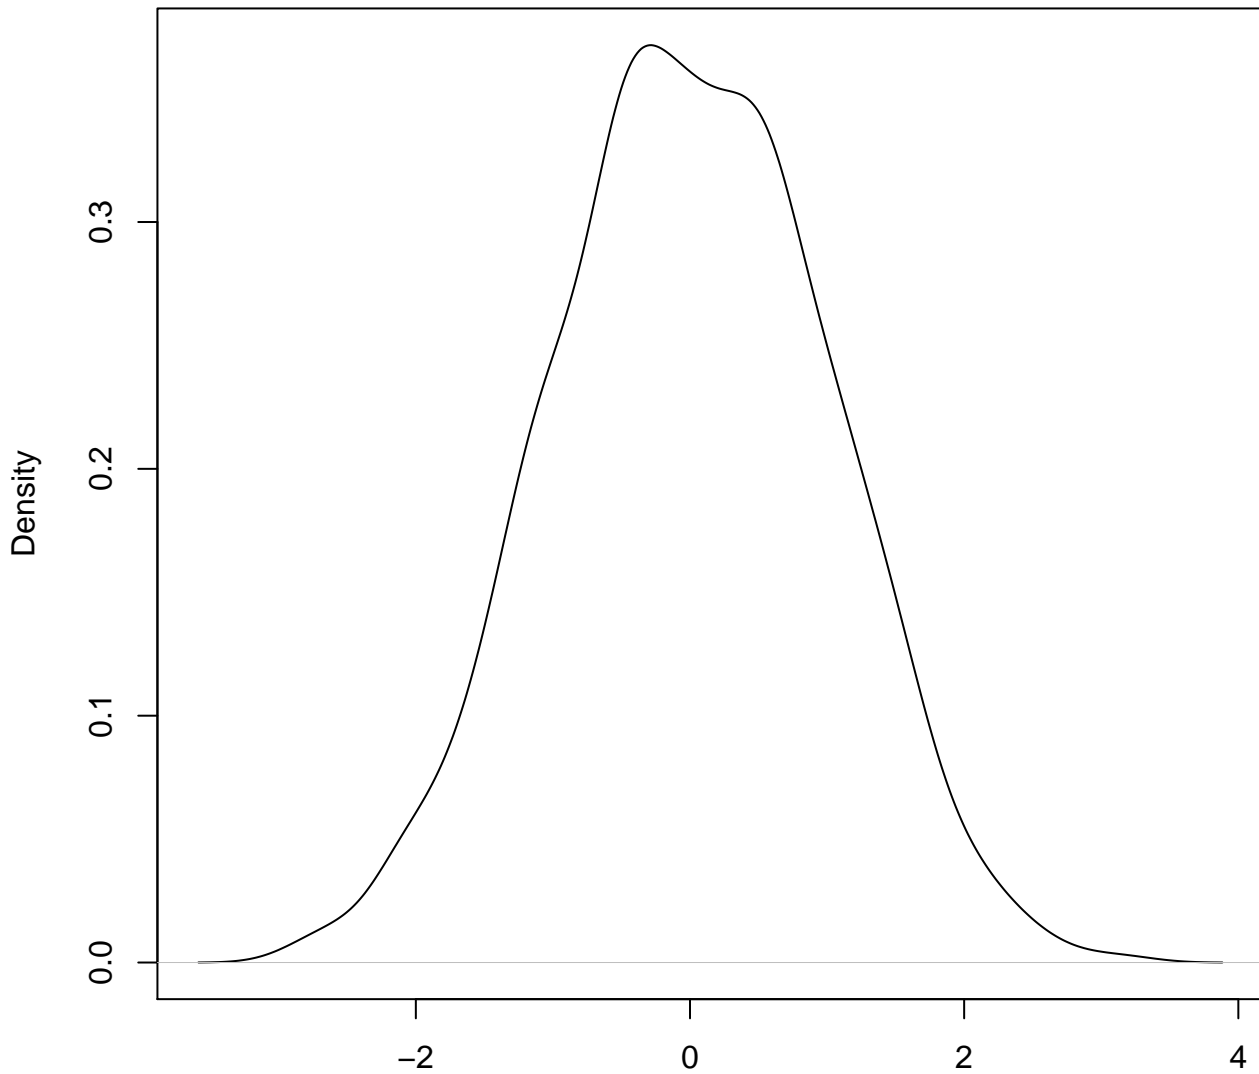

# Transformed HAGH distribution

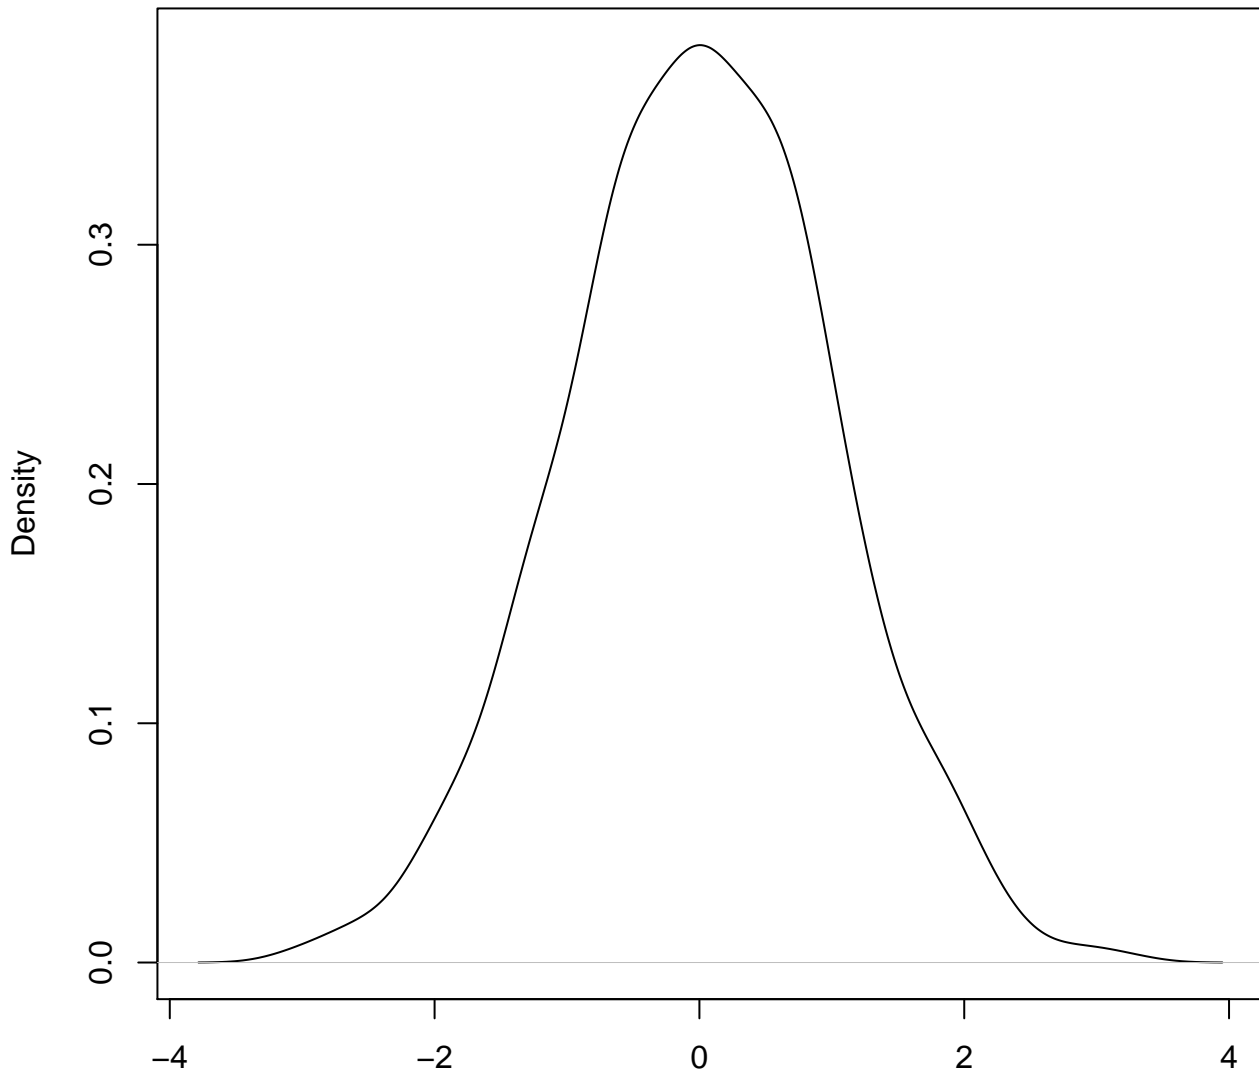

# Transformed LXN distribution

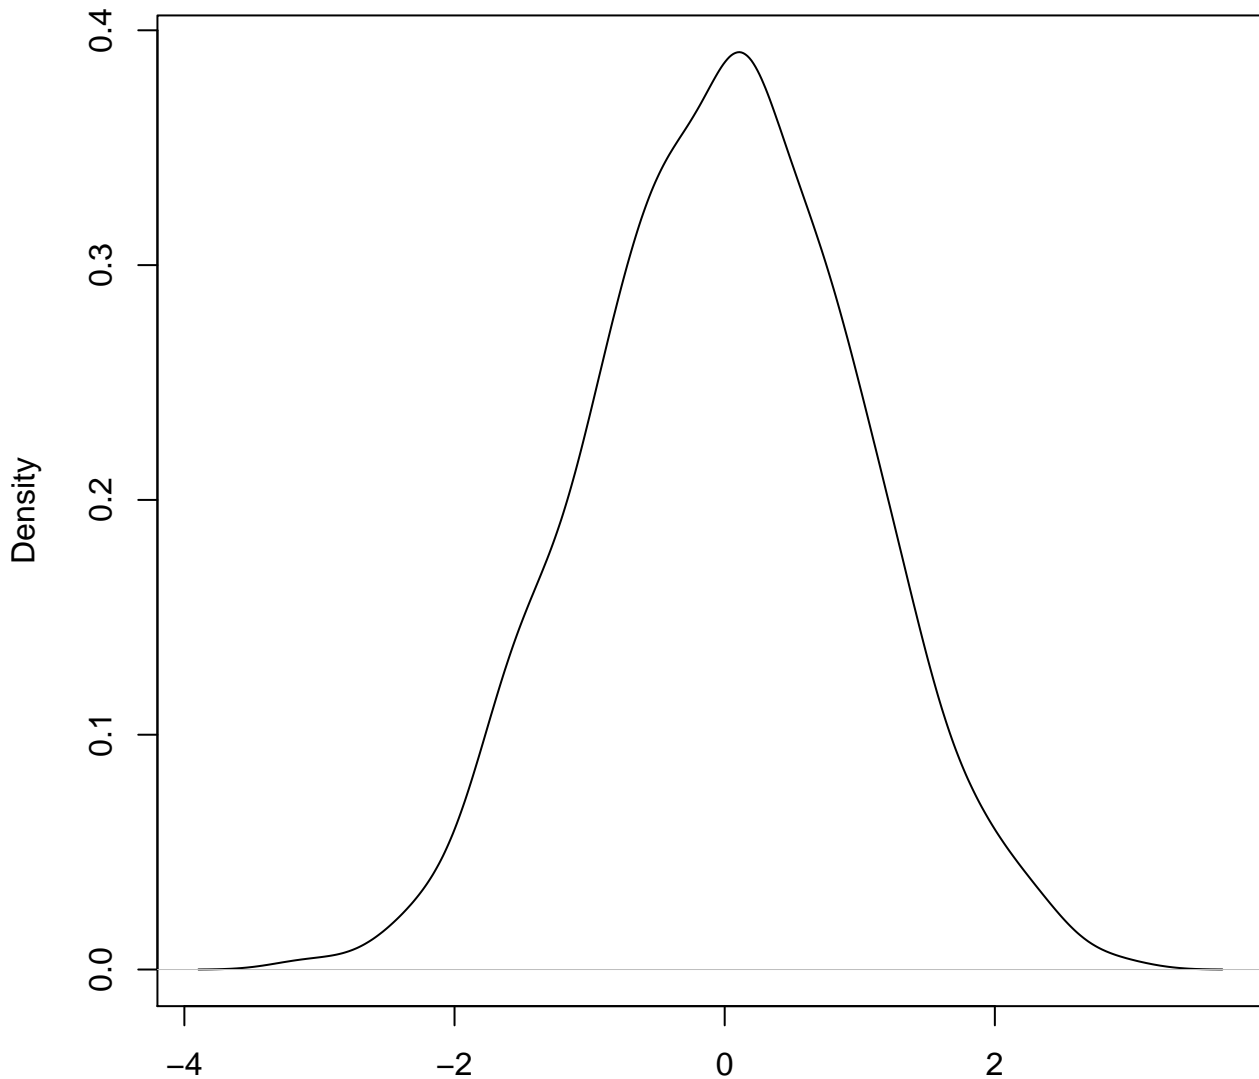

# Transformed gal-8 distribution

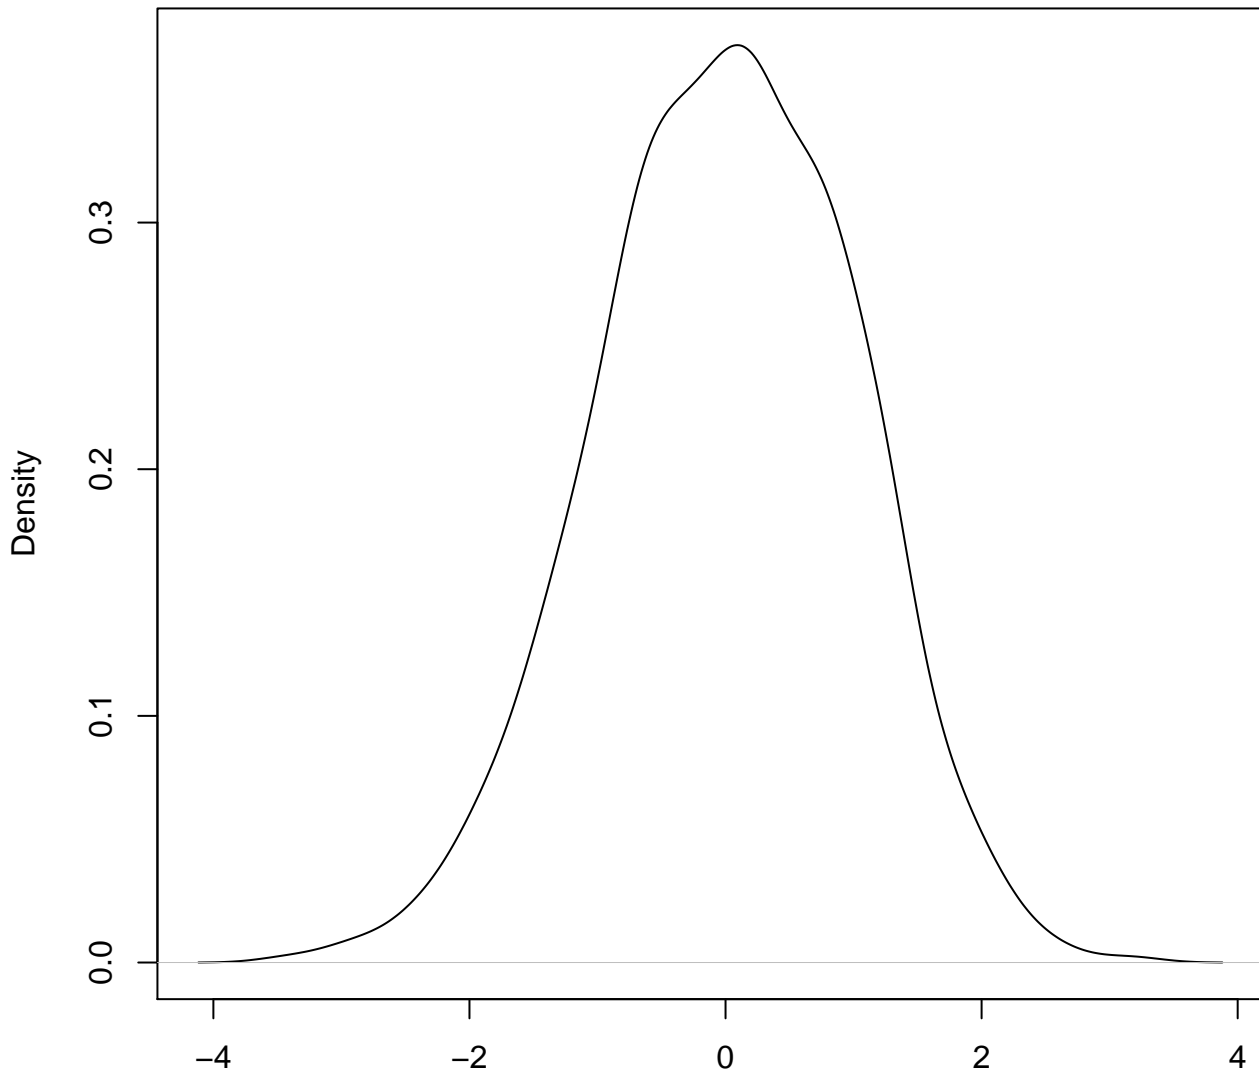

# Transformed BCAN distribution

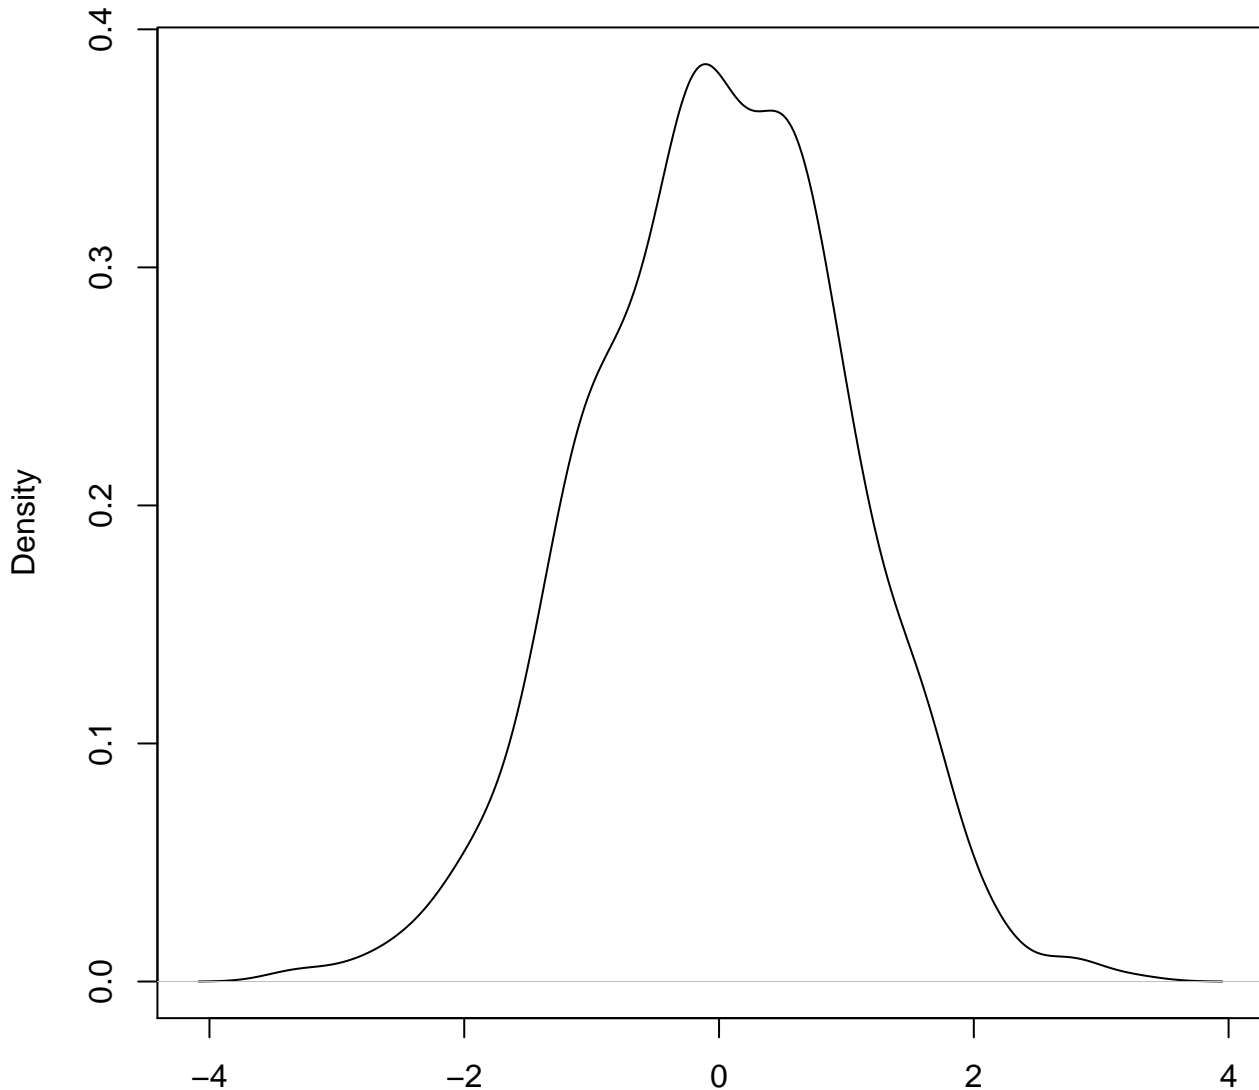

# Transformed LAYN distribution

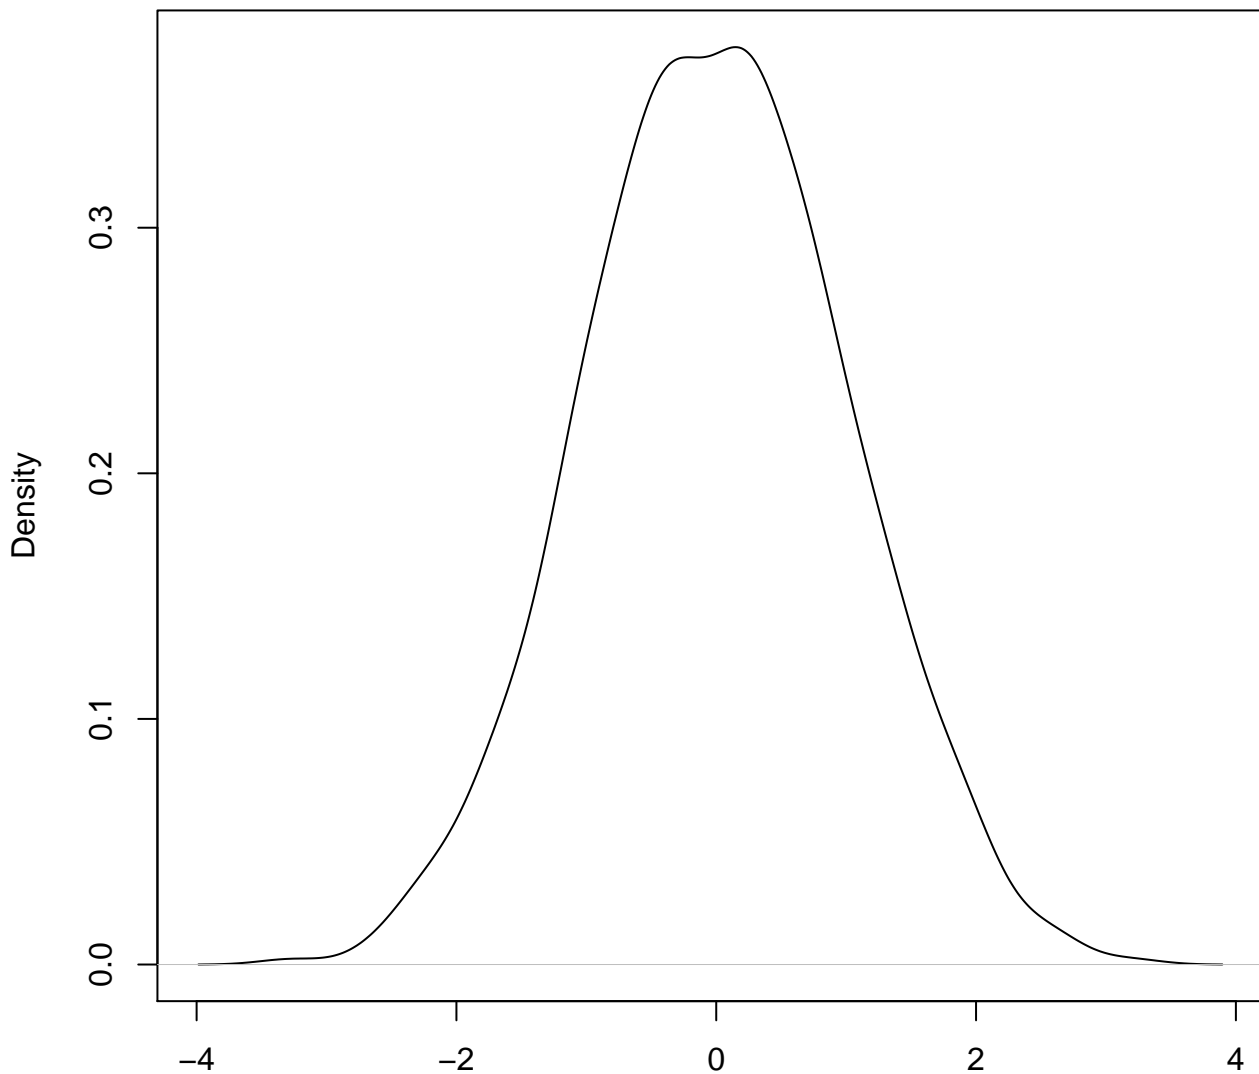



# Transformed NEP distribution

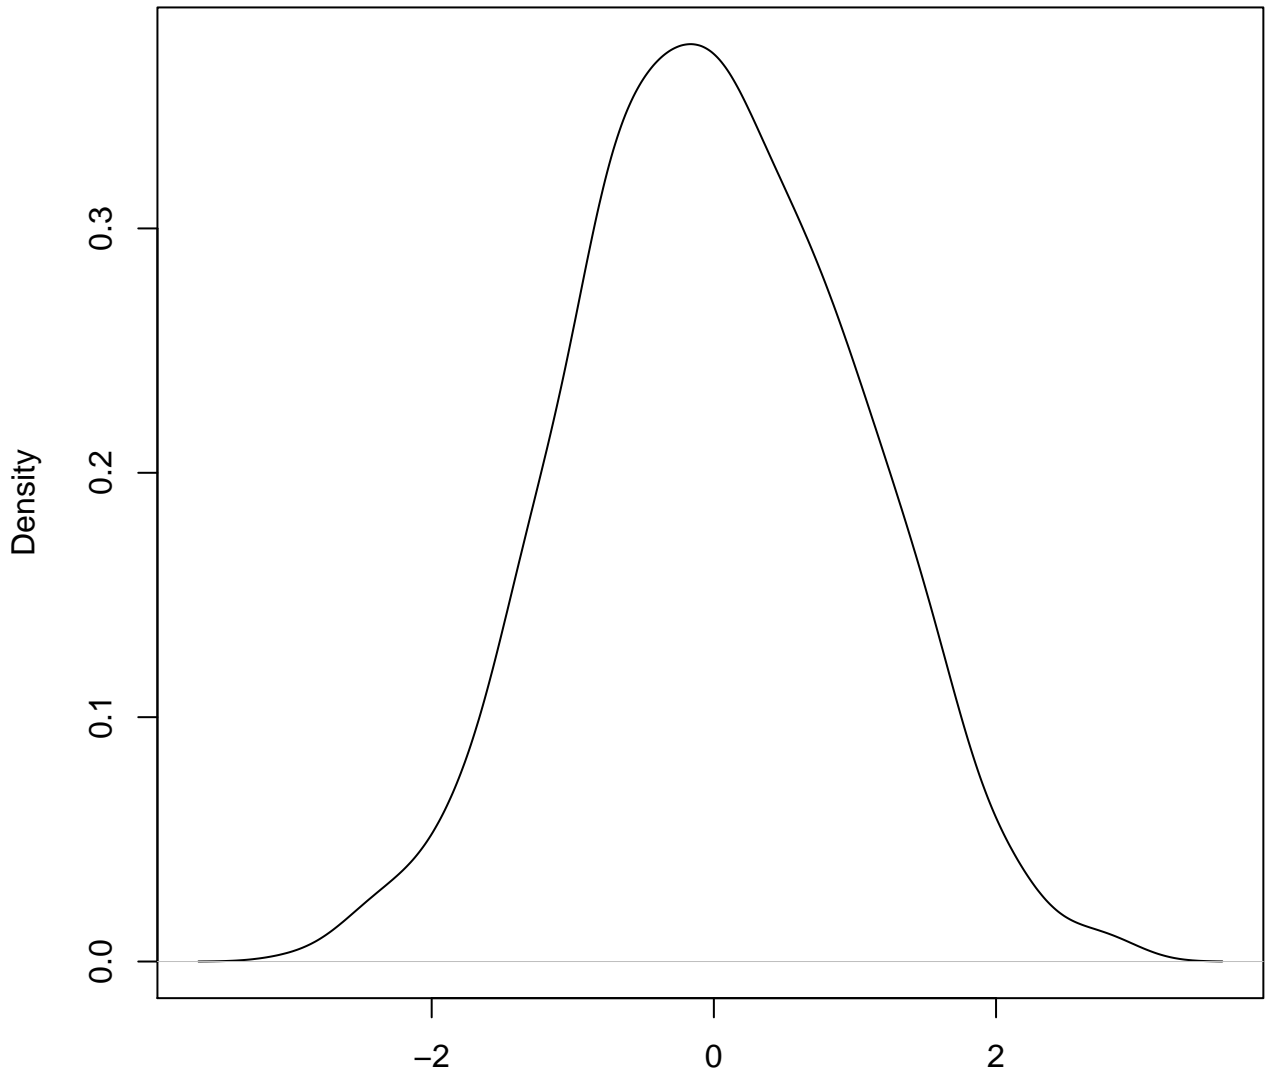

# Transformed GDF-8 distribution

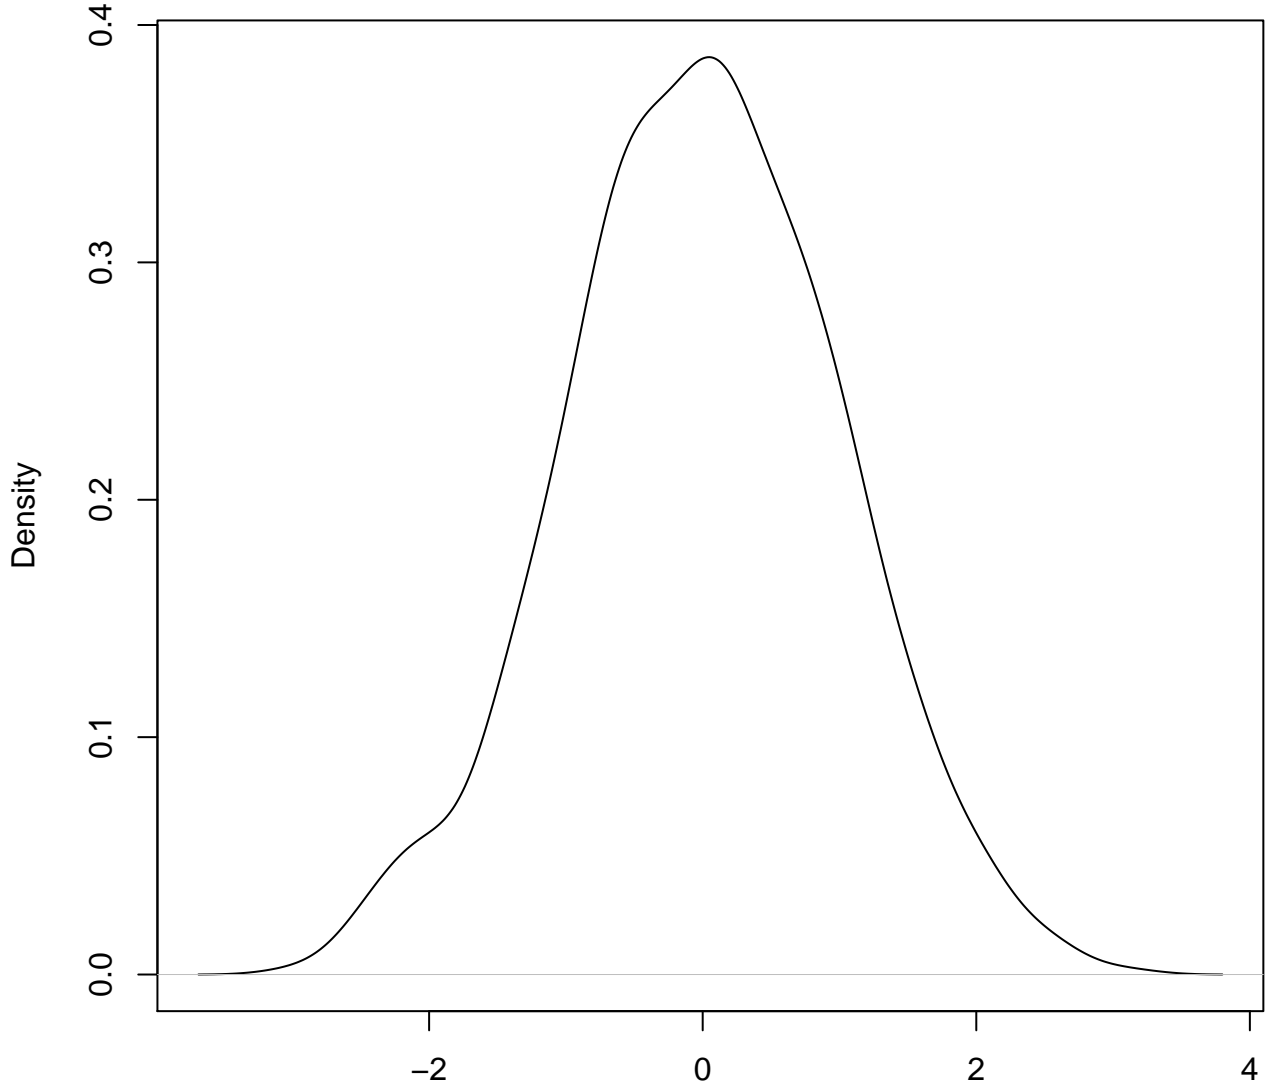

# Transformed THY 1 distribution

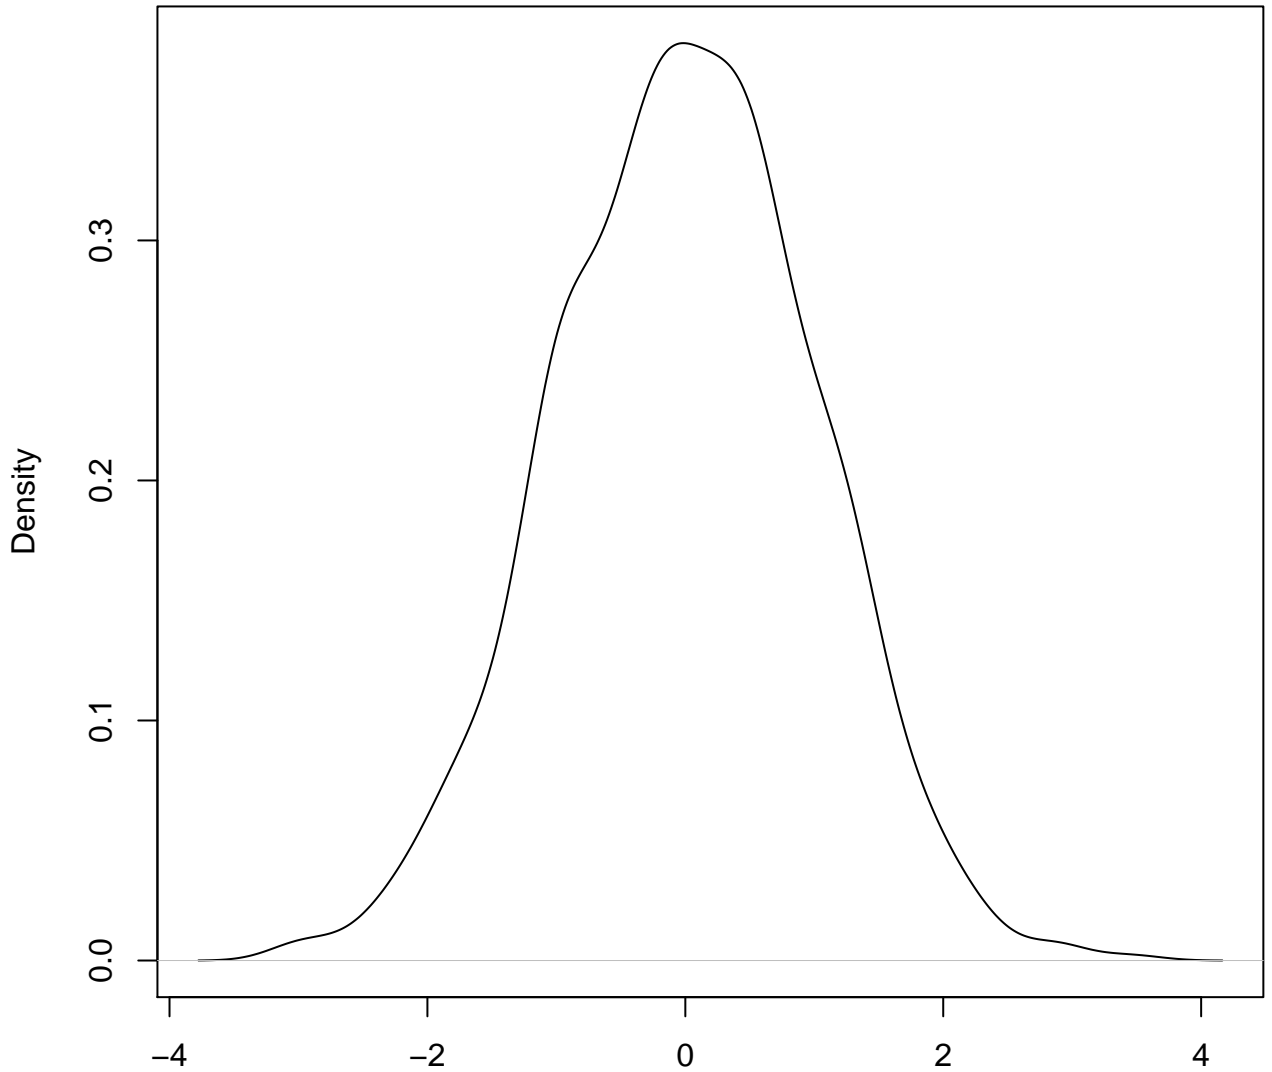

# Transformed WFIKKN1 distribution

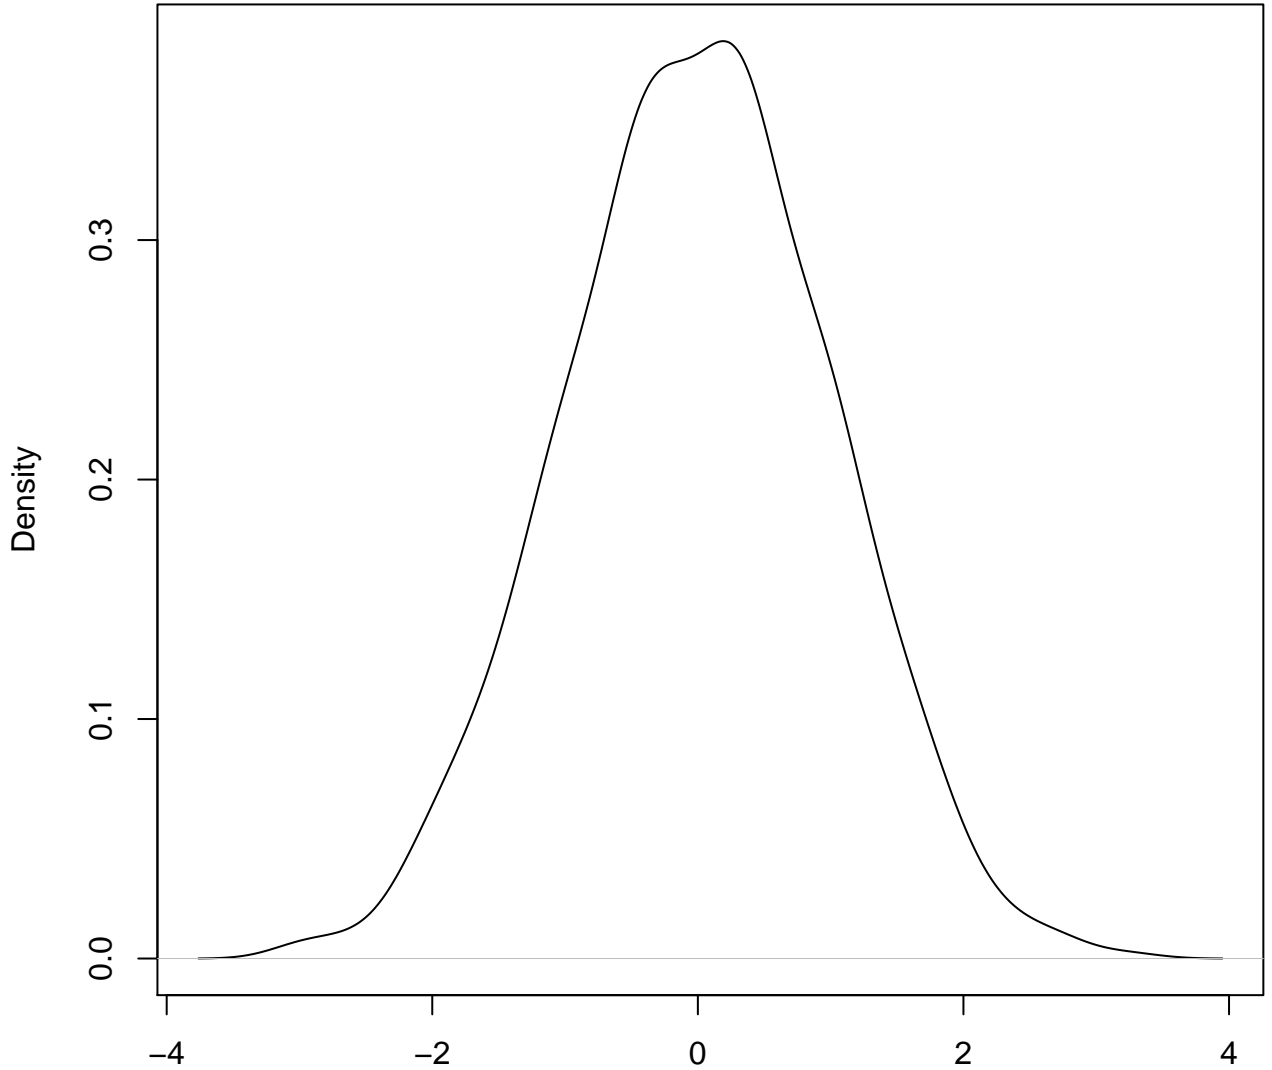

# Transformed Tmprss5 distribution

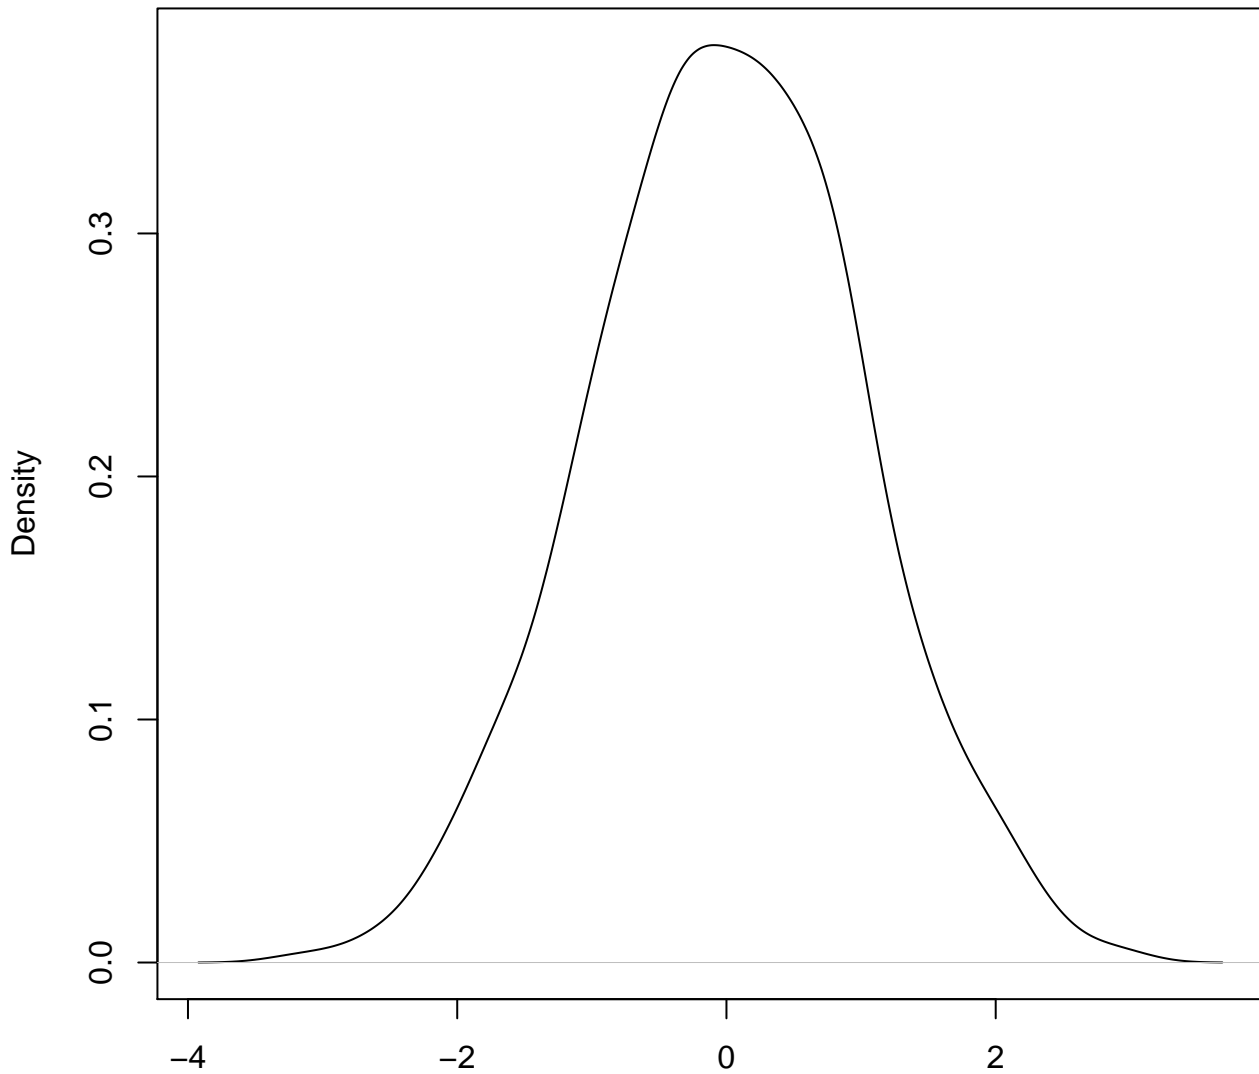

# Transformed CDH3 distribution

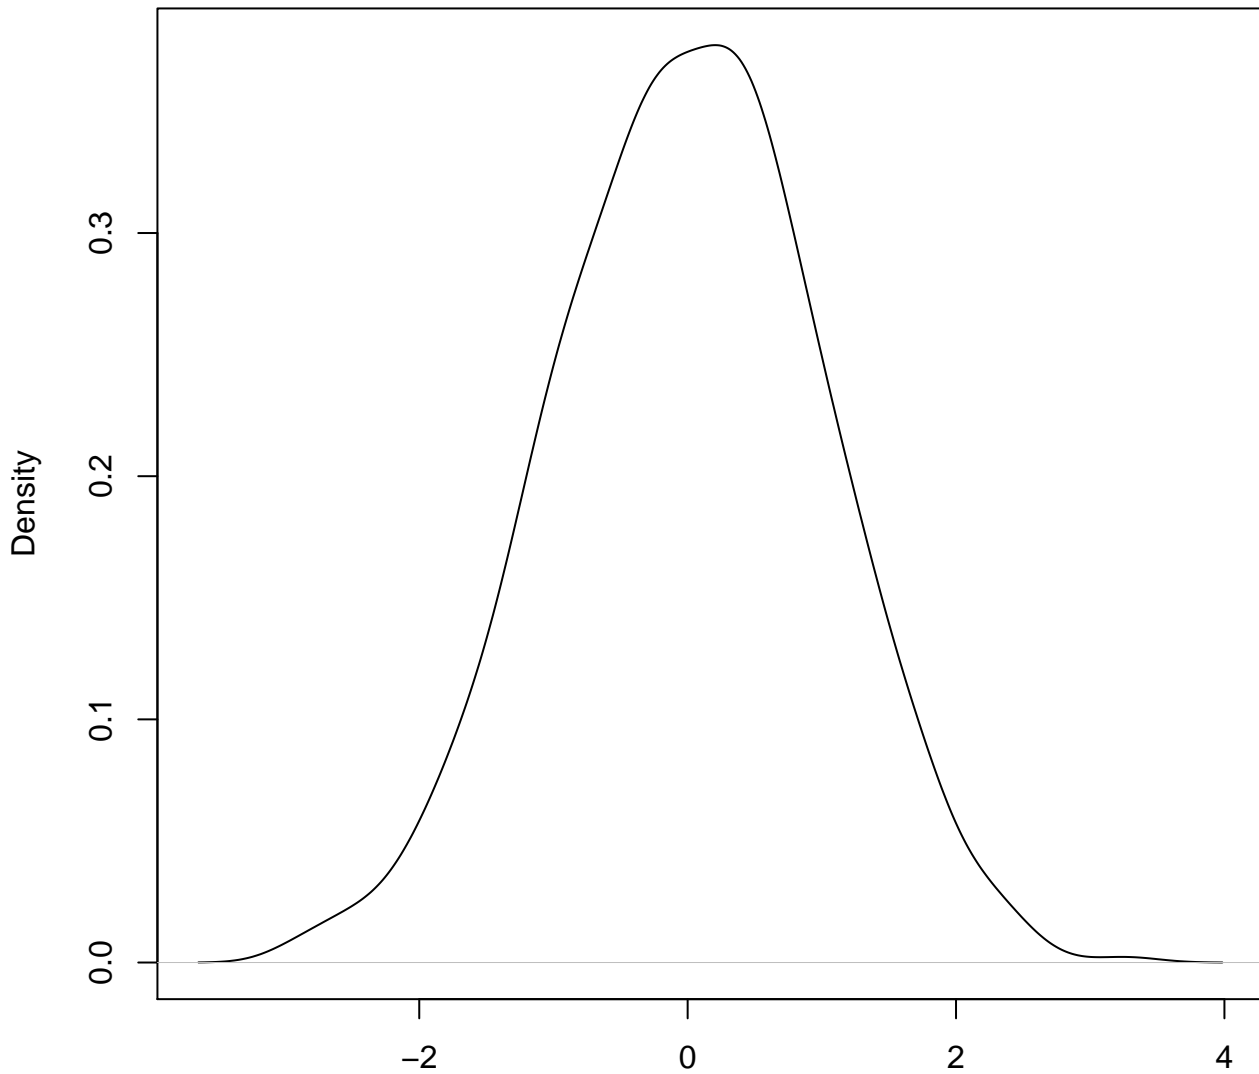

# Transformed GFR-alpha-1 distribution

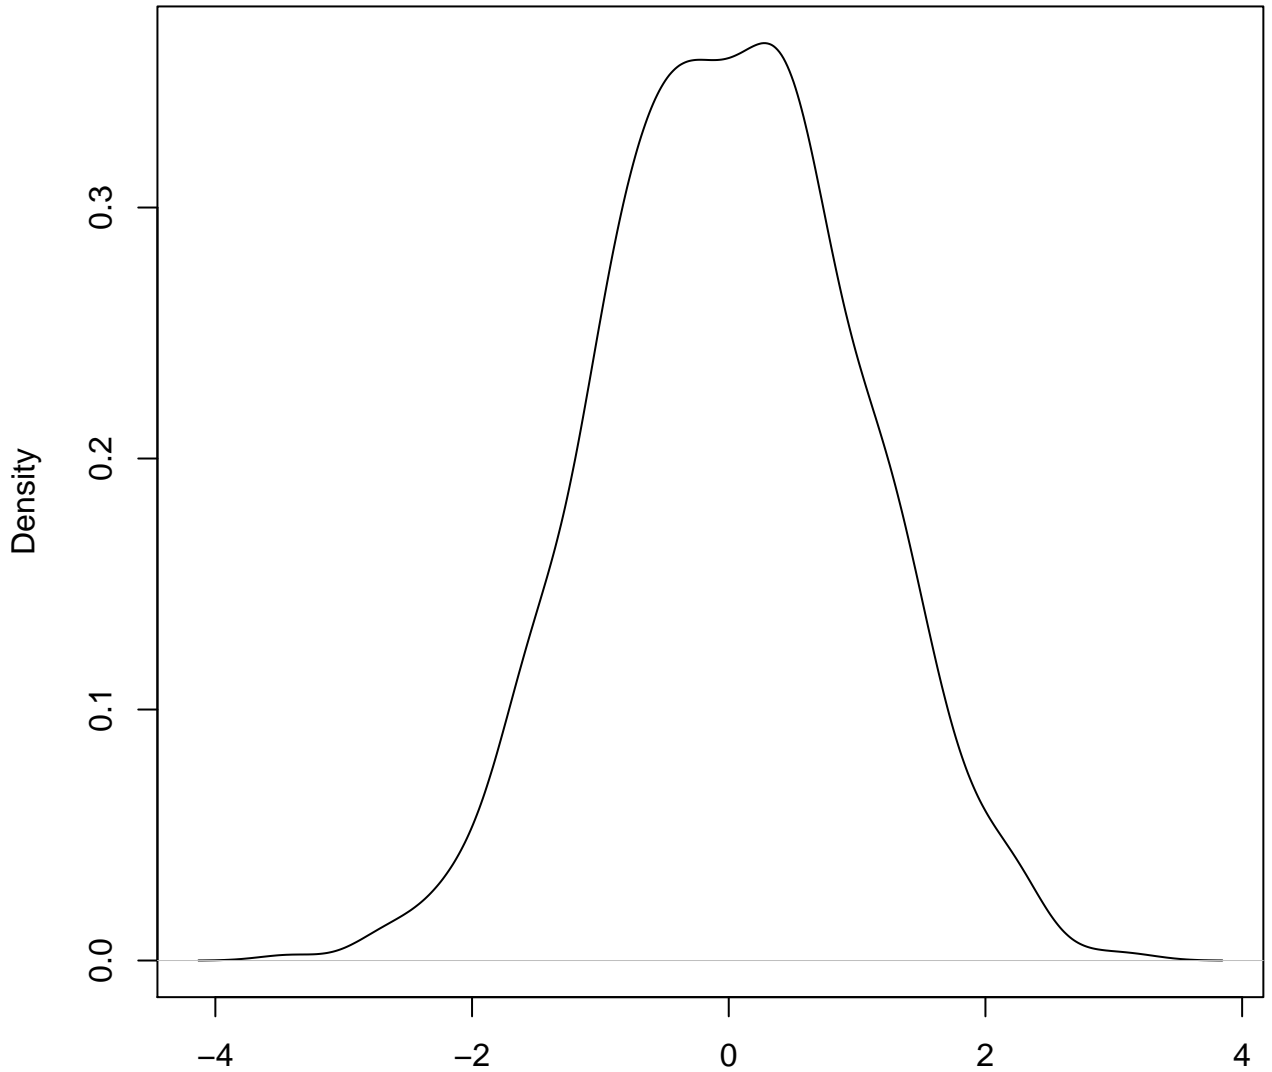

# Transformed GM-CSF-R-alpha distribution

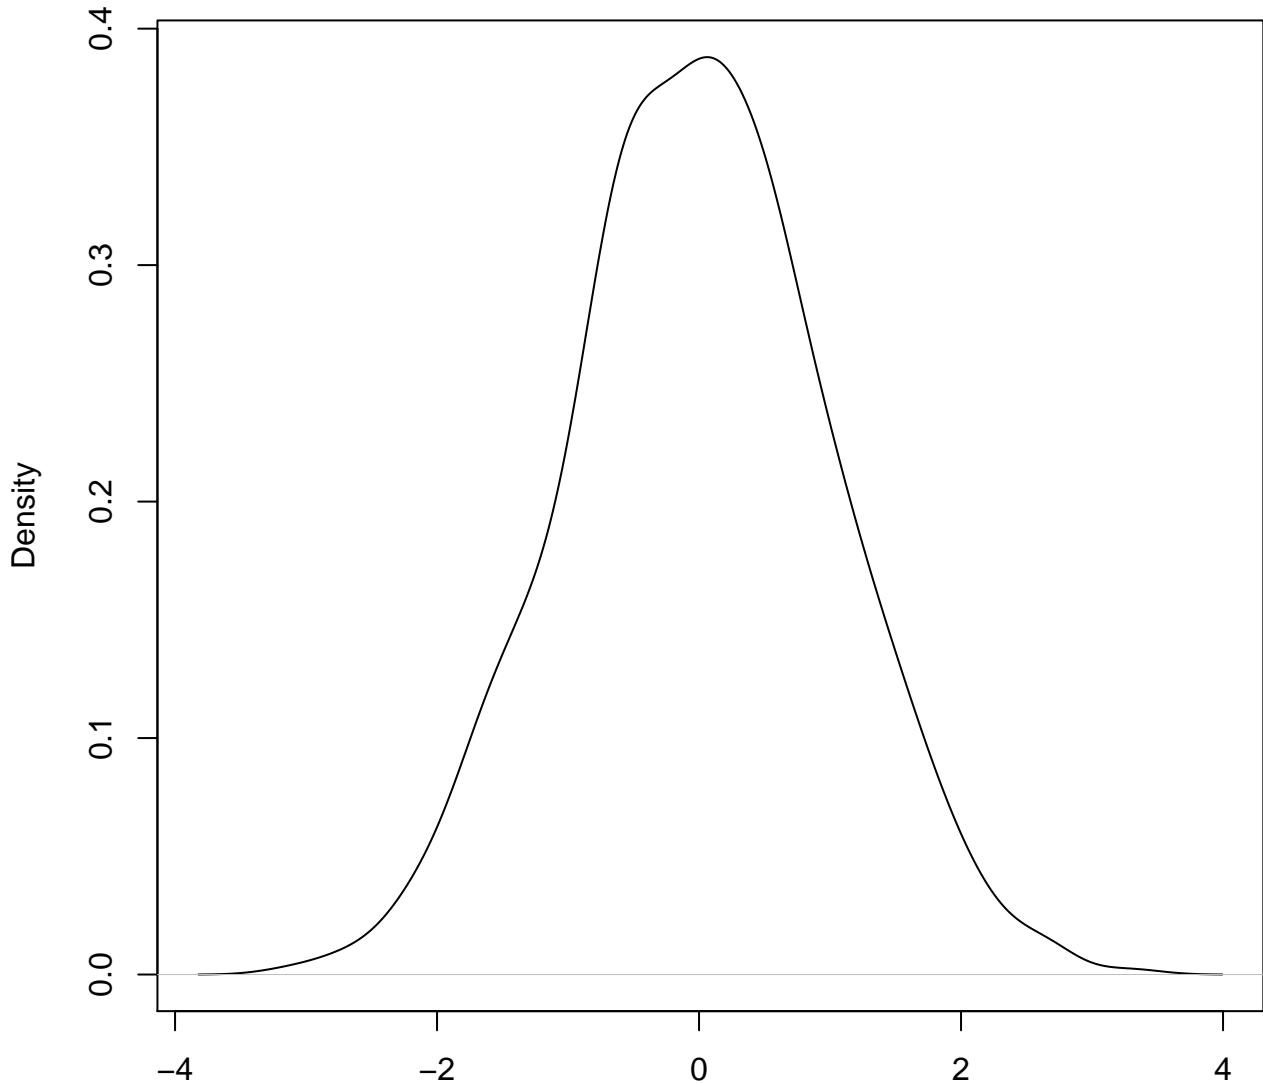



# Transformed Beta-NGF distribution

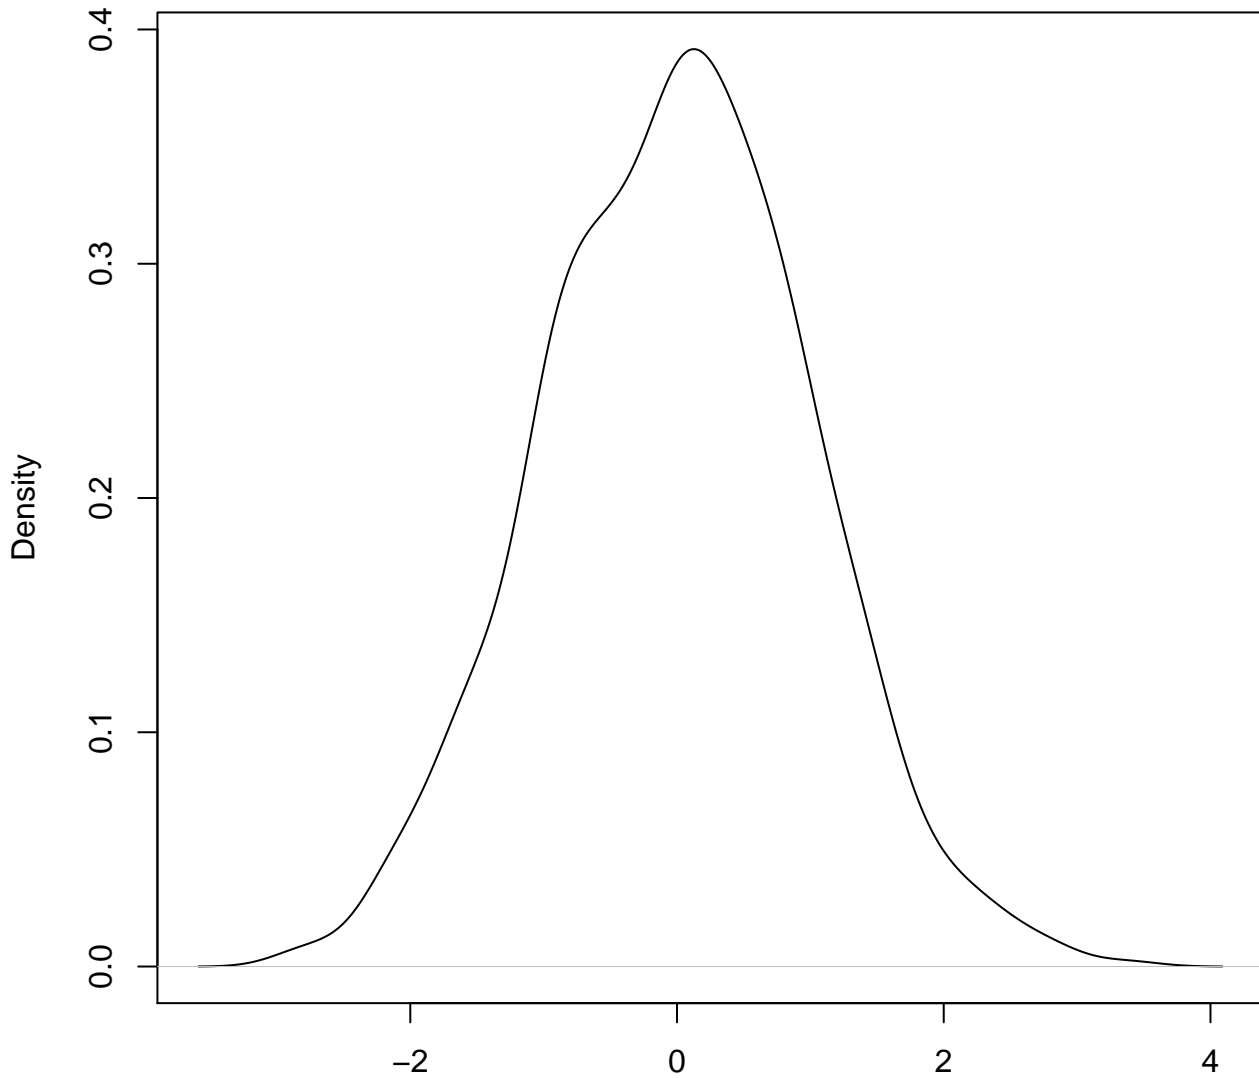

# Transformed SCARA5 distribution

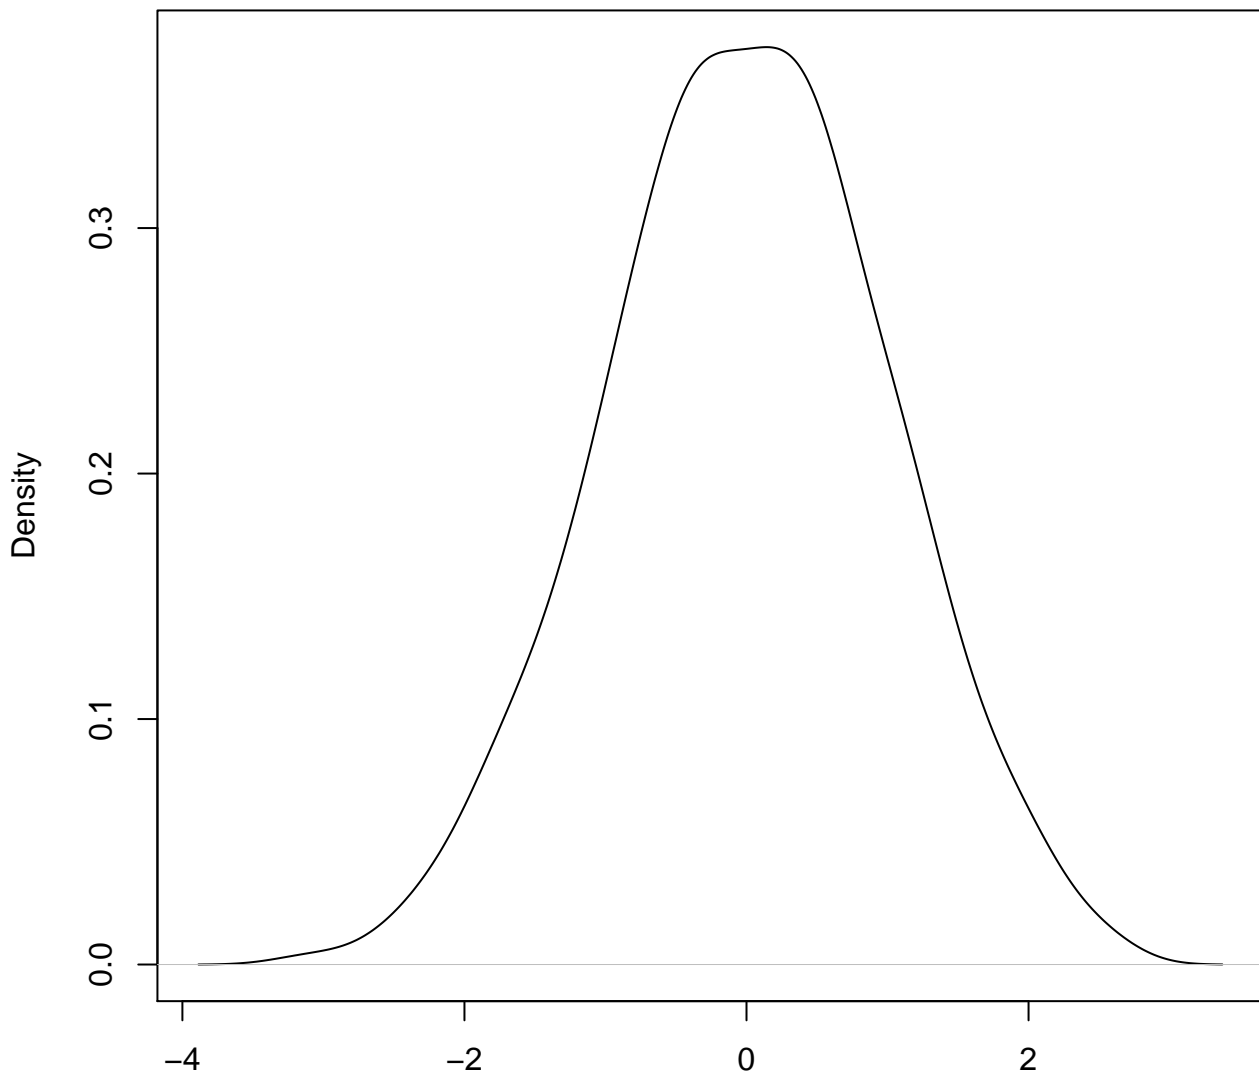

**Transformed CD200 distribution**

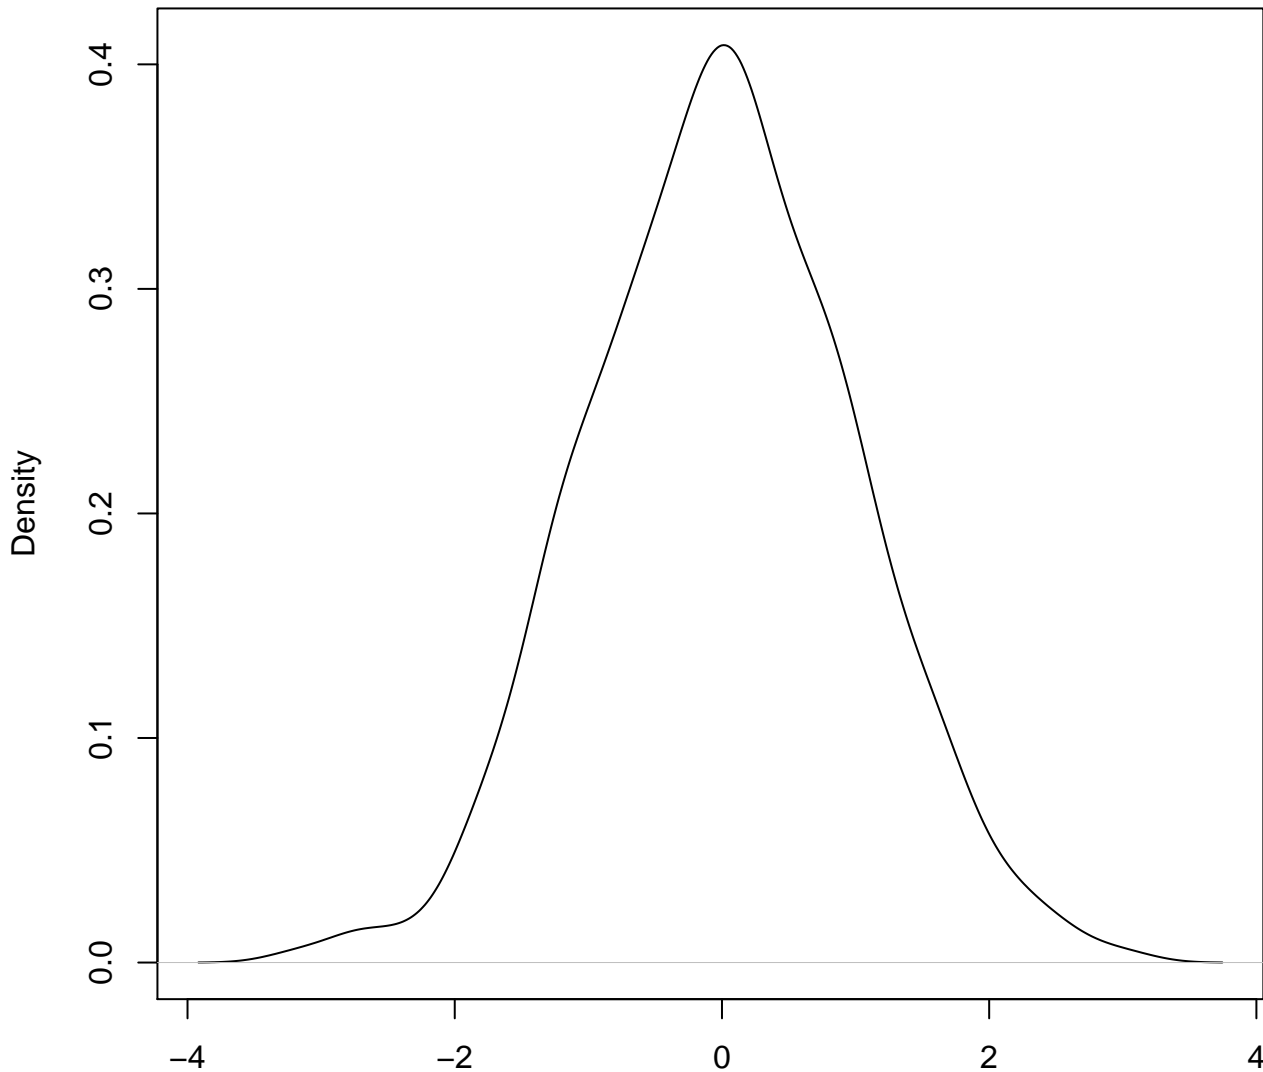

# Transformed NTRK2 distribution

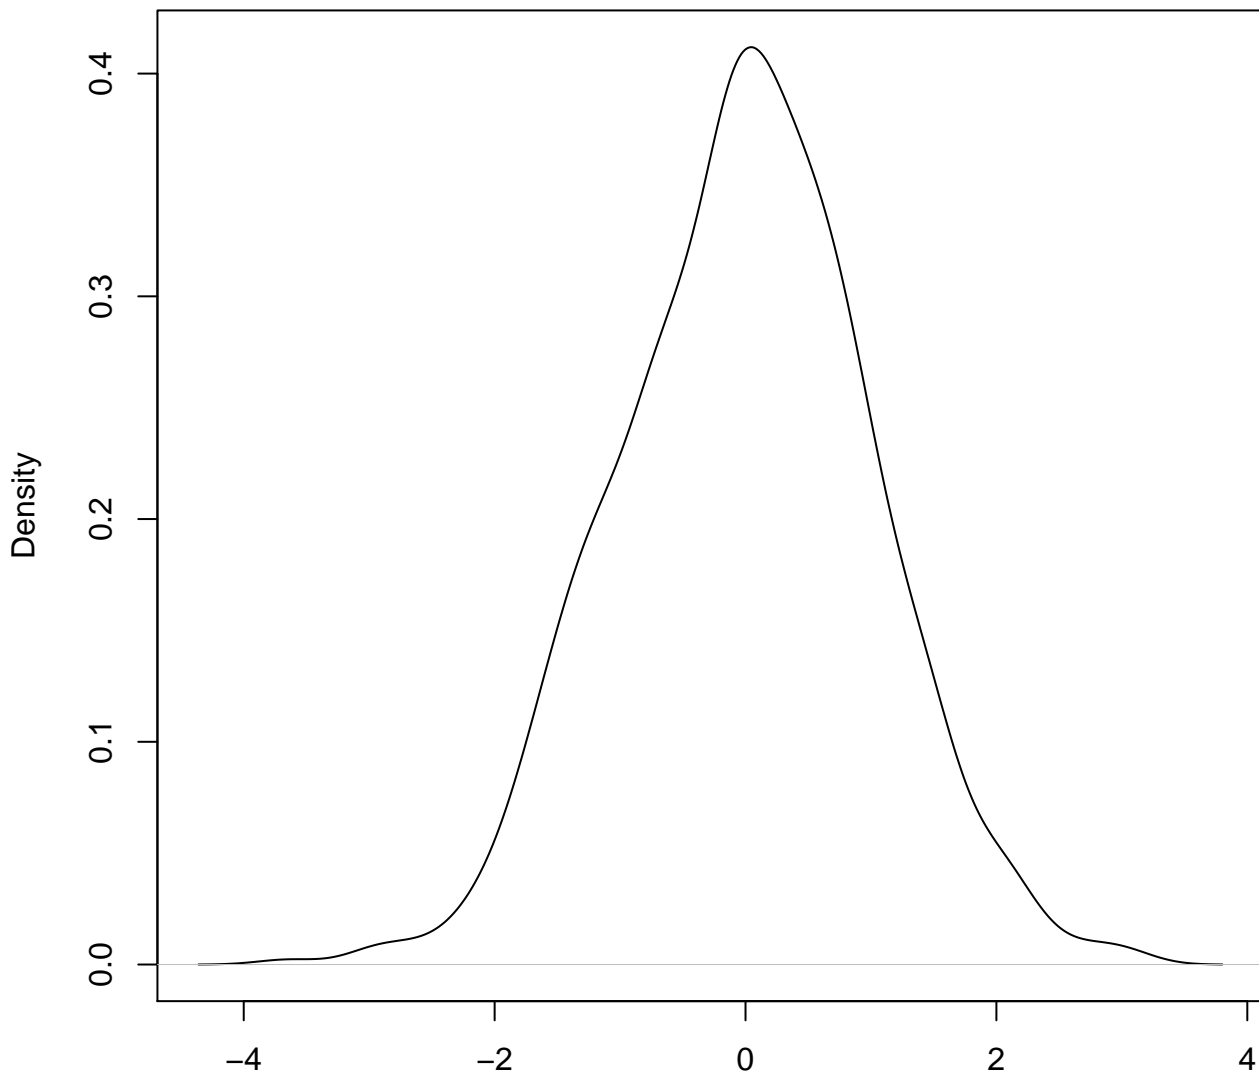

# Transformed GZMA distribution

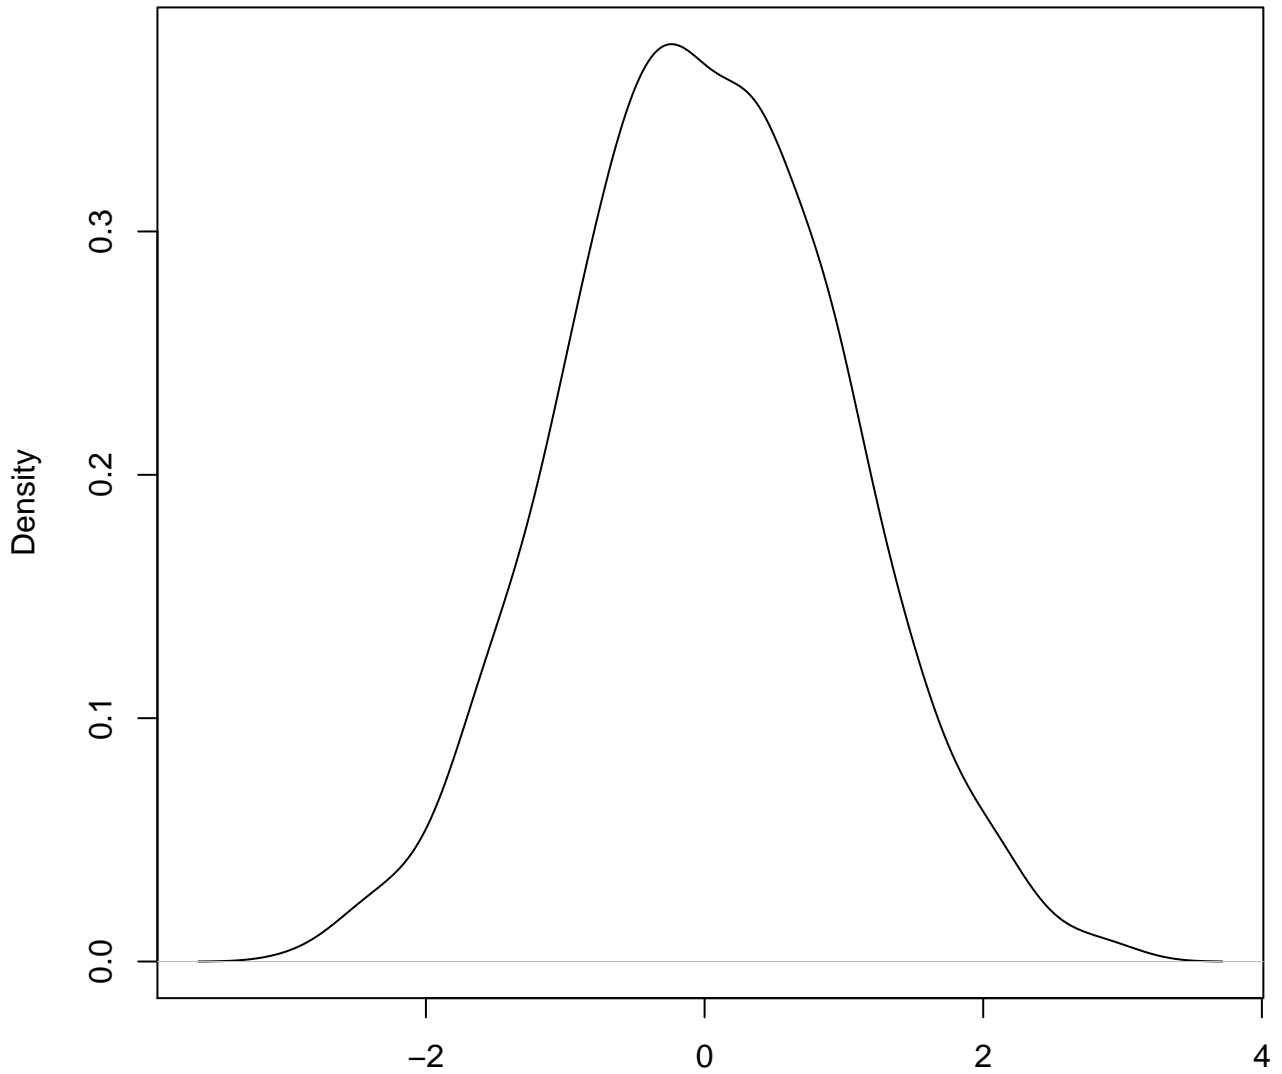

# Transformed G-CSF distribution

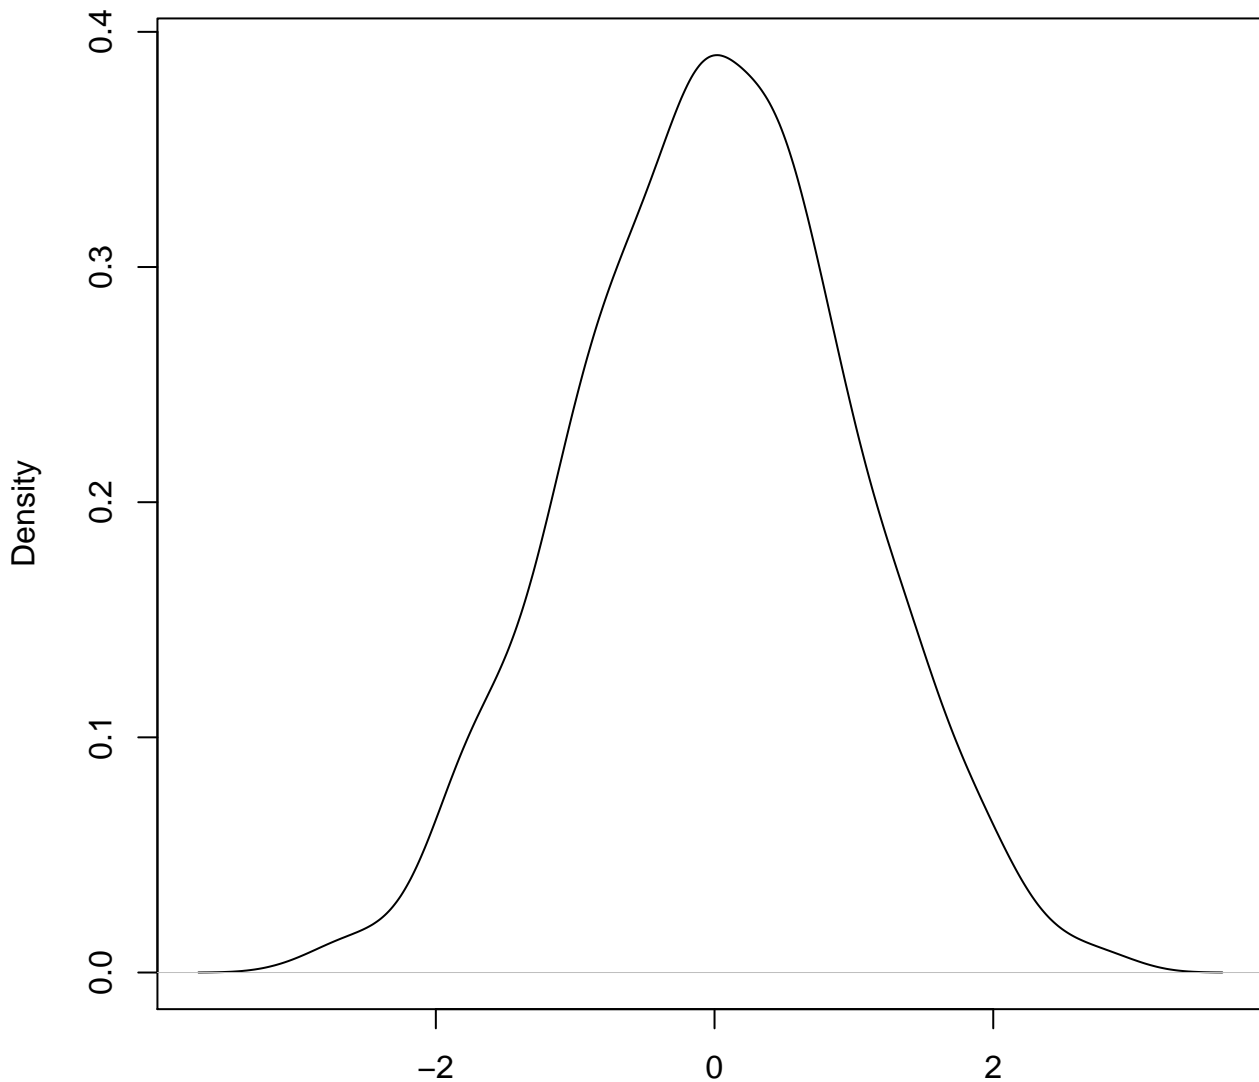

# Transformed DRAXIN distribution

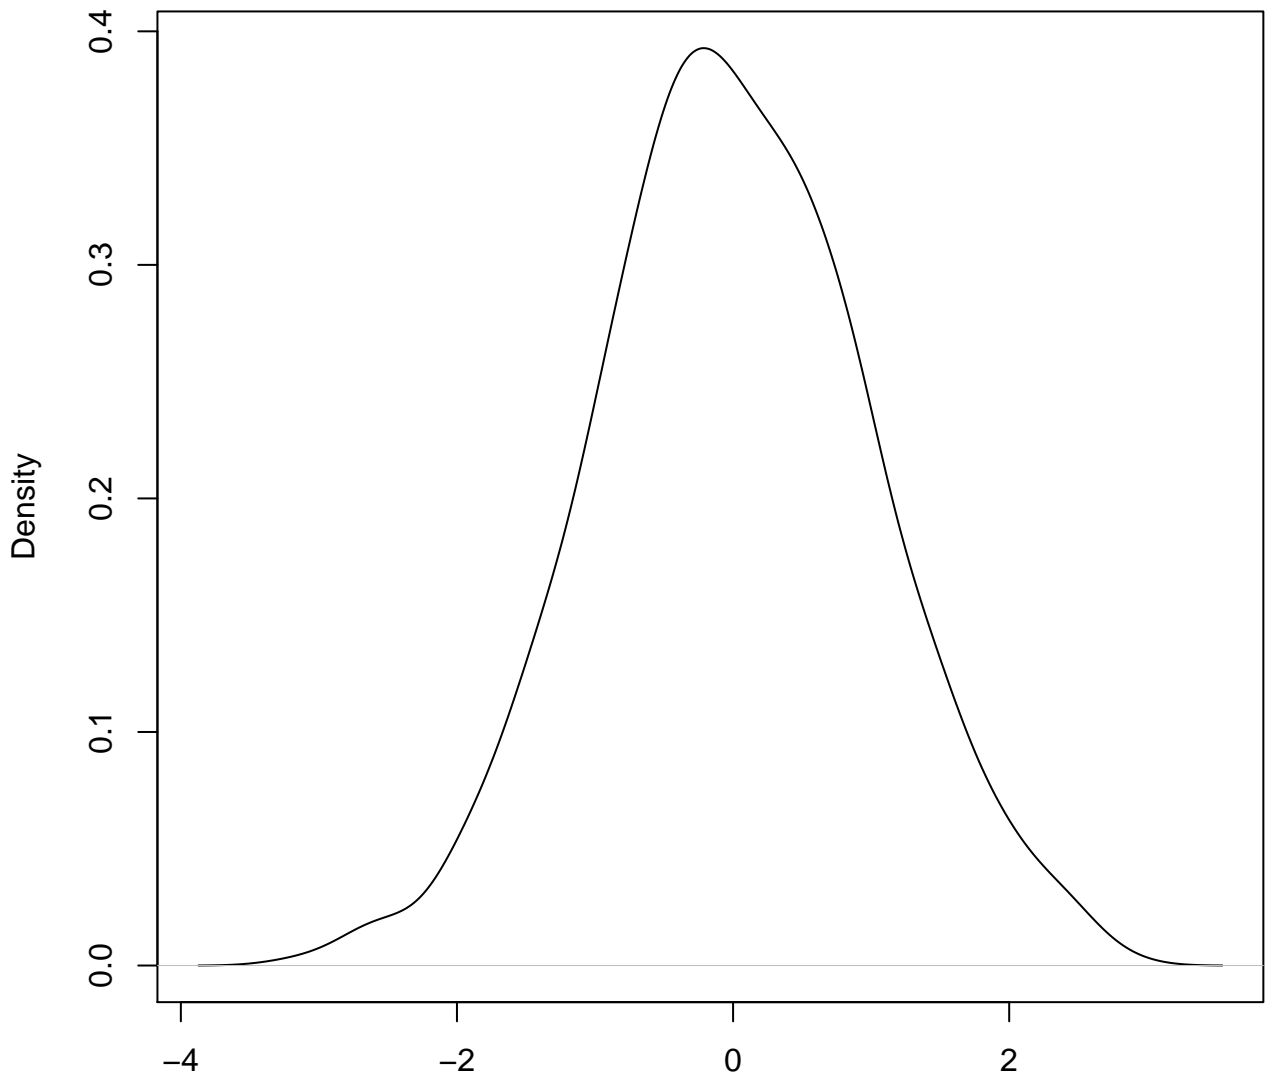

# Transformed SCARF2 distribution

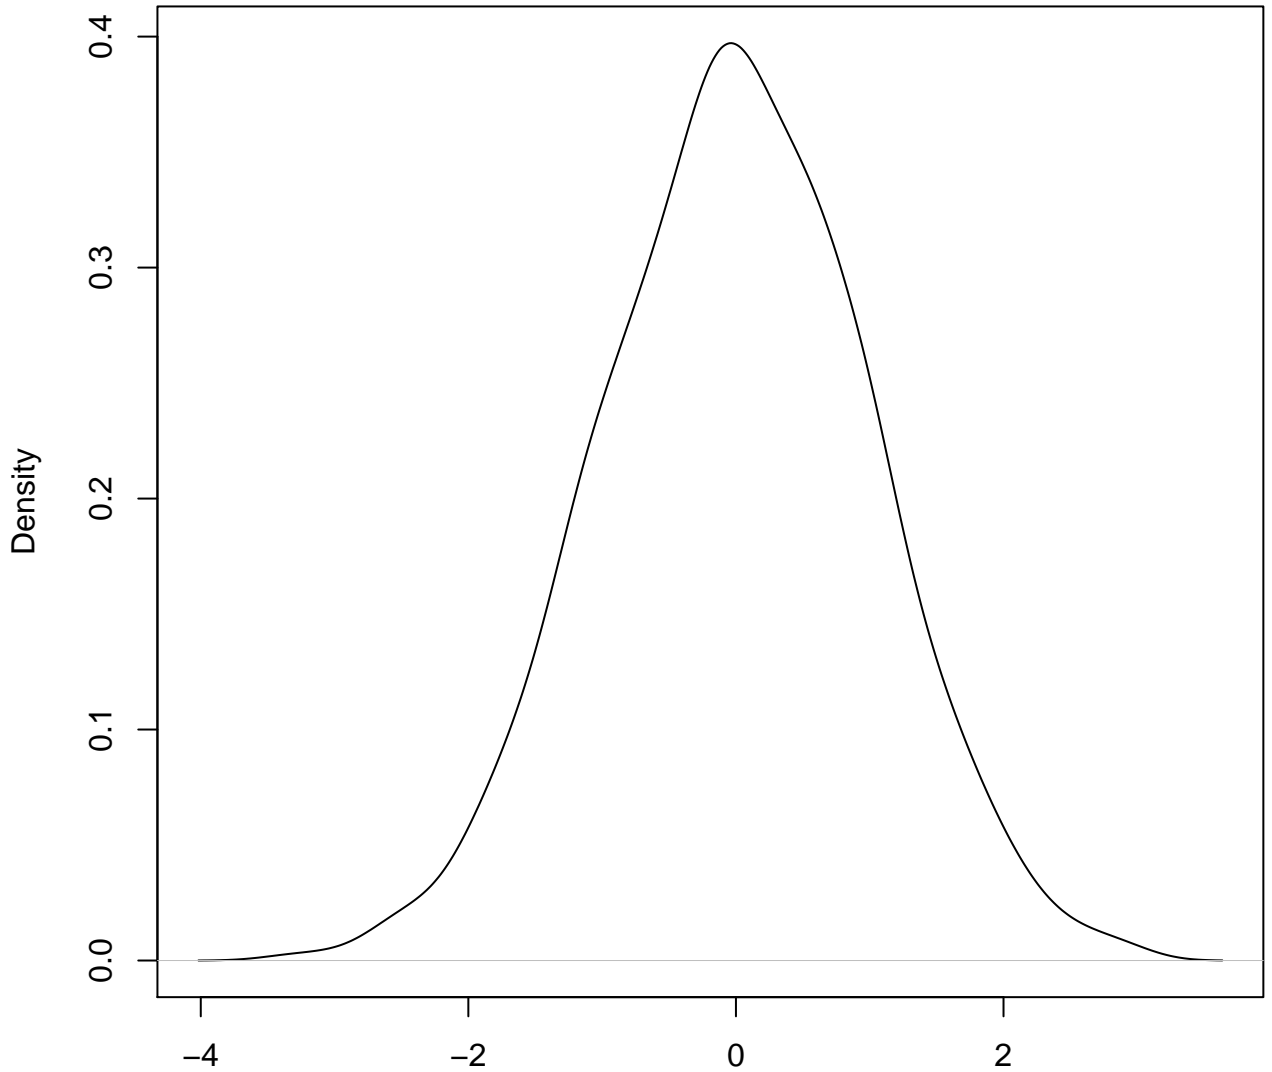



# Transformed GDNFR-alpha-3 distribution

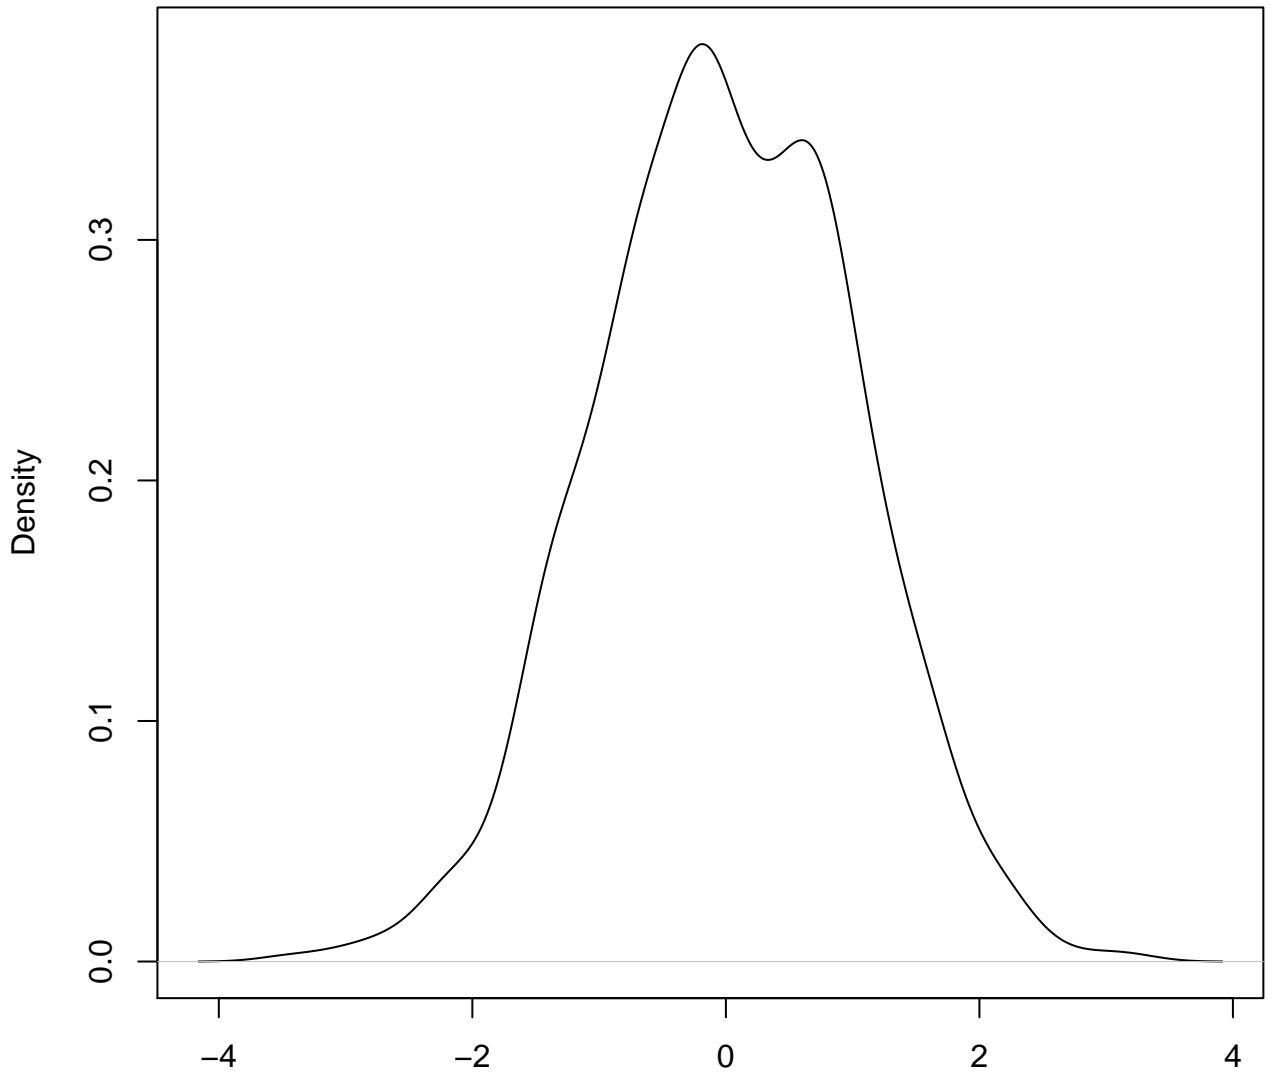

# Transformed PVR distribution

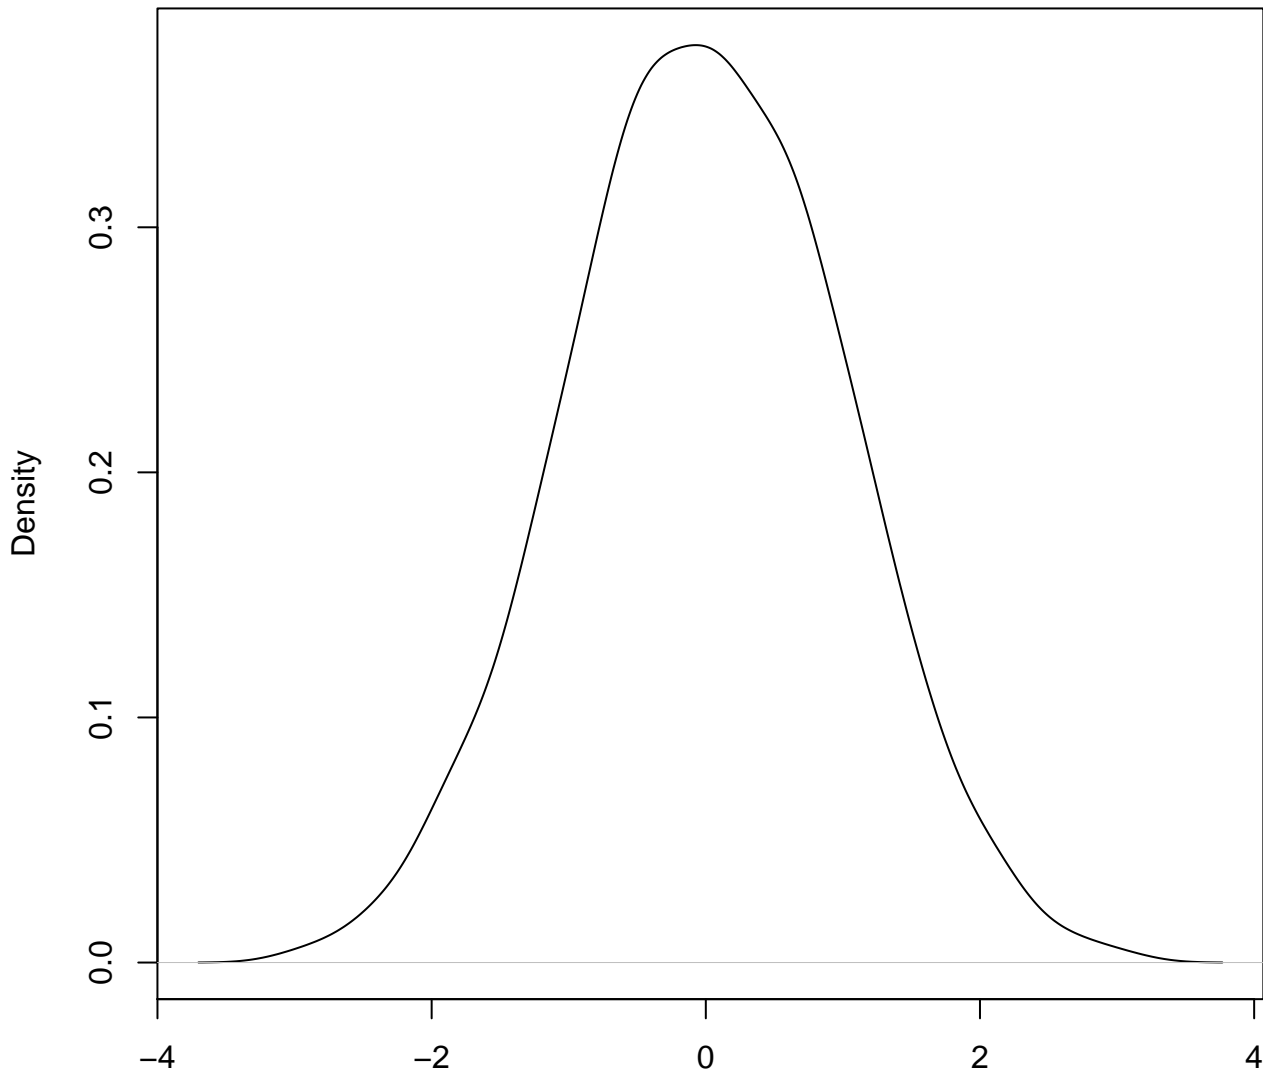

# Transformed TNFRSF12A distribution

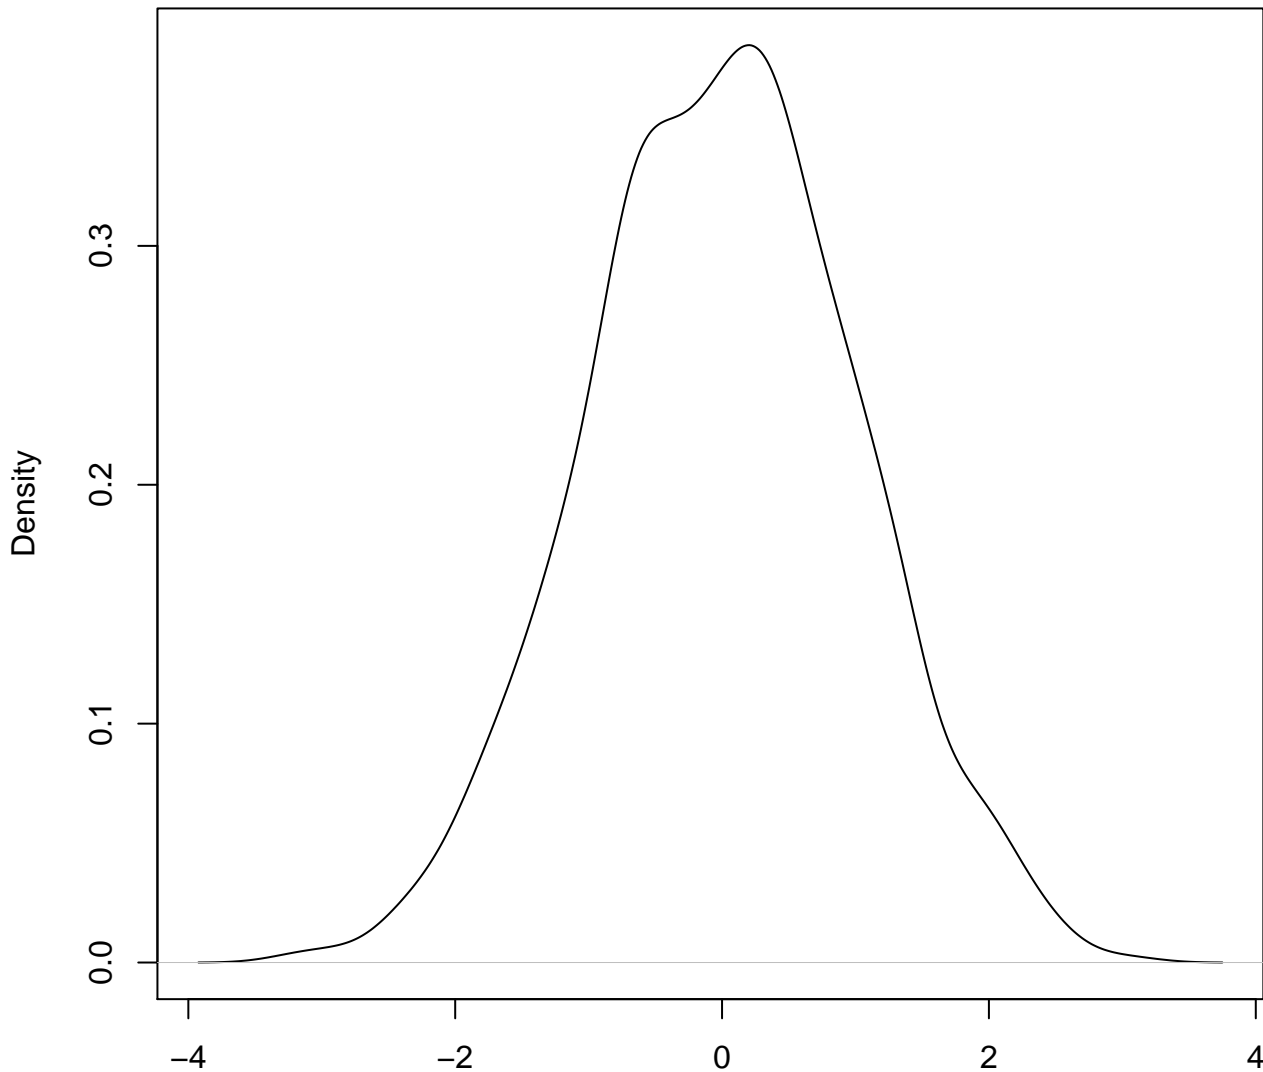

# Transformed SKR3 distribution

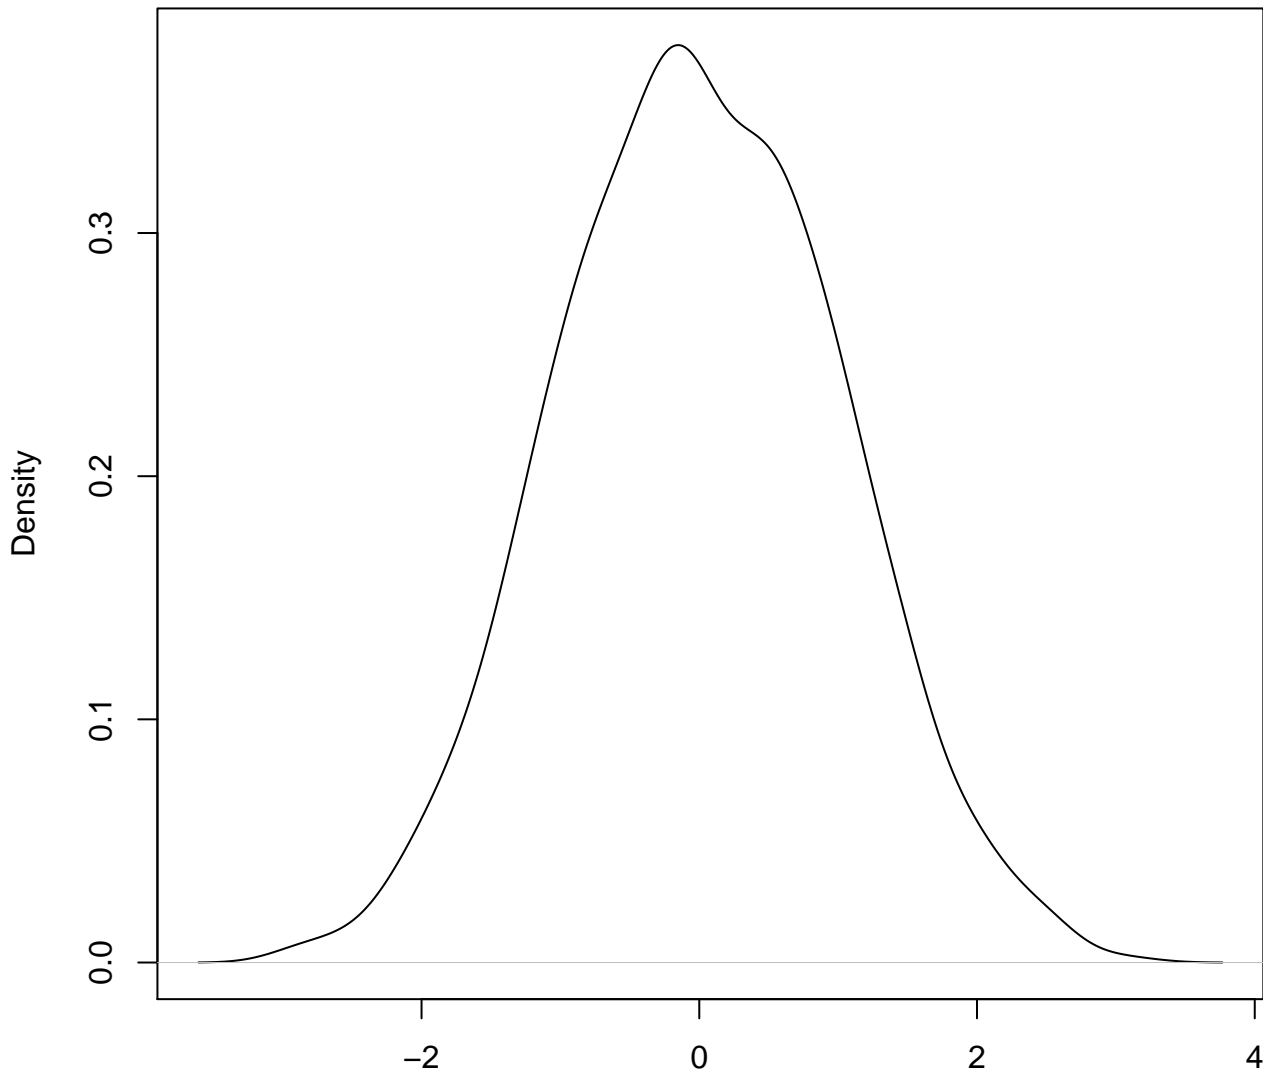

# Transformed FLRT2 distribution

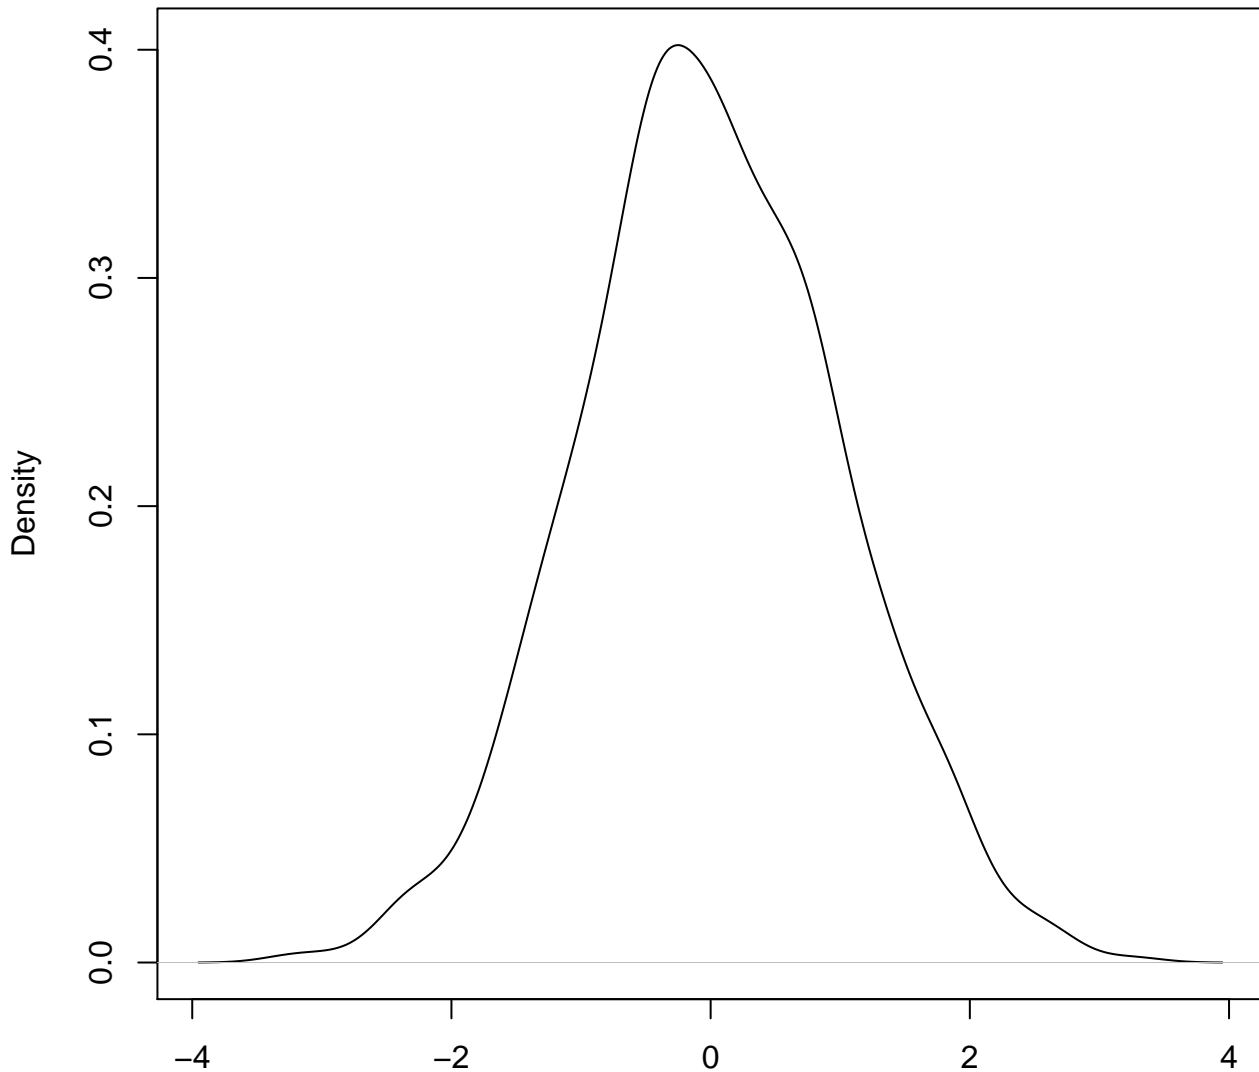

# Transformed CPM distribution

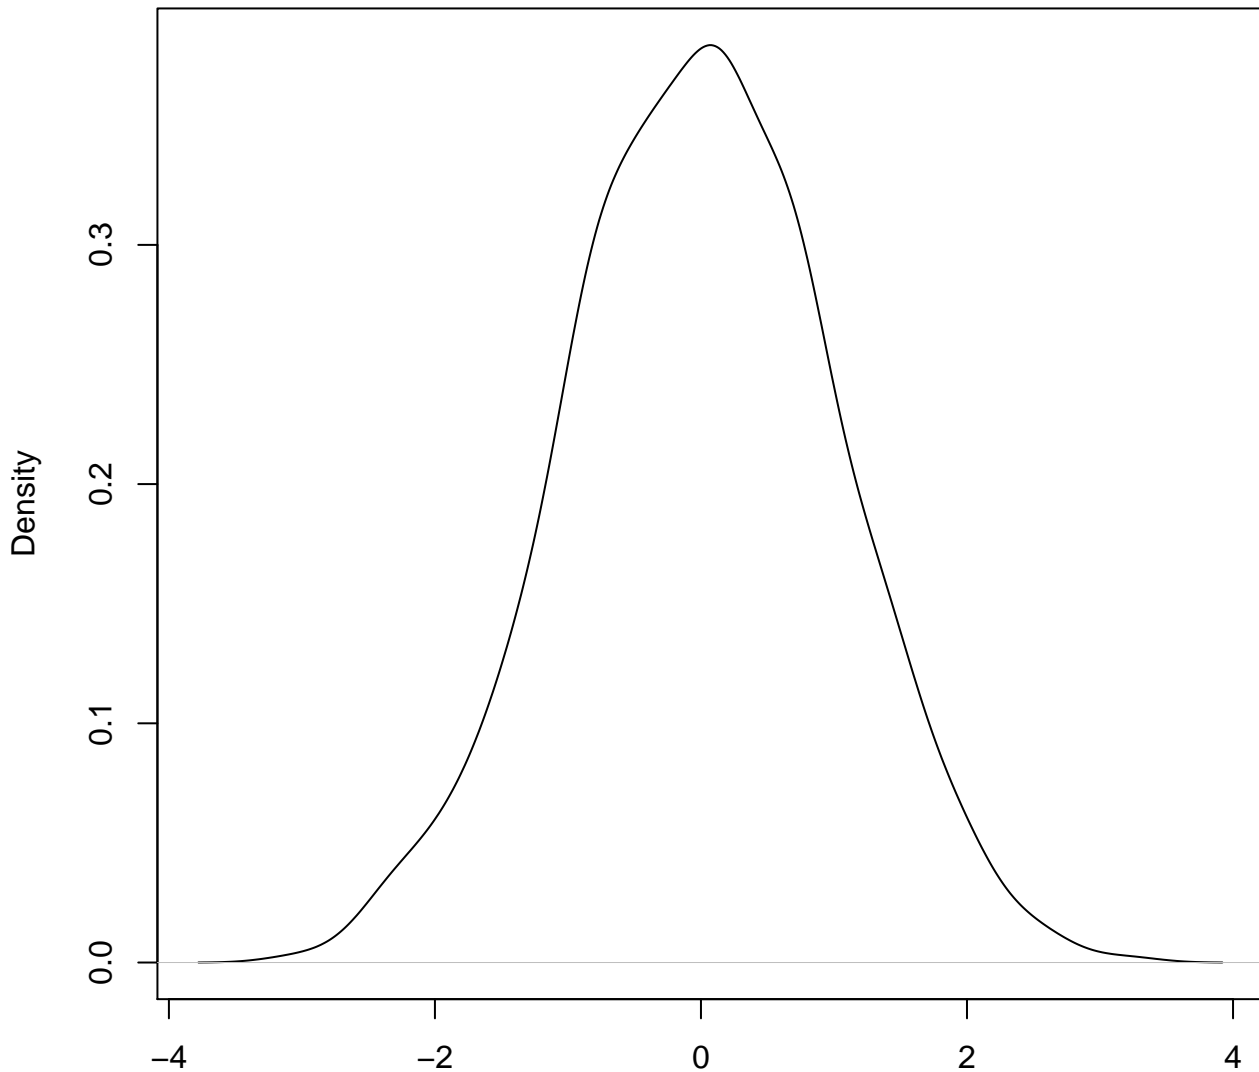

# Transformed CLEC10A distribution

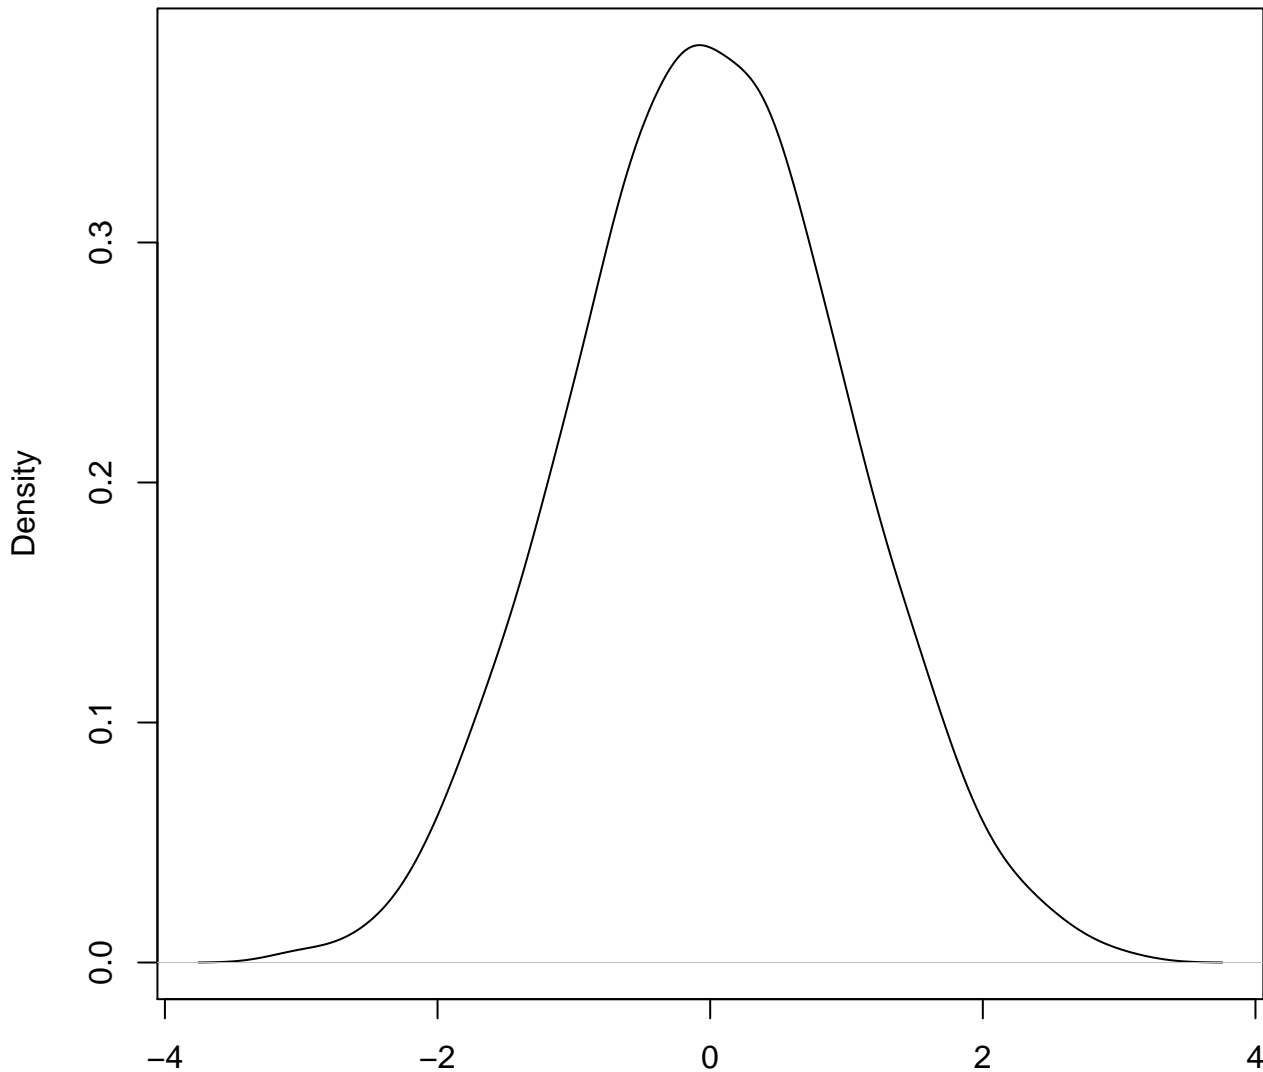

# Transformed GCP5 distribution

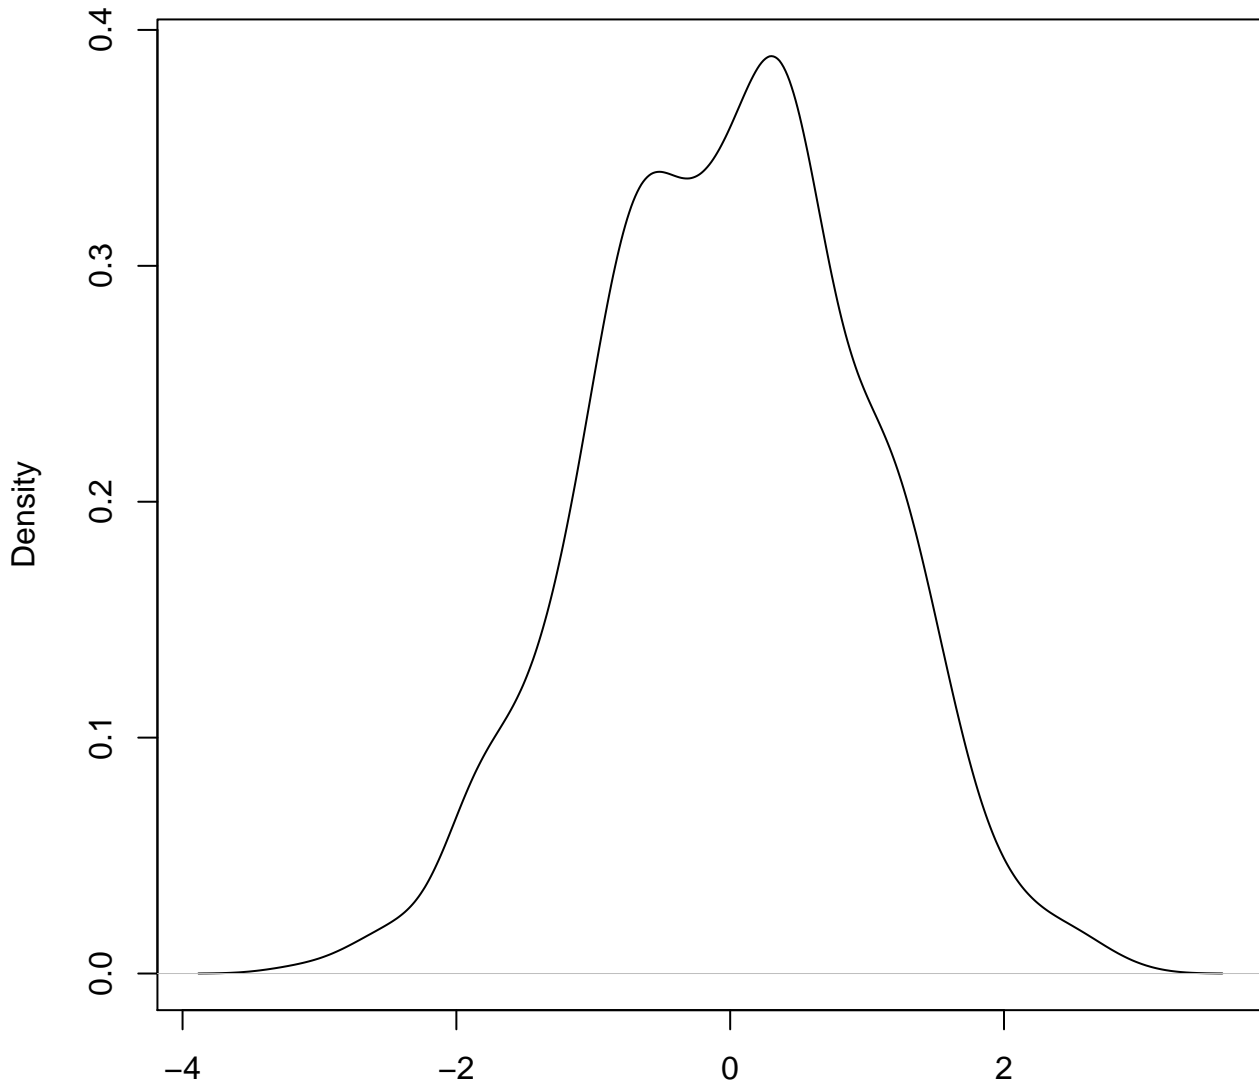



# Transformed BMP-4 distribution

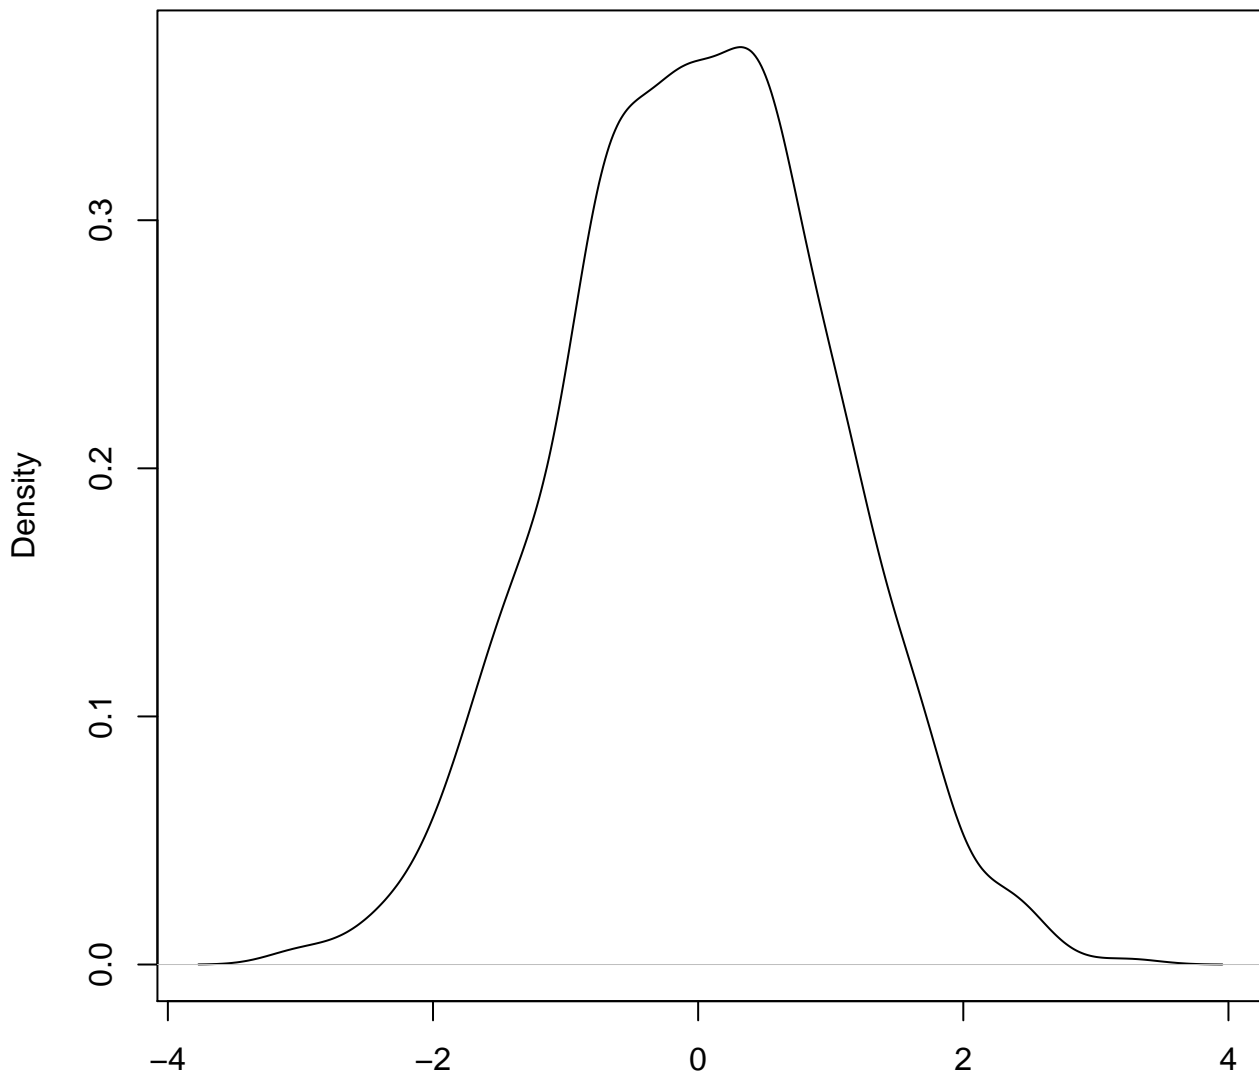

# Transformed FcRL2 distribution

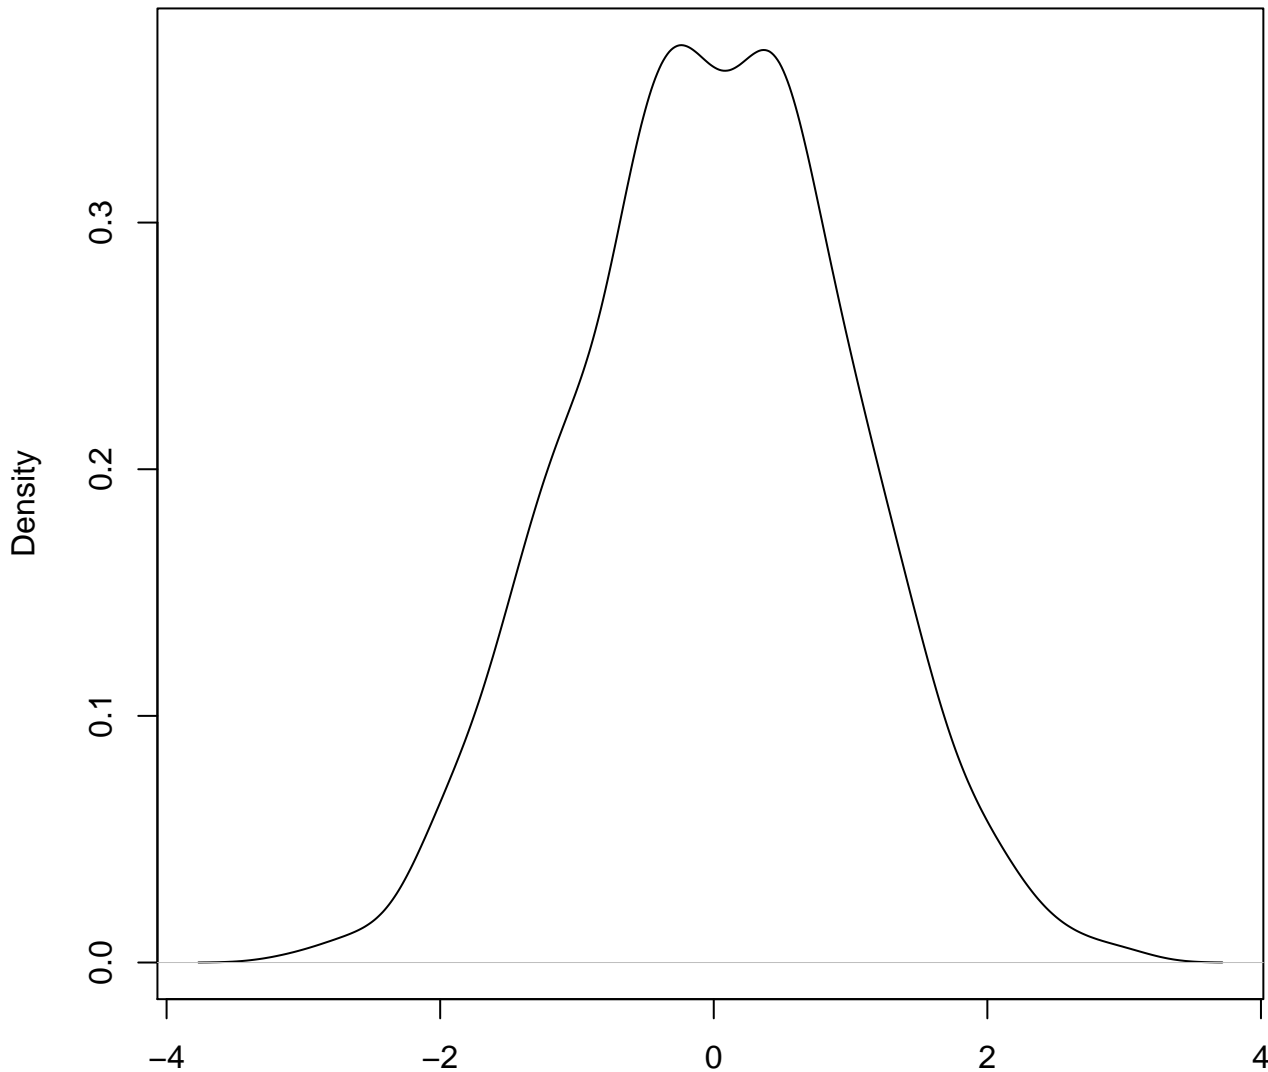

# Transformed MDGA1 distribution

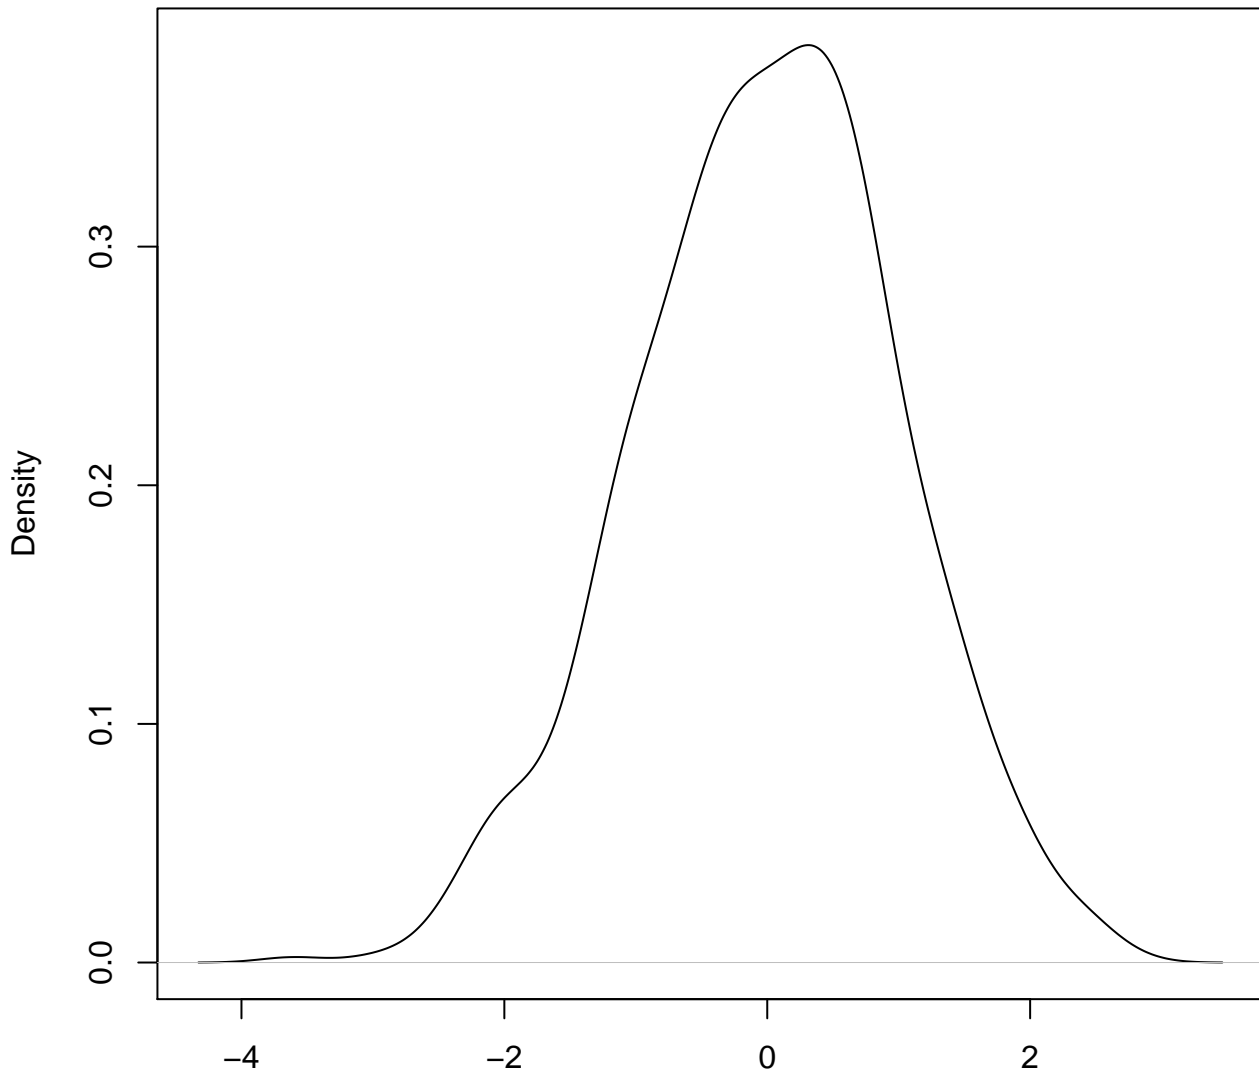

# Transformed IL-5R-alpha distribution

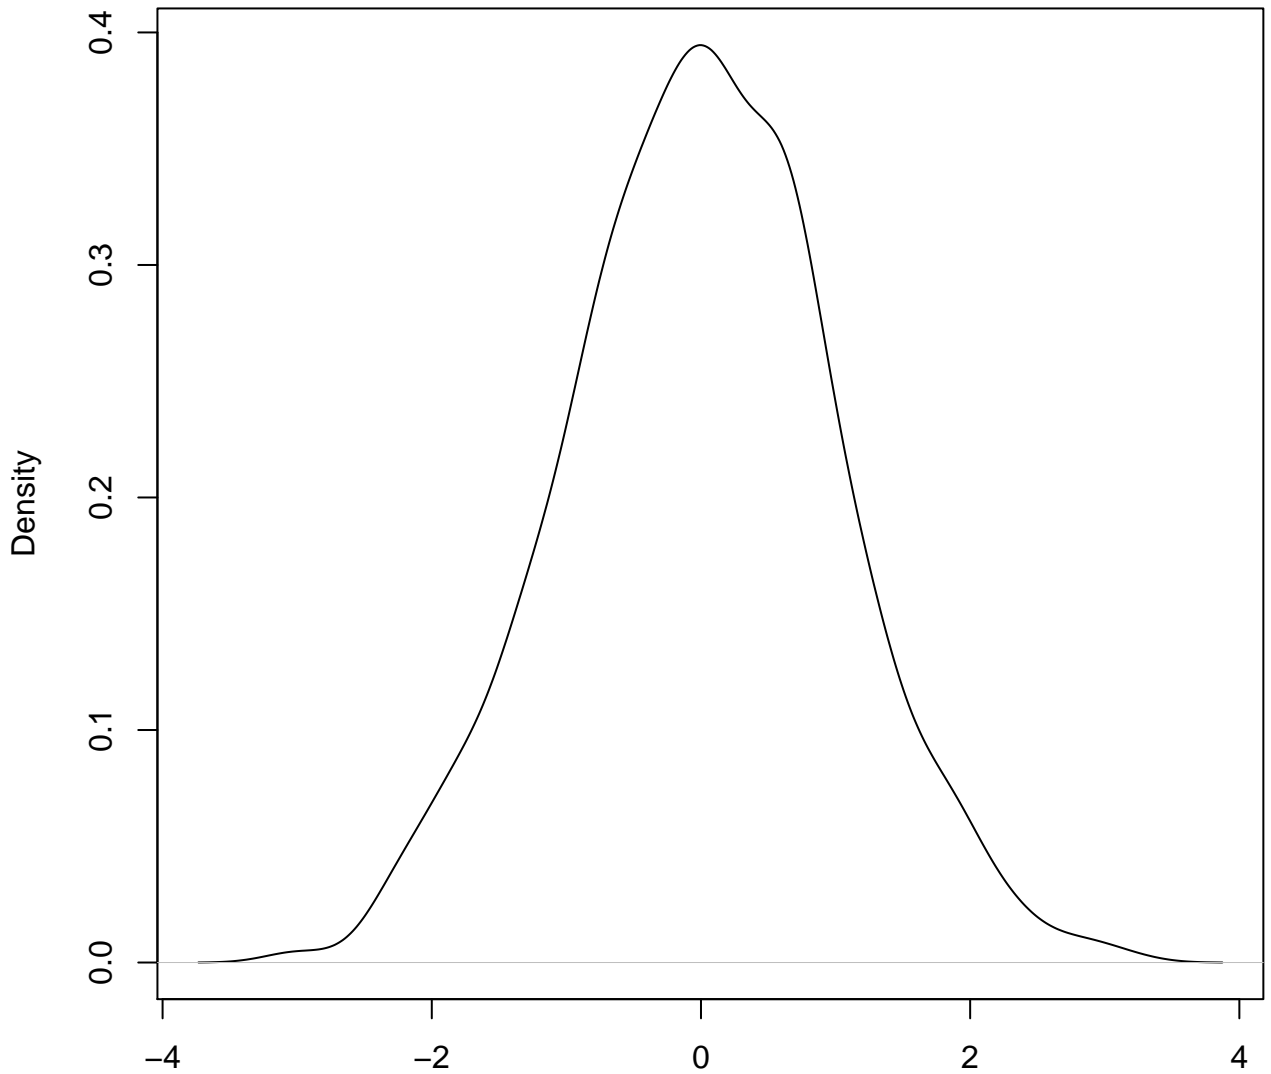

# Transformed PDGF-R-alpha distribution

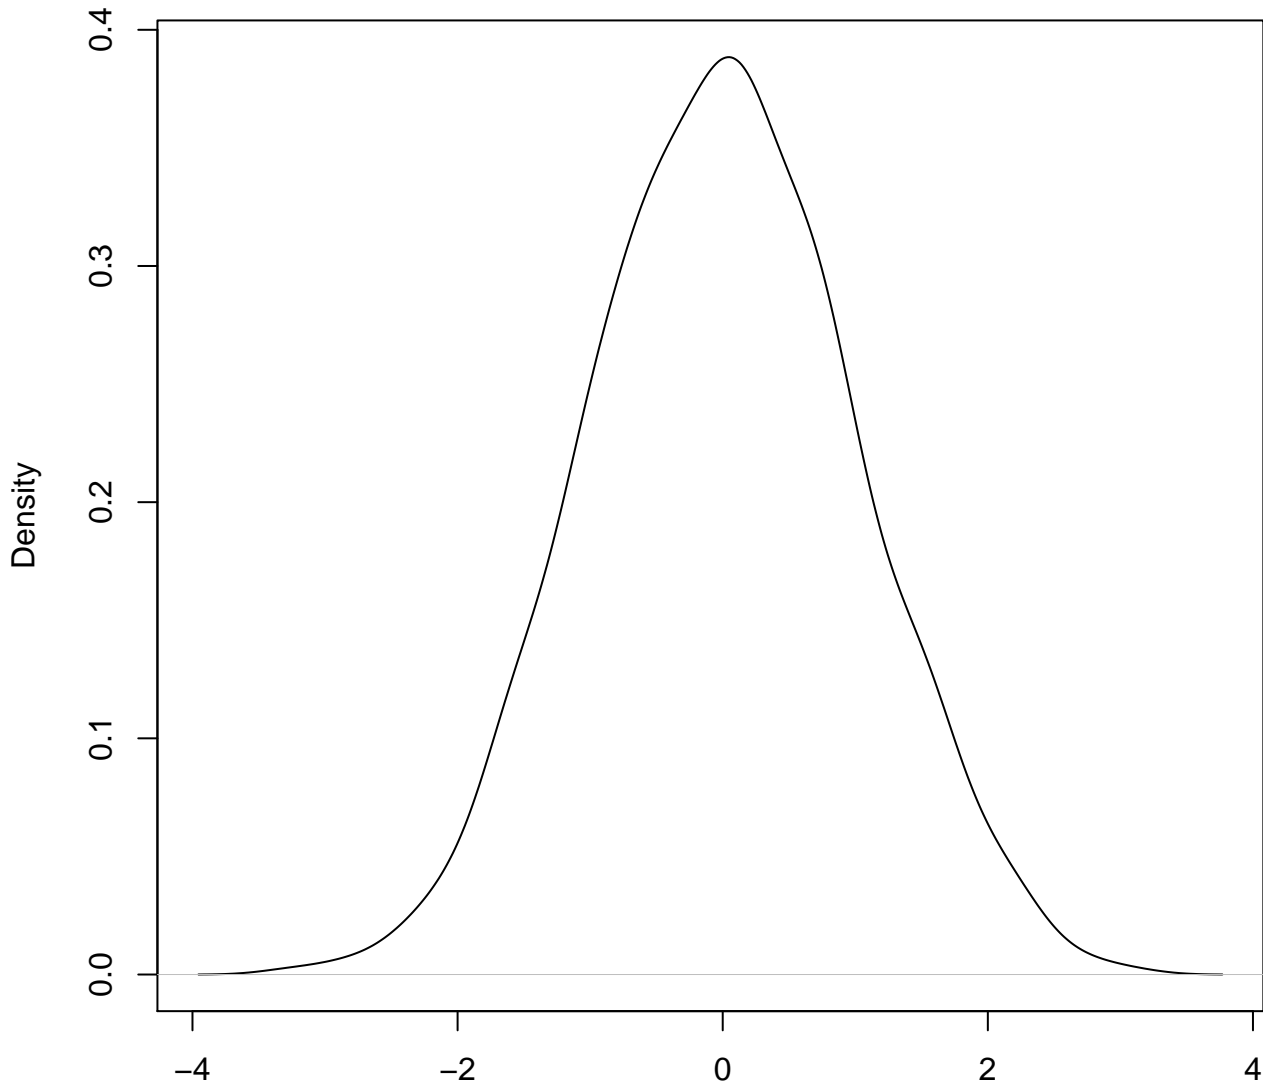

# Transformed CTSC distribution

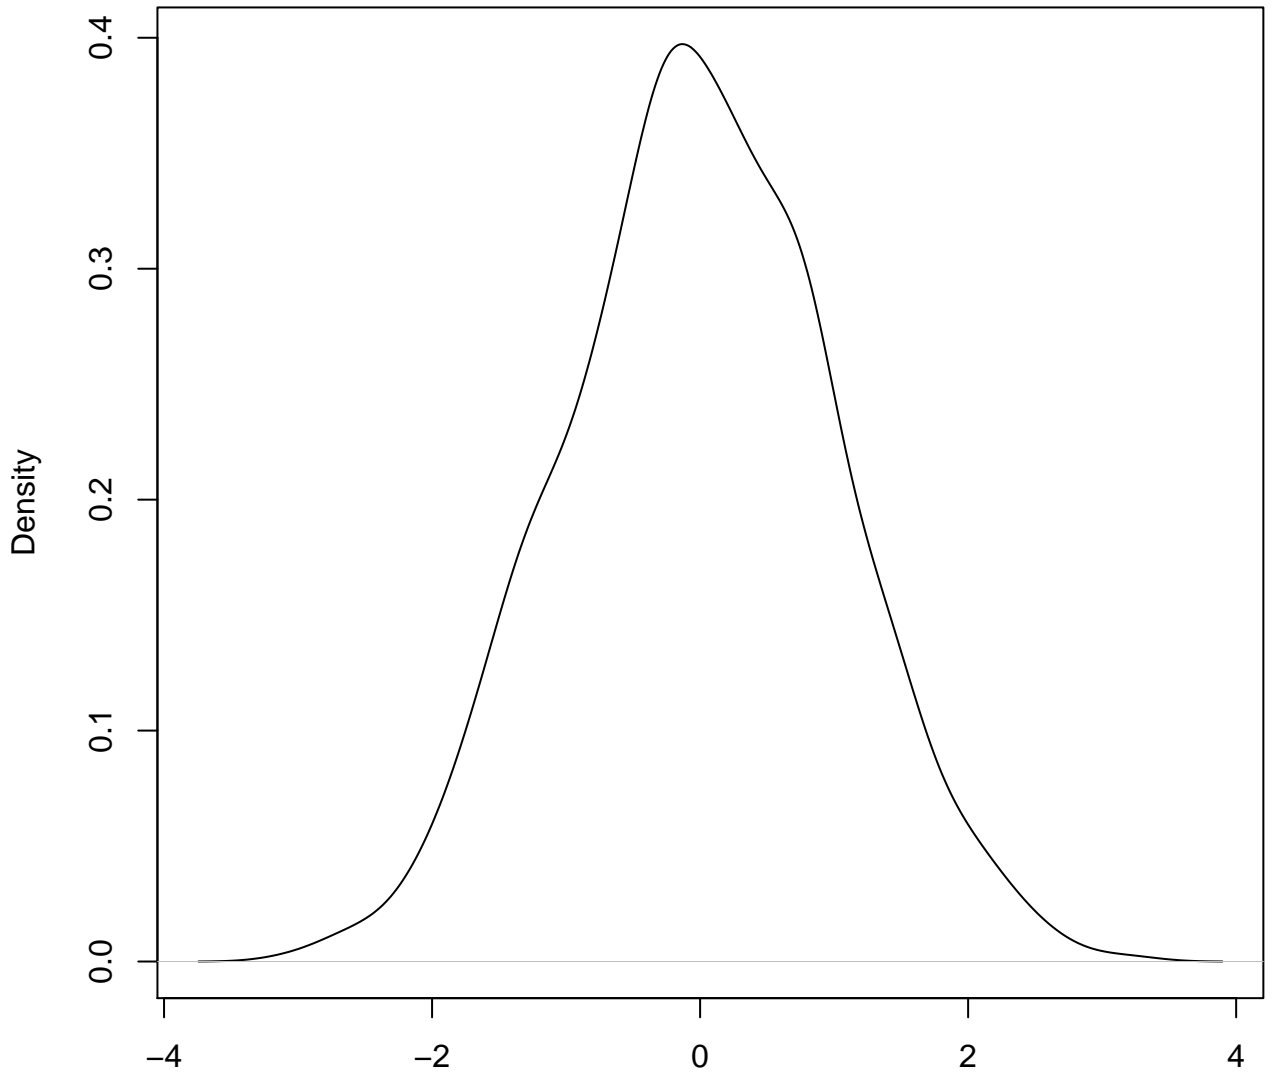

# Transformed CDH6 distribution

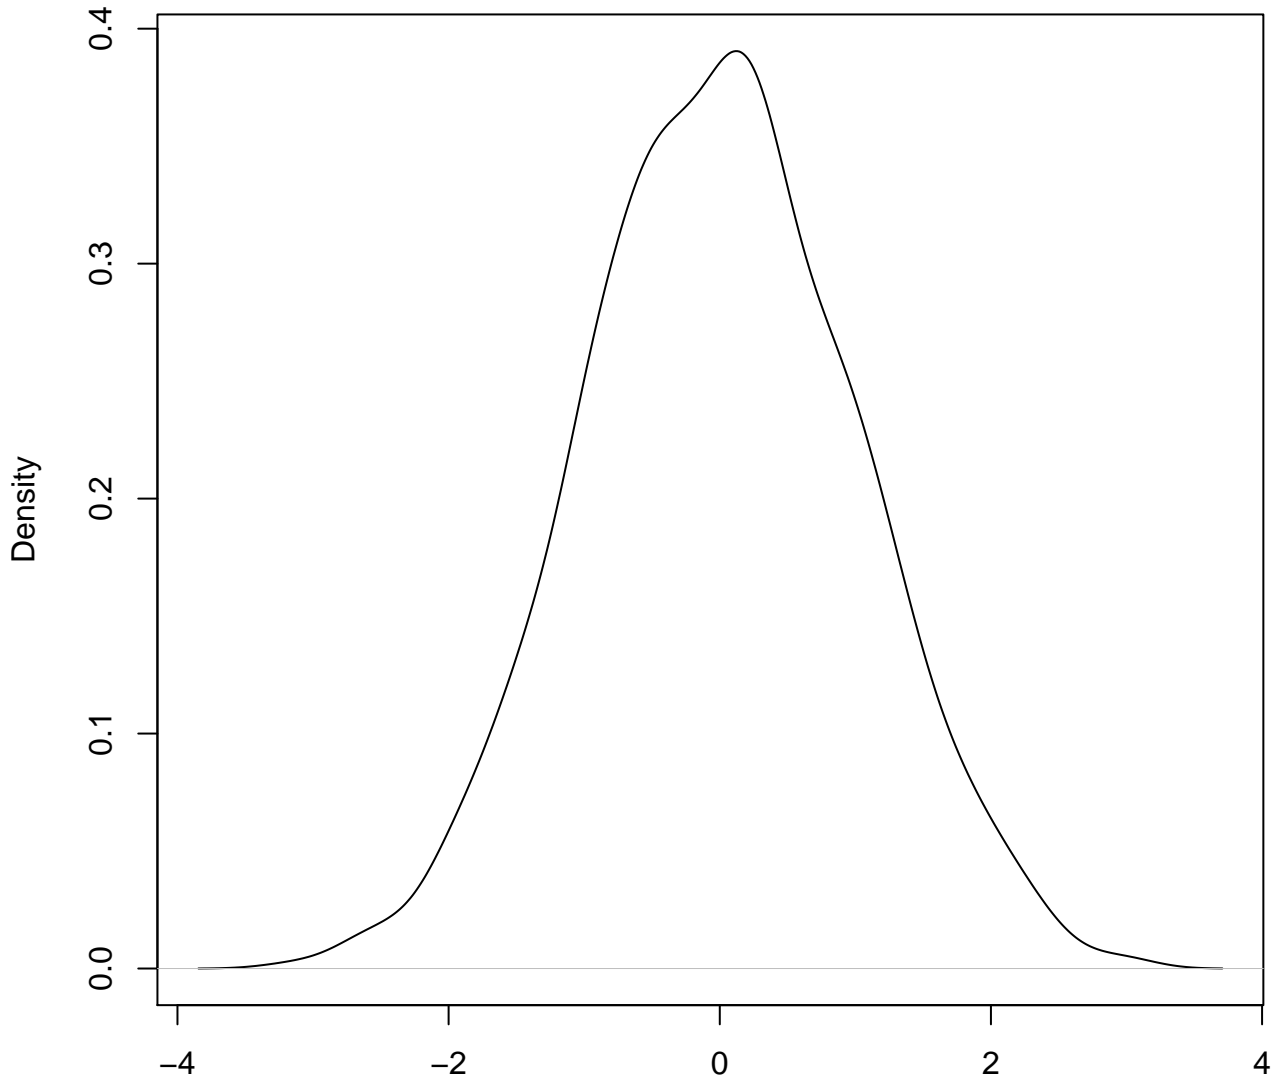

# Transformed DDR1 distribution

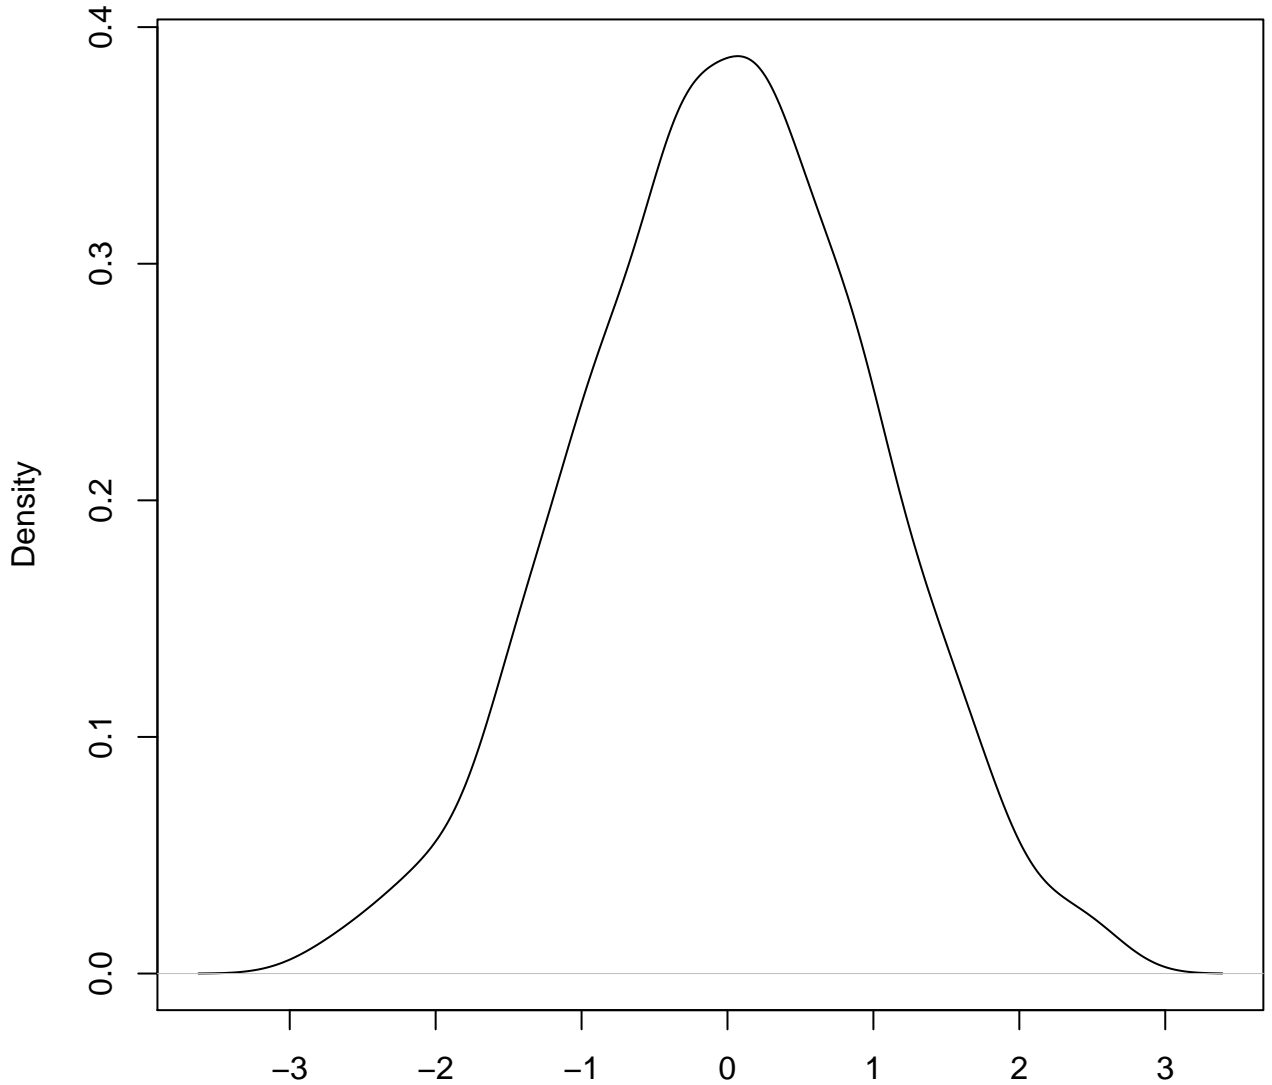



# Transformed JAM-B distribution

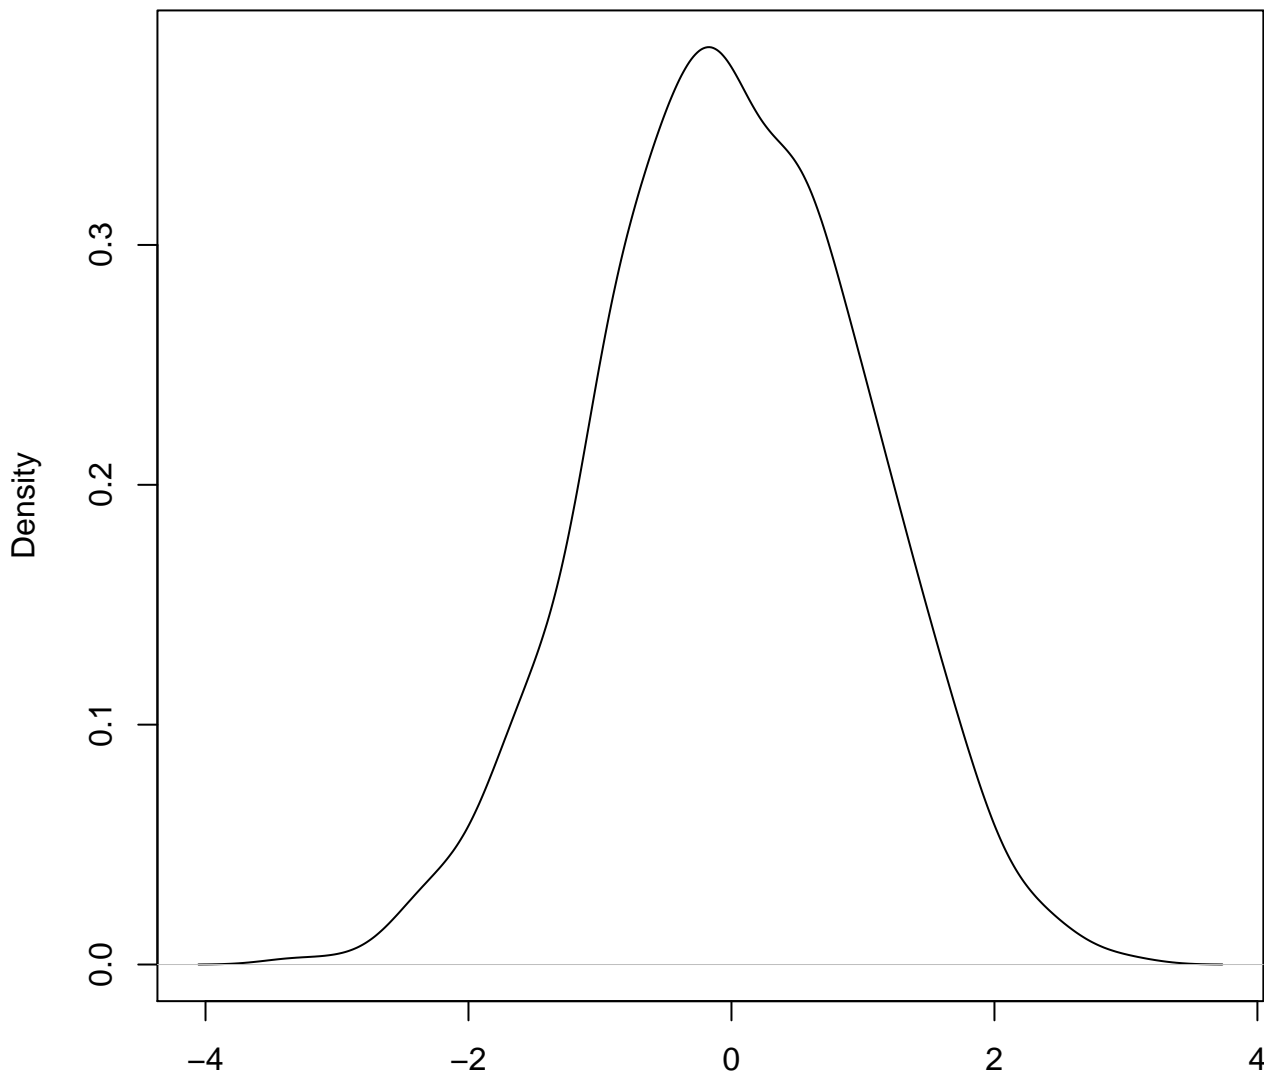

# Transformed CTSS distribution

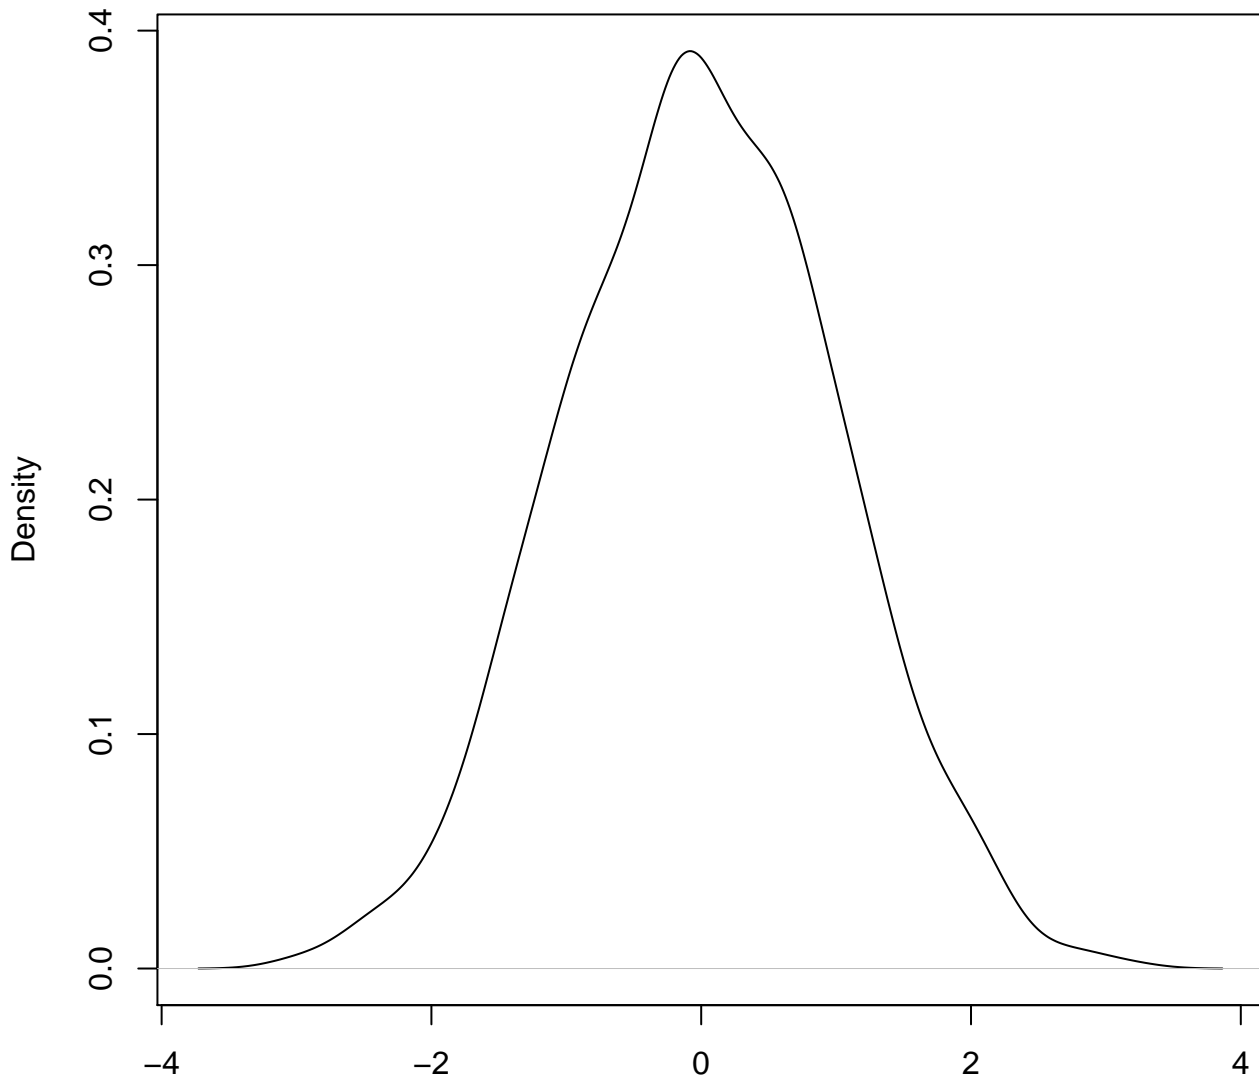

# Transformed N-CDase distribution

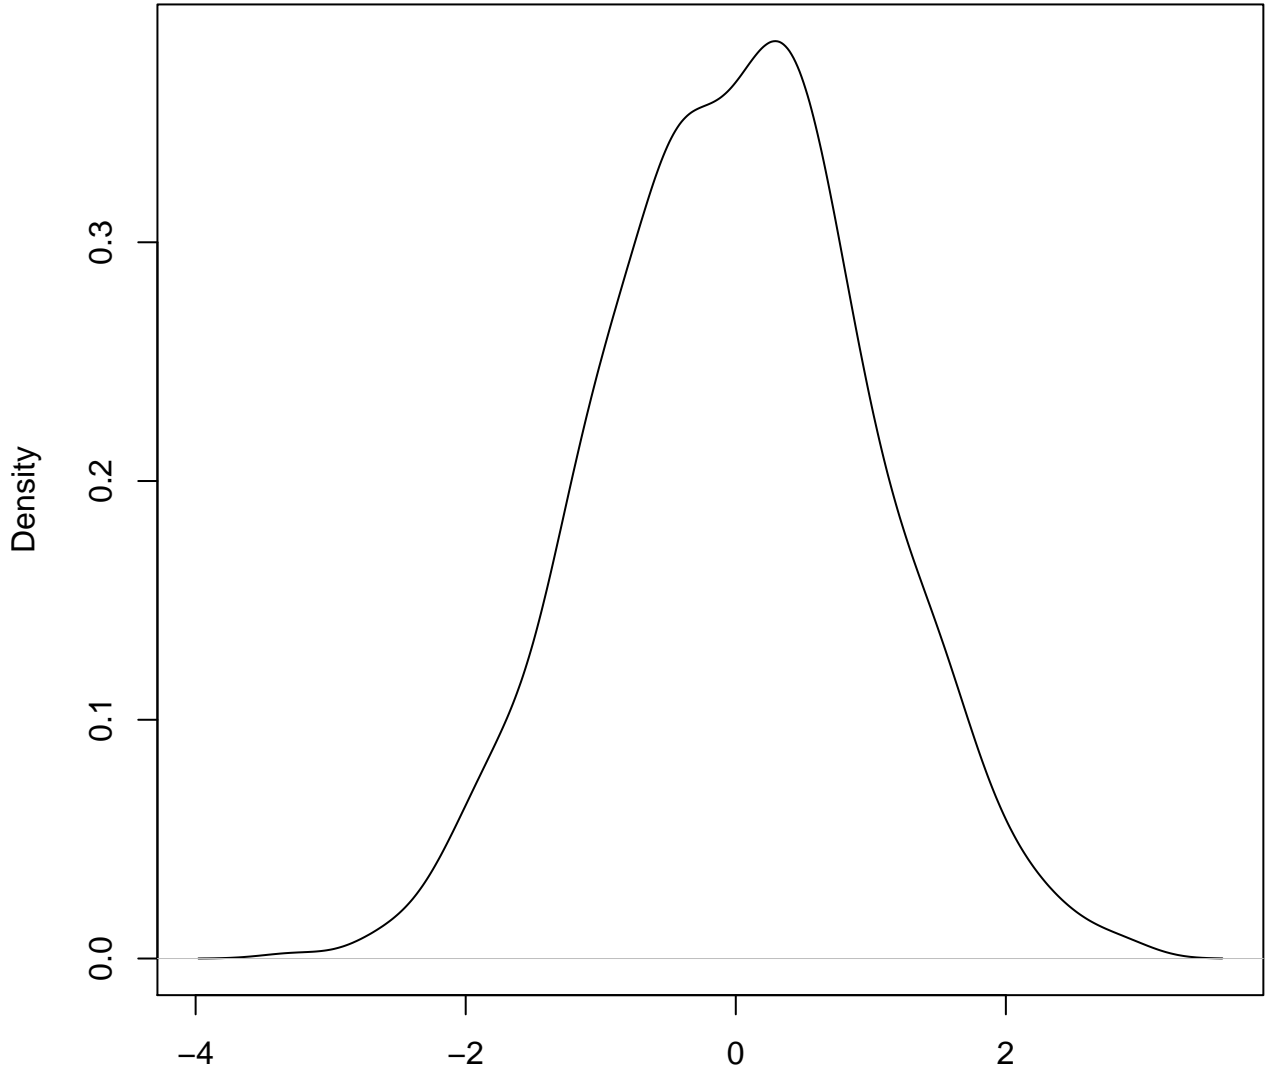

# Transformed NAAA distribution

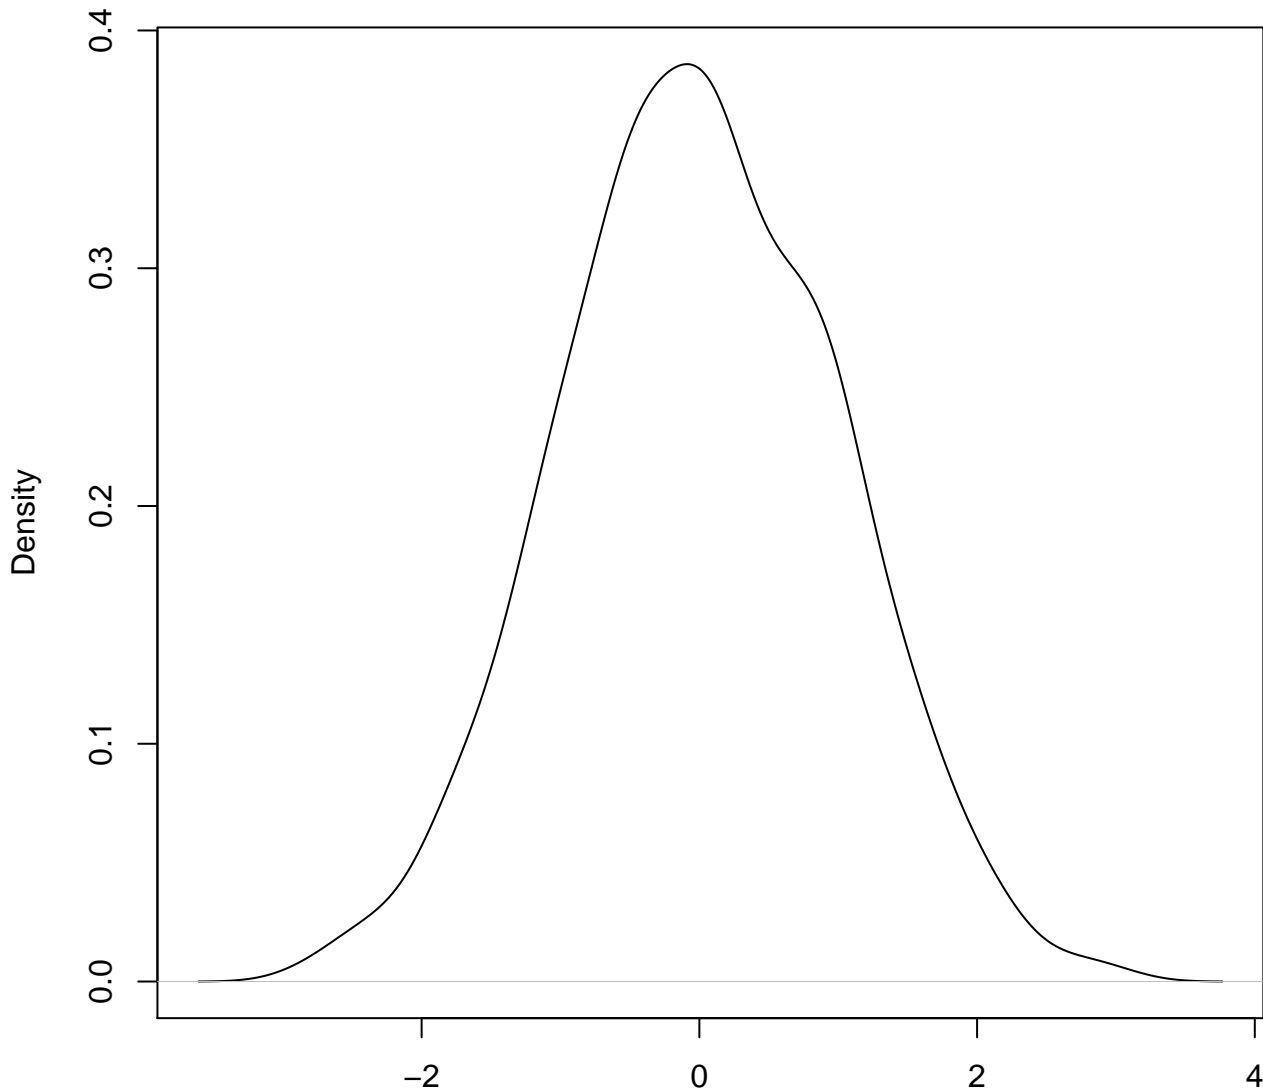

# Transformed N2DL-2 distribution

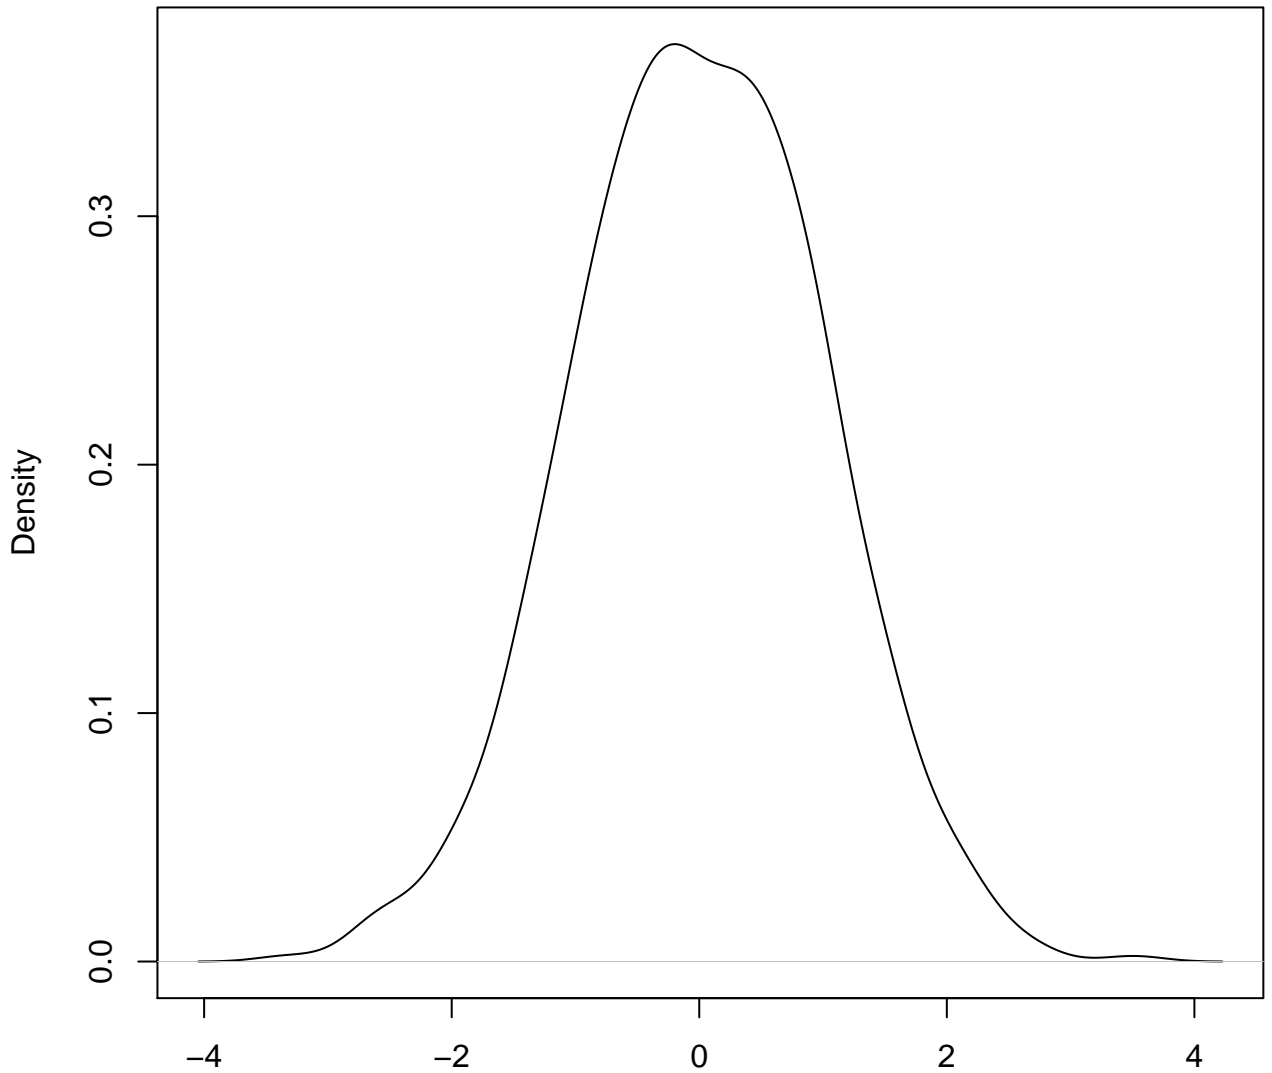

# Transformed PLXNB1 distribution

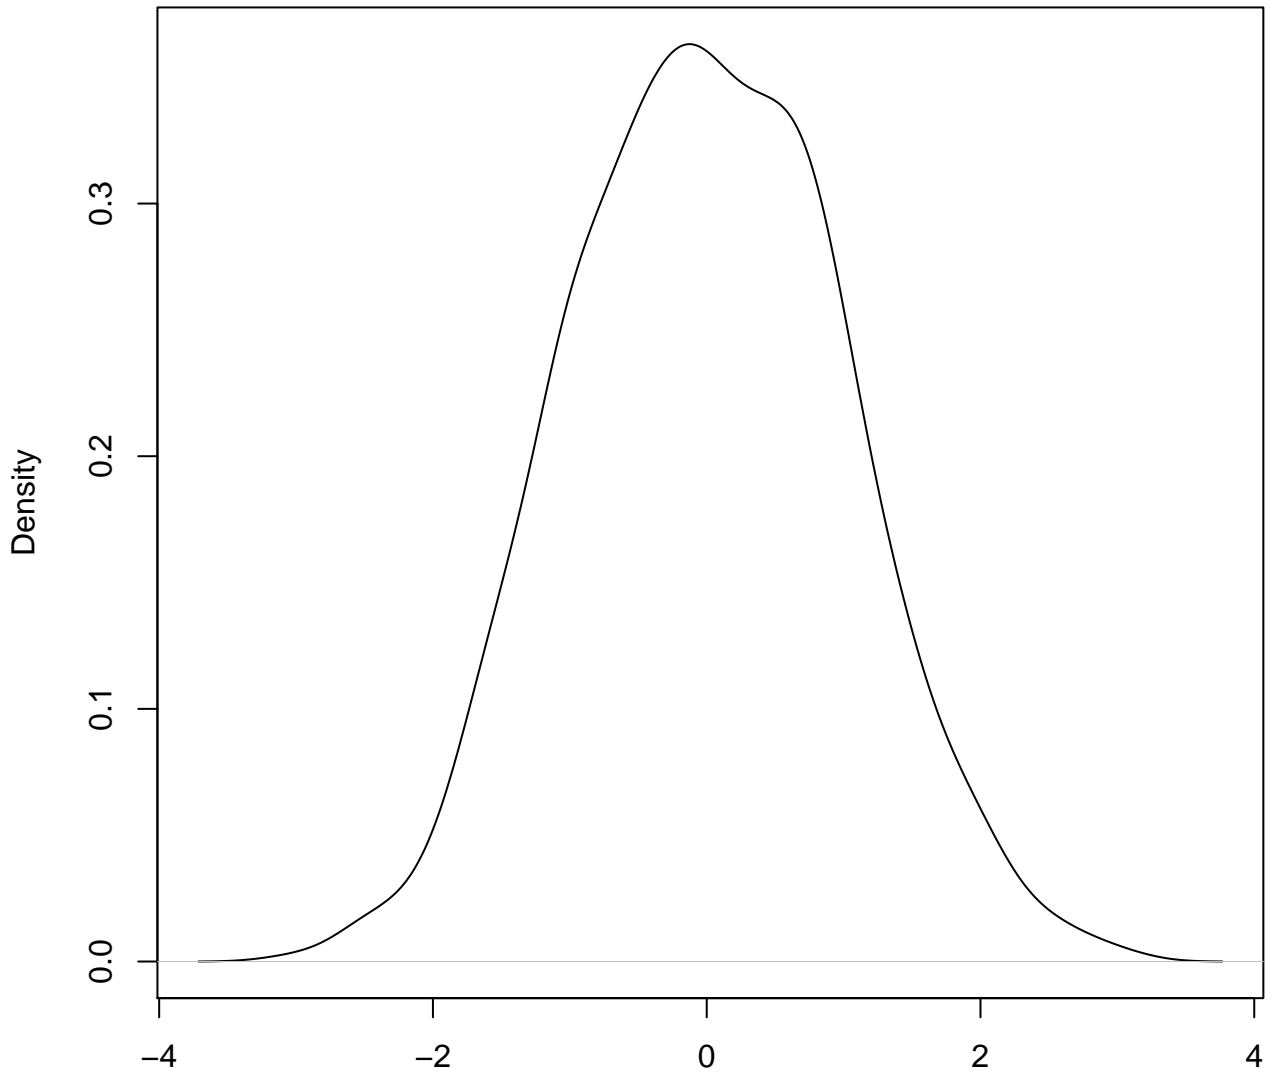

# Transformed TNFRSF21 distribution

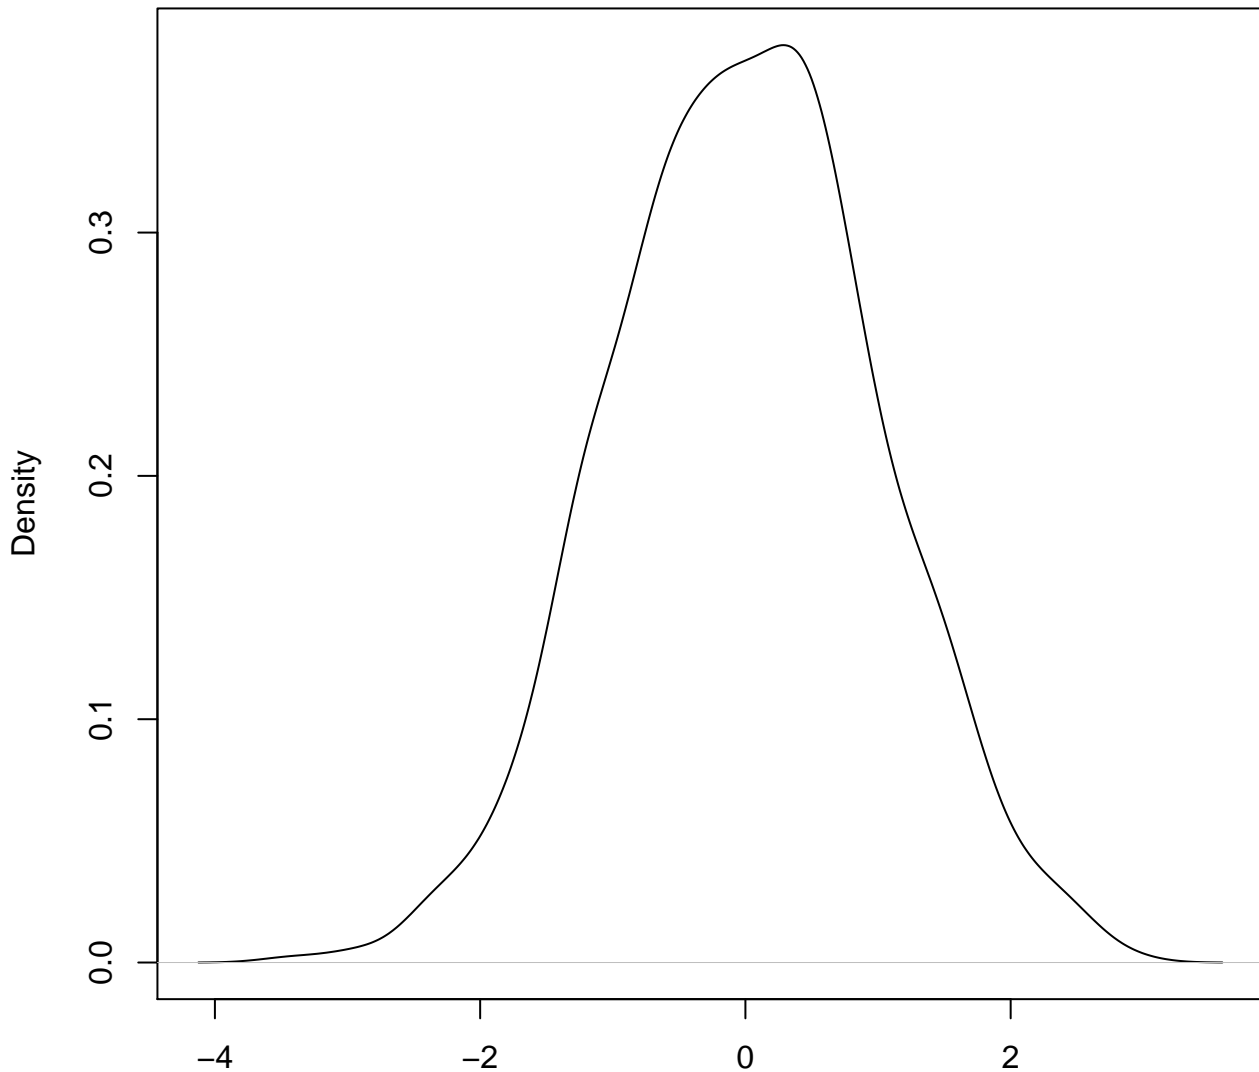

# Transformed CLM-1 distribution

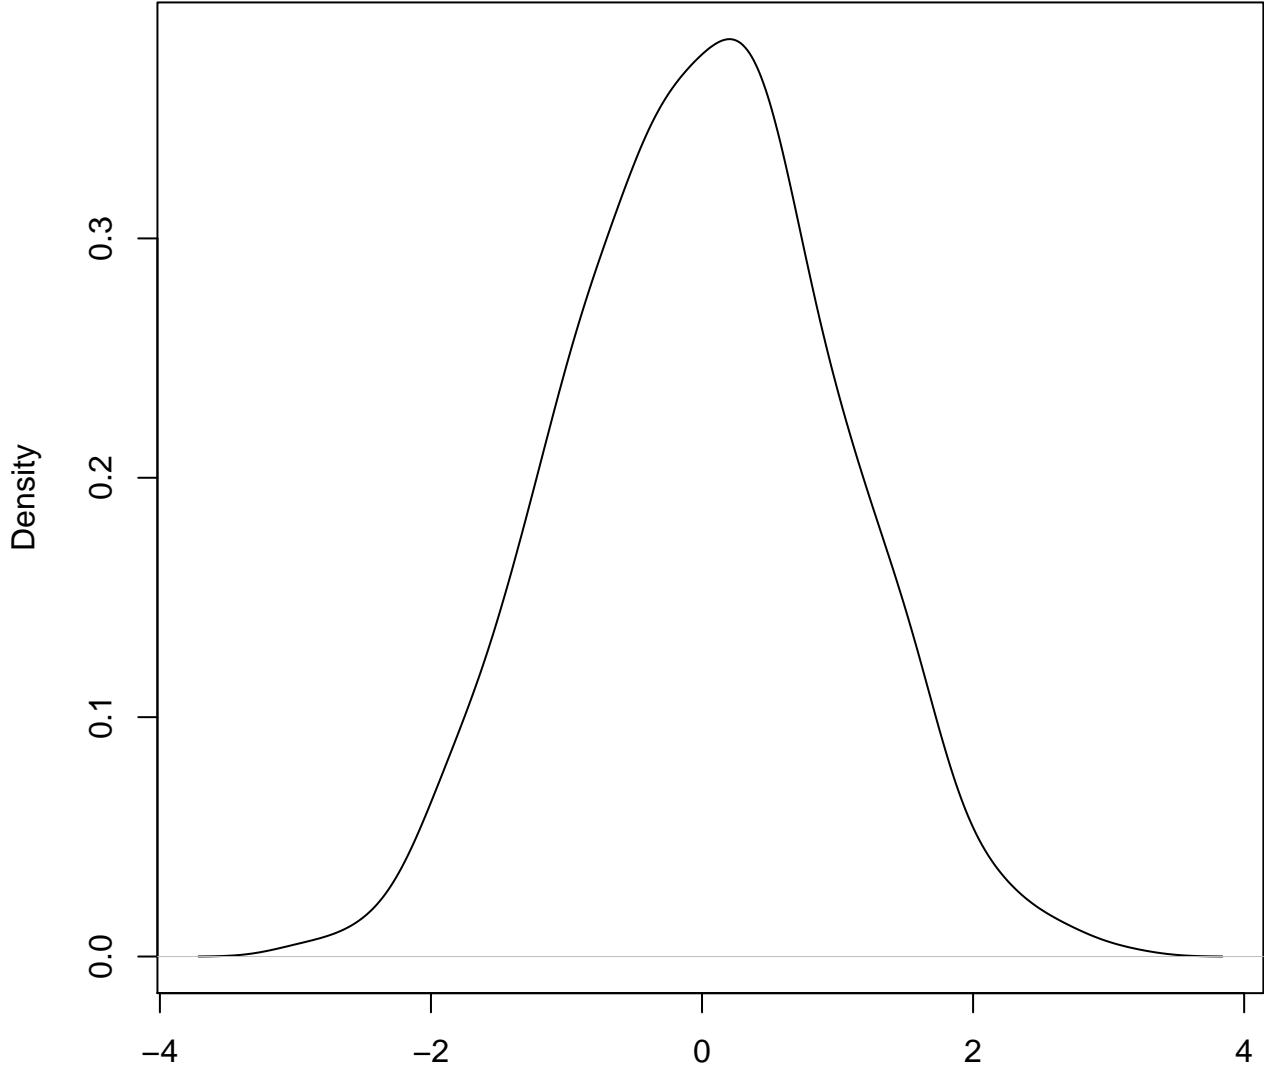



# Transformed SPOCK1 distribution

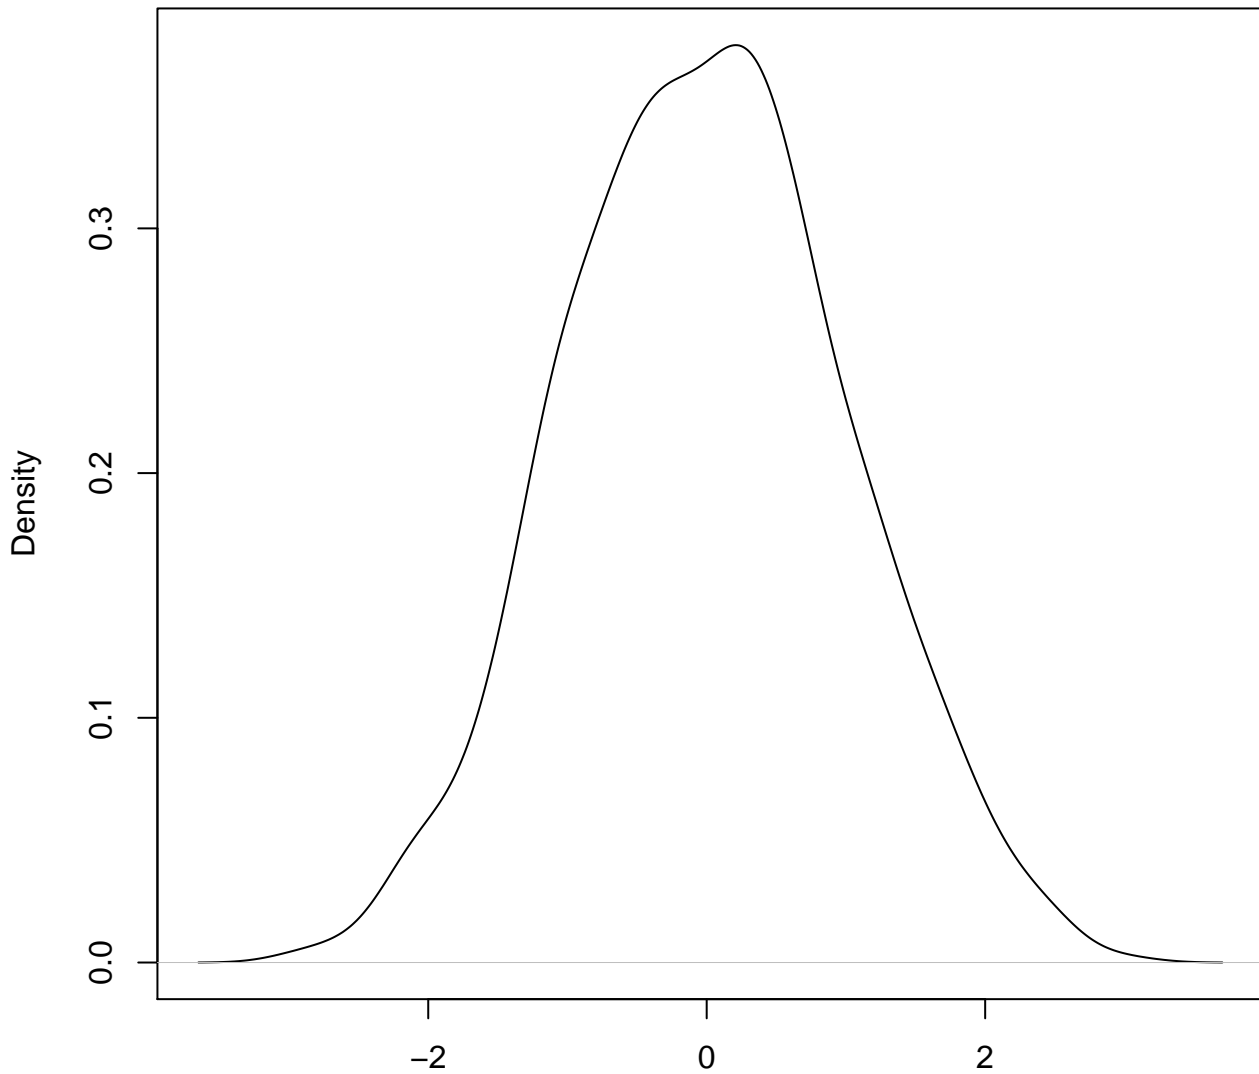

**Transformed IL12 distribution**

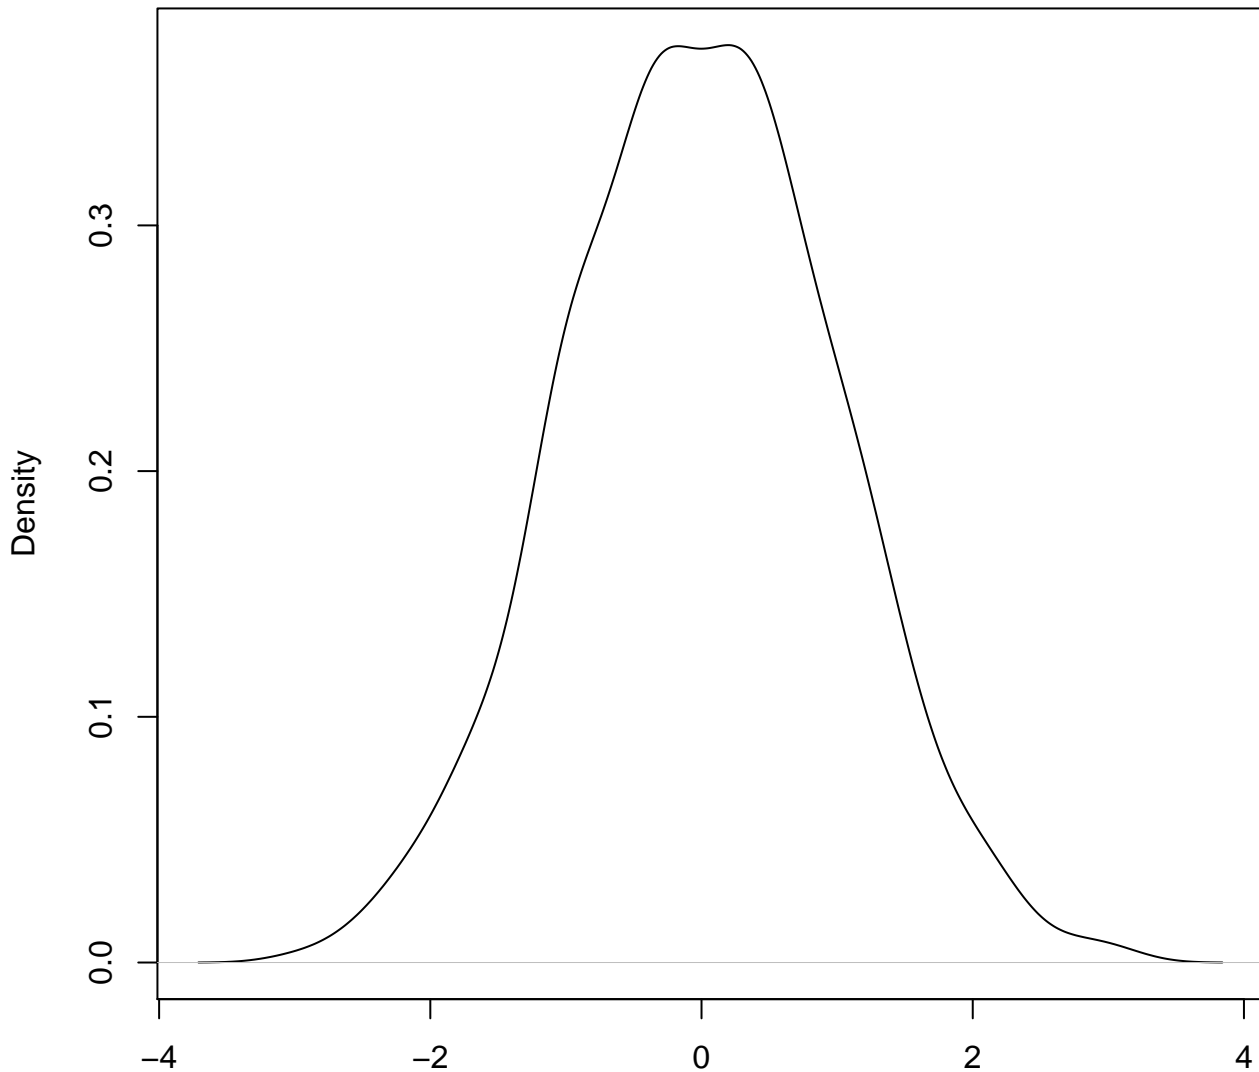

# Transformed Dkk-4 distribution

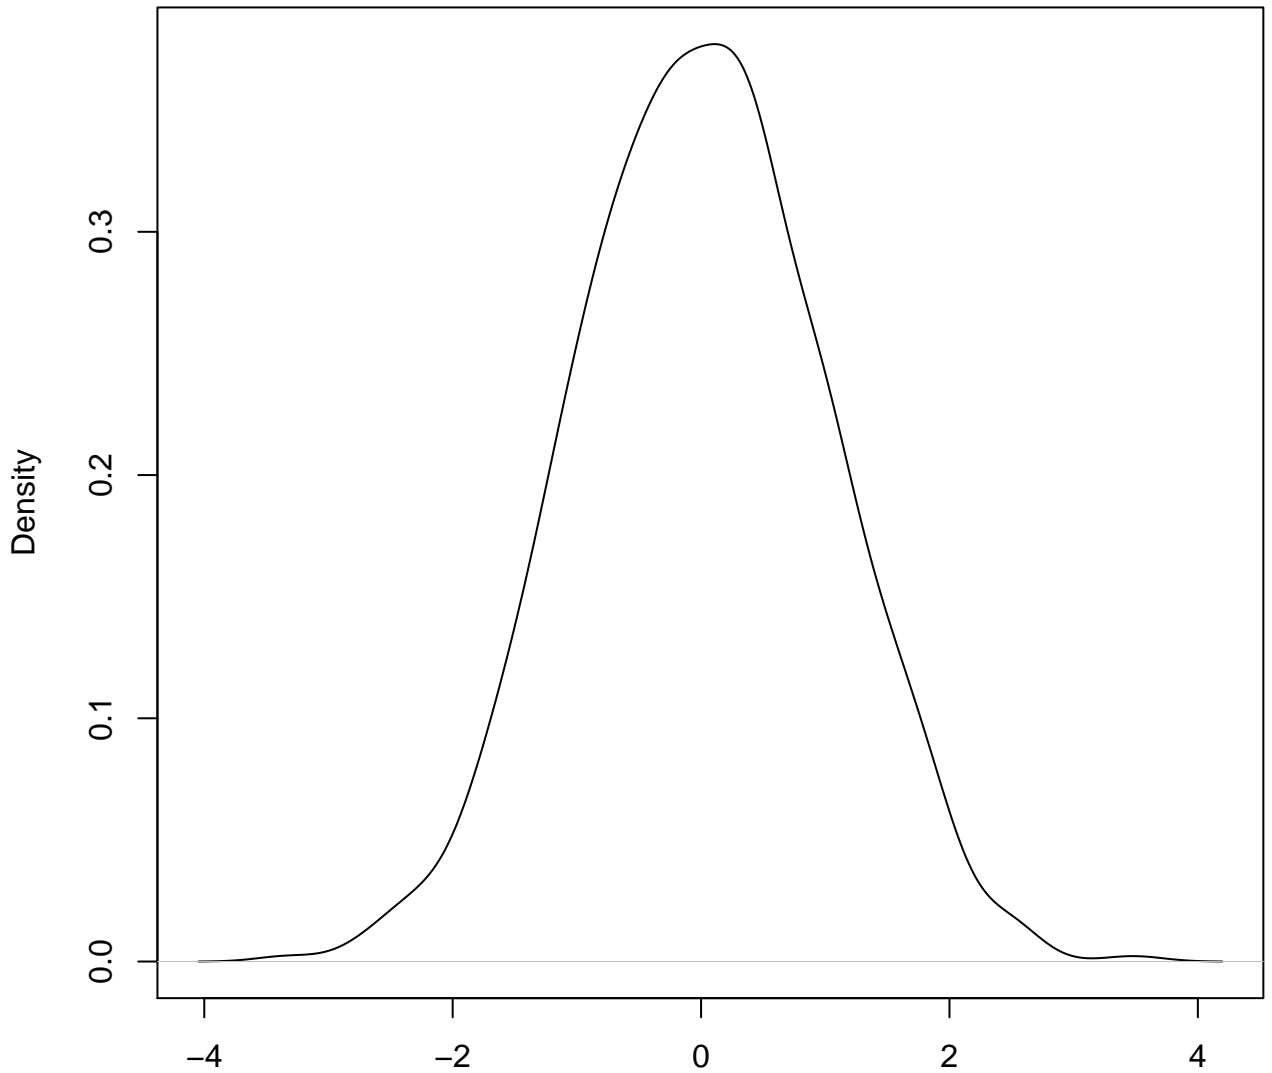

**Transformed EDA2R distribution**

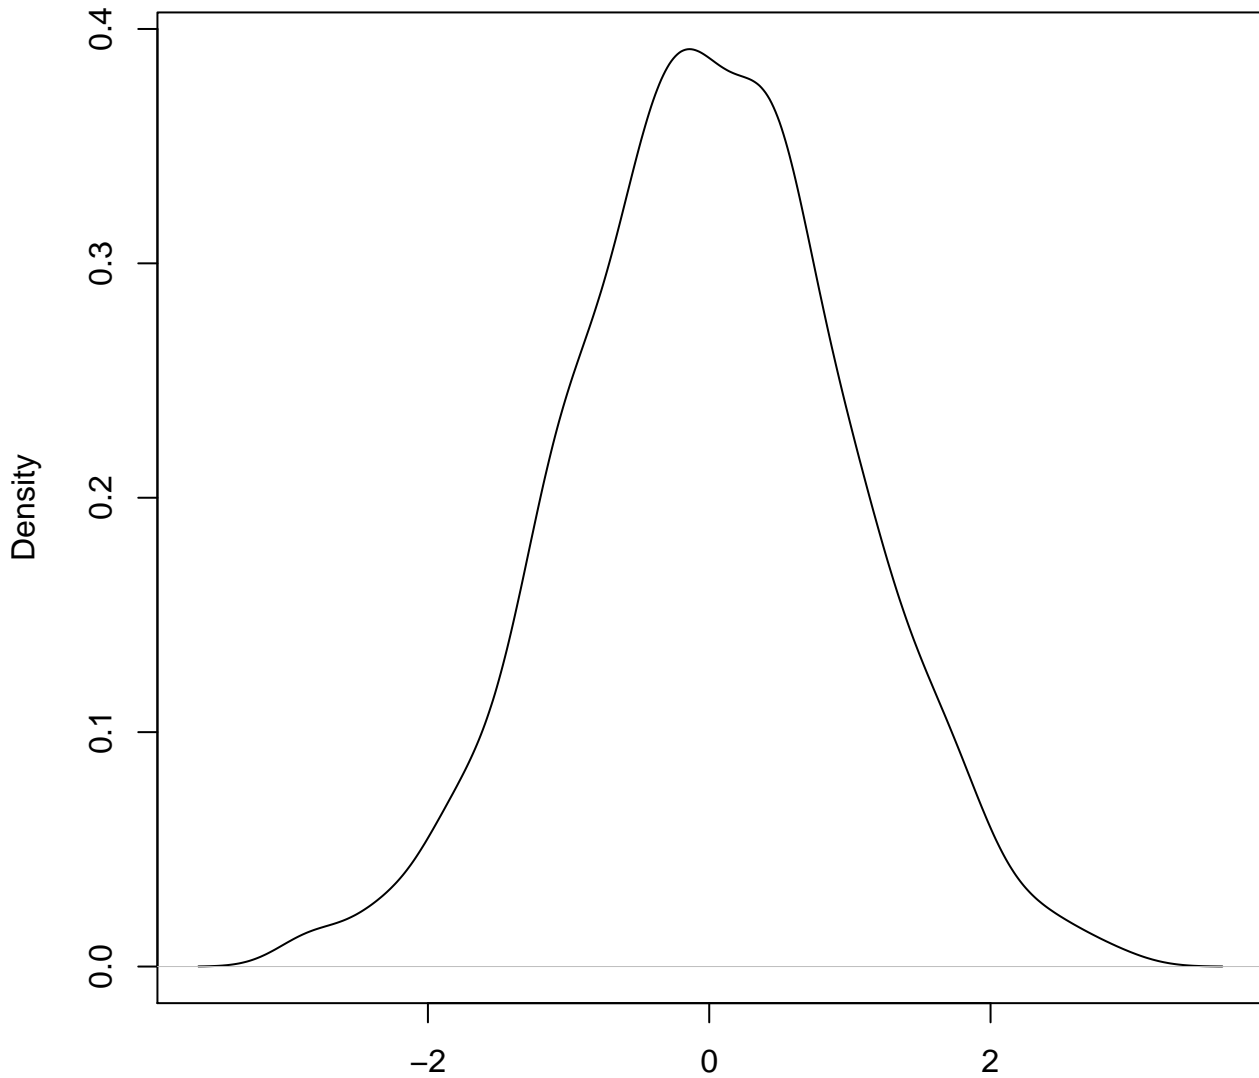

# Transformed LAT distribution

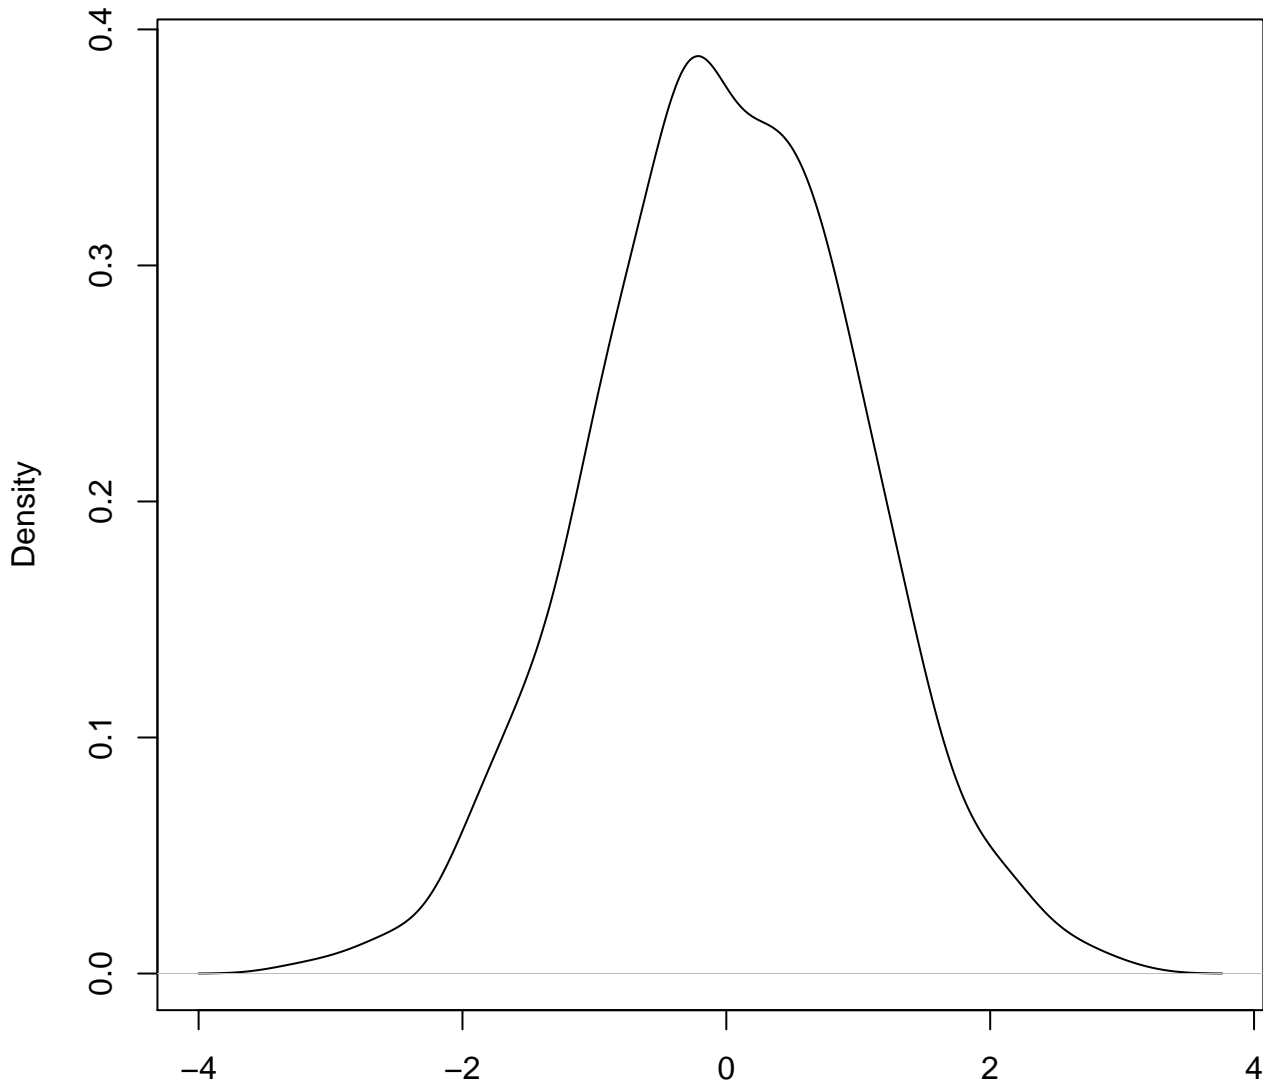

# Transformed NTRK3 distribution

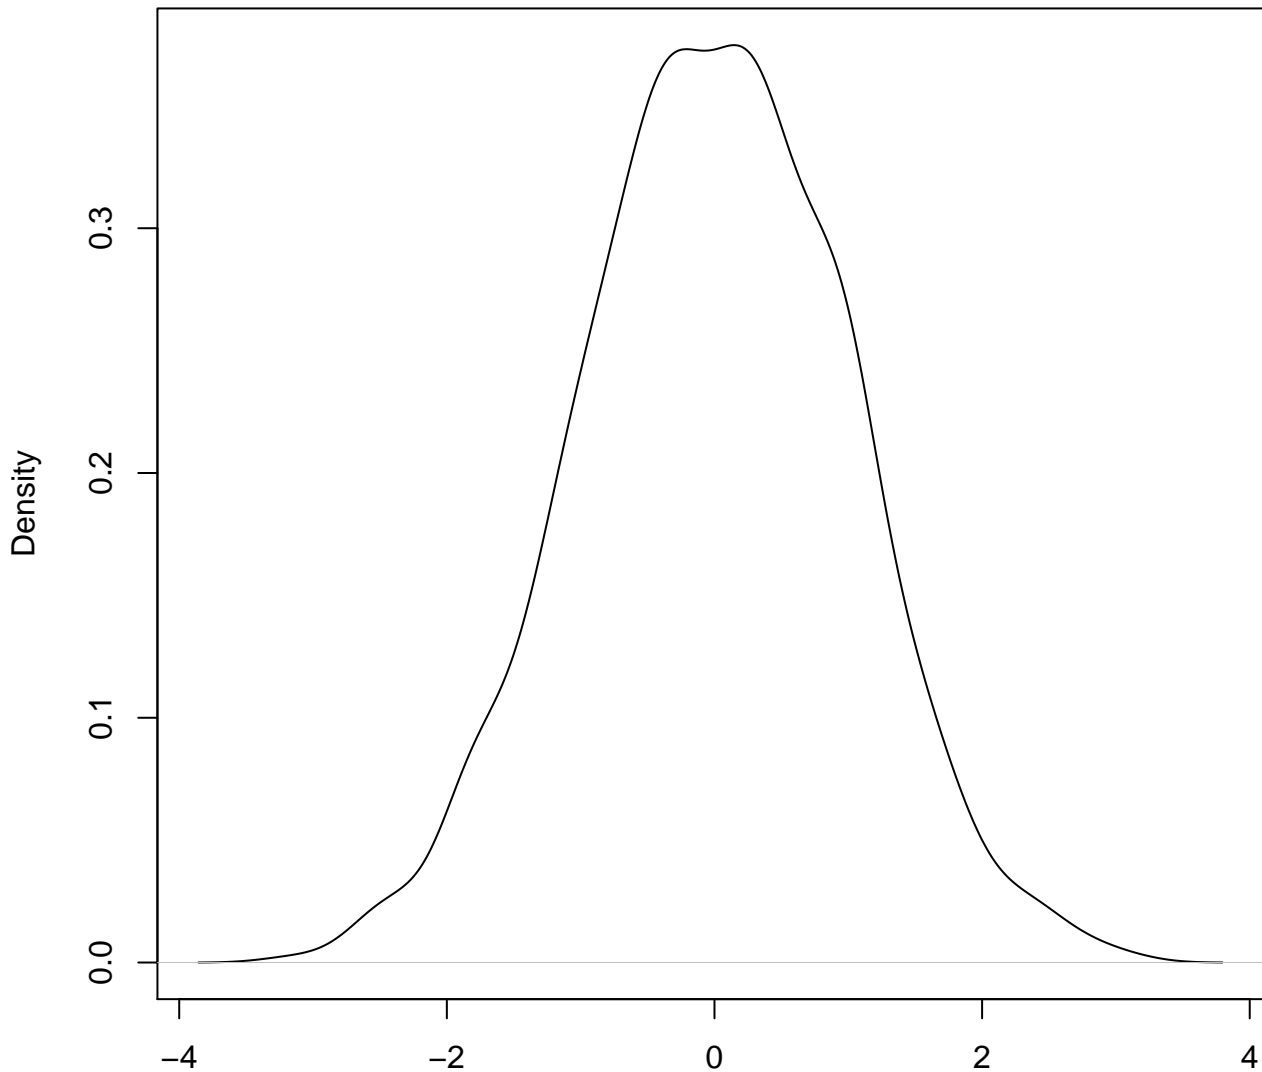

# Transformed LAIR-2 distribution

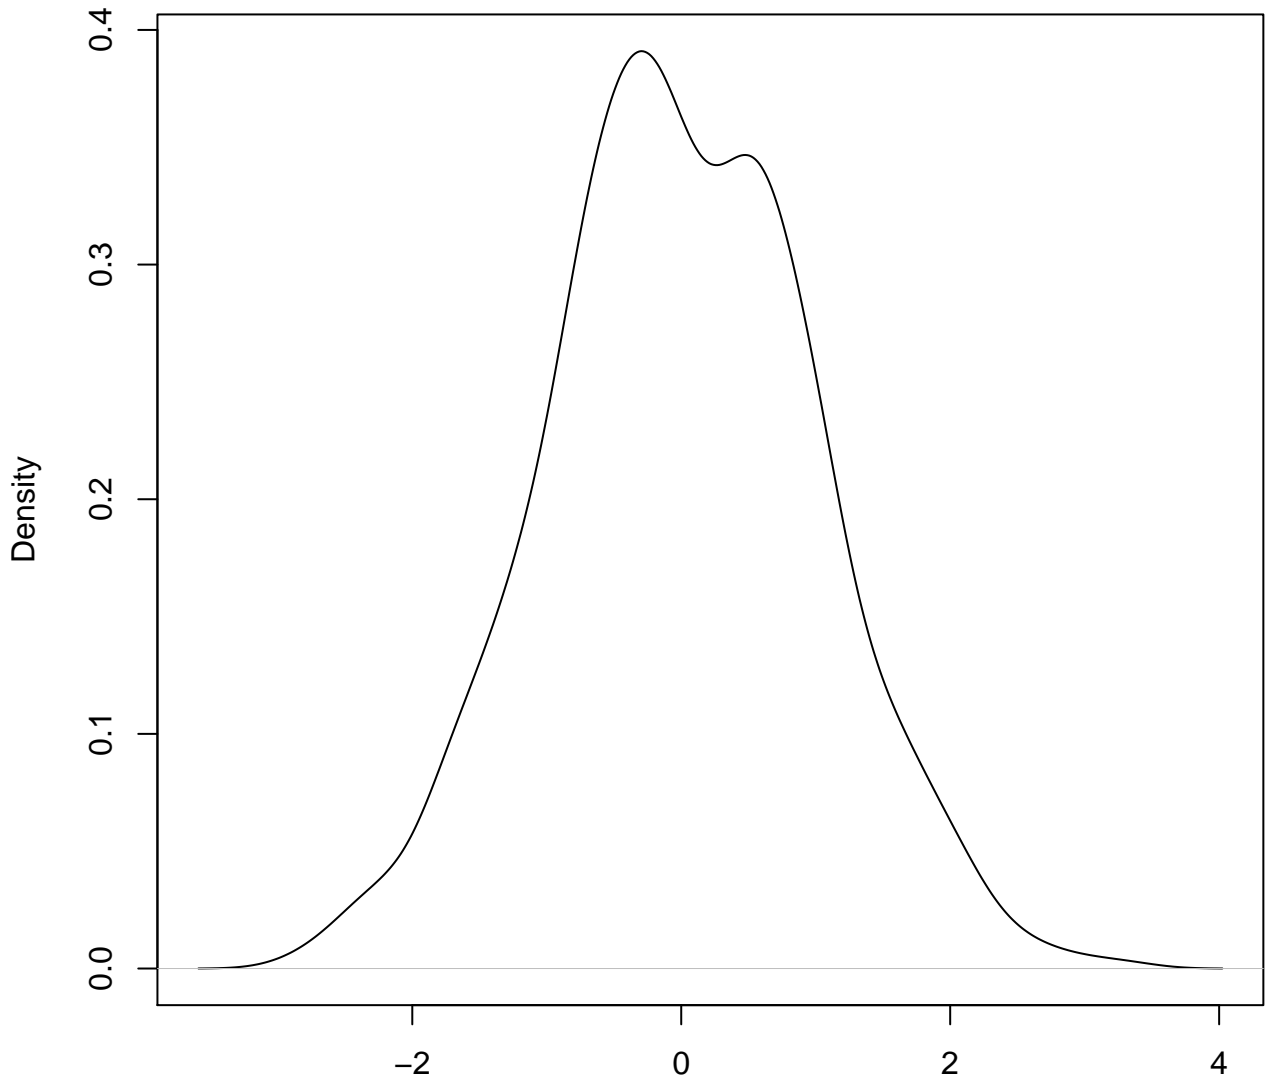

# Transformed MANF distribution

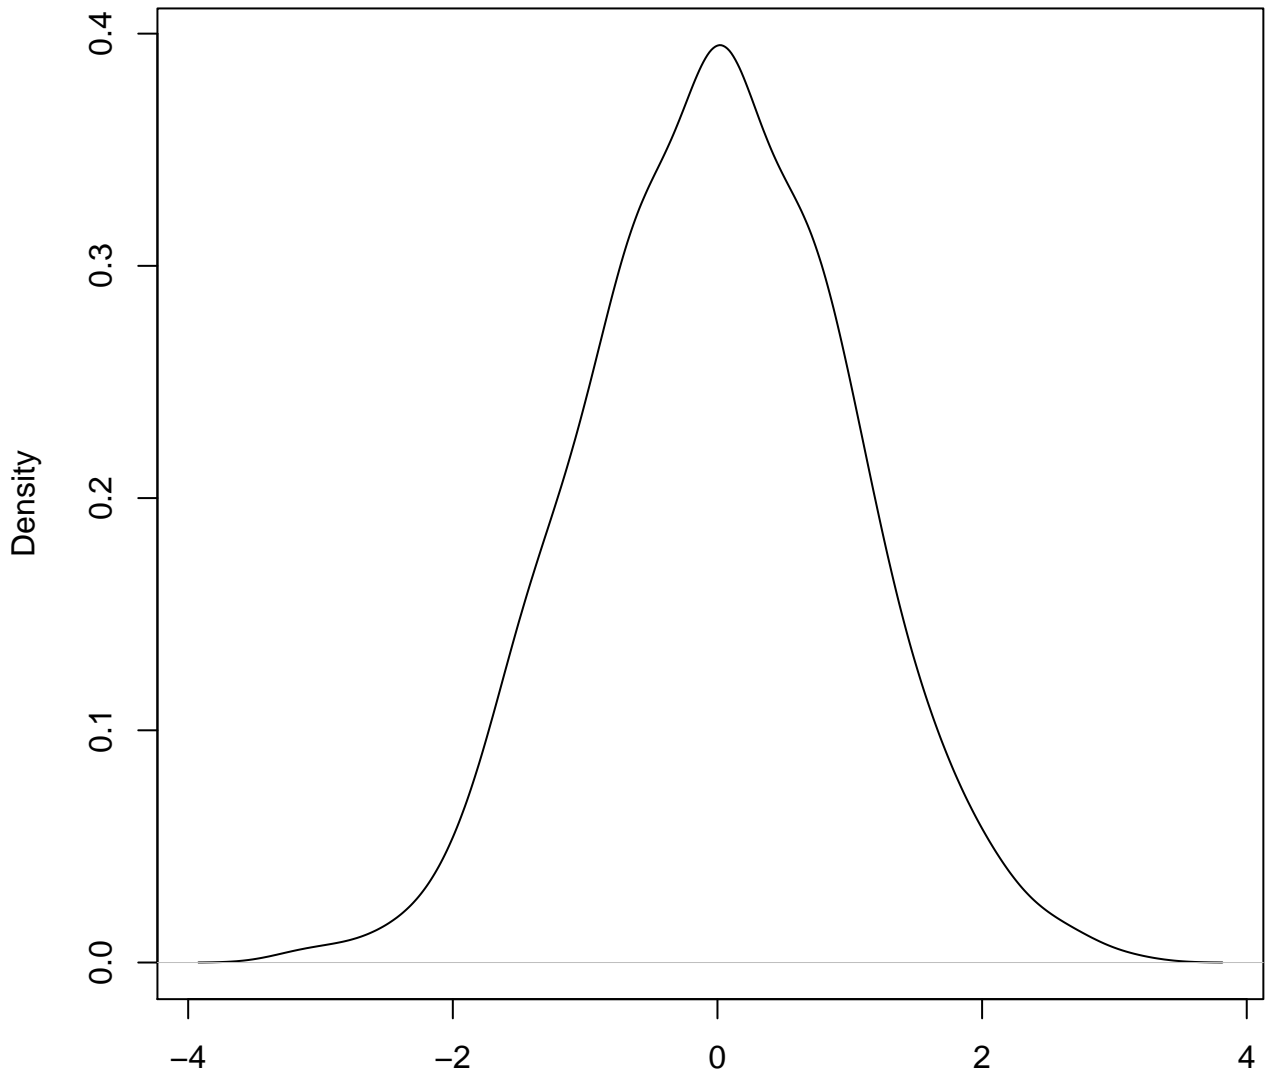



# Transformed TN-R distribution

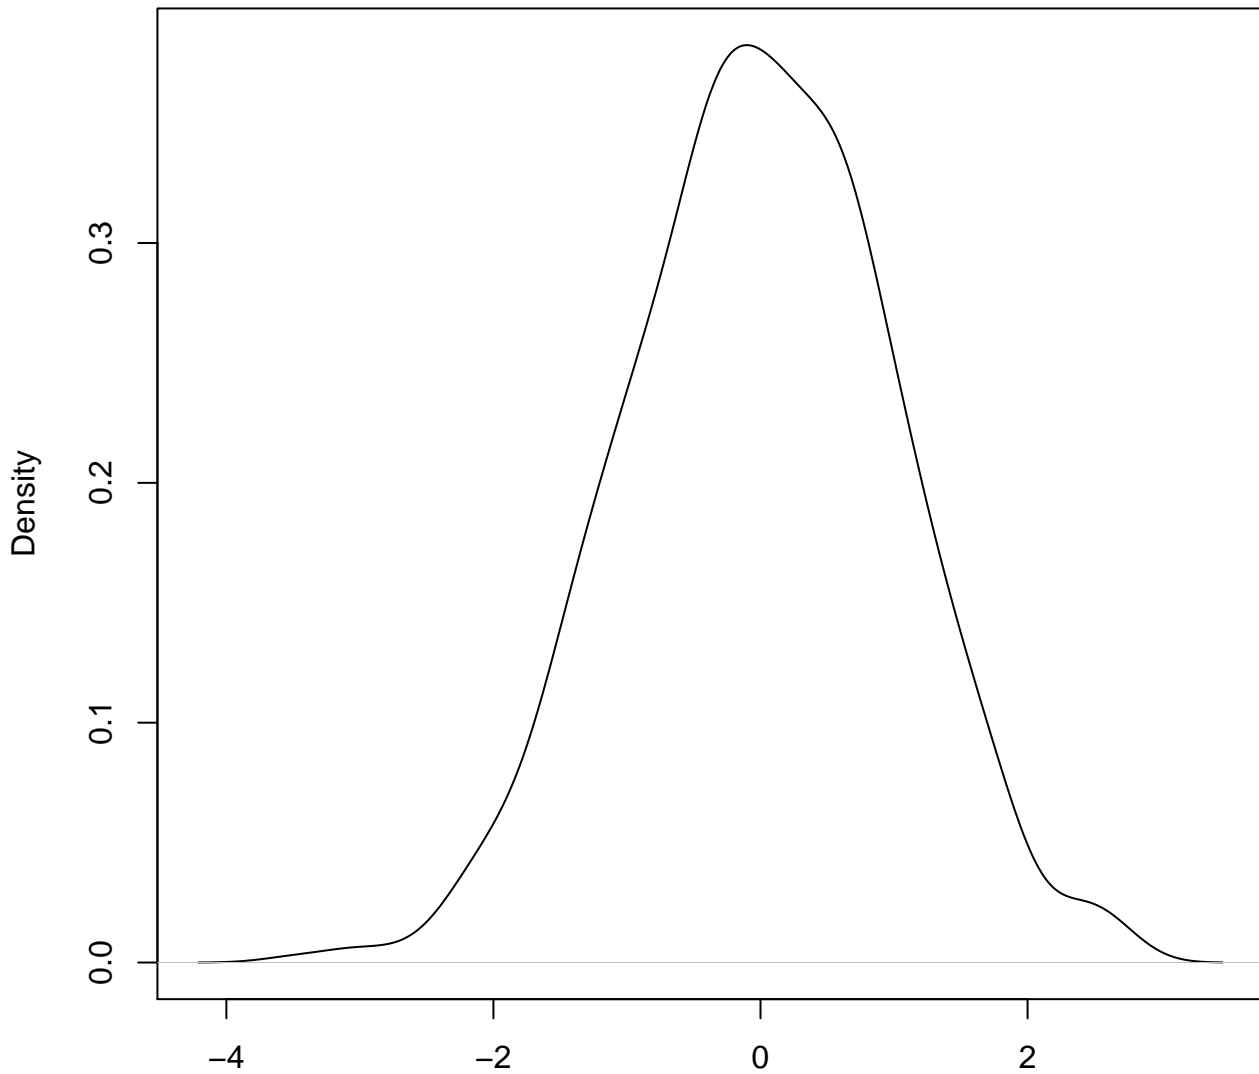

# Transformed CD200R1 distribution

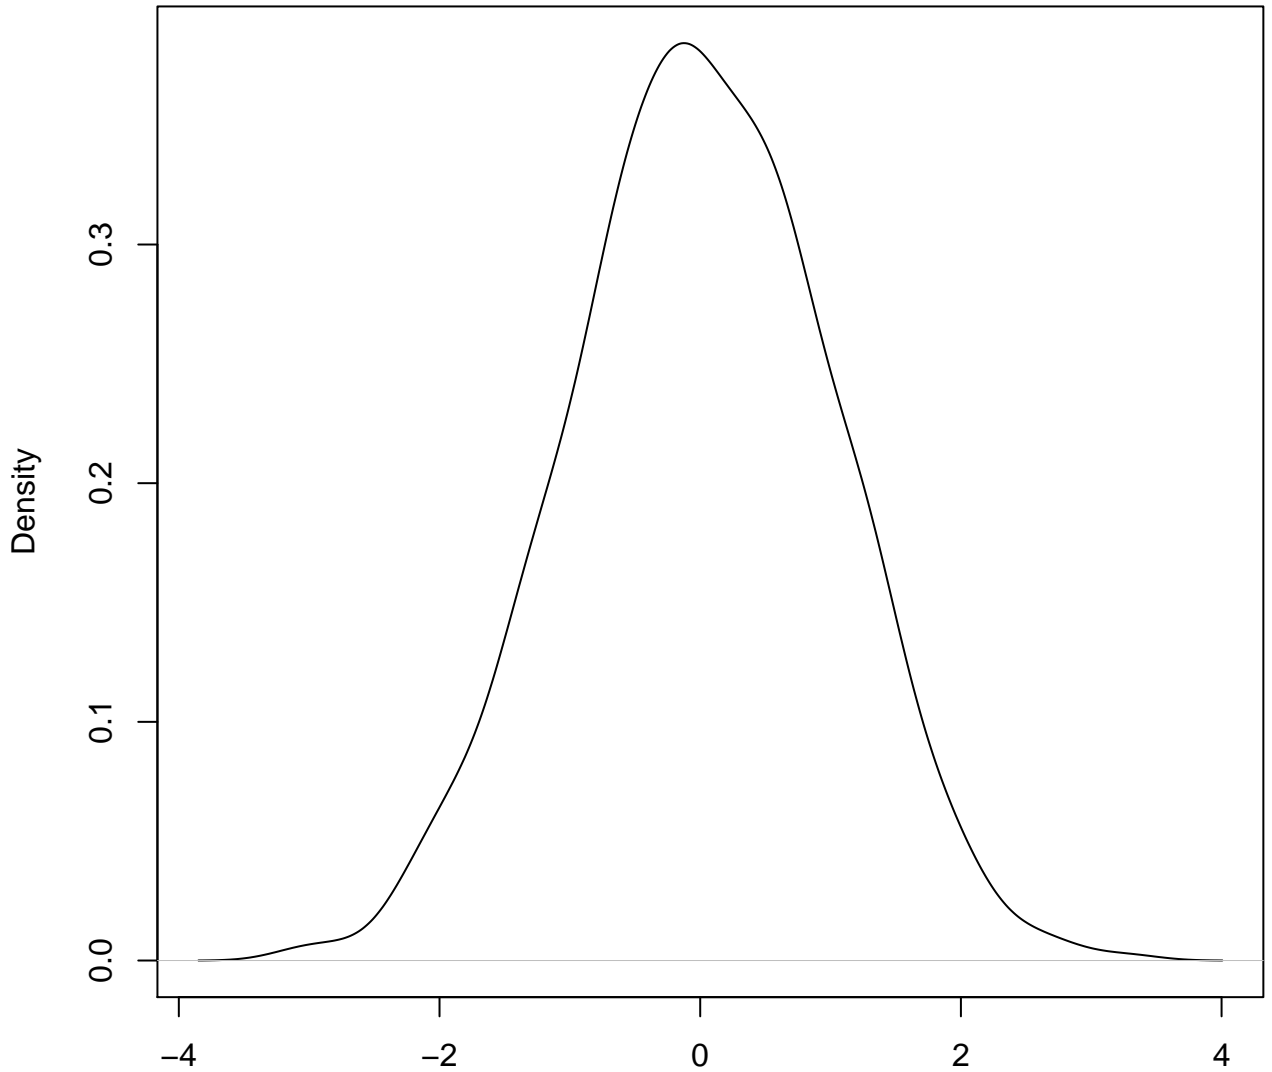

# Transformed Nr-CAM distribution

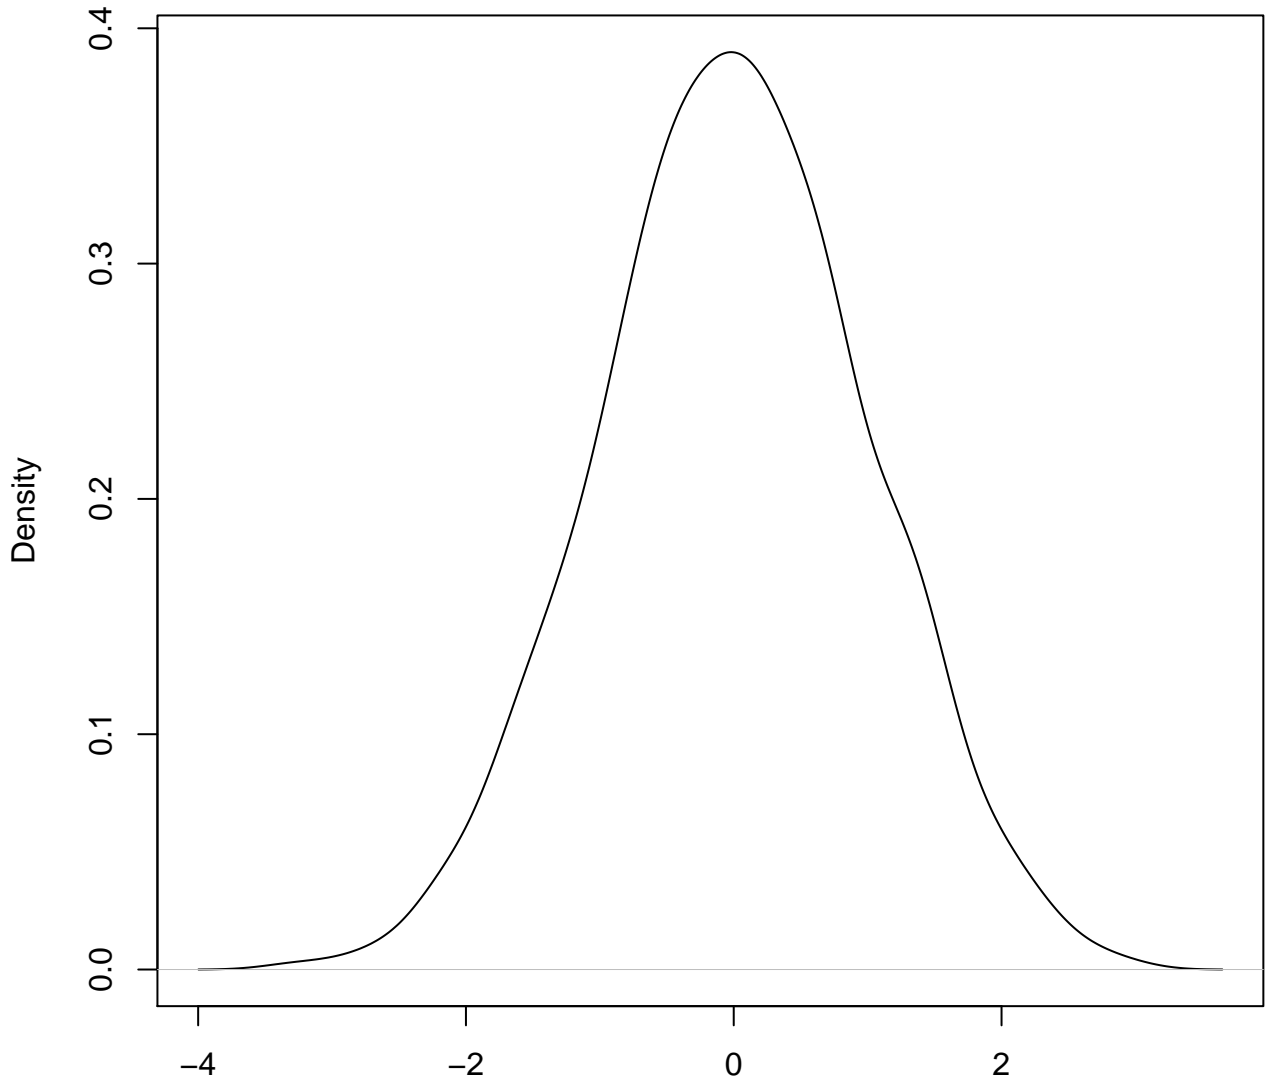

# Transformed KYNU distribution

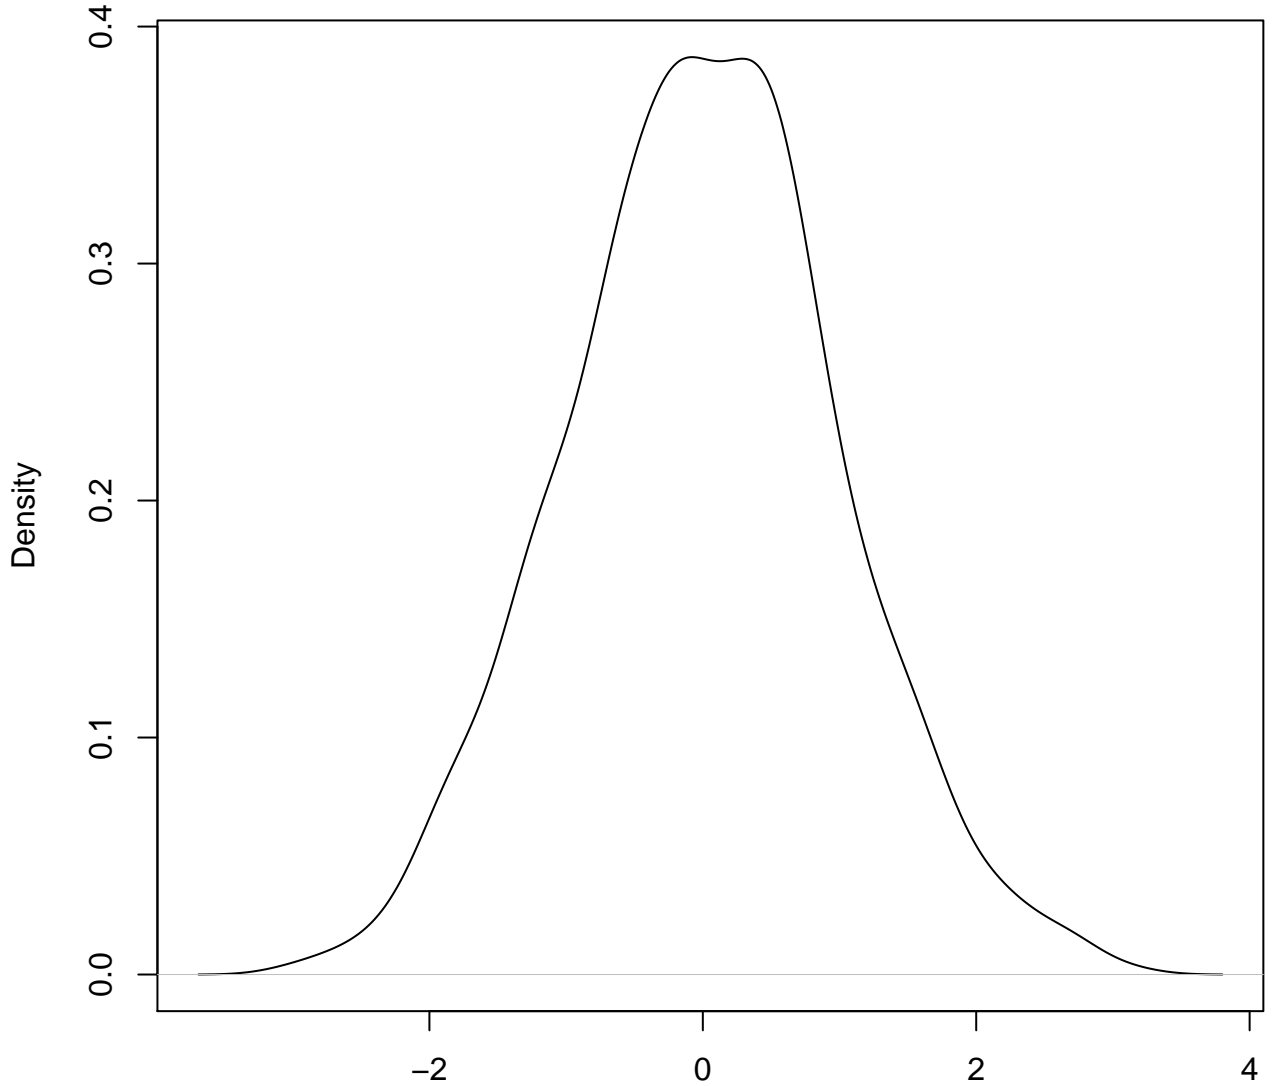

Supplement: 41467_2019_11177_MOESM12_ESM.pdf [file 41467_2019_11177_MOESM12_ESM.pdf]
