# Supplementary material for: Genome and epigenome wide studies of neurological protein biomarkers in the Lothian Birth Cohort 1936
Source: PubMed Central journal article supplement (PMC6639385; doi:10.1038/s41467-019-11177-x), 2019-07-18
Supplement: 41467_2019_11177_MOESM1_ESM.pdf [file 41467_2019_11177_MOESM1_ESM.pdf]

**Genome and epigenome wide studies of neurological protein biomarkers in the Lothian  
Birth Cohort 1936**

Hillary *et al.*

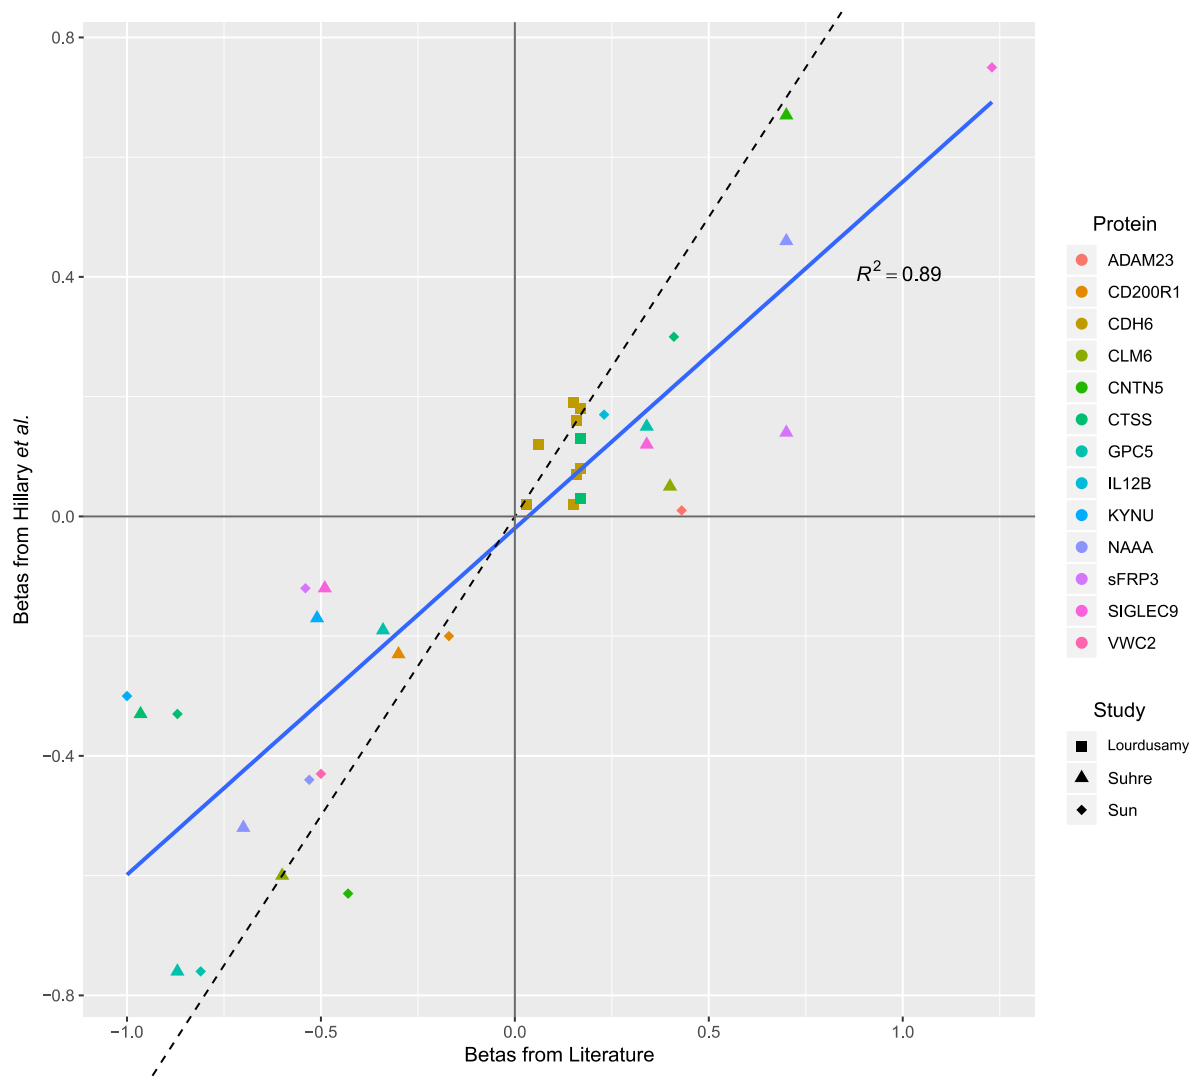

**Supplementary Figure 1.** The correlation of effect sizes from the present study, Hillary *et al.* and those from pre-existing literature. Blue line indicates correlation between effect sizes ( $r^2 = 0.89$ ), black dotted line indicates hypothetical perfect correlation ( $r^2 = 1.0$ ) for visual comparison.

Genome-wide association studies on Olink® neurology proteins

LBC study participants recruited and blood samples drawn at wave 1  
(mean age = 70; n = 1,091)

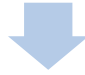

Genotyping performed on LBC1936 participants (n = 1,005). Exclusion criteria: disagreement between genetic and reported gender (n = 12), relatedness (n = 8), samples with call rate  $\leq 0.95$  (n = 16) and those showing evidence of non-European descent by multidimensional scaling (n = 1)

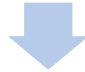

Blood samples assayed by Olink® using neurology panel at wave 2 (n = 814). Following quality control, proteomic and genotyping data combined for GWAS (n = 750)

*Epigenome-wide association studies on Olink® neurology proteins*

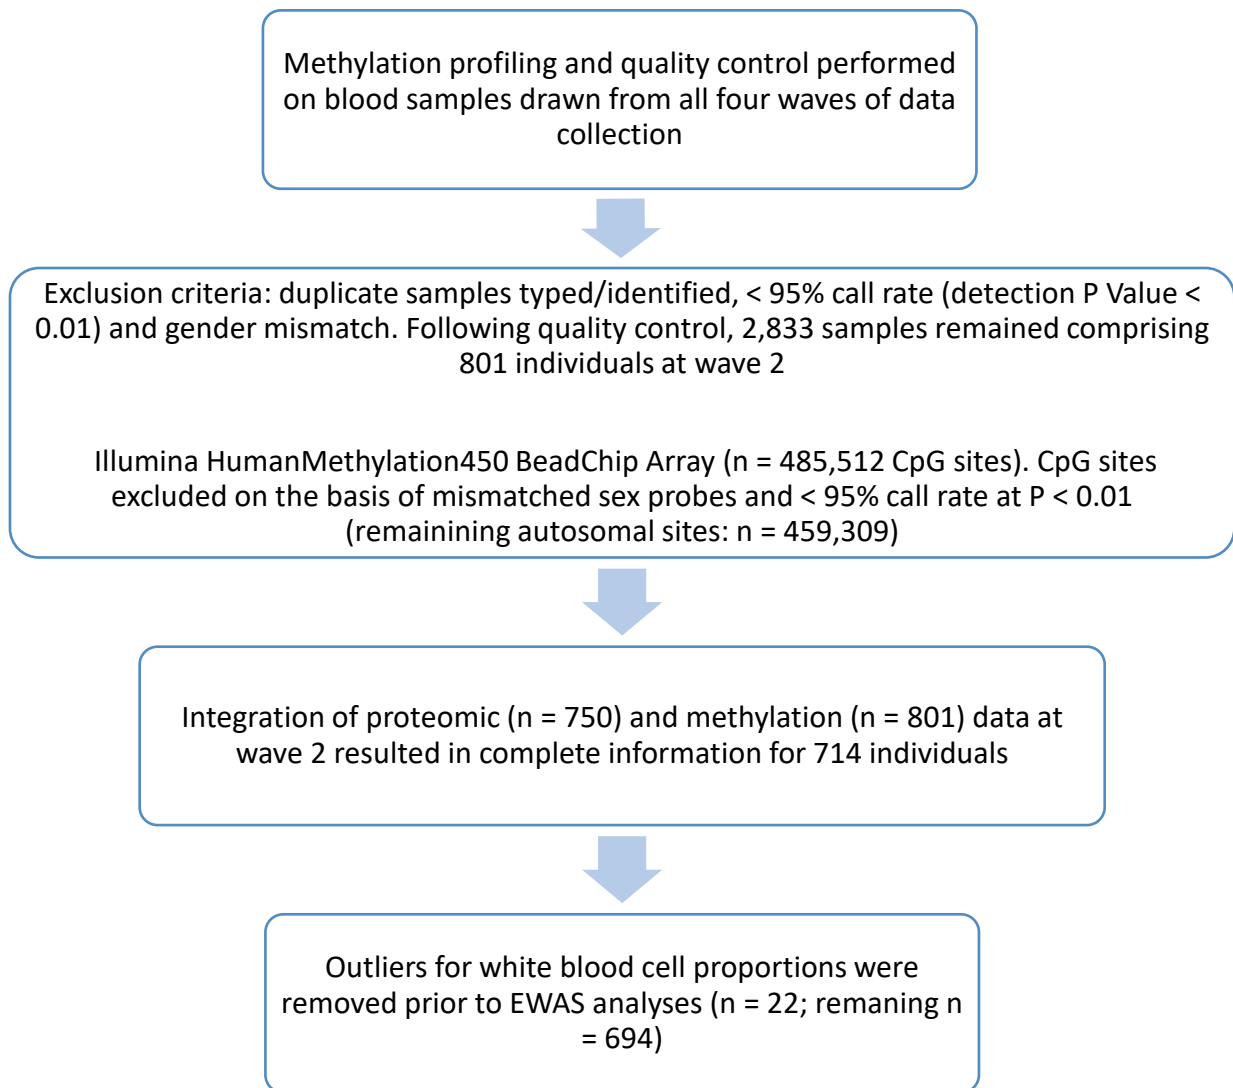

**Supplementary Figure 2.** Flow chart for inclusion/exclusion of study participants in Lothian Birth Cohort 1936. The Lothian Birth Cohort of 1936 (LBC1936) represents a sample of healthy older adults. For inclusion, participants must not have had a neurodegenerative disease at Wave 1. Genotypic and DNA methylation data were obtained from individuals and integrated with proteomic data measured at Wave 2 of data collection (mean age: 73). A flow chart describing the inclusion and exclusion criteria for the genome- and epigenome-wide association studies (GWAS/EWAS) on Olink® neurological protein levels in LBC1936 participants is presented above.

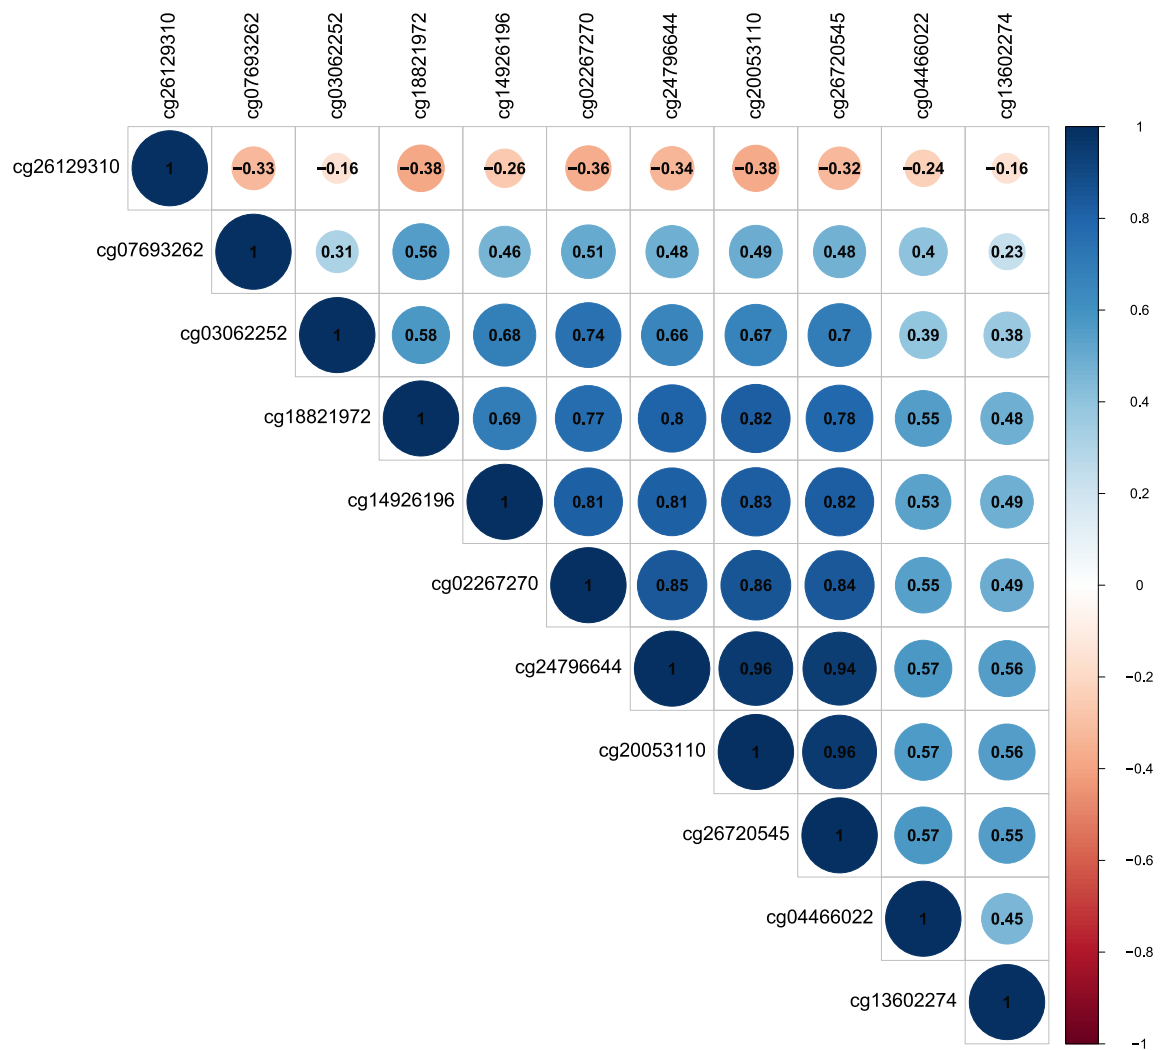

**Supplementary Figure 3.** The correlation between eleven CpG sites significantly associated with normalised MDGA1 levels in the Lothian Birth Cohort of 1936. Blue values indicate positive correlations, red values indicate negative correlations.

Supplementary Table 1. R2 measures of linkage disequilibrium between non-overlapping pQTLs (discordant between COJO/FUMA) identified by COJO and FUMA (mapped to British population)

| Protein  | COJO       | FUMA        | R2          |
|----------|------------|-------------|-------------|
| ADAM 23  | rs1448903  | rs13429599  | 0.05        |
| ADAM22   | rs12535512 | rs13233308  | <b>0.78</b> |
| CD200R1  | rs12233417 | rs79834152  | <b>1.00</b> |
| CD200R1  | rs12233417 | rs7622812   | 0.02        |
| CD200R1  | rs12233417 | rs12493830  | 0.01        |
| CD200R1  | rs4857414  | rs12493830  | <b>0.91</b> |
| CD200R1  | rs4857414  | rs79834152  | 0.01        |
| CD200R1  | rs4857414  | rs7622812   | 0.01        |
| CD200R1  | rs7622812  | rs79834152  | 0.01        |
| CD200R1  | rs7622812  | rs12493830  | 0.01        |
| CDH6     | rs1921086  | rs4406147   | <b>0.87</b> |
| CLEC10A  | rs444207   | rs2002664   | 0.24        |
| CLEC10A  | rs444207   | rs12941354  | 0.04        |
| CLM-1    | rs10512597 | rs9903991   | <b>0.97</b> |
| CLM-1    | rs10512597 | rs62084910  | 0.12        |
| CLM-1    | rs10512597 | rs11655369  | 0.09        |
| CLM-1    | rs10512597 | rs34074270  | 0.09        |
| CLM-1    | rs10512597 | rs112607667 | 0.04        |
| CLM-1    | rs10512597 | rs16978165  | 0.04        |
| CLM-6    | rs1171196  | rs708601    | <b>1.00</b> |
| CLM-6    | rs1171196  | rs2706505   | 0.01        |
| CNTN5    | rs1461674  | rs1461677   | <b>1.00</b> |
| CTSC     | rs217116   | rs217053    | 0.67        |
| CTSC     | rs217116   | rs17756204  | 0.01        |
| CTSS     | rs2228099  | rs2867296   | <b>0.89</b> |
| CTSS     | rs4970986  | rs2867296   | <b>1.00</b> |
| DRAXIN   | rs12139487 | rs12047253  | <b>1.00</b> |
| FcRL2    | rs12568320 | rs2065883   | <b>1.00</b> |
| FLRT2    | rs4904262  | rs2746995   | <b>1.00</b> |
| gal-8    | rs495828   | rs507666    | 0.71        |
| GDNF     | rs17386472 | rs11747340  | <b>0.94</b> |
| GPC5     | rs2352029  | rs1929922   | <b>1.00</b> |
| GPC5     | rs2352029  | rs138994828 | 0.10        |
| IL12     | rs10045431 | rs6556416   | <b>0.90</b> |
| KYNU     | rs16858172 | rs78201785  | <b>1.00</b> |
| LAIR     | rs17606864 | rs111825282 | 0.04        |
| LAIR     | rs17606864 | rs2277972   | 0.04        |
| LAIR     | rs17606864 | rs73070113  | 0.03        |
| LAIR     | rs17606864 | rs2042290   | 0.01        |
| LAIR     | rs2042290  | rs17606864  | <b>1.00</b> |
| LAIR     | rs2042290  | rs111825282 | 0.04        |
| LAIR     | rs2042290  | rs2277972   | 0.04        |
| LAIR     | rs2042290  | rs73070113  | 0.03        |
| LXN      | rs2228243  | rs72625023  | 0.43        |
| MATN3    | rs3731663  | rs1147118   | 0.29        |
| MDGA1    | rs6458011  | rs9349050   | 0.48        |
| MDGA1    | rs6458011  | rs3846881   | 0.22        |
| MDGA1    | rs6458011  | rs36086366  | 0.10        |
| MDGA1    | rs6458011  | rs114253244 | 0.09        |
| MDGA1    | rs6458011  | rs146513610 | 0.09        |
| MDGA1    | rs6458011  | rs73415453  | 0.04        |
| MDGA1    | rs6938061  | rs9349050   | <b>0.92</b> |
| MDGA1    | rs6938061  | rs36086366  | 0.20        |
| MDGA1    | rs6938061  | rs73415453  | 0.08        |
| MDGA1    | rs6938061  | rs3846881   | 0.07        |
| MDGA1    | rs6938061  | rs114253244 | 0.05        |
| MDGA1    | rs6938061  | rs146513610 | 0.05        |
| N2DL2    | rs1853665  | rs9383621   | <b>1.00</b> |
| NAAA     | rs1857821  | rs112197434 | <b>0.75</b> |
| N-CDase  | rs10508921 | rs11597071  | 0.00        |
| N-CDase  | rs10508921 | rs146075547 | 0.00        |
| N-CDase  | rs1898198  | rs11597071  | 0.16        |
| N-CDase  | rs1898198  | rs146075547 | 0.01        |
| NEP      | rs4687657  | rs35004449  | <b>1.00</b> |
| SCARF2   | rs361603   | rs9610447   | <b>0.82</b> |
| sFRP-3   | rs1561369  | rs288326    | <b>1.00</b> |
| sFRP-3   | rs1561369  | rs143674995 | 0.00        |
| sFRP-3   | rs1561369  | rs72890325  | 0.00        |
| Siglec_9 | rs4857414  | rs12496730  | <b>0.91</b> |
| Siglec_9 | rs4857414  | rs2673908   | 0.01        |
| Siglec-9 | rs2075803  | rs2673908   | <b>1.00</b> |
| Siglec-9 | rs2075803  | rs12496730  | 0.00        |
| TMPRSS5  | rs2465651  | rs7110738   | <b>0.96</b> |
| VWC2     | rs481076   | rs482968    | <b>1.00</b> |

Supplementary Table 2. Bayesian tests of colocalisation for *cis* pQTLs and *cis* eQTLs

|    | <b>Protein</b> | <b>Gene</b>    | <b>PP.H0</b> | <b>PP.H1</b> | <b>PP.H2</b> | <b>PP.H3</b> | <b>PP.H4</b> |
|----|----------------|----------------|--------------|--------------|--------------|--------------|--------------|
| 1  | DRAXIN         | <i>DRAXIN</i>  | 0.00         | 0.00         | 0.00         | 0.00         | <b>1.00</b>  |
| 2  | KYNU           | <i>KYNU</i>    | 0.00         | 0.00         | 0.00         | 0.02         | <b>0.97</b>  |
| 3  | MDGA1          | <i>MDGA1</i>   | 0.00         | 0.00         | 0.00         | 0.05         | <b>0.95</b>  |
| 4  | SIGLEC9        | <i>SIGLEC9</i> | 0.00         | 0.06         | 0.00         | 0.04         | <b>0.89</b>  |
| 5  | LAIR           | <i>LAIR2</i>   | 0.00         | 0.09         | 0.00         | 0.14         | <b>0.77</b>  |
| 6  | CLM_6          | <i>CD300C</i>  | 0.00         | 0.00         | <b>0.76</b>  | 0.19         | 0.04         |
| 7  | NAAA           | <i>NAAA</i>    | 0.00         | 0.00         | 0.00         | <b>1.00</b>  | 0.00         |
| 8  | CLEC10A        | <i>CLEC10A</i> | 0.00         | 0.00         | 0.00         | <b>1.00</b>  | 0.00         |
| 9  | FcRL2          | <i>FCRL2</i>   | 0.00         | 0.00         | 0.00         | <b>1.00</b>  | 0.00         |
| 10 | CTSS           | <i>CTSS</i>    | 0.00         | 0.00         | 0.00         | <b>1.00</b>  | 0.00         |
| 11 | CLM_1          | <i>CD300LF</i> | 0.00         | 0.00         | 0.00         | <b>1.00</b>  | 0.00         |
| 12 | CTSC           | <i>CTSC</i>    | 0.00         | 0.00         | 0.00         | <b>0.83</b>  | 0.17         |

H0 (no causal variant), H1 (causal variant for protein only), H2 (causal variant for expression only), H3 (two distinct causal variants), H4 (common causal variant)

Supplementary Table 3. Genome-wide significant CpG sites associated with circulating levels of Olink neurological biomarkers as identified using limma

| Biomarker | CpG site   | CHR of CpG | CpG Position | Annotation of CpG | Feature | CpG Island | log FC | Ave Expression | t statistic | P Value   | B      | Chromosome of Biomarker | Gene Start | Gene End  | Type  |
|-----------|------------|------------|--------------|-------------------|---------|------------|--------|----------------|-------------|-----------|--------|-------------------------|------------|-----------|-------|
| CRTAM     | cg02305850 | 11         | 126152462    | TIRAP             | TSS1500 | N_Shore    | 0.01   | 0.11           | 6.50        | 1.65E-10  | 10.99  | 11                      | 122838500  | 122872639 | Cis   |
| CRTAM     | cg15617814 | 11         | 131780492    | NTM               | TSS1500 | Island     | 0.02   | 0.11           | 6.61        | 8.02E-11  | 11.70  | 11                      | 122838500  | 122872639 | Cis   |
| CRTAM     | cg04983516 | 11         | 79151719     | ODZ4              | TSS200  | Island     | 0.01   | 0.06           | 6.56        | 1.15E-10  | 11.35  | 11                      | 122838500  | 122872639 | Trans |
| G_CSF     | cg09349128 | 22         | 50327986     |                   |         | N_Shore    | -0.01  | 0.29           | -7.10       | 3.25E-12  | 14.81  | 17                      | 40015361   | 40017813  | Trans |
| MATN3     | cg24416238 | 2          | 20211868     | MATN3             | Body    | N_Shore    | 0.01   | 0.48           | 7.30        | 8.45E-13  | 16.12  | 2                       | 20012694   | 19992111  | Cis   |
| MDGA1     | cg20053110 | 6          | 37617864     | MDGA1             | Body    | Island     | 0.14   | 0.56           | 29.19       | 1.70E-119 | 261.18 | 6                       | 37699306   | 37630679  | Cis   |
| MDGA1     | cg24796644 | 6          | 37617956     | MDGA1             | Body    | Island     | 0.15   | 0.54           | 27.79       | 7.25E-112 | 243.61 | 6                       | 37699306   | 37630679  | Cis   |
| MDGA1     | cg26720545 | 6          | 37618009     | MDGA1             | Body    | Island     | 0.10   | 0.54           | 27.52       | 2.16E-110 | 240.21 | 6                       | 37699306   | 37630679  | Cis   |
| MDGA1     | cg14926196 | 6          | 37616482     | MDGA1             | Body    | Island     | 0.13   | 0.55           | 23.74       | 1.06E-89  | 192.57 | 6                       | 37699306   | 37630679  | Cis   |
| MDGA1     | cg18821972 | 6          | 37660403     | MDGA1             | Body    | N_Shelf    | 0.06   | 0.64           | 22.79       | 1.75E-84  | 180.57 | 6                       | 37699306   | 37630679  | Cis   |
| MDGA1     | cg02267270 | 6          | 37616410     | MDGA1             | Body    | Island     | 0.09   | 0.54           | 22.66       | 8.52E-84  | 178.98 | 6                       | 37699306   | 37630679  | Cis   |
| MDGA1     | cg03062252 | 6          | 37616598     | MDGA1             | Body    | Island     | 0.05   | 0.19           | 15.58       | 1.33E-46  | 93.45  | 6                       | 37699306   | 37630679  | Cis   |
| MDGA1     | cg07693262 | 6          | 37625029     | MDGA1             | Body    | N_Shore    | 0.02   | 0.75           | 15.32       | 2.60E-45  | 90.49  | 6                       | 37699306   | 37630679  | Cis   |
| MDGA1     | cg04466022 | 6          | 37618123     | MDGA1             | Body    | Island     | 0.01   | 0.95           | 12.22       | 5.42E-31  | 57.64  | 6                       | 37699306   | 37630679  | Cis   |
| MDGA1     | cg13602274 | 6          | 37667518     |                   |         | S_Shore    | 0.02   | 0.36           | 11.75       | 5.26E-29  | 53.09  | 6                       | 37699306   | 37630679  | Cis   |
| MDGA1     | cg26129310 | 6          | 37664451     | MDGA1             | Body    | Island     | 0.00   | 0.03           | -9.25       | 3.35E-19  | 30.68  | 6                       | 37699306   | 37630679  | Cis   |
| N_CDase   | cg22645355 | 10         | 52002547     | ASAH2             | Body    | OpenSea    | 0.06   | 0.84           | 7.60        | 1.08E-13  | 18.16  | 10                      | 50248610   | 50182778  | Cis   |
| N_CDase   | cg16435686 | 10         | 47964834     |                   |         | N_Shelf    | -0.07  | 0.53           | -7.53       | 1.78E-13  | 17.67  | 10                      | 50248610   | 50182778  | Cis   |
| NEP       | cg06690548 | 4          | 139162808    | SLC7A11           | Body    | OpenSea    | -0.02  | 0.82           | -7.42       | 3.77E-13  | 16.93  | 3                       | 155024124  | 155183729 | Trans |
| NEP       | cg11645453 | 3          | 52864694     | ITIH4             | 5'UTR   | OpenSea    | 0.02   | 0.64           | 6.67        | 5.68E-11  | 12.00  | 3                       | 155024124  | 155183729 | Trans |
| NEP       | cg18404041 | 3          | 52824283     | ITIH1             | Body    | OpenSea    | -0.02  | 0.42           | -6.68       | 5.31E-11  | 12.08  | 3                       | 155024124  | 155183729 | Trans |
| SIGLEC1   | cg05696877 | 1          | 79088769     | IFI44L            | 5'UTR   | OpenSea    | -0.03  | 0.70           | -7.20       | 1.72E-12  | 15.44  | 20                      | 3707128    | 3686970   | Trans |
| SIGLEC1   | cg08122652 | 3          | 122281939    | PARP9             | 5'UTR   | N_Shore    | -0.01  | 0.79           | -6.65       | 6.51E-11  | 11.87  | 20                      | 3707128    | 3686970   | Trans |
| SMPD1     | cg18477969 | 11         | 6415462      | SMPD1             | Body    | S_Shelf    | 0.05   | 0.82           | 7.92        | 1.03E-14  | 20.46  | 11                      | 6390431    | 6394998   | Cis   |
| TN_R      | cg03636183 | 19         | 17000585     | F2RL3             | Body    | N_Shore    | 0.02   | 0.63           | 7.12        | 2.84E-12  | 14.93  | 1                       | 175315194  | 175743770 | Trans |
| TN_R      | cg05575921 | 5          | 373378       | AHRR              | Body    | N_Shore    | 0.02   | 0.80           | 6.49        | 1.68E-10  | 10.92  | 1                       | 175315194  | 175743770 | Trans |



Supplementary Table 4. Genome-wide significant CpG sites associated with circulating levels of Olink neurological biomarkers as identified using OSCA (CpGs which are discordant with limma are emboldened)

| Biomarker | CpG site          | CHR of CpG | CpG Position | Annotation of CpG                         | Strand | CpG Island | B      | SE   | P Value   | Chromosome | Gene Start | Gene End  | Type  |
|-----------|-------------------|------------|--------------|-------------------------------------------|--------|------------|--------|------|-----------|------------|------------|-----------|-------|
| MATN3     | cg24416238        | 2          | 20211868     | MATN3                                     | +      | N_Shore    | 6.36   | 0.79 | 6.76E-16  | 2          | 20012694   | 19992111  | Cis   |
| MDGA1     | cg02267270        | 6          | 37616410     | MDGA1                                     | -      | Island     | 5.40   | 0.22 | 4.37E-137 | 6          | 37699306   | 37630679  | Cis   |
| MDGA1     | cg03062252        | 6          | 37616598     | MDGA1                                     | -      | Island     | 6.18   | 0.36 | 5.47E-65  | 6          | 37699306   | 37630679  | Cis   |
| MDGA1     | cg07693262        | 6          | 37625029     | MDGA1                                     | +      | N_Shore    | 15.08  | 0.87 | 2.53E-67  | 6          | 37699306   | 37630679  | Cis   |
| MDGA1     | cg14926196        | 6          | 37616482     | MDGA1                                     | -      | Island     | 3.81   | 0.16 | 9.28E-128 | 6          | 37699306   | 37630679  | Cis   |
| MDGA1     | cg18821972        | 6          | 37660403     | MDGA1                                     | -      | N_Shelf    | 7.95   | 0.34 | 1.32E-119 | 6          | 37699306   | 37630679  | Cis   |
| MDGA1     | cg20053110        | 6          | 37617864     | MDGA1                                     | +      | Island     | 4.15   | 0.14 | 8.76E-194 | 6          | 37699306   | 37630679  | Cis   |
| MDGA1     | cg24796644        | 6          | 37617956     | MDGA1                                     | +      | Island     | 3.87   | 0.13 | 5.88E-193 | 6          | 37699306   | 37630679  | Cis   |
| MDGA1     | cg26720545        | 6          | 37618009     | MDGA1                                     | +      | Island     | 5.57   | 0.19 | 3.96E-188 | 6          | 37699306   | 37630679  | Cis   |
| MDGA1     | <b>cg24442454</b> | 6          | 37616803     | MDGA1                                     | +      | NA         | 8.09   | 0.40 | 4.73E-89  | 6          | 37699306   | 37630679  | Cis   |
| MDGA1     | <b>cg00807871</b> | 6          | 37617124     | MDGA1                                     | +      | NA         | 4.31   | 0.18 | 2.51E-127 | 6          | 37699306   | 37630679  | Cis   |
| N_CDase   | cg16435686        | 10         | 47964834     |                                           | -      | N_Shelf    | -1.11  | 0.15 | 1.32E-13  | 10         | 50248610   | 50182778  | Cis   |
| N_CDase   | cg22645355        | 10         | 52002547     | ASAH2;ASAH2                               | -      | NA         | 1.49   | 0.20 | 1.52E-13  | 10         | 50248610   | 50182778  | Cis   |
| SMPD1     | cg18477969        | 11         | 6415462      | SMPD1;SMPD1;SMPD1                         | +      | S_Shelf    | 1.83   | 0.24 | 8.95E-15  | 11         | 6390431    | 6394998   | Cis   |
| NEP       | cg06690548        | 4          | 139162808    | SLC7A11                                   | -      | NA         | -3.32  | 0.51 | 1.08E-10  | 3          | 155024124  | 155183729 | Trans |
| NEP       | cg11645453        | 3          | 52864694     | ITIH4;ITIH4;ITIH4;ITIH4                   | +      | NA         | 3.19   | 0.48 | 3.98E-11  | 3          | 155024124  | 155183729 | Trans |
| SIGLEC1   | cg05696877        | 1          | 79088769     | IFI44L                                    | +      | NA         | -2.75  | 0.43 | 2.06E-10  | 20         | 3707128    | 3686970   | Trans |
| SIGLEC1   | cg08122652        | 3          | 122281939    | PARP9;PARP9;DTX3L;PARP9;PARP9;PARP9;PARP9 | -      | N_Shore    | -6.97  | 1.04 | 2.08E-11  | 20         | 3707128    | 3686970   | Trans |
| TN_R      | cg03636183        | 19         | 17000585     | F2RL3                                     | -      | N_Shore    | 5.21   | 0.67 | 5.93E-15  | 1          | 175315194  | 175743770 | Trans |
| TN_R      | cg05575921        | 5          | 373378       | AHRR                                      | +      | N_Shore    | 3.02   | 0.43 | 3.73E-12  | 1          | 175315194  | 175743770 | Trans |
| G_CSF     | cg09349128        | 22         | 50327986     |                                           | -      | N_Shore    | -12.77 | 1.45 | 1.32E-18  | 17         | 40015361   | 40017813  | Trans |
| G_CSF     | <b>cg12054453</b> | 17         | 57915717     | TMEM49                                    | +      | NA         | -4.18  | 0.52 | 1.05E-15  | 17         | 40015361   | 40017813  | Trans |
| G_CSF     | <b>cg16936953</b> | 17         | 57915665     | TMEM49                                    | +      | NA         | -4.11  | 0.57 | 4.06E-13  | 17         | 40015361   | 40017813  | Trans |

Supplementary Table 5. Bidirectional Mendelian Randomisation analyses to test for causal relationships between DNA methylation and Olink® protein levels (Wald ratio test)

| Instrumental Variable | CpG Site                    | <i>DNA methylation affecting protein levels</i> |      |                 | <i>Protein levels causally affecting DNA methylation</i> |      |                  |
|-----------------------|-----------------------------|-------------------------------------------------|------|-----------------|----------------------------------------------------------|------|------------------|
|                       |                             | Beta                                            | SE   | P Value         | Beta                                                     | SE   | P Value          |
| <b><i>MATN3</i></b>   |                             |                                                 |      |                 |                                                          |      |                  |
| rs3731663             | cg24416238 ( <i>MATN3</i> ) | 0.80                                            | 0.09 | <b>6.60E-18</b> | 1.24                                                     | 0.09 | <b>4.50E-40</b>  |
| <b><i>MDGA1</i></b>   |                             |                                                 |      |                 |                                                          |      |                  |
| rs6938061             | cg20053110 ( <i>MDGA1</i> ) | 1.00                                            | 0.05 | <b>1.40E-87</b> | 0.99                                                     | 0.02 | <b>1.20E-102</b> |
| rs6458011             | cg20053110 ( <i>MDGA1</i> ) | -1.16                                           | 0.06 | <b>1.40E-87</b> | -0.84                                                    | 0.04 | <b>8.00E-111</b> |
| <b><i>NEP</i></b>     |                             |                                                 |      |                 |                                                          |      |                  |
| rs4687657             | cg11645453 ( <i>ITIH4</i> ) | 0.63                                            | 0.07 | <b>2.60E-19</b> | 1.58                                                     | 0.07 | <b>1.90E-111</b> |
| rs4687657             | cg18404041 ( <i>ITIH1</i> ) | -0.56                                           | 0.06 | <b>2.60E-19</b> | -1.77                                                    | 0.21 | <b>3.54E-17</b>  |
